# Supplementary material
Source: Royal Society of Chemistry journal article supplement (doi:10.1039/d6cc02335e)

## Supporting Information

### Visible Light-Induced Carbonylation of Alkenes to Construct $\alpha$ -Branched Aryl Ketone Derivatives

Zi-Wei Xi,<sup>a</sup> Zhuo-Ying Dong,<sup>a</sup> Zheng-Kai Ji,<sup>a</sup> Kai Zhang,<sup>a</sup> Fu-Gang Zhao,<sup>a</sup> Qi-Liang Yuan,<sup>c\*</sup> Yong-Miao Shen<sup>a, b\*</sup>

#### AUTHOR ADDRESS

<sup>a</sup>School of Chemistry and Chemical Engineering, Zhejiang Sci-Tech University, Hangzhou, Zhejiang 310018, PR China. E-mail: shenym@zstu.edu.cn

<sup>b</sup>Zhejiang Sci-Tech University Shengzhou Innovation Research Institute, Shengzhou 312400, PR China.

<sup>c</sup>Zhejiang Zhongxin Fluoride Materials Co., Ltd, Shaoxing, Zhejiang 312369, PR China. E-mail: yuanqiliang@126.com

#### Table of Contents

|                                                                                    |     |
|------------------------------------------------------------------------------------|-----|
| 1. General Information .....                                                       | S2  |
| 2. Synthesis of $\alpha$ -(trifluoromethyl)styrenes and drug-derived products..... | S3  |
| 3. Synthesis of Oxime, Amide and Isoxazole.....                                    | S4  |
| 4. General Procedure for Synthesis of Pzproducts 4/5/6 .....                       | S5  |
| 5. Optimization Experiments.....                                                   | S5  |
| 6. Gram-Scale Reaction.....                                                        | S7  |
| 7. Mechanism Studies.....                                                          | S8  |
| 8. DFT Calculations.....                                                           | S11 |
| 9. Characterization Data of Compounds.....                                         | S30 |
| 10. X-ray Crystallographic Analysis .....                                          | S51 |
| 11. References .....                                                               | S52 |
| 12. <sup>1</sup> H NMR, <sup>13</sup> C NMR and <sup>19</sup> F NMR Spectra.....   | S53 |

## 1. General Information

**General Remarks.** Catalytic reactions were performed under an atmosphere of Air in a glassware. All solvents were purchased from Energy Chemical, Macklin Biochemical or Sinopharm reagents. All chemicals were used directly without any further purification. Analytical TLC was performed with silica gel GF254 plates. For column chromatography, a 200-300 mesh silica gel was employed. Room temperature (r.t.) is 23-25 °C.

**Instrumentation.** Deuterated solvents were purchased from Cambridge Isotope Laboratories.  $^1\text{H}$  NMR spectra were recorded on Bruker AVANCE III 400 and INOVA instruments with 400 MHz frequencies, and  $^{13}\text{C}$  NMR spectra were recorded on Bruker AVANCE III 400 with 100 MHz frequencies.  $^{19}\text{F}$  NMR spectra were recorded on a Bruker AVANCE III 400 spectrometer with 376 MHz. Chemical shifts ( $\delta$ ) were reported in ppm relative to the residual solvent signal ( $\text{CDCl}_3$   $\delta = 7.26$  for  $^1\text{H}$  NMR and  $\delta = 77.0$  for  $^{13}\text{C}$  NMR). Chemical shifts (ppm) were recorded with tetramethylsilane (TMS) as the internal reference standard. Multiplicities are given as s (singlet), d (doublet), t (triplet), dd (doublet of doublets), td (triplet of doublets) or m (multiplet). HRMS was obtained using a Q-TOF instrument equipped with an ESI source. Data collection for crystal structure was performed at room temperature using Mo  $K\alpha$  radiation on a Bruker APEXII diffractometer.

**Light source in detail.** The light source used for photochemical experiments (**Figure S1**). LED: 3W ( $\lambda = 420$  nm). Product model: D800X/H276155-S. Manufacturer: Howsuper Technology Co., Ltd (China). The reaction vessel is borosilicate glass test tube and no filters were applied.

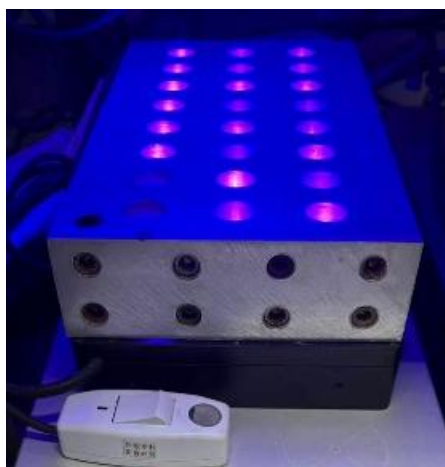

**Figure S1. Reaction device**

LED fixed lamp (**Figure S2**), 15-40 W ( $\lambda = 420 \pm 15$  nm). Product model: PLS-LED 100. Manufacturer: Beijing Perfectlight Technology Co., Ltd (China). The reaction vessel is borosilicate glass test tube and no filters were applied. The distance from the light source to the irradiation vessel is 4-5 cm.

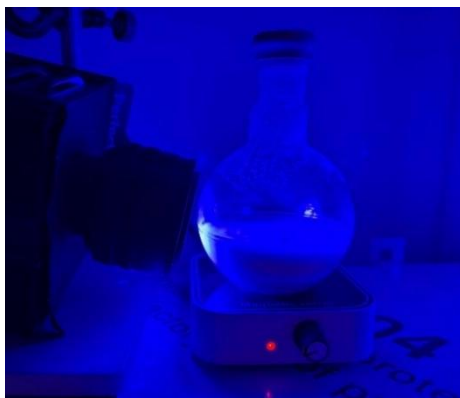

Figure S2. Photoreaction set-up for scale-up reaction.

## 2. Synthesis of $\alpha$ -(trifluoromethyl)styrenes and drug-derived products

### 2.1 Preparation of $\alpha$ -(trifluoromethyl)styrenes<sup>1</sup>

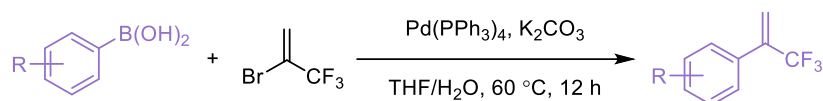

Under the  $N_2$  atmosphere, arylboronic acid (10.0 mmol),  $Pd(PPh_3)_4$  (346.7 mg, 0.3 mmol, 3 mol%),  $K_2CO_3$  (2.76 g, 20.0 mmol) were dissolved in THF (30.0 mL) in a three-neck flask. Then, 2-bromo-3,3,3-trifluoroprop-1-ene (3.50 g, 20.0 mmol) was added dropwise into the mixture. The mixture was heated to 60 °C for 12 h. Then the mixed solution was extracted with  $H_2O$  and EA. The organic layer was washed with brine, dried over  $Na_2SO_4$ , and then concentrated under reduced pressure. The resulting residue was purified by column chromatography (PE) to afford the  $\alpha$ -(trifluoromethyl)styrenes.

### 2.2 Preparation of estrone-derived alkenes<sup>2</sup>

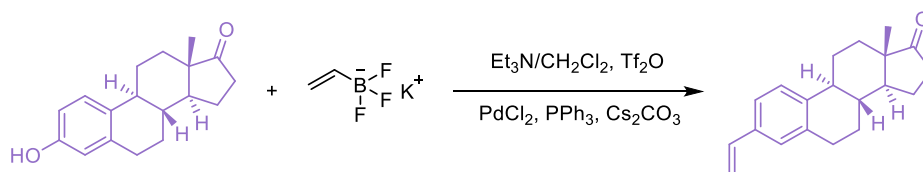

Estrone (1.35 g, 5 mmol),  $CH_2Cl_2$  (20 mL) and  $Et_3N$  (1.01 g, 10 mmol) were added to a 100 ml round-bottom flask. The mixture was cooled to 0 °C in an ice water bath and  $Tf_2O$  (1.55 g, 5.5 mmol) was added dropwise. The mixture was then warmed to room temperature and stirred under a  $N_2$  atmosphere for 3 h. The resulting brown mixture was diluted with  $CH_2Cl_2$ , washed with saturated  $NH_4Cl$ , and the aqueous layer was extracted with  $CH_2Cl_2$ . The combined organic layer was dried over  $Na_2SO_4$ , and the filtrate was concentrated under reduced pressure to afford a crude product. The crude product, potassium vinyltrifluoroborate (0.74 g, 5.5 mmol),  $Cs_2CO_3$  (4.89 g, 15 mmol),  $PPh_3$  (78.6 mg, 0.3 mmol),  $PdCl_2$  (17.7 mg, 0.1 mmol),  $H_2O$  (2.0 mL) and THF (18 mL) were placed in the schlenk tube. The reaction system was stirred under  $N_2$  atmosphere at 85 °C for 19 h. After completion of the reaction, the mixture was allowed to cool to room temperature and extracted with  $H_2O$  and  $CH_2Cl_2$ . The combined organic layer was dried over  $Na_2SO_4$ , and the filtrate was concentrated under reduced pressure. The crude product was purified by column

chromatography (PE/EA = 10/1) to give white solid.

## 2.2 Preparation of Clofibrate-derived boronic acids<sup>3</sup>

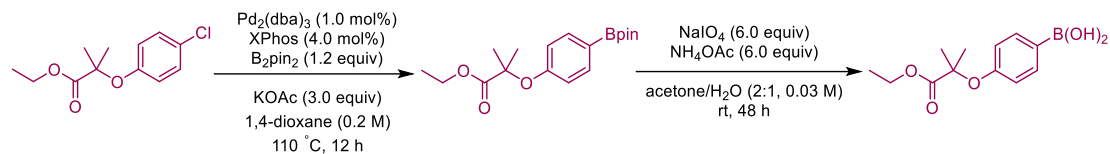

Under the  $\text{N}_2$  atmosphere,  $\text{Pd}_2(\text{dba})_3$  (27.5 mg, 0.03 mmol, 1.0 mol%), XPhos (57.2 mg, 0.12 mmol, 4.0 mol%),  $\text{B}_2\text{pin}_2$  (914.2 mg, 3.6 mmol, 1.20 equiv), KOAc (883.3 mg, 9 mmol), dry 1,4-dioxane (15 ml) and clofibrate (728.1 g, 3 mmol) were added to a schlenk tube. The mixture was stirred at  $110^\circ\text{C}$  for 12 h, then allowed to cool to room temperature, and extracted with  $\text{H}_2\text{O}$  and EA. The combined organic layer was washed with saturated brine, dried over  $\text{Na}_2\text{SO}_4$ , and concentrated under reduced pressure. The crude residue was purified by flash column chromatography to afford the clofibrate boronic ester. Then, the boronic ester (3 mmol, 1.0 equiv),  $\text{NaIO}_4$  (3.85 g, 18 mmol) and  $\text{NH}_4\text{OAc}$  (1.39 g, 18 mmol) were dissolved in a mixed solvent of acetone/ $\text{H}_2\text{O}$  (v/v = 2:1, 100 ml) under magnetic stirred at room temperature for 48 h, followed by extraction with EA and saturated brine. The combined organic layer was concentrated under reduced pressure to yield the clofibrate boronic acid.

All of the NMR spectra of the know compounds were in full accordance with the data in the literatures.

## 3. Synthesis of Oxime, Amide and Isoxazole

These were prepared by previously reported procedures.<sup>4</sup>

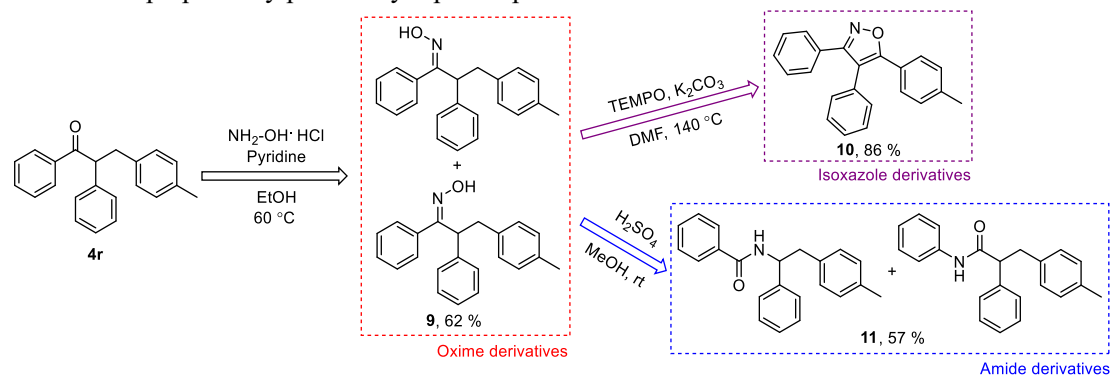

**Synthesis of 1,2-diphenyl-3-(p-tolyl)propan-1-one oxime (9):** To a solution of **4r** (300.4 mg, 1 mmol, 1 equiv) in EtOH (0.5 ml) was added hydroxylamine hydrochloride (104.2 mg, 1.5 mmol) and pyridine (197.7 mg, 2.5 mmol) under a  $\text{N}_2$  atmosphere. The reaction mixture was then stirred at  $60^\circ\text{C}$  for 12 h. The solvent was evaporated, and extracted with  $\text{H}_2\text{O}$  and EA. The combined organic layers were washed with 1 N aqueous HCl and brine, dried over  $\text{Na}_2\text{SO}_4$ , and concentrated. The crude product was purified by column chromatography to give **9** in 62% yield.

**3,4-diphenyl-5-(p-tolyl)isoxazole (10):** **9** (47.3 mg, 0.15 mmol, 1 equiv), TEMPO (70.4 mg, 0.45 mmol) and  $\text{K}_2\text{CO}_3$  (41.4 mg, 0.3 mmol) were dissolved in DMF (1.5 mL). The reaction mixture was then stirred for 24 h at  $140^\circ\text{C}$  under a  $\text{N}_2$  atmosphere. The resulting mixture was cooled to room temperature and extracted with  $\text{H}_2\text{O}$  and EA. The combined organic extracts were washed

with brine, dried over Na<sub>2</sub>SO<sub>4</sub>, and concentrated. The crude product was purified by column chromatography to give **10** in 86% yield.

**N-(1-phenyl-2-(p-tolyl)ethyl)benzamide and N,2-diphenyl-3-(p-tolyl)propenamide (11):** **9** (31.5 mg, 0.1 mmol) was dissolved in MeOH (0.5 ml). H<sub>2</sub>SO<sub>4</sub> (0.5 ml) was added slowly to the above solution at room temperature and stirred 12 hours at room temperature. After completion of the reaction, the reaction mixture was slowly poured into 10 mL of ice water. Then, using Na<sub>2</sub>CO<sub>3</sub> to adjust the pH to neutral and extracted with EA. The combined organic extracts were washed with brine, dried over Na<sub>2</sub>SO<sub>4</sub>, and concentrated. The crude product was purified by column chromatography to give N-(1-phenyl-2-(p-tolyl)ethyl)benzamide and N,2-diphenyl-3-(p-tolyl)propenamide in 57% yield.

#### 4. General Procedure for Synthesis of Pzproducts 4/5/6

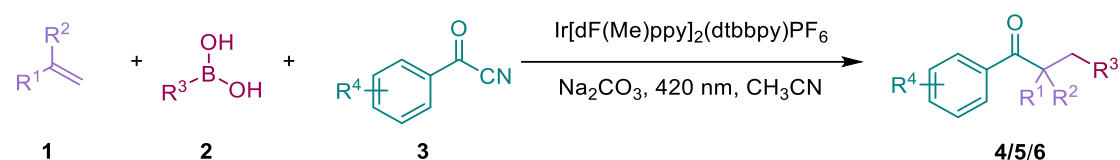

CH<sub>3</sub>CN (2.0 mL) was added to a 4 mL transparent glass bottle with magnetic stirring bars and rubber plugs, then Ir[dF(Me)ppy]<sub>2</sub>(dtbbpy)PF<sub>6</sub> (1.2 mol%), alkene **1** (0.8 mmol, 4.0 equiv), boronic acid **2** (0.6 mmol, 3.0 equiv), Benzoyl cyanide **3** (0.2 mmol, 1.0 equiv), Na<sub>2</sub>CO<sub>3</sub> (0.4 mmol, 2.0 equiv) were added to the bottle. The reaction mixture was irradiated with 3 W blue LEDs (420 nm, 100% intensity) for 24 hours at ambient temperature. After the reaction (monitored by TLC), The crude mixture was subjected to column chromatography on silica gel (eluted with PE:EA = 30:1). The combined eluents were subjected to anhydrous magnesium sulfate drying, vacuum concentration, and purification to obtain the desired product **4/5/6**.

#### 5. Optimization Experiments

**Table S1. Screen of ratio**

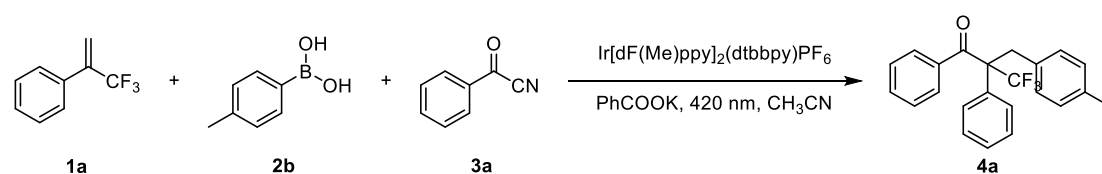

| Entry | 1a (mmol) | 2b (mmol) | 3a (mmol) | PhCOOK | 4a Yield (%) |
|-------|-----------|-----------|-----------|--------|--------------|
| 1     | 0.2       | 0.6       | 0.2       | 0.4    | 32           |
| 2     | 0.4       | 0.6       | 0.2       | 0.4    | 42           |
| 3     | 0.6       | 0.6       | 0.2       | 0.4    | 44           |
| 4     | 0.8       | 0.6       | 0.2       | 0.4    | <b>48</b>    |
| 5     | 1.0       | 0.6       | 0.2       | 0.4    | 48           |
| 6     | 0.8       | 0.7       | 0.2       | 0.4    | 48           |
| 7     | 0.8       | 0.5       | 0.2       | 0.4    | 44           |

Reaction conditions: Ir[dF(Me)ppy]<sub>2</sub>(dtbbpy)PF<sub>6</sub> (1.2 mol%), CH<sub>3</sub>CN (2 mL), room temperature, 3

W blue LEDs, 18 h. Isolated yield.

**Table S2. Screen of Photocatalyst**

| Entry | Photocatalyst                                                 | 4a Yield (%) |
|-------|---------------------------------------------------------------|--------------|
| 1     | Mes-Acr <sup>+</sup> PF <sub>6</sub> <sup>-</sup>             | NR           |
| 2     | Ir[dF(Me)ppy] <sub>2</sub> (dtbbpy)PF <sub>6</sub>            | <b>48</b>    |
| 3     | [Ir(dtbbpy)(ppy) <sub>2</sub> ]PF <sub>6</sub>                | 11           |
| 4     | Ir[dF(CF <sub>3</sub> )ppy] <sub>2</sub> (bpy)PF <sub>6</sub> | 24           |
| 5     | Ir(ppy) <sub>3</sub>                                          | NR           |
| 6     | Ru(bpy) <sub>3</sub> (PF <sub>6</sub> ) <sub>2</sub>          | NR           |
| 7     | 4CzIPN                                                        | 43           |
| 8     | Eosin Y                                                       | NR           |
| 9     | 3DPA2FBN                                                      | 13           |

Reaction conditions: **1a** (4 equiv), **2b** (3 equiv), **3a** (0.2 mmol, 1 equiv), PhCOOK (2 equiv), photocatalyst (1.2 mol%), CH<sub>3</sub>CN (2 mL), room temperature, 3 W blue LEDs, 18 h. Isolated yield.

**Table S3. Screen of Solvent**

| Entry | Solvent            | 4a Yield (%) |
|-------|--------------------|--------------|
| 1     | CH <sub>3</sub> CN | <b>48</b>    |
| 2     | DMF                | Trace        |
| 3     | 1,4-dioxane        | 25           |
| 4     | THF                | 18           |
| 5     | DMSO               | NR           |
| 6     | NMP                | NR           |
| 7     | Tol                | 24           |
| 8     | DCM                | 38           |
| 9     | EA                 | 34           |
| 10    | EtOH               | Trace        |
| 11    | Cyclohexane        | Trace        |
| 12    | MTBE               | Trace        |
| 13    | MCB                | 35           |
| 14    | Acetone            | 39           |

Reaction conditions: **1a** (4 equiv), **2b** (3 equiv), **3a** (0.2 mmol, 1 equiv), PhCOOK (2 equiv), Ir[dF(Me)ppy]<sub>2</sub>(dtbbpy)PF<sub>6</sub> (1.2 mol%), solvent (2 mL), room temperature, 3 W blue LEDs, 18 h.

Isolated yield.

**Table S4. Screen of Base**

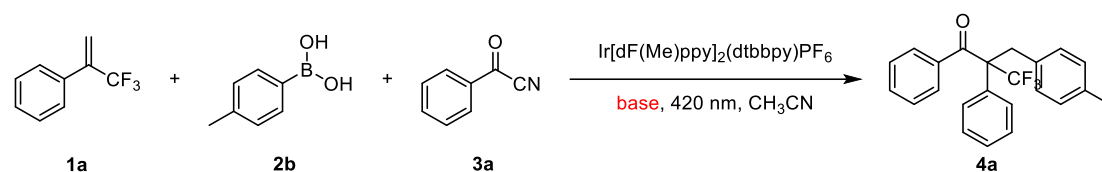

| Entry | Base                     | 4a Yield (%) |
|-------|--------------------------|--------------|
| 1     | $\text{Cs}_2\text{CO}_3$ | Trace        |
| 2     | $\text{CsOAc}$           | 30           |
| 3     | $\text{K}_2\text{CO}_3$  | 36           |
| 4     | $\text{K}_3\text{PO}_4$  | Trace        |
| 5     | $\text{KOAc}$            | 35           |
| 6     | $\text{KOH}$             | 29           |
| 7     | $\text{Na}_2\text{CO}_3$ | <b>58</b>    |
| 8     | $\text{NaOH}$            | 40           |
| 9     | $\text{PhCOOK}$          | 48           |

Reaction conditions: **1a** (4 equiv), **2b** (3 equiv), **3a** (0.2 mmol, 1 equiv), base (2 equiv),  $\text{Ir}[\text{dF}(\text{Me})\text{ppy}]_2(\text{dtbbpy})\text{PF}_6$  (1.2 mol%),  $\text{CH}_3\text{CN}$  (2 mL), room temperature, 3 W blue LEDs, 18 h. Isolated yield.

## 6. Gram-Scale Reaction

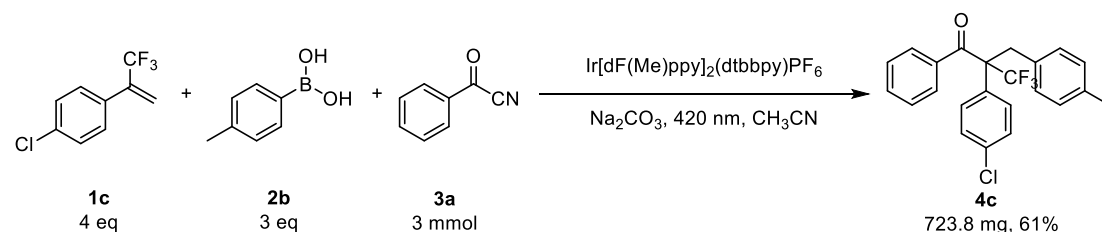

In a 250 ml round bottom flask, **1c** (2.5 g, 12 mmol), **2b** (1.2 g, 9 mmol), **3a** (393.4 mg, 3 mmol),  $\text{Na}_2\text{CO}_3$  (635.9 g, 6 mmol) and  $\text{Ir}[\text{dF}(\text{Me})\text{ppy}]_2(\text{dtbbpy})\text{PF}_6$  (1.2 mol%) were dissolved in  $\text{CH}_3\text{CN}$  (30 ml). The reactants were mixed evenly and then irradiated with a 30 W blue LEDs for 24 h. After the reaction, it was then extracted with ethyl acetate (3×100 mL), and the combined organic extract was washed with saline (100 mL), dried with anhydrous sodium sulfate and concentrated in vacuo. The crude mixture was directly purified by column chromatography on silica gel (PE:EA = 30:1) by flash column chromatography to obtain the desired product **4c** (723.8 mg, 61%).

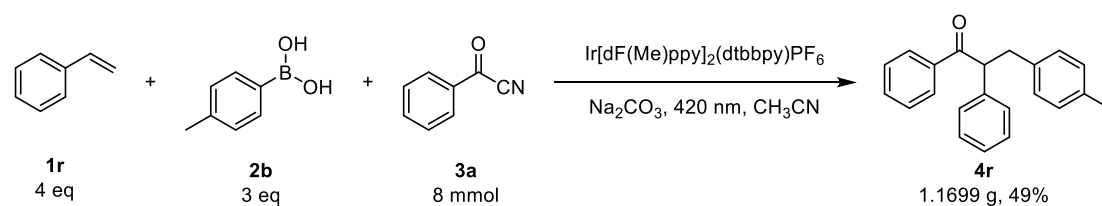

In a 250 ml round bottom flask, **1r** (3.3 g, 32 mmol), **2b** (3.3 g, 24 mmol), **3a** (1.0 g, 8 mmol), Na<sub>2</sub>CO<sub>3</sub> (1.7 g, 16 mmol) and Ir[dF(Me)ppy]<sub>2</sub>(dtbbpy)PF<sub>6</sub> (1.2 mol%) were dissolved in CH<sub>3</sub>CN (80 ml). The reactants were mixed evenly and then irradiated with a 30 W blue LEDs for 24 h. After the reaction, it was then extracted with ethyl acetate (3×100 mL), and the combined organic extract was washed with saline (100 mL), dried with anhydrous sodium sulfate and concentrated in vacuo. The crude mixture was directly purified by column chromatography on silica gel (PE:EA = 30:1) by flash column chromatography to obtain the desired product **4r** (1.1699 g, 49%).

## 7. Mechanism Studies

### 7.1 TEMPO trapping experiment

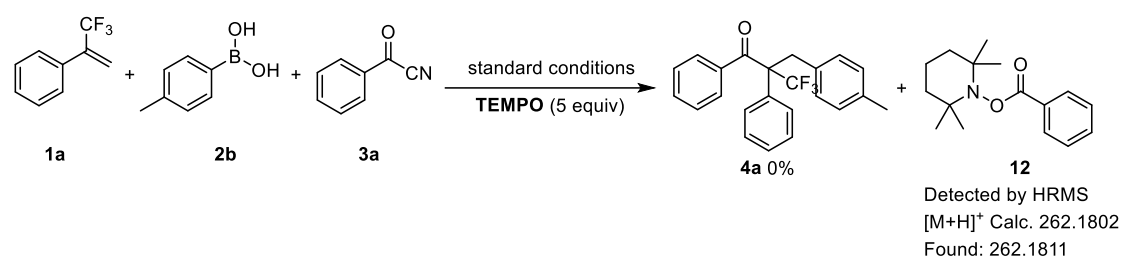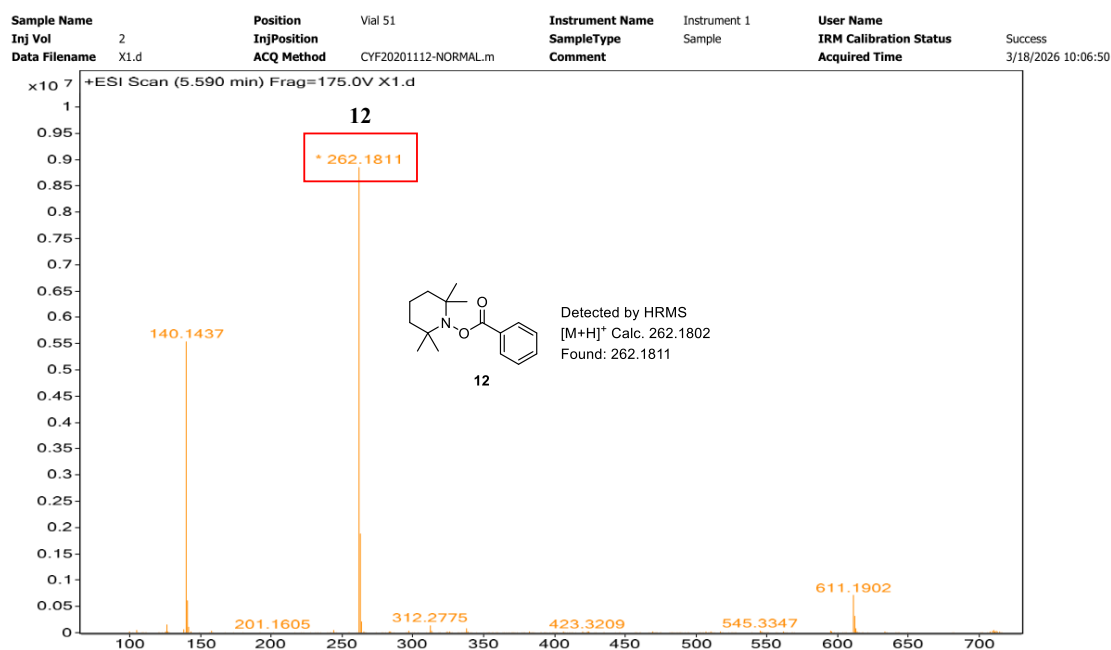

**Figure S3. TEMPO trapping experiment**

CH<sub>3</sub>CN (2.0 mL) was added to a 4 mL transparent glass bottle with magnetic stirring bars and rubber plugs, then, **TEMPO** (1.0 mmol, 5.0 equiv), **1a** (0.8 mmol, 4.0 equiv), **2b** (0.6 mmol, 3.0 equiv), **3a** (0.2 mmol, 1.0 equiv), Na<sub>2</sub>CO<sub>3</sub> (0.4 mmol, 2.0 equiv) and Ir[dF(Me)ppy]<sub>2</sub>(dtbbpy)PF<sub>6</sub> (1.2 mol%) were added to the bottle. The reaction mixture was irradiated with 3 W blue LEDs (420 nm, 100% intensity) for 18 hours at ambient temperature. TLC analysis indicates that no product **4a**, and the TEMPO-trapped products **12** were obtained by HRMS.

## 7.2 BHT trapping experiment

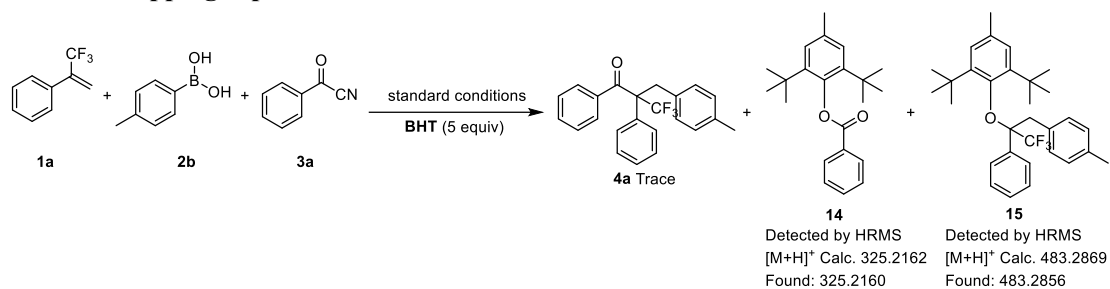

| Sample Name   | Position | Vial 52     | Instrument Name | Instrument 1 | User Name              |
|---------------|----------|-------------|-----------------|--------------|------------------------|
| Inj Vol       | 2        | InjPosition | SampleType      | Sample       | IRM Calibration Status |
| Data Filename | X2.d     | ACQ Method  | Comment         |              | Acquired Time          |

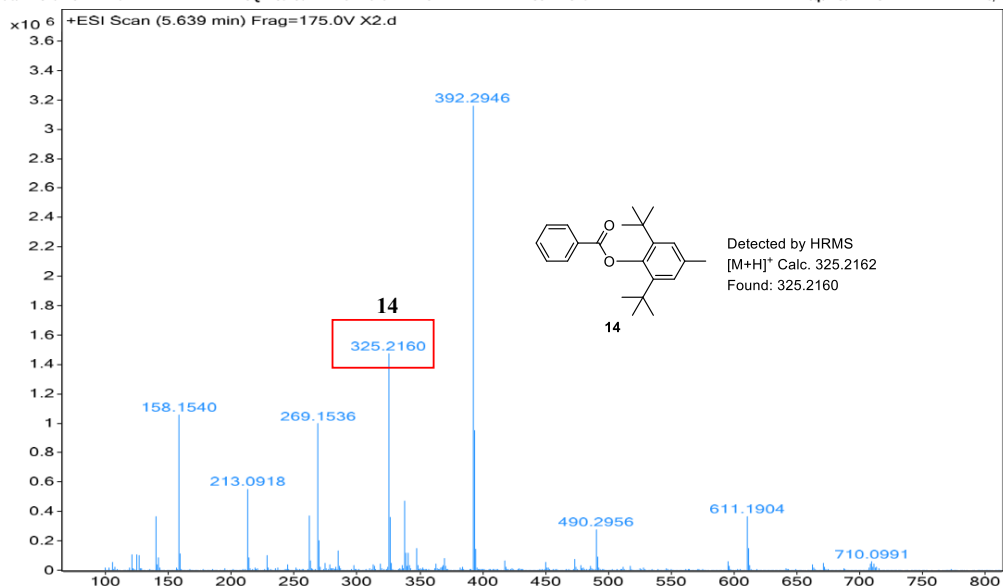

| Sample Name   | Position | Vial 52     | Instrument Name | Instrument 1 | User Name              |
|---------------|----------|-------------|-----------------|--------------|------------------------|
| Inj Vol       | 2        | InjPosition | SampleType      | Sample       | IRM Calibration Status |
| Data Filename | X2.d     | ACQ Method  | Comment         |              | Acquired Time          |

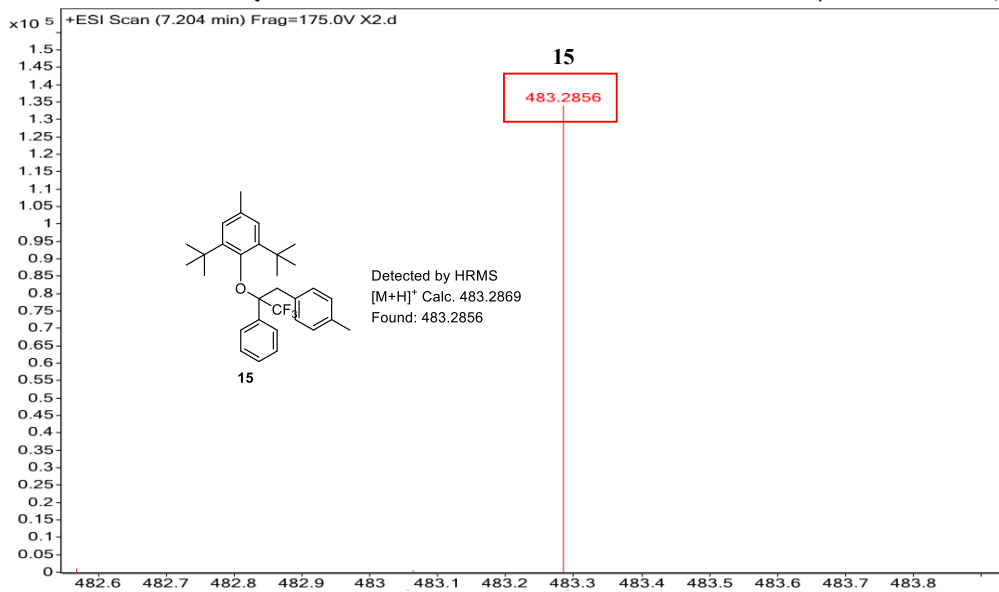

**Figure S4. BHT trapping experiment**

CH<sub>3</sub>CN (2.0 mL) was added to a 4 mL transparent glass bottle with magnetic stirring bars and rubber plugs, then, **BHT** (1.0 mmol, 5.0 equiv), **1a** (0.8 mmol, 4.0 equiv), **2b** (0.6 mmol, 3.0 equiv),

**3a** (0.2 mmol, 1.0 equiv), Na<sub>2</sub>CO<sub>3</sub> (0.4 mmol, 2.0 equiv) and Ir[dF(Me)ppy]<sub>2</sub>(dtbbpy)PF<sub>6</sub> (1.2 mol%) were added to the bottle. The reaction mixture was irradiated with 3 W blue LEDs (420 nm, 100% intensity) for 18 hours at ambient temperature. After the reaction (monitored by TLC), TLC analysis indicates that **4a** was trace, and the BHT-trapped products **13** and **14** were obtained by HRMS.

## 8. Light on/off experiments

Six standard reaction mixtures were charged with **1a** (0.2 mmol, 1 equiv.), **2b** (0.6 mmol, 3 equiv.), **3a** (0.8 mmol, 4 equiv.) and Ir[dF(Me)ppy]<sub>2</sub>(dtbbpy)PF<sub>6</sub> (1.2 mol%). The reaction mixture was irradiated with 3 W blue LEDs. After 15 min, the lamps were turned off, and one vial was removed from the irradiation setup for analysis. The remaining five vials were stirred in the absence of light for an additional 15 min. Then, one vial was removed for analysis, and the lamps were turned back on to irradiate the remaining for reaction mixtures. Carry out this repetitive operation until the last vial was reached. The reaction mixtures were analyzed by HPLC.

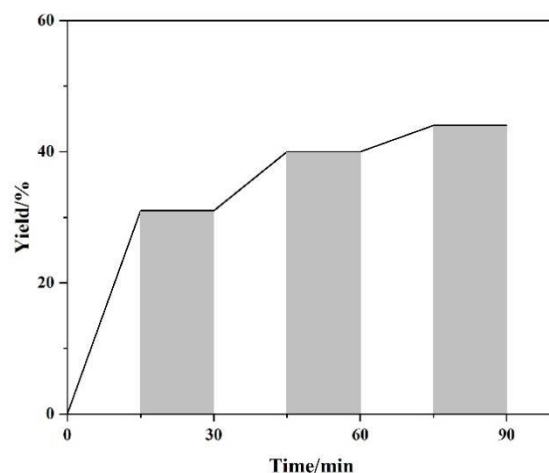

Figure S5. Light on/off experiments

## 9. Stern-Volmer emission quenching experiments

Emission quenching experiments were recorded using a Techcomp FL-970 Fluorescence Spectrometer. Ir[dF(Me)ppy]<sub>2</sub>(dtbbpy)PF<sub>6</sub> solutions were excited at 400 nm and the emission intensity at 517 nm was observed. Prepare a  $5 \times 10^{-5}$  M CH<sub>3</sub>CN solution of Ir[dF(Me)ppy]<sub>2</sub>(dtbbpy)PF<sub>6</sub>. Then an appropriate amount of quencher was added to the measured solution and the emission spectrum of the sample was collected.

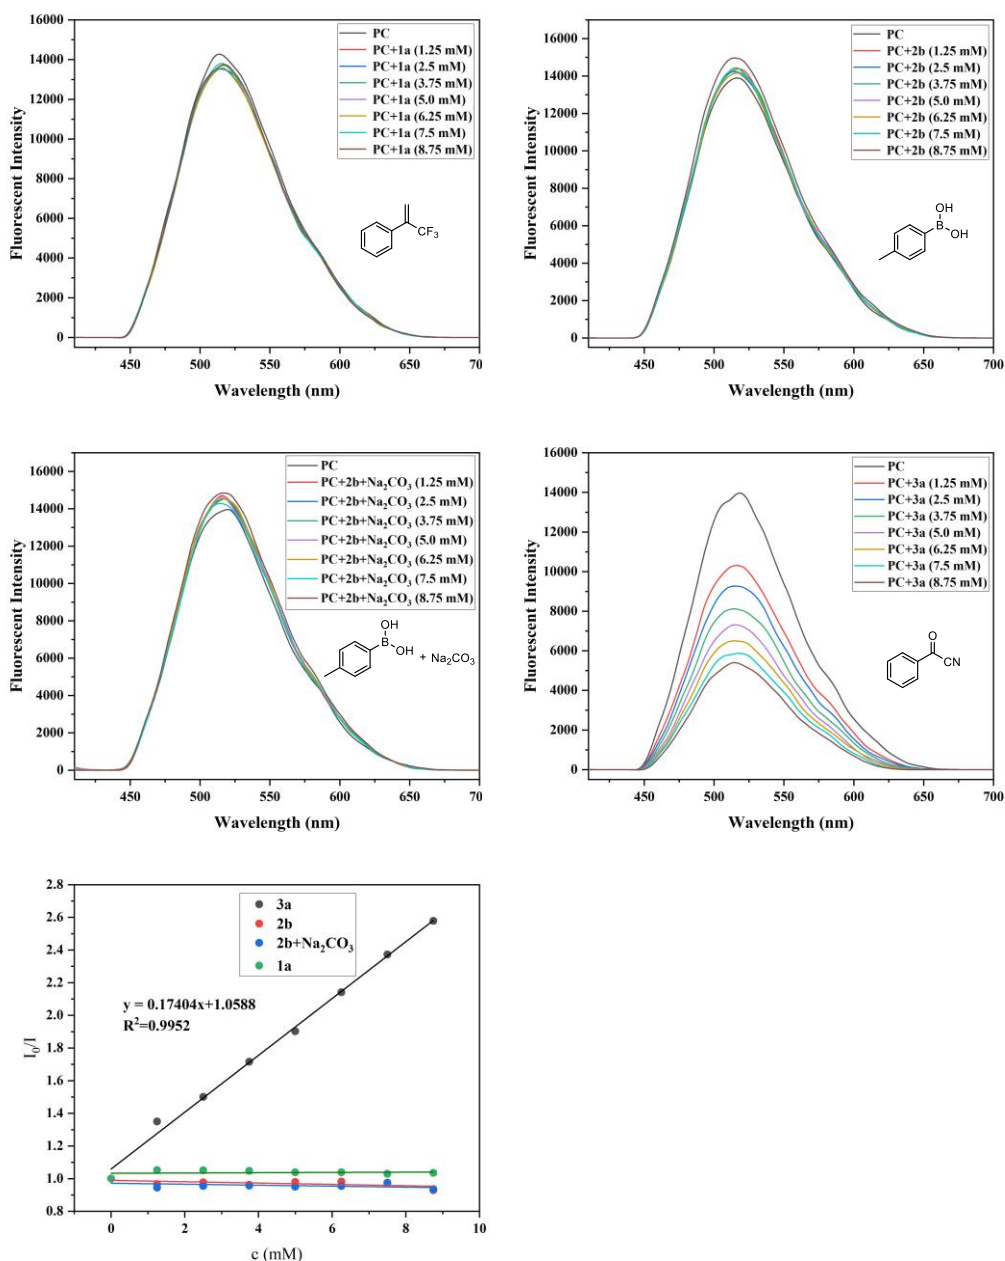

Figure S6. Ir[dF(Me)ppy]<sub>2</sub>(dtbbpy)PF<sub>6</sub> emission quenching experiment by 1a, 2b, 2b+Na<sub>2</sub>CO<sub>3</sub>, 3a.

## 10. DFT Calculations

Density functional theory (DFT) calculations were carried out using Gaussian 09 program.<sup>5</sup> Geometrical optimization calculations were carried out at the PBE0-D3(BJ)<sup>6,7</sup>/def2-TZVP<sup>8</sup> level with the SMD continuum solvent model<sup>9</sup> for acetonitrile without any symmetry assumptions unless otherwise stated. Harmonic vibration frequency calculations were performed at the same level for verifying the resulting geometries as local minima (with all the frequencies real) or saddle points (with only one imaginary frequency).

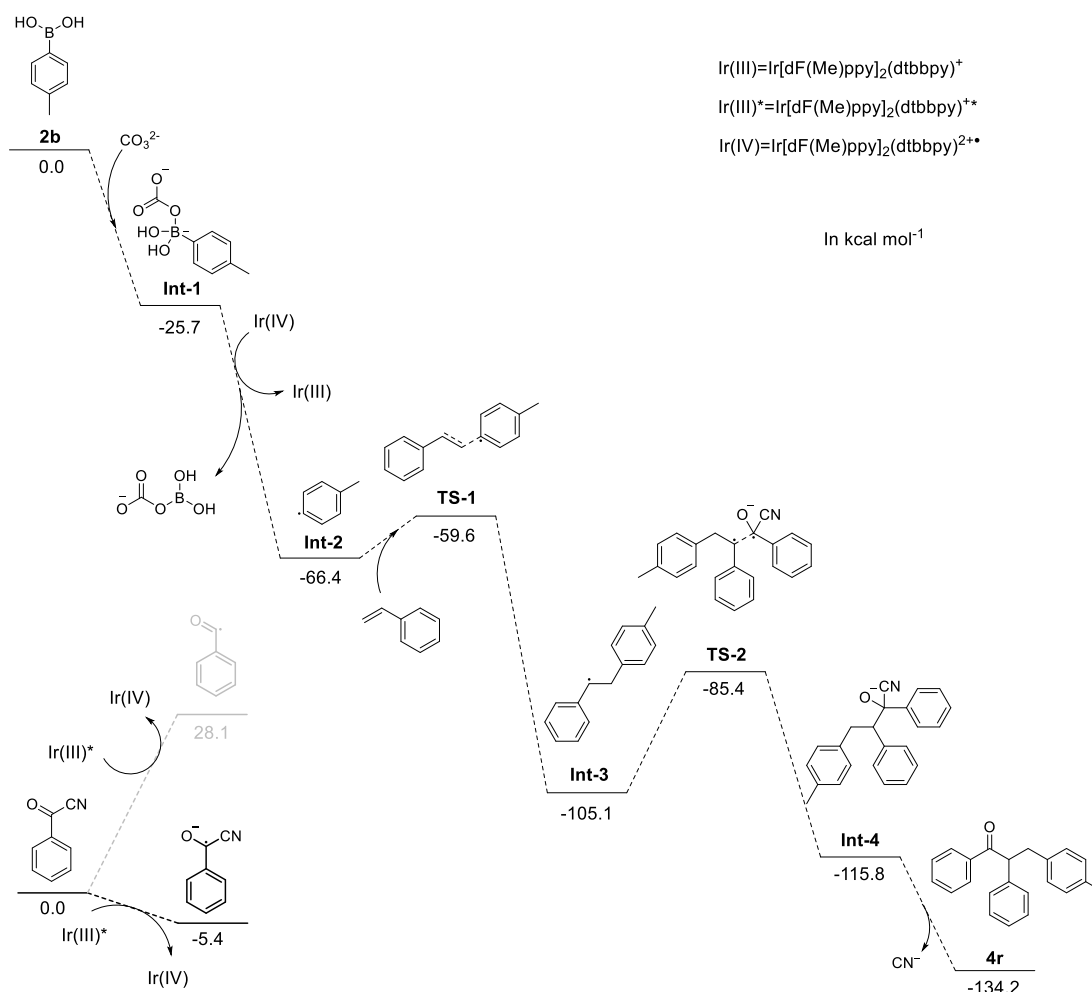

**Figure S7.** Energy profile of the reaction. Proposed reaction pathway. The Gibbs free energies were calculated at the PBE0-D3(BJ)/def2-TZVP level with the SMD continuum solvent model for acetonitrile.

DFT calculations indicate that the reaction is initiated by base-assisted formation of a boronate intermediate, followed by single-electron transfer (SET) with the photoexcited Ir(III)\* species to generate an aryl radical. Using Na<sub>2</sub>CO<sub>3</sub> as the base, this process is highly exergonic (**Int-1**, -25.7 kcal mol<sup>-1</sup>; **Int-2**, -66.4 kcal mol<sup>-1</sup>), facilitating efficient radical generation. The resulting aryl radical undergoes addition to the alkene via **TS-1** ( $\Delta G^\ddagger = 6.8$  kcal mol<sup>-1</sup>) to afford **Int-3** (-105.1 kcal mol<sup>-1</sup>). In parallel, the reduced photocatalyst converts the benzoyl cyanide substrate into its corresponding radical anion (the energy to form the acyl radical from benzoyl cyanide was much higher than that for the acyl cyanide anion radical), which subsequently couples with **Int-3** through **TS-2** to form **Int-4**. Finally, spontaneous cyanide extrusion from **Int-4** delivers the desired product, rendering the overall reaction highly thermo-dynamically favorable.

### Energies of Stationary Points

Supplementary Table S5. Electronic energies (*EE*), thermal corrections to Gibbs free energies (*G<sub>corr</sub>*), and Gibbs free energies (*G*) of the stationary points calculated at the PBE0-D3(BJ)/def2-TZVP level of theory with the SMD continuum solvent model for acetonitrile.

**Table S5**

|                                    | $G_{corr}(\text{Ha})$ | $EE(\text{Ha})$ | $G(\text{Ha})$ |
|------------------------------------|-----------------------|-----------------|----------------|
| <b>2b</b>                          | 0.117620              | -447.267329     | -447.149709    |
| <b>CO<sub>3</sub><sup>2-</sup></b> | -0.011364             | -263.845662     | -263.857026    |
| <b>Int-1</b>                       | 0.125449              | -711.173154     | -711.047705    |
| <b>-OCOO-B(OH)<sub>2</sub></b>     | 0.020507              | -440.348826     | -440.328318    |
| <b>Int-2</b>                       | 0.085344              | -270.662533     | -270.577190    |
| <b>1r</b>                          | 0.102549              | -309.400646     | -309.298097    |
| <b>TS-1</b>                        | 0.202097              | -580.066461     | -579.864364    |
| <b>Int-3</b>                       | 0.207999              | -580.144883     | -579.936884    |
| <b>PhCOCN<sup>•</sup></b>          | 0.072665              | -437.604428     | -437.531762    |
| <b>TS-2</b>                        | 0.303396              | -1017.740747    | -1017.437351   |
| <b>Int-4</b>                       | 0.311018              | -1017.796693    | -1017.485675   |
| <b>CN<sup>-</sup></b>              | -0.014051             | -92.880289      | -92.894340     |
| <b>4r</b>                          | 0.304872              | -924.925642     | -924.620770    |
| <b>PhCOCN</b>                      | 0.075074              | -437.484821     | -437.409746    |
| <b>PhCO<sup>•</sup></b>            | 0.066550              | -344.665382     | -344.598832    |
| <b>Ir(III)</b>                     | 0.649236              | -2345.786293    | -2345.137057   |
| <b>Ir(III)*</b>                    | 0.643968              | -2345.689905    | -2345.045938   |
| <b>Ir(IV)</b>                      | 0.646358              | -2345.578772    | -2344.932414   |

Cartesian coordinates of the optimized geometries

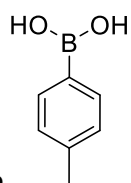

**2b**

|   |             |             |             |
|---|-------------|-------------|-------------|
| C | 0.06580700  | 1.19521700  | -0.01573500 |
| C | 1.45324100  | 1.19820800  | -0.01735600 |
| C | 2.17127500  | 0.00516700  | -0.00032400 |
| C | 1.45480900  | -1.19272600 | 0.01664400  |
| C | 0.07067400  | -1.19303000 | 0.01548300  |
| C | -0.65768000 | 0.00144900  | 0.00005200  |
| C | 3.66747800  | -0.00145000 | 0.00045000  |
| B | -2.21945900 | -0.00109300 | 0.00040400  |
| O | -2.86765800 | 1.20265800  | 0.03435600  |
| O | -2.86297600 | -1.20732500 | -0.03396700 |
| H | -0.46642100 | 2.14079300  | -0.02873700 |
| H | 1.99174200  | 2.14084500  | -0.03152600 |
| H | 1.99542700  | -2.13453900 | 0.03080100  |
| H | -0.46026400 | -2.13933700 | 0.02856600  |
| H | 4.06903000  | 1.01307600  | -0.00591100 |
| H | 4.05605100  | -0.51759600 | 0.88327900  |
| H | 4.05735700  | -0.52910800 | -0.87493900 |
| H | -3.82930500 | 1.14347000  | 0.02736600  |
| H | -3.82486800 | -1.15180500 | -0.02931900 |

**CO<sub>3</sub><sup>2-</sup>**

|   |             |             |            |
|---|-------------|-------------|------------|
| C | 0.00000000  | 0.00025100  | 0.00000000 |
| O | -1.25625600 | 0.30202200  | 0.00000000 |
| O | 0.89033600  | 0.93531700  | 0.00000000 |
| O | 0.36592000  | -1.23752700 | 0.00000000 |

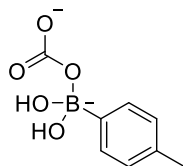

**Int-1**

|   |            |             |             |
|---|------------|-------------|-------------|
| O | 3.04387400 | -2.13254800 | -0.23476100 |
| C | 2.50959300 | -1.10696400 | 0.23972900  |
| O | 2.10432100 | -0.17767100 | -0.65036400 |
| O | 2.34054400 | -0.87859500 | 1.47606300  |
| B | 1.23080900 | 1.00556800  | -0.28484000 |
| O | 1.71201000 | 1.62503300  | 0.94588300  |
| O | 1.29726900 | 1.96170200  | -1.39604200 |

|   |             |             |             |
|---|-------------|-------------|-------------|
| C | -0.32848900 | 0.49440500  | -0.17656100 |
| C | -0.78268200 | -0.69701300 | -0.74516500 |
| C | -2.10758300 | -1.11546400 | -0.64671600 |
| C | -3.05283300 | -0.35202500 | 0.03173300  |
| C | -2.61980600 | 0.84514500  | 0.60345100  |
| C | -1.29487800 | 1.24795200  | 0.49986200  |
| C | -4.47646700 | -0.80321800 | 0.16589700  |
| H | 1.99379700  | 0.83345600  | 1.45256500  |
| H | 2.16099500  | 2.38052200  | -1.34715100 |
| H | -0.06957000 | -1.32553500 | -1.27271900 |
| H | -2.41500700 | -2.05427500 | -1.10158500 |
| H | -3.33466700 | 1.46408800  | 1.14127300  |
| H | -0.99220500 | 2.17930900  | 0.97278700  |
| H | -4.68085100 | -1.66345500 | -0.47507200 |
| H | -4.70552100 | -1.09595700 | 1.19605300  |
| H | -5.17629100 | -0.00627400 | -0.10157500 |

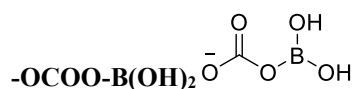

|   |             |             |             |
|---|-------------|-------------|-------------|
| O | -2.25189000 | -0.87009700 | 0.00040200  |
| C | -1.30055700 | -0.09978300 | -0.00004800 |
| O | -0.03863400 | -0.73310600 | -0.00050700 |
| O | -1.29404100 | 1.15553200  | -0.00020000 |
| B | 1.15773600  | -0.03186100 | -0.00001500 |
| O | 1.21668600  | 1.31870000  | 0.00024000  |
| O | 2.32141000  | -0.75901800 | 0.00014300  |
| H | 0.24302400  | 1.56647900  | -0.00013800 |
| H | 2.14339200  | -1.70456100 | -0.00011400 |

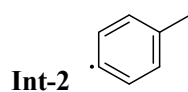

|   |             |             |             |
|---|-------------|-------------|-------------|
| C | 0.13402800  | -1.19923000 | -0.00000400 |
| C | -1.25968300 | -1.22163600 | 0.00000100  |
| C | -1.89074200 | -0.00519200 | 0.00000400  |
| C | -1.27129700 | 1.21425200  | 0.00000100  |
| C | 0.12562900  | 1.20315800  | -0.00000400 |
| C | 0.83863700  | 0.00617400  | -0.00000600 |
| C | 2.33726000  | 0.00416900  | 0.00000400  |
| H | 0.68061700  | -2.13797800 | -0.00001000 |
| H | -1.80118700 | -2.16143200 | 0.00000300  |
| H | -1.81986100 | 2.14997900  | -0.00000100 |
| H | 0.66496600  | 2.14566200  | -0.00000700 |
| H | 2.73292000  | 1.02089700  | -0.00017700 |

|   |            |             |             |
|---|------------|-------------|-------------|
| H | 2.72977200 | -0.51348900 | 0.87974900  |
| H | 2.72978600 | -0.51381400 | -0.87954200 |

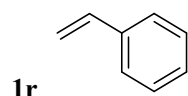

|   |             |             |             |
|---|-------------|-------------|-------------|
| C | 0.01483800  | 1.08555600  | -0.00000500 |
| C | -1.34824100 | 1.32407700  | -0.00000200 |
| C | -2.24900000 | 0.26370900  | 0.00000400  |
| C | -1.77154000 | -1.03866800 | 0.00000400  |
| C | -0.40492700 | -1.27674400 | 0.00000000  |
| C | 0.51114800  | -0.22237500 | -0.00000400 |
| C | 1.94273400  | -0.53302800 | -0.00000700 |
| C | 2.95100400  | 0.33730200  | 0.00000900  |
| H | 0.70179400  | 1.92440800  | -0.00001100 |
| H | -1.71410900 | 2.34509600  | -0.00000400 |
| H | -3.31626000 | 0.45513500  | 0.00000600  |
| H | -2.46415500 | -1.87323300 | 0.00000800  |
| H | -0.03290600 | -2.29648100 | 0.00000100  |
| H | 2.17426900  | -1.59619800 | -0.00002000 |
| H | 3.97827500  | -0.00930400 | 0.00000600  |
| H | 2.79700300  | 1.41160600  | 0.00002500  |

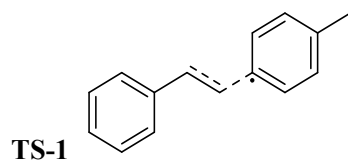

|   |             |             |             |
|---|-------------|-------------|-------------|
| C | 2.76449500  | 1.46507700  | 0.41770500  |
| C | 3.83099400  | 0.56394900  | 0.37768400  |
| C | 3.66416900  | -0.72994900 | -0.11141400 |
| C | 2.40427500  | -1.11983600 | -0.56937800 |
| C | 1.32318500  | -0.24103100 | -0.54108600 |
| C | 1.55751400  | 1.01626500  | -0.04711700 |
| C | -0.77883500 | 2.47321000  | 0.26877900  |
| C | -1.65698400 | 1.82895700  | -0.50689600 |
| C | -2.41076800 | 0.62880800  | -0.15360300 |
| C | -2.24007000 | -0.04487900 | 1.06150900  |
| C | -2.97012100 | -1.18529900 | 1.34609700  |
| C | -3.88699100 | -1.68309200 | 0.42554500  |
| C | -4.06457900 | -1.02821800 | -0.78491100 |
| C | -3.33207200 | 0.11424000  | -1.07023200 |
| C | 4.81056000  | -1.69509000 | -0.13708900 |
| H | 2.90468200  | 2.47080800  | 0.80059300  |
| H | 4.80797200  | 0.87796100  | 0.73365800  |

|   |             |             |             |
|---|-------------|-------------|-------------|
| H | 2.26398300  | -2.12592900 | -0.95480400 |
| H | 0.34606000  | -0.55052500 | -0.89729900 |
| H | -0.58537800 | 2.18366200  | 1.29547300  |
| H | -0.27269200 | 3.36146000  | -0.09070600 |
| H | -1.83139200 | 2.19878900  | -1.51478800 |
| H | -1.52401000 | 0.32382100  | 1.78730200  |
| H | -2.82224700 | -1.69477200 | 2.29215600  |
| H | -4.45584600 | -2.57796600 | 0.65211700  |
| H | -4.77453500 | -1.40897500 | -1.51102600 |
| H | -3.47000100 | 0.62369200  | -2.01880000 |
| H | 5.74984700  | -1.19922400 | 0.11306200  |
| H | 4.65690300  | -2.50558200 | 0.58198500  |
| H | 4.91802200  | -2.15589500 | -1.12246900 |

**Int-3**

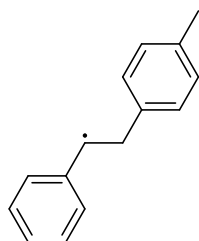

|   |             |             |             |
|---|-------------|-------------|-------------|
| C | -2.30187100 | 1.09561200  | 0.81239900  |
| C | -3.63831300 | 0.71514700  | 0.86126600  |
| C | -4.14496100 | -0.24374500 | -0.00873200 |
| C | -3.26709400 | -0.81115100 | -0.93403700 |
| C | -1.93616000 | -0.43264100 | -0.98320500 |
| C | -1.43050700 | 0.52948800  | -0.10905500 |
| C | 0.01938400  | 0.91828900  | -0.15703000 |
| C | 0.93177000  | -0.16576900 | 0.30292500  |
| C | 2.33319200  | -0.14063700 | 0.15948400  |
| C | 3.01881300  | 0.93624600  | -0.45354000 |
| C | 4.39456100  | 0.92429200  | -0.57374100 |
| C | 5.14125800  | -0.14948800 | -0.09342300 |
| C | 4.48729600  | -1.22102700 | 0.51550800  |
| C | 3.11455000  | -1.21998400 | 0.64160400  |
| C | -5.58331600 | -0.65824600 | 0.03677600  |
| H | -1.93166200 | 1.84676300  | 1.50350200  |
| H | -4.29891300 | 1.17347600  | 1.59084800  |
| H | -3.63693400 | -1.56009800 | -1.62818200 |
| H | -1.27473400 | -0.88853700 | -1.71408800 |
| H | 0.28479300  | 1.21199300  | -1.18127000 |
| H | 0.17211900  | 1.82038000  | 0.45145700  |
| H | 0.49255700  | -1.02310000 | 0.80381600  |
| H | 2.45640300  | 1.78191500  | -0.83221300 |
| H | 4.89734300  | 1.76105400  | -1.04710300 |

|   |             |             |             |
|---|-------------|-------------|-------------|
| H | 6.22079500  | -0.15202800 | -0.19174900 |
| H | 5.06142300  | -2.06072200 | 0.89253300  |
| H | 2.60971800  | -2.05539700 | 1.11641100  |
| H | -6.12508600 | -0.11998500 | 0.81634000  |
| H | -6.08049700 | -0.46411100 | -0.91819800 |
| H | -5.67893700 | -1.72993000 | 0.23470300  |

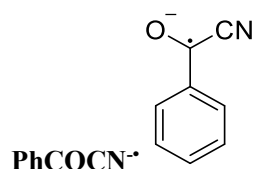

|   |             |             |             |
|---|-------------|-------------|-------------|
| C | -1.80173900 | -1.43429300 | 0.00540100  |
| C | -2.75557700 | -0.41587000 | -0.00285000 |
| C | -2.32704300 | 0.90849100  | -0.00800600 |
| C | -0.97748700 | 1.21554200  | -0.00482700 |
| C | -0.00417300 | 0.19831400  | 0.00360100  |
| C | -0.45249900 | -1.13717400 | 0.00848500  |
| C | 1.39935600  | 0.56257600  | 0.00555000  |
| O | 1.82847400  | 1.76066000  | 0.00789300  |
| C | 2.34862200  | -0.50328400 | 0.00066700  |
| N | 3.16514500  | -1.33411100 | -0.01505800 |
| H | -2.11962800 | -2.47199300 | 0.00934800  |
| H | -3.81331100 | -0.65361800 | -0.00526800 |
| H | -3.05710300 | 1.71197600  | -0.01495200 |
| H | -0.64325000 | 2.24659700  | -0.00994700 |
| H | 0.27273100  | -1.94527800 | 0.01495000  |

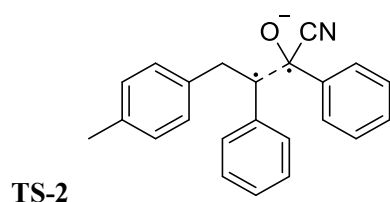

|   |             |             |             |
|---|-------------|-------------|-------------|
| C | -4.13198300 | -0.25944100 | -1.47520300 |
| C | -4.45640000 | -1.56720500 | -1.11617700 |
| C | -3.52128300 | -2.35785900 | -0.47971100 |
| C | -2.24933500 | -1.84488000 | -0.19200900 |
| C | -1.93358300 | -0.52454500 | -0.53847700 |
| C | -2.87583300 | 0.25590100  | -1.18601900 |
| C | -1.23940900 | -2.65501800 | 0.46534500  |
| C | 0.80104800  | 1.86206400  | -0.03486700 |
| O | -0.08731700 | -2.32313700 | 0.69203000  |
| C | 1.45143500  | 0.94245700  | 0.95280800  |
| C | -0.44607700 | 2.43135000  | 0.17629000  |

|   |             |             |             |
|---|-------------|-------------|-------------|
| C | 2.78224300  | 0.44475600  | 0.47030800  |
| C | 2.87861600  | -0.71229300 | -0.30131100 |
| C | 4.10192300  | -1.15070800 | -0.78566800 |
| C | 5.27713000  | -0.44856300 | -0.51816000 |
| C | 5.17976100  | 0.70781300  | 0.25005500  |
| C | 3.95353600  | 1.14631800  | 0.73621400  |
| C | 6.59927400  | -0.94101600 | -1.02244300 |
| C | -1.03805200 | 3.35373500  | -0.75336000 |
| C | -2.29133800 | 3.88128600  | -0.56503500 |
| C | -3.06915200 | 3.54617900  | 0.55672600  |
| C | -2.51596100 | 2.67273600  | 1.49057000  |
| C | -1.25541200 | 2.12828700  | 1.32305200  |
| C | -1.64915100 | -4.00311400 | 0.89670000  |
| N | -1.90060400 | -5.06714400 | 1.25770500  |
| H | -4.86662900 | 0.35947600  | -1.97840900 |
| H | -5.43968900 | -1.96500000 | -1.33873800 |
| H | -3.77008700 | -3.37830100 | -0.20784500 |
| H | -0.95586500 | -0.12054100 | -0.30541900 |
| H | -2.62998900 | 1.27857700  | -1.44725200 |
| H | 1.36720100  | 2.14448700  | -0.91782500 |
| H | 1.59611900  | 1.43585300  | 1.92867800  |
| H | 0.80936700  | 0.07098700  | 1.16779200  |
| H | 1.97749800  | -1.27845600 | -0.51502000 |
| H | 4.14791500  | -2.05789100 | -1.38158100 |
| H | 6.07900800  | 1.27429600  | 0.47346100  |
| H | 3.90632200  | 2.05124500  | 1.33525400  |
| H | 6.91509600  | -1.84112400 | -0.48469000 |
| H | 6.54938400  | -1.20389600 | -2.08239400 |
| H | 7.37723800  | -0.18656800 | -0.89227700 |
| H | -0.46829400 | 3.62880900  | -1.63755400 |
| H | -2.68980300 | 4.56983500  | -1.30584100 |
| H | -4.05693500 | 3.96886700  | 0.69888400  |
| H | -3.08864600 | 2.40224900  | 2.37430700  |
| H | -0.86843100 | 1.45274200  | 2.07852400  |

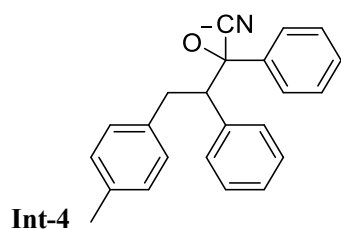

|   |             |            |            |
|---|-------------|------------|------------|
| C | -3.88630100 | 2.70168300 | 0.51150100 |
| C | -2.77981200 | 2.65679700 | 1.35231100 |
| C | -1.61950100 | 2.01573600 | 0.94231700 |

|   |             |             |             |
|---|-------------|-------------|-------------|
| C | -1.54828400 | 1.41248600  | -0.30990800 |
| C | -2.64979500 | 1.47427400  | -1.14959100 |
| C | -3.81654800 | 2.10978500  | -0.74247000 |
| C | -0.30295700 | 0.62971100  | -0.80112900 |
| C | -0.14426800 | -0.62365100 | 0.17185300  |
| O | -0.30907700 | 0.32318200  | -2.08311900 |
| C | 0.98892700  | -1.54107400 | -0.29819800 |
| C | -1.43914400 | -1.38136800 | 0.23989200  |
| C | 2.37458300  | -1.00903200 | -0.08076200 |
| C | 3.23293300  | -0.76981300 | -1.14731100 |
| C | 4.51083700  | -0.26412100 | -0.94302000 |
| C | 4.97673400  | 0.01695300  | 0.33669300  |
| C | 4.12064300  | -0.23840300 | 1.40932400  |
| C | 2.84850200  | -0.74391900 | 1.20473100  |
| C | 6.34967700  | 0.57001600  | 0.56565600  |
| C | -2.18357500 | -1.40812700 | 1.41764400  |
| C | -3.39421600 | -2.08397300 | 1.48819600  |
| C | -3.88498200 | -2.75015600 | 0.37331600  |
| C | -3.15056300 | -2.73644900 | -0.80580300 |
| C | -1.93879500 | -2.06279900 | -0.87097100 |
| C | 0.84781800  | 1.57929500  | -0.50270900 |
| N | 1.69499200  | 2.35889200  | -0.40889200 |
| H | -4.79451000 | 3.20098000  | 0.83160300  |
| H | -2.82244400 | 3.12363700  | 2.33091400  |
| H | -0.76185400 | 1.98461000  | 1.60817900  |
| H | -2.55907800 | 1.00633700  | -2.12329500 |
| H | -4.67410600 | 2.14518900  | -1.40679300 |
| H | 0.07964700  | -0.25475400 | 1.17773400  |
| H | 0.88911900  | -2.49552500 | 0.23036300  |
| H | 0.83752200  | -1.73461800 | -1.36184100 |
| H | 2.88903100  | -0.96525000 | -2.15810500 |
| H | 5.15647800  | -0.07886100 | -1.79626700 |
| H | 4.46071500  | -0.03634300 | 2.42098900  |
| H | 2.20463800  | -0.92964100 | 2.05940600  |
| H | 6.87886900  | 0.71650600  | -0.37754300 |
| H | 6.30587100  | 1.53304600  | 1.08289100  |
| H | 6.94799900  | -0.10081100 | 1.18953500  |
| H | -1.80888600 | -0.88357900 | 2.29106800  |
| H | -3.95599500 | -2.08838400 | 2.41639700  |
| H | -4.83095400 | -3.27841600 | 0.42342200  |
| H | -3.52573800 | -3.25360600 | -1.68297600 |
| H | -1.38013400 | -2.03132200 | -1.79786900 |

CN\*

|   |            |            |             |
|---|------------|------------|-------------|
| C | 0.00000000 | 0.00000000 | -0.62804500 |
| N | 0.00000000 | 0.00000000 | 0.53832400  |

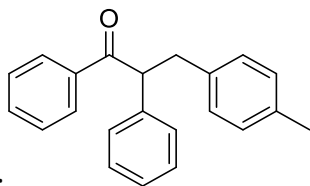

**4r**

|   |             |             |             |
|---|-------------|-------------|-------------|
| C | 1.94875800  | 4.21470400  | 0.58493300  |
| C | 1.49656900  | 4.06703300  | -0.72158100 |
| C | 1.01325400  | 2.84426800  | -1.15024600 |
| C | 0.97069100  | 1.75247700  | -0.28109600 |
| C | 1.42530900  | 1.91043400  | 1.02780400  |
| C | 1.91351500  | 3.13548600  | 1.45644000  |
| C | 0.44006200  | 0.46144800  | -0.80262800 |
| C | 0.42469300  | -0.75309100 | 0.11255300  |
| O | 0.06003200  | 0.37376000  | -1.95231400 |
| C | -0.64802700 | -1.76344000 | -0.31055200 |
| C | 1.80324000  | -1.37809800 | 0.12117100  |
| C | 2.44253100  | -1.64968600 | 1.32752800  |
| C | 3.69113200  | -2.25484100 | 1.34769400  |
| C | 4.32017500  | -2.59316900 | 0.15725800  |
| C | 3.69043300  | -2.32514600 | -1.05092500 |
| C | 2.44107800  | -1.72182100 | -1.06874300 |
| C | -2.04554500 | -1.25232600 | -0.10752800 |
| C | -2.87422600 | -0.95249500 | -1.18231100 |
| C | -4.16205100 | -0.47103800 | -0.98180300 |
| C | -4.66384100 | -0.26876600 | 0.29971000  |
| C | -3.83262400 | -0.57383600 | 1.37804600  |
| C | -2.54964600 | -1.05568800 | 1.17824900  |
| C | -6.04408100 | 0.26828800  | 0.52162100  |
| H | 2.32850100  | 5.17257600  | 0.92291500  |
| H | 1.52288200  | 4.90901100  | -1.40415700 |
| H | 0.65965300  | 2.71460400  | -2.16609900 |
| H | 1.40668700  | 1.08172200  | 1.72349800  |
| H | 2.26623100  | 3.24702600  | 2.47540000  |
| H | 0.20167600  | -0.42645800 | 1.12953000  |
| H | -0.49611500 | -2.03266800 | -1.35705000 |
| H | -0.49656400 | -2.66682100 | 0.28740200  |
| H | 1.95346000  | -1.38373600 | 2.25931300  |
| H | 4.17449300  | -2.46057200 | 2.29660300  |
| H | 5.29734400  | -3.06297900 | 0.17072400  |
| H | 4.17507500  | -2.58502100 | -1.98576000 |
| H | 1.95785100  | -1.51516500 | -2.01776800 |

|   |             |             |             |
|---|-------------|-------------|-------------|
| H | -2.50525400 | -1.09543800 | -2.19236500 |
| H | -4.78905700 | -0.24735500 | -1.83961300 |
| H | -4.20090700 | -0.43514500 | 2.39027500  |
| H | -1.92752800 | -1.29012500 | 2.03721000  |
| H | -6.61880100 | 0.27786500  | -0.40615300 |
| H | -6.58908000 | -0.32913300 | 1.25727500  |
| H | -6.00919700 | 1.29354800  | 0.90377300  |

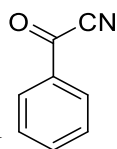

**PhCOCN**

|   |             |             |             |
|---|-------------|-------------|-------------|
| C | -1.76295100 | -1.45536100 | 0.00000100  |
| C | -2.72271800 | -0.45231700 | 0.00000200  |
| C | -2.34545900 | 0.88792900  | 0.00000100  |
| C | -1.00754200 | 1.22711900  | -0.00000200 |
| C | -0.03891200 | 0.21964900  | -0.00000300 |
| C | -0.41939000 | -1.12282800 | -0.00000200 |
| C | 1.37112700  | 0.60416800  | -0.00000600 |
| O | 1.80419700  | 1.73257800  | 0.00000500  |
| C | 2.36023200  | -0.49916700 | 0.00000000  |
| N | 3.18054100  | -1.30392100 | 0.00000200  |
| H | -2.06242400 | -2.49652200 | 0.00000200  |
| H | -3.77483700 | -0.71430400 | 0.00000500  |
| H | -3.10145000 | 1.66435800  | 0.00000100  |
| H | -0.69564100 | 2.26457800  | -0.00000400 |
| H | 0.33065500  | -1.90643600 | -0.00000300 |

**PhCO·**

|   |             |             |             |
|---|-------------|-------------|-------------|
| C | 1.69507600  | -1.05469800 | -0.00029500 |
| C | 2.16328900  | 0.25252400  | -0.00028200 |
| C | 1.27476400  | 1.32420400  | 0.00008700  |
| C | -0.08755400 | 1.09119900  | 0.00032000  |
| C | -0.55941000 | -0.22527900 | 0.00036800  |
| C | 0.33098700  | -1.29617400 | 0.00014600  |
| C | -1.99639400 | -0.49966300 | 0.00080100  |
| O | -2.91878600 | 0.24281800  | -0.00085300 |
| H | 2.39349400  | -1.88330900 | -0.00057300 |
| H | 3.23109900  | 0.44151500  | -0.00052000 |
| H | 1.65094000  | 2.34084900  | 0.00016900  |
| H | -0.79295500 | 1.91439200  | 0.00053300  |
| H | -0.05683900 | -2.30866500 | 0.00034600  |

**Ir(III)**

|    |             |             |             |
|----|-------------|-------------|-------------|
| Ir | -0.69074400 | -0.00473300 | -0.00700000 |
| C  | -1.89014500 | 2.21462900  | -3.40976000 |
| C  | -1.73853200 | 1.69246100  | -2.12580700 |
| N  | -0.84037700 | 0.69902100  | -1.92040300 |
| C  | -0.11035700 | 0.22808800  | -2.93604800 |
| C  | -0.21150800 | 0.70119900  | -4.23048400 |
| C  | -1.13249400 | 1.72231400  | -4.45067700 |
| C  | 0.92267700  | 2.58658800  | 0.52555400  |
| N  | 0.99357600  | 1.28203400  | 0.25125000  |
| C  | 2.20362500  | 0.71569900  | 0.10783700  |
| C  | 3.36762800  | 1.45818100  | 0.25508600  |
| C  | 3.31273700  | 2.81188900  | 0.55590900  |
| C  | 2.04154700  | 3.37235400  | 0.68380800  |
| N  | 0.98429800  | -1.28997100 | -0.32907300 |
| C  | 0.90903700  | -2.59008300 | -0.60123800 |
| C  | 2.02676100  | -3.38581400 | -0.76305500 |
| C  | 3.29568700  | -2.83198500 | -0.64053200 |
| C  | 3.35584200  | -1.47020100 | -0.35315600 |
| C  | 2.20110800  | -0.72388000 | -0.20046900 |
| C  | -1.63596700 | -1.70566700 | 2.15702400  |
| C  | -1.72756100 | -2.22875100 | 3.44629700  |
| C  | -0.92422600 | -1.73534200 | 4.45191700  |
| C  | -0.01688100 | -0.71191400 | 4.19015100  |
| C  | 0.02273600  | -0.23686900 | 2.89318300  |
| N  | -0.75169100 | -0.70879600 | 1.91140600  |
| C  | -3.76161800 | -2.71540700 | -1.33671800 |
| C  | -4.05960600 | -3.44248000 | -0.20059500 |
| C  | -3.36746300 | -3.11272600 | 0.94424100  |
| C  | -2.40858000 | -2.10361300 | 0.98875500  |
| C  | -2.12868500 | -1.38426200 | -0.19929800 |
| C  | -2.82361700 | -1.70447400 | -1.36315700 |
| C  | -4.06057000 | 3.41989800  | 0.33854700  |
| C  | -3.70859100 | 2.69428800  | 1.46008500  |
| C  | -2.76600100 | 1.68742400  | 1.44448500  |
| C  | -2.12269900 | 1.37001800  | 0.25050200  |
| C  | -2.45899000 | 2.08790600  | -0.92382000 |
| C  | -3.41926200 | 3.09286200  | -0.83625600 |
| F  | -3.76183300 | 3.80185400  | -1.92481100 |
| F  | -4.32004300 | 2.99175900  | 2.61788300  |
| F  | -4.42282000 | -3.01584100 | -2.46605400 |
| F  | -3.65735100 | -3.82357700 | 2.04681700  |
| C  | 0.87146500  | -0.14245000 | 5.24525200  |
| C  | 4.57449000  | -3.63383700 | -0.80124700 |
| C  | 5.39313800  | -3.03613200 | -1.94980500 |

|   |             |             |             |
|---|-------------|-------------|-------------|
| C | 5.37906100  | -3.54713500 | 0.49965000  |
| C | 4.29399700  | -5.09927200 | -1.10956500 |
| C | 4.55254900  | 3.66591700  | 0.74623300  |
| C | 5.83721100  | 2.86549200  | 0.57306200  |
| C | 4.53261800  | 4.80075200  | -0.28223300 |
| C | 4.52621700  | 4.25807500  | 2.15902300  |
| C | 0.62683600  | 0.13336600  | -5.32678600 |
| H | -2.60376600 | 3.00331900  | -3.58821000 |
| H | 0.58141800  | -0.56870200 | -2.69648600 |
| H | -1.25737600 | 2.13296800  | -5.44701600 |
| H | -0.07306300 | 2.99938600  | 0.62686000  |
| H | 4.32291600  | 0.97066600  | 0.13356900  |
| H | 1.91032200  | 4.42299400  | 0.90917900  |
| H | -0.08790300 | -3.00220800 | -0.69483700 |
| H | 1.88364600  | -4.43465400 | -0.98227100 |
| H | 4.31701500  | -0.98770700 | -0.24314700 |
| H | -2.42992300 | -3.01977900 | 3.65643200  |
| H | -1.00224600 | -2.14691000 | 5.45262000  |
| H | 0.70015500  | 0.56274800  | 2.62408500  |
| H | -4.79981700 | -4.23174400 | -0.20133200 |
| H | -2.64897700 | -1.18029800 | -2.29484800 |
| H | -4.80362600 | 4.20572600  | 0.37269800  |
| H | -2.54821900 | 1.16407100  | 2.36763600  |
| H | 1.47104200  | -0.92704200 | 5.71404100  |
| H | 1.54843400  | 0.60576900  | 4.83055600  |
| H | 0.28223900  | 0.33055800  | 6.03574300  |
| H | 6.31888700  | -3.60367100 | -2.07366000 |
| H | 4.83829500  | -3.07917100 | -2.89067400 |
| H | 5.66119200  | -1.99493200 | -1.75855400 |
| H | 6.30782500  | -4.11355200 | 0.39432800  |
| H | 4.81606000  | -3.96751300 | 1.33693200  |
| H | 5.64108600  | -2.51623100 | 0.74782500  |
| H | 3.72980100  | -5.58248000 | -0.30783500 |
| H | 3.73849800  | -5.21823200 | -2.04343400 |
| H | 5.24177900  | -5.63126100 | -1.21676100 |
| H | 6.69385500  | 3.52735500  | 0.71725100  |
| H | 5.91526600  | 2.05815700  | 1.30612500  |
| H | 5.91627700  | 2.43413300  | -0.42838800 |
| H | 5.41583400  | 5.43069900  | -0.14969500 |
| H | 3.64900100  | 5.43213200  | -0.16944300 |
| H | 4.54406200  | 4.40690000  | -1.30185000 |
| H | 4.53517700  | 3.46890400  | 2.91545700  |
| H | 5.40873900  | 4.88479400  | 2.31005100  |
| H | 3.64149700  | 4.87719600  | 2.32139800  |

|   |            |             |             |
|---|------------|-------------|-------------|
| H | 1.21250000 | 0.91725100  | -5.81412600 |
| H | 1.31488400 | -0.62369900 | -4.94801900 |
| H | 0.00057300 | -0.32789800 | -6.09536700 |

**Ir(III)\***

|    |             |             |             |
|----|-------------|-------------|-------------|
| Ir | -0.75033800 | -0.00195200 | 0.00005300  |
| C  | -1.85101200 | 2.24743100  | -3.40598000 |
| C  | -1.72908200 | 1.70995300  | -2.12777600 |
| N  | -0.86535600 | 0.68788500  | -1.92039300 |
| C  | -0.12635500 | 0.20604200  | -2.91923100 |
| C  | -0.19550800 | 0.69821300  | -4.21188500 |
| C  | -1.08800500 | 1.74145600  | -4.43813800 |
| C  | 0.86300900  | 2.61036000  | 0.48294300  |
| N  | 0.92290800  | 1.29094400  | 0.23952100  |
| C  | 2.15870900  | 0.69578800  | 0.10285200  |
| C  | 3.32647500  | 1.48136600  | 0.26151500  |
| C  | 3.26396000  | 2.82121000  | 0.52758700  |
| C  | 1.96764200  | 3.40057900  | 0.63273400  |
| N  | 0.92290600  | -1.28654900 | -0.30836700 |
| C  | 0.86166900  | -2.60120600 | -0.55532100 |
| C  | 1.96710800  | -3.39467500 | -0.72007500 |
| C  | 3.25751200  | -2.81706900 | -0.62465600 |
| C  | 3.32065400  | -1.47278300 | -0.36060000 |
| C  | 2.15924800  | -0.68741500 | -0.18921300 |
| C  | -1.58589100 | -1.74290600 | 2.16455800  |
| C  | -1.62299800 | -2.29658600 | 3.44113100  |
| C  | -0.81409300 | -1.78405400 | 4.43469700  |
| C  | 0.03994100  | -0.71772000 | 4.17104700  |
| C  | 0.02402100  | -0.20996600 | 2.88278900  |
| N  | -0.75812200 | -0.69941100 | 1.92139100  |
| C  | -3.65243700 | -2.84618500 | -1.35360900 |
| C  | -3.94200700 | -3.55411500 | -0.19868100 |
| C  | -3.28039800 | -3.19567000 | 0.95770600  |
| C  | -2.34413800 | -2.16899000 | 0.99786400  |
| C  | -2.09007500 | -1.45284000 | -0.20573000 |
| C  | -2.74755500 | -1.81071900 | -1.38435600 |
| C  | -3.97877200 | 3.50308600  | 0.35007500  |
| C  | -3.61738300 | 2.80516200  | 1.49107500  |
| C  | -2.69786200 | 1.78260400  | 1.47775100  |
| C  | -2.09981600 | 1.42773500  | 0.26661000  |
| C  | -2.42981300 | 2.13275200  | -0.92504600 |
| C  | -3.37587100 | 3.14747600  | -0.83883600 |
| F  | -3.74103900 | 3.83279000  | -1.92722100 |
| F  | -4.19884100 | 3.14843800  | 2.64386100  |

|   |             |             |             |
|---|-------------|-------------|-------------|
| F | -4.28989300 | -3.19264200 | -2.47544700 |
| F | -3.57785300 | -3.89031100 | 2.06074900  |
| C | 0.93716000  | -0.13656500 | 5.20991800  |
| C | 4.53372900  | -3.63009600 | -0.79942000 |
| C | 5.34946900  | -3.05038000 | -1.95851900 |
| C | 5.35959600  | -3.55324700 | 0.48818200  |
| C | 4.24154700  | -5.09613800 | -1.10031600 |
| C | 4.49246400  | 3.69269600  | 0.71313400  |
| C | 5.78908300  | 2.90514100  | 0.57332400  |
| C | 4.47912800  | 4.80563500  | -0.33955700 |
| C | 4.45074800  | 4.32077500  | 2.11018500  |
| C | 0.64999100  | 0.12324200  | -5.29678100 |
| H | -2.53713700 | 3.05937300  | -3.58822100 |
| H | 0.54228400  | -0.60714000 | -2.66855600 |
| H | -1.18440300 | 2.16375400  | -5.43248400 |
| H | -0.13038100 | 3.03192400  | 0.57445000  |
| H | 4.28562600  | 0.99355600  | 0.16590200  |
| H | 1.83287300  | 4.45425300  | 0.83694000  |
| H | -0.13198100 | -3.02488400 | -0.63455300 |
| H | 1.82360000  | -4.44542100 | -0.92519800 |
| H | 4.28434500  | -0.98811100 | -0.27571000 |
| H | -2.27824500 | -3.12695000 | 3.65193600  |
| H | -0.84373100 | -2.21956200 | 5.42754700  |
| H | 0.65759800  | 0.62213200  | 2.60459300  |
| H | -4.66175200 | -4.36305000 | -0.19657200 |
| H | -2.56688800 | -1.29323500 | -2.31788800 |
| H | -4.70854600 | 4.30229600  | 0.38329500  |
| H | -2.46027200 | 1.27213800  | 2.40244100  |
| H | 1.60993300  | -0.90033700 | 5.60876400  |
| H | 1.54064800  | 0.67466900  | 4.80156000  |
| H | 0.35575800  | 0.25365200  | 6.04955400  |
| H | 6.26757500  | -3.62881700 | -2.09552600 |
| H | 4.78227100  | -3.08633900 | -2.89264500 |
| H | 5.63120200  | -2.01180200 | -1.77251400 |
| H | 6.27991700  | -4.13392100 | 0.37770900  |
| H | 4.80065100  | -3.95905400 | 1.33573600  |
| H | 5.63707900  | -2.52413400 | 0.72671200  |
| H | 3.68475400  | -5.57433100 | -0.29038000 |
| H | 3.67190200  | -5.21472200 | -2.02570200 |
| H | 5.18439700  | -5.63554900 | -1.21907100 |
| H | 6.63872200  | 3.57784300  | 0.71330600  |
| H | 5.86523600  | 2.11317300  | 1.32315400  |
| H | 5.88378900  | 2.45181200  | -0.41700900 |
| H | 5.34947500  | 5.45432500  | -0.20725500 |

|   |            |             |             |
|---|------------|-------------|-------------|
| H | 3.58343200 | 5.42537500  | -0.26011700 |
| H | 4.51520100 | 4.38846000  | -1.34958700 |
| H | 4.46400300 | 3.54960800  | 2.88532700  |
| H | 5.32236000 | 4.96488800  | 2.25565900  |
| H | 3.55547000 | 4.92991900  | 2.25242000  |
| H | 1.23613700 | 0.90616100  | -5.78449400 |
| H | 1.33551700 | -0.63039600 | -4.90792300 |
| H | 0.02717400 | -0.34206200 | -6.06587900 |

**Ir(IV)**

|    |             |             |             |
|----|-------------|-------------|-------------|
| Ir | -0.70333200 | -0.00335500 | -0.00249900 |
| C  | -1.77950000 | 2.10473500  | -3.51374200 |
| C  | -1.67764200 | 1.62460600  | -2.20832200 |
| N  | -0.79833600 | 0.62931000  | -1.93853600 |
| C  | -0.03579100 | 0.12119600  | -2.91074800 |
| C  | -0.08577700 | 0.55311800  | -4.22271500 |
| C  | -0.98994500 | 1.57212200  | -4.51078100 |
| C  | 0.91038000  | 2.59969600  | 0.51625000  |
| N  | 0.95751600  | 1.28932800  | 0.26094200  |
| C  | 2.18815500  | 0.68061900  | 0.12964600  |
| C  | 3.36387000  | 1.45787300  | 0.29001700  |
| C  | 3.31134800  | 2.79814900  | 0.56207400  |
| C  | 2.02198900  | 3.38794300  | 0.67440800  |
| N  | 0.94724300  | -1.30821400 | -0.28010500 |
| C  | 0.88735700  | -2.61459700 | -0.53502300 |
| C  | 1.99320500  | -3.41750300 | -0.69609400 |
| C  | 3.28145500  | -2.84147400 | -0.58589400 |
| C  | 3.34620900  | -1.49739700 | -0.31498500 |
| C  | 2.18347600  | -0.70815600 | -0.15228400 |
| C  | -1.65986100 | -1.62753800 | 2.21412600  |
| C  | -1.74869800 | -2.10755600 | 3.52053000  |
| C  | -0.94670400 | -1.57718500 | 4.50885600  |
| C  | -0.04305500 | -0.56052100 | 4.21110700  |
| C  | -0.00600300 | -0.12874800 | 2.89862300  |
| N  | -0.78036000 | -0.63509500 | 1.93487900  |
| C  | -3.77489500 | -2.76937600 | -1.24585600 |
| C  | -4.07872500 | -3.45151600 | -0.08297100 |
| C  | -3.38894500 | -3.07713900 | 1.04984700  |
| C  | -2.42843700 | -2.06953000 | 1.05816600  |
| C  | -2.13926700 | -1.39566500 | -0.15659100 |
| C  | -2.83542900 | -1.76286000 | -1.30840000 |
| C  | -4.06224400 | 3.45876700  | 0.11623900  |
| C  | -3.74674300 | 2.77631100  | 1.27584900  |
| C  | -2.81056100 | 1.76619300  | 1.32767700  |

|   |             |             |             |
|---|-------------|-------------|-------------|
| C | -2.13003400 | 1.39557900  | 0.16765800  |
| C | -2.43127000 | 2.06975300  | -1.04393400 |
| C | -3.38780800 | 3.08098300  | -1.02462900 |
| F | -3.69736900 | 3.74848700  | -2.15168200 |
| F | -4.39234200 | 3.12506500  | 2.40335000  |
| F | -4.43564100 | -3.11477300 | -2.36558900 |
| F | -3.68726900 | -3.74439000 | 2.18009100  |
| C | 0.84977200  | 0.04443200  | 5.24328600  |
| C | 4.55996300  | -3.65445400 | -0.75474000 |
| C | 5.37884600  | -3.07746500 | -1.91308500 |
| C | 5.38418000  | -3.57616100 | 0.53363000  |
| C | 4.27110900  | -5.12181300 | -1.05350000 |
| C | 4.54965200  | 3.65916600  | 0.74353700  |
| C | 5.83963700  | 2.86096900  | 0.59886000  |
| C | 4.54473200  | 4.77217100  | -0.30927400 |
| C | 4.52158700  | 4.28896200  | 2.13998600  |
| C | 0.79422300  | -0.05399300 | -5.26458400 |
| H | -2.47731400 | 2.89477800  | -3.74247700 |
| H | 0.64097200  | -0.66926000 | -2.61378600 |
| H | -1.07471300 | 1.95144800  | -5.52375900 |
| H | -0.08389800 | 3.02395500  | 0.60263600  |
| H | 4.32038400  | 0.96484600  | 0.19199000  |
| H | 1.89558900  | 4.44222300  | 0.88118700  |
| H | -0.11060900 | -3.03049200 | -0.61948100 |
| H | 1.84932100  | -4.46802400 | -0.90237200 |
| H | 4.31181800  | -1.01762200 | -0.22082400 |
| H | -2.44621200 | -2.89558400 | 3.75698700  |
| H | -1.02152600 | -1.95632900 | 5.52268800  |
| H | 0.66945300  | 0.65981600  | 2.59369500  |
| H | -4.81988400 | -4.23928900 | -0.05505000 |
| H | -2.65447400 | -1.27622900 | -2.25968900 |
| H | -4.80061900 | 4.24940300  | 0.09688300  |
| H | -2.61979900 | 1.27957500  | 2.27701400  |
| H | 1.48309900  | -0.71756500 | 5.70559700  |
| H | 1.49614700  | 0.80676900  | 4.80606700  |
| H | 0.26474700  | 0.50856300  | 6.04213300  |
| H | 6.29815100  | -3.65509200 | -2.04807400 |
| H | 4.81311100  | -3.11503400 | -2.84810400 |
| H | 5.65839900  | -2.03794700 | -1.72858800 |
| H | 6.30491300  | -4.15748800 | 0.42707600  |
| H | 4.82306300  | -3.97939800 | 1.38101400  |
| H | 5.66126700  | -2.54672600 | 0.77111200  |
| H | 3.71049700  | -5.59800200 | -0.24503900 |
| H | 3.70530400  | -5.24338300 | -1.98079600 |

|   |            |             |             |
|---|------------|-------------|-------------|
| H | 5.21489300 | -5.66138700 | -1.16661500 |
| H | 6.69600300 | 3.52584600  | 0.73743300  |
| H | 5.91083700 | 2.06670000  | 1.34676500  |
| H | 5.92734100 | 2.40814800  | -0.39233500 |
| H | 5.42216300 | 5.41275900  | -0.18186600 |
| H | 3.65514400 | 5.40032400  | -0.22712700 |
| H | 4.57158200 | 4.35378700  | -1.31915600 |
| H | 4.52919400 | 3.51804700  | 2.91553000  |
| H | 5.40041100 | 4.92440400  | 2.28248300  |
| H | 3.63295700 | 4.90689800  | 2.28577400  |
| H | 1.42242000 | 0.70693000  | -5.73554500 |
| H | 1.44539900 | -0.81619100 | -4.83430100 |
| H | 0.19932000 | -0.51881000 | -6.05572400 |

## 11. Characterization Data of Compounds

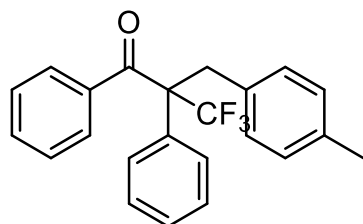

**3,3,3-trifluoro-2-(4-methylbenzyl)-1,2-diphenylpropan-1-one (4a):** Purification by column chromatography (silica gel, PE/EA = 30:1) afforded **4a** (58%, 42.7 mg) as a light yellow liquid.  $^1\text{H}$  NMR (400 MHz,  $\text{CDCl}_3$ )  $\delta$  7.50 – 7.45 (m, 2H), 7.44 – 7.36 (m, 6H), 7.26 – 7.21 (m, 2H), 6.87 (d,  $J = 7.9$  Hz, 2H), 6.67 (d,  $J = 8.0$  Hz, 2H), 3.84 (dd,  $J = 65.5, 14.5$  Hz, 2H), 2.22 (s, 3H).  $^{13}\text{C}$   $\{^1\text{H}\}$  NMR (101 MHz,  $\text{CDCl}_3$ )  $\delta$  194.5, 136.6, 136.2, 135.4, 132.6, 131.8, 130.7, 130.4, 128.9, 128.8, 128.6, 128.5, 128.2, 125.6 (d,  $J = 285.6$  Hz), 65.6 (q,  $J = 21.9$  Hz), 39.2 (d,  $J = 1.1$  Hz), 21.0.  $^{19}\text{F}$  NMR (377 MHz,  $\text{CDCl}_3$ )  $\delta$  -64.63. HRMS (ESI-TOF) for  $\text{C}_{23}\text{H}_{20}\text{F}_3\text{O}$  ( $[\text{M}+\text{H}]^+$ ): calcd. 369.1460; found: 369.1452.

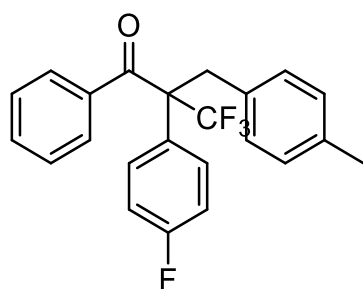

**3,3,3-trifluoro-2-(4-fluorophenyl)-2-(4-methylbenzyl)-1-phenylpropan-1-one (4b):** Purification by column chromatography (silica gel, PE/EA = 30:1) afforded **4b** (71%, 55.2 mg) as a white solid (113-114 °C).  $^1\text{H}$  NMR (400 MHz,  $\text{CDCl}_3$ )  $\delta$  7.51 – 7.42 (m, 3H), 7.39 – 7.32 (m, 2H), 7.31 – 7.23 (m, 2H), 7.12 – 7.04 (m, 2H), 6.88 (d,  $J = 7.9$  Hz, 2H), 6.66 (d,  $J = 7.9$  Hz, 2H), 3.81 (dd,  $J = 73.4, 14.4$  Hz, 2H), 2.23 (s, 3H).  $^{13}\text{C}$   $\{^1\text{H}\}$  NMR (101 MHz,  $\text{CDCl}_3$ )  $\delta$  194.1, 162.8 (d,  $J = 249.7$  Hz), 136.7, 135.9, 132.8, 131.4, 131.2 (d,  $J = 3.6$  Hz), 130.7, 130.5, 130.4, 128.6, 128.3, 125.5 (d,  $J = 285.5$  Hz), 115.9 (d,  $J = 21.6$  Hz), 65.1 (q,  $J = 21.8$  Hz), 39.3, 21.0.  $^{19}\text{F}$  NMR (377 MHz,  $\text{CDCl}_3$ )  $\delta$  -64.96, -112.40. HRMS (ESI-TOF) for  $\text{C}_{23}\text{H}_{19}\text{F}_4\text{O}$  ( $[\text{M}+\text{H}]^+$ ): calcd. 387.1367; found: 387.1363.

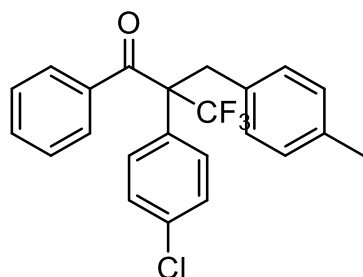

**2-(4-chlorophenyl)-3,3,3-trifluoro-2-(4-methylbenzyl)-1-phenylpropan-1-one (4c):** Purification by column chromatography (silica gel, PE/EA = 30:1) afforded **4c** (82%, 65.8 mg) as a white solid (141-143 °C).  $^1\text{H}$  NMR (400 MHz,  $\text{CDCl}_3$ )  $\delta$  7.52 – 7.42 (m, 3H), 7.37 – 7.23 (m, 6H), 6.88 (d,  $J = 7.9$  Hz, 2H), 6.66 (d,  $J = 7.9$  Hz, 2H), 3.80 (dd,  $J = 73.6, 14.4$  Hz, 2H), 2.23 (s, 3H).  $^{13}\text{C}$   $\{^1\text{H}\}$  NMR (101 MHz,  $\text{CDCl}_3$ )  $\delta$  194.0, 136.8, 135.8, 135.1, 133.9, 132.9, 131.3, 130.7, 130.4, 130.0, 129.1,

128.6, 128.3, 125.4 (d,  $J = 285.6$  Hz), 65.2 (q,  $J = 22.0$  Hz), 39.2 (d,  $J = 0.9$  Hz), 21.0.  $^{19}\text{F}$  NMR (377 MHz,  $\text{CDCl}_3$ )  $\delta$  -64.78. HRMS (ESI-TOF) for  $\text{C}_{23}\text{H}_{19}\text{ClF}_3\text{O}$  ( $[\text{M}+\text{H}]^+$ ): calcd. 403.1071; found: 403.1062.

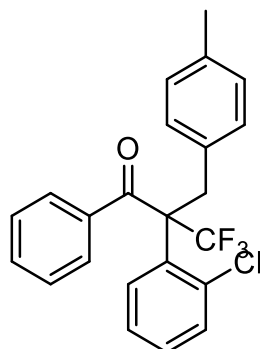

**2-(2-chlorophenyl)-3,3,3-trifluoro-2-(4-methylbenzyl)-1-phenylpropan-1-one (4d):** Purification by column chromatography (silica gel, PE/EA = 30:1) afforded **4d** (10%, 8.1 mg) as a colorless liquid.  $^1\text{H}$  NMR (400 MHz,  $\text{CDCl}_3$ )  $\delta$  7.65 (d,  $J = 7.8$  Hz, 2H), 7.50 – 7.40 (m, 2H), 7.29 (dt,  $J = 6.8, 3.9$  Hz, 3H), 7.22 (dd,  $J = 8.3, 7.6$  Hz, 2H), 6.84 (d,  $J = 7.9$  Hz, 2H), 6.62 (d,  $J = 7.9$  Hz, 2H), 3.93 (dd,  $J = 89.7, 15.0$  Hz, 2H), 2.22 (s, 3H).  $^{13}\text{C}$   $\{^1\text{H}\}$  NMR (101 MHz,  $\text{CDCl}_3$ )  $\delta$  193.1, 136.2, 134.1, 132.9, 132.2, 131.7, 130.9, 129.8, 129.7, 128.2, 127.9, 127.5, 125.6 (d,  $J = 287.5$  Hz), 65.7 (q,  $J = 22.4$  Hz), 29.7, 21.0.  $^{19}\text{F}$  NMR (377 MHz,  $\text{CDCl}_3$ )  $\delta$  -60.78. HRMS (ESI-TOF) for  $\text{C}_{23}\text{H}_{19}\text{ClF}_3\text{O}$  ( $[\text{M}+\text{H}]^+$ ): calcd. 403.1071 found: 403.1073.

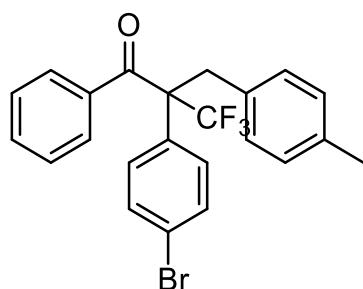

**2-(4-bromophenyl)-3,3,3-trifluoro-2-(4-methylbenzyl)-1-phenylpropan-1-one (4e):** Purification by column chromatography (silica gel, PE/EA = 30:1) afforded **4e** (75%, 67.7 mg) as a white solid (138-139°C).  $^1\text{H}$  NMR (400 MHz,  $\text{CDCl}_3$ )  $\delta$  7.54 – 7.43 (m, 5H), 7.31 – 7.22 (m, 4H), 6.88 (d,  $J = 7.9$  Hz, 2H), 6.66 (d,  $J = 7.8$  Hz, 2H), 3.80 (dd,  $J = 73.7, 14.4$  Hz, 2H), 2.23 (s, 3H).  $^{13}\text{C}$   $\{^1\text{H}\}$  NMR (101 MHz,  $\text{CDCl}_3$ )  $\delta$  193.9, 136.8, 135.8, 134.5, 132.9, 132.0, 131.3, 130.7, 130.4, 130.3, 128.6, 128.3, 125.3 (d,  $J = 285.5$  Hz), 123.3, 65.3 (q,  $J = 22.5$  Hz), 39.1, 21.0.  $^{19}\text{F}$  NMR (377 MHz,  $\text{CDCl}_3$ )  $\delta$  -64.77. HRMS (ESI-TOF) for  $\text{C}_{23}\text{H}_{19}\text{BrF}_3\text{O}$  ( $[\text{M}+\text{H}]^+$ ): calcd. 447.0566; found: 447.0569.

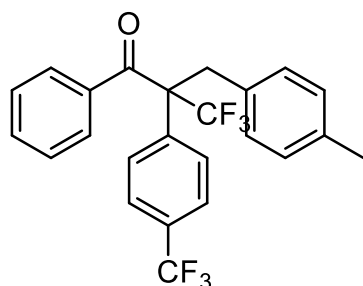

**3,3,3-trifluoro-2-(4-methylbenzyl)-1-phenyl-2-(4-(trifluoromethyl)phenyl)propan-1-one (4f):**

Purification by column chromatography (silica gel, PE/EA = 30:1) afforded **4f** (76%, 66.8 mg) as a white solid (117-118 °C). <sup>1</sup>H NMR (400 MHz, CDCl<sub>3</sub>) δ 7.64 (d, *J* = 8.4 Hz, 2H), 7.53 – 7.41 (m, 5H), 7.30 – 7.25 (m, 2H), 6.88 (d, *J* = 7.9 Hz, 2H), 6.66 (d, *J* = 8.0 Hz, 2H), 3.84 (dd, *J* = 85.9, 14.4 Hz, 2H), 2.23 (s, 3H). <sup>13</sup>C {<sup>1</sup>H} NMR (101 MHz, CDCl<sub>3</sub>) δ 193.6, 139.4, 136.9, 135.5, 133.0, 131.1, 131.0 (d, *J* = 32.9 Hz), 130.8, 130.4, 129.1, 128.6, 128.3, 125.9 (d, *J* = 164.5 Hz), 125.7 (q, *J* = 3.6 Hz), 123.1 (d, *J* = 151.2 Hz), 65.7 (q, *J* = 22.0 Hz), 39.3, 21.0. <sup>19</sup>F NMR (377 MHz, CDCl<sub>3</sub>) δ -62.78, -64.46. HRMS (ESI-TOF) for C<sub>24</sub>H<sub>18</sub>F<sub>6</sub>O<sub>2</sub>Na ([M+Na]<sup>+</sup>): calcd. 459.1154; found: 459.1155.

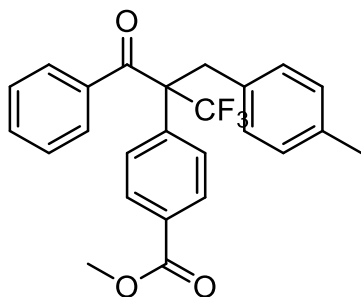

**methyl 4-(1,1,1-trifluoro-2-(4-methylbenzyl)-3-oxo-3-phenylpropan-2-yl)benzoate (4g):**

Purification by column chromatography (silica gel, PE/EA = 30:1) afforded **4g** (31%, 26.3 mg) as a light yellow liquid. <sup>1</sup>H NMR (400 MHz, CDCl<sub>3</sub>) δ 8.03 (d, *J* = 8.6 Hz, 2H), 7.49 – 7.40 (m, 5H), 7.27 – 7.21 (m, 2H), 6.87 (d, *J* = 7.9 Hz, 2H), 6.66 (d, *J* = 8.0 Hz, 2H), 3.96 – 3.91 (m, 4H), 3.73 (d, *J* = 14.4 Hz, 1H), 2.23 (s, 3H). <sup>13</sup>C {<sup>1</sup>H} NMR (101 MHz, CDCl<sub>3</sub>) δ 193.8, 166.4, 140.3, 136.7, 135.7, 132.9, 131.3, 130.8, 130.4, 129.9, 128.8, 128.5, 128.2, 125.4 (d, *J* = 285.8 Hz), 65.8 (q, *J* = 22.4 Hz), 52.3, 39.4, 21.0. <sup>19</sup>F NMR (377 MHz, CDCl<sub>3</sub>) δ -64.19. HRMS (ESI-TOF) for C<sub>25</sub>H<sub>22</sub>F<sub>3</sub>O<sub>3</sub> ([M+H]<sup>+</sup>): calcd. 427.1516; found: 427.1513.

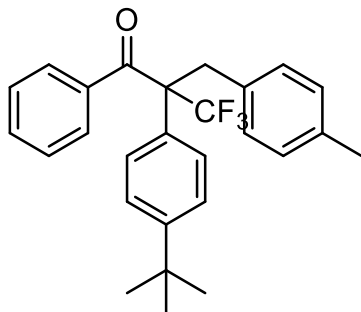

**2-(4-(tert-butyl)phenyl)-3,3,3-trifluoro-2-(4-methylbenzyl)-1-phenylpropan-1-one (4h):**

Purification by column chromatography (silica gel, PE/EA = 30:1) afforded **4h** (75%, 63.4 mg) as a colorless liquid. <sup>1</sup>H NMR (400 MHz, CDCl<sub>3</sub>) δ 7.48 (d, *J* = 8.4 Hz, 2H), 7.45 – 7.37 (m, 3H), 7.33 (d, *J* = 8.3 Hz, 2H), 7.28 – 7.23 (m, 2H), 6.87 (d, *J* = 7.8 Hz, 2H), 6.66 (d, *J* = 7.6 Hz, 2H), 3.83 (dd, *J* = 58.9, 14.5 Hz, 2H), 2.22 (s, 3H), 1.33 (s, 9H). <sup>13</sup>C {<sup>1</sup>H} NMR (101 MHz, CDCl<sub>3</sub>) δ 194.7, 152.0, 136.5, 136.3, 132.6, 132.2, 131.9, 130.6, 130.4, 128.5, 128.2, 128.2, 125.8, 125.7 (d, *J* = 285.5 Hz), 65.2 (q, *J* = 21.8 Hz), 39.1, 34.6, 31.3, 21.0. <sup>19</sup>F NMR (377 MHz, CDCl<sub>3</sub>) δ -64.83. HRMS (ESI-TOF) for C<sub>27</sub>H<sub>28</sub>F<sub>3</sub>O ([M+H]<sup>+</sup>): calcd. 425.2087; found: 425.2089.

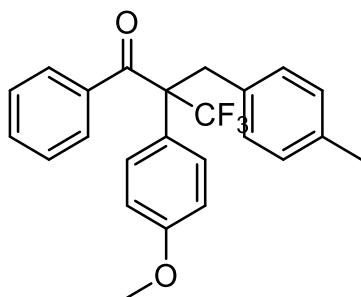

**3,3,3-trifluoro-2-(4-methoxyphenyl)-2-(4-methylbenzyl)-1-phenylpropan-1-one (4i):**

Purification by column chromatography (silica gel, PE/EA = 30:1) afforded **4i** (79%, 63.5 mg) as a white solid (120-122 °C). <sup>1</sup>H NMR (400 MHz, CDCl<sub>3</sub>) δ 7.54 – 7.47 (m, 2H), 7.46 – 7.41 (m, 1H), 7.33 (d, *J* = 7.6 Hz, 2H), 7.26 (t, *J* = 8.0 Hz, 2H), 6.96 – 6.86 (m, 4H), 6.67 (d, *J* = 6.6 Hz, 2H), 3.92 – 3.72 (m, 5H), 2.23 (s, 3H). <sup>13</sup>C {<sup>1</sup>H} NMR (101 MHz, CDCl<sub>3</sub>) δ 194.6, 159.8, 136.6, 136.2, 132.6, 131.8, 130.6, 130.5, 129.8, 128.5, 128.2, 127.1, 124.2, 114.3, 64.9 (q, *J* = 21.9 Hz), 55.3, 39.1, 21.0. <sup>19</sup>F NMR (377 MHz, CDCl<sub>3</sub>) δ -65.23. HRMS (ESI-TOF) for C<sub>24</sub>H<sub>22</sub>F<sub>3</sub>O<sub>2</sub> ([M+H]<sup>+</sup>): calcd. 399.1566; found: 399.1573.

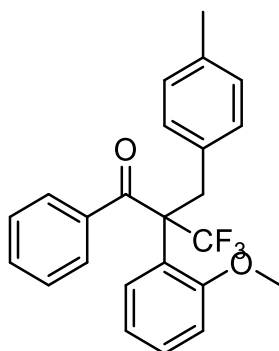

**3,3,3-trifluoro-2-(2-methoxyphenyl)-2-(4-methylbenzyl)-1-phenylpropan-1-one (4j):**

Purification by column chromatography (silica gel, PE/EA = 30:1) afforded **4j** (37%, 29.5 mg) as a colorless liquid. <sup>1</sup>H NMR (400 MHz, CDCl<sub>3</sub>) δ 7.64 (d, *J* = 7.7 Hz, 2H), 7.43 – 7.35 (m, 2H), 7.35 – 7.29 (m, 1H), 7.19 (t, *J* = 7.9 Hz, 2H), 6.99 (t, *J* = 7.2 Hz, 1H), 6.84 (d, *J* = 7.9 Hz, 2H), 6.69 (d, *J* = 7.9 Hz, 1H), 6.61 (d, *J* = 7.9 Hz, 2H), 3.76 (dd, *J* = 71.8, 14.5 Hz, 2H), 3.20 (s, 3H), 2.21 (s, 3H). <sup>13</sup>C NMR (101 MHz, CDCl<sub>3</sub>) δ 193.8, 156.6, 136.2, 135.8, 132.9, 132.2, 131.0, 129.7, 128.9, 128.2, 128.0, 127.6, 125.5, 124.5, 121.3, 111.8, 63.40 (q, *J* = 21.9 Hz), 54.6, 38.0, 21.0. <sup>19</sup>F NMR (377 MHz, CDCl<sub>3</sub>) δ -62.43. HRMS (ESI-TOF) for C<sub>24</sub>H<sub>22</sub>F<sub>3</sub>O<sub>2</sub> ([M+H]<sup>+</sup>): calcd. 399.1566; found: 399.1575.

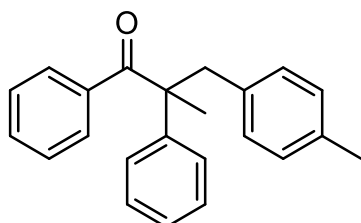

**2-methyl-1,2-diphenyl-3-(p-tolyl)propan-1-one (4k):** Purification by column chromatography (silica gel, PE/EA = 30:1) afforded **4k** (37%, 23.3 mg) as a colorless liquid. <sup>1</sup>H NMR (400 MHz, CDCl<sub>3</sub>) δ 7.47 (d, *J* = 7.3 Hz, 2H), 7.39 – 7.27 (m, 4H), 7.24 – 7.14 (m, 4H), 6.89 (d, *J* = 7.8 Hz, 2H), 6.52 (d, *J* = 7.9 Hz, 2H), 3.36 – 3.24 (m, 2H), 2.25 (s, 3H), 1.53 (s, 3H). <sup>13</sup>C {<sup>1</sup>H} NMR (101

MHz, CDCl<sub>3</sub>) δ 203.4, 142.9, 136.8, 135.6, 134.2, 131.6, 130.8, 129.7, 128.7, 128.2, 128.0, 127.0, 126.9, 55.4, 45.9, 22.6, 21.0. HRMS (ESI-TOF) for C<sub>23</sub>H<sub>23</sub>O ([M+H]<sup>+</sup>): calcd. 315.1743; found: 315.1748.

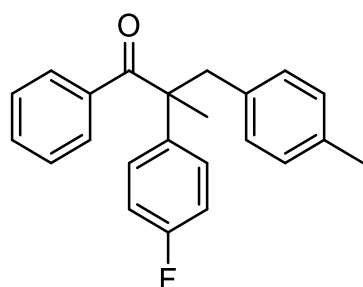

**2-(4-fluorophenyl)-2-methyl-1-phenyl-3-(p-tolyl)propan-1-one (4l)**: Purification by column chromatography (silica gel, PE/EA = 30:1) afforded **4l** (53%, 35.5 mg) as a white solid (60-62 °C). <sup>1</sup>H NMR (400 MHz, CDCl<sub>3</sub>) δ 7.50 – 7.44 (m, 2H), 7.41 – 7.35 (m, 1H), 7.26 – 7.21 (m, 2H), 7.14 – 7.08 (m, 2H), 7.05 – 6.98 (m, 2H), 6.91 (d, *J* = 7.8 Hz, 2H), 6.51 (d, *J* = 8.0 Hz, 2H), 3.27 (s, 2H), 2.26 (s, 3H), 1.53 (s, 3H). <sup>13</sup>C {<sup>1</sup>H} NMR (101 MHz, CDCl<sub>3</sub>) δ 203.2, 161.8 (d, *J* = 246.2 Hz), 138.7 (d, *J* = 3.3 Hz), 136.6, 135.7, 133.9, 131.8, 130.8, 129.7, 128.5 (d, *J* = 7.9 Hz), 128.3, 128.0, 115.6 (d, *J* = 21.2 Hz), 54.9, 46.1, 22.7, 21.0. <sup>19</sup>F NMR (377 MHz, CDCl<sub>3</sub>) δ -115.51. HRMS (ESI-TOF) for C<sub>23</sub>H<sub>22</sub>FO ([M+H]<sup>+</sup>): calcd. 333.1649; found: 333.1641.

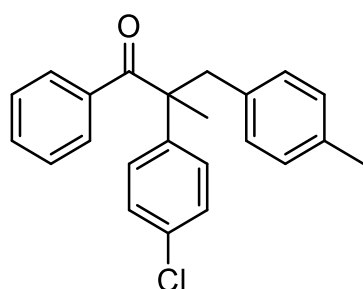

**2-(4-chlorophenyl)-2-methyl-1-phenyl-3-(p-tolyl)propan-1-one (4m)**: Purification by column chromatography (silica gel, PE/EA = 30:1) afforded **4m** (60%, 42.4 mg) as a colorless liquid. <sup>1</sup>H NMR (400 MHz, CDCl<sub>3</sub>) δ 7.46 (d, *J* = 8.1 Hz, 2H), 7.38 (t, *J* = 7.4 Hz, 1H), 7.28 (d, *J* = 8.5 Hz, 2H), 7.26 – 7.21 (m, 2H), 7.08 (d, *J* = 8.4 Hz, 2H), 6.91 (d, *J* = 7.8 Hz, 2H), 6.52 (d, *J* = 7.8 Hz, 2H), 3.27 (q, *J* = 13.5 Hz, 2H), 2.26 (s, 3H), 1.53 (s, 3H). <sup>13</sup>C {<sup>1</sup>H} NMR (101 MHz, CDCl<sub>3</sub>) δ 202.9, 141.6, 136.5, 135.8, 133.8, 132.9, 131.8, 130.8, 129.7, 128.9, 128.3, 128.1, 55.1, 46.0, 22.6, 21.0. HRMS (ESI-TOF) for C<sub>23</sub>H<sub>22</sub>ClO ([M+H]<sup>+</sup>): calcd. 349.1354; found: 349.1352.

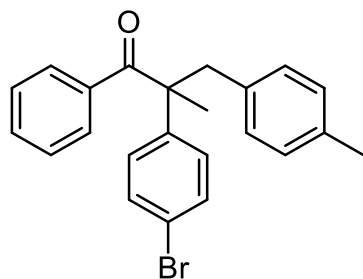

**2-(4-bromophenyl)-2-methyl-1-phenyl-3-(p-tolyl)propan-1-one (4n)**: Purification by column chromatography (silica gel, PE/EA = 30:1) afforded **4n** (44%, 34.7 mg) as a colorless liquid. <sup>1</sup>H NMR (400 MHz, CDCl<sub>3</sub>) δ 7.47 (s, 1H), 7.46 – 7.44 (m, 2H), 7.43 – 7.42 (m, 1H), 7.41 – 7.35 (m,

1H), 7.24 (t,  $J = 5.8$  Hz, 2H), 7.05 – 6.99 (m, 2H), 6.91 (d,  $J = 7.8$  Hz, 2H), 6.52 (d,  $J = 8.0$  Hz, 2H), 3.27 (q,  $J = 13.5$  Hz, 2H), 2.26 (s, 3H), 1.52 (s, 3H).  $^{13}\text{C}$   $\{^1\text{H}\}$  NMR (101 MHz,  $\text{CDCl}_3$ )  $\delta$  202.8, 142.2, 136.4, 135.8, 133.7, 131.9, 130.8, 129.7, 128.7, 128.3, 128.1, 121.0, 55.1, 45.9, 22.6, 21.0. HRMS (ESI-TOF) for  $\text{C}_{23}\text{H}_{22}\text{BrO}$  ( $[\text{M}+\text{H}]^+$ ): calcd. 393.0843; found: 393.0848.

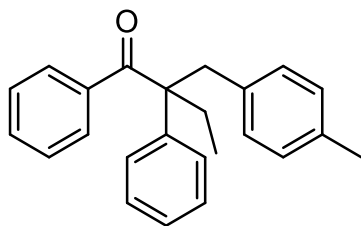

**2-(4-methylbenzyl)-1,2-diphenylbutan-1-one (4o)**: Purification by column chromatography (silica gel, PE/EA = 30:1) afforded **4o** (31%, 20.5 mg) as a light yellow liquid.  $^1\text{H}$  NMR (400 MHz,  $\text{CDCl}_3$ )  $\delta$  7.49 (d,  $J = 7.6$  Hz, 2H), 7.36 (t,  $J = 7.4$  Hz, 1H), 7.31 – 7.25 (m, 3H), 7.21 (t,  $J = 7.8$  Hz, 2H), 7.15 – 7.10 (m, 2H), 6.86 (d,  $J = 7.9$  Hz, 2H), 6.41 (d,  $J = 7.9$  Hz, 2H), 3.32 (dd,  $J = 67.7, 13.8$  Hz, 2H), 2.24 (s, 3H), 2.14 – 1.97 (m, 2H), 0.85 (t,  $J = 7.4$  Hz, 3H).  $^{13}\text{C}$   $\{^1\text{H}\}$  NMR (101 MHz,  $\text{CDCl}_3$ )  $\delta$  203.0, 142.9, 137.1, 135.6, 134.0, 131.7, 130.4, 129.7, 128.7, 128.2, 128.0, 127.3, 127.0, 59.4, 40.8, 25.6, 21.0, 8.6. HRMS (ESI-TOF) for  $\text{C}_{24}\text{H}_{25}\text{O}$  ( $[\text{M}+\text{H}]^+$ ): calcd. 329.1900; found: 329.1887.

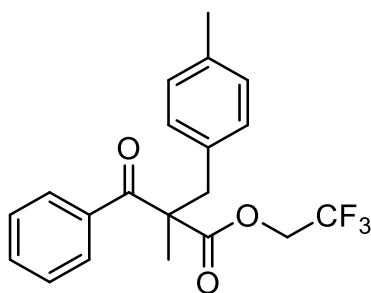

**2,2,2-trifluoroethyl 2-methyl-2-(4-methylbenzyl)-3-oxo-3-phenylpropanoate (4p)**: Purification by column chromatography (silica gel, PE/EA = 30:1) afforded **4p** (51%, 37.3 mg) as a colorless liquid.  $^1\text{H}$  NMR (400 MHz,  $\text{CDCl}_3$ )  $\delta$  7.82 (d,  $J = 7.5$  Hz, 2H), 7.58 – 7.52 (m, 1H), 7.44 (t,  $J = 7.7$  Hz, 2H), 7.05 (d,  $J = 7.8$  Hz, 2H), 6.91 (d,  $J = 8.0$  Hz, 2H), 4.35 (q,  $J = 8.4$  Hz, 2H), 3.43 – 3.33 (m, 2H), 2.30 (s, 3H), 1.55 (s, 3H).  $^{13}\text{C}$   $\{^1\text{H}\}$  NMR (101 MHz,  $\text{CDCl}_3$ )  $\delta$  196.3, 172.4, 136.8, 135.6, 132.9, 132.3, 130.1, 129.0, 128.7, 128.4, 122.5 (d,  $J = 277.6$  Hz), 60.8 (q,  $J = 37.0$  Hz), 58.4, 41.8, 21.2, 21.0.  $^{19}\text{F}$  NMR (377 MHz,  $\text{CDCl}_3$ )  $\delta$  -73.46. HRMS (ESI-TOF) for  $\text{C}_{20}\text{H}_{20}\text{F}_3\text{O}_3$  ( $[\text{M}+\text{H}]^+$ ): calcd. 365.1395; found: 365.1372.

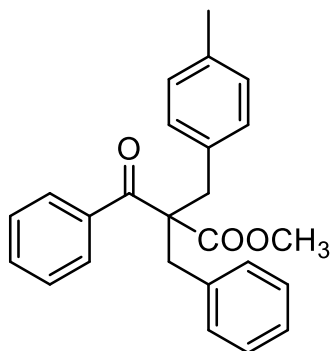

**methyl 2-benzyl-2-(4-methylbenzyl)-3-oxo-3-phenylpropanoate (4q)**: Purification by column

chromatography (silica gel, PE/EA = 30:1) afforded **4q** (33%, 24.5 mg) as a colorless liquid.  $^1\text{H}$  NMR (400 MHz,  $\text{CDCl}_3$ )  $\delta$  7.65 (d,  $J = 7.4$  Hz, 2H), 7.42 (t,  $J = 7.4$  Hz, 1H), 7.31 (t,  $J = 7.7$  Hz, 2H), 7.17 – 7.09 (m, 3H), 7.05 – 6.99 (m, 2H), 6.95 (d,  $J = 8.0$  Hz, 2H), 6.88 (d,  $J = 8.0$  Hz, 2H), 3.38 (s, 3H), 3.37 – 3.25 (m, 4H), 2.21 (s, 3H).  $^{13}\text{C}$   $\{^1\text{H}\}$  NMR (101 MHz,  $\text{CDCl}_3$ )  $\delta$  196.7, 173.2, 136.6, 136.5, 136.3, 132.9, 132.6, 130.4, 130.2, 128.9, 128.6, 128.5, 128.2, 126.9, 63.5, 51.9, 40.1, 39.9, 21.1. HRMS (ESI-TOF) for  $\text{C}_{25}\text{H}_{25}\text{O}_3$  ( $[\text{M}+\text{H}]^+$ ): calcd. 373.1798; found: 373.1799.

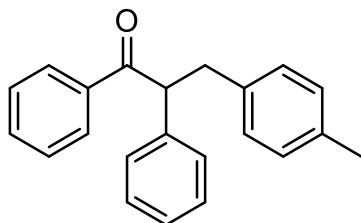

**1,2-diphenyl-3-(p-tolyl)propan-1-one (4r)**: Purification by column chromatography (silica gel, PE/EA = 30:1) afforded **4r** (51%, 30.6 mg) as a white solid (67–69 °C).  $^1\text{H}$  NMR (400 MHz,  $\text{CDCl}_3$ )  $\delta$  7.90 (d,  $J = 7.5$  Hz, 2H), 7.45 (t,  $J = 7.3$  Hz, 1H), 7.34 (t,  $J = 7.6$  Hz, 2H), 7.25 (t,  $J = 4.7$  Hz, 4H), 7.22 – 7.16 (m, 1H), 6.99 (q,  $J = 8.1$  Hz, 4H), 4.80 (t,  $J = 7.2$  Hz, 1H), 3.53 (dd,  $J = 13.8, 7.6$  Hz, 1H), 3.02 (dd,  $J = 13.8, 6.9$  Hz, 1H), 2.26 (s, 3H).  $^{13}\text{C}$   $\{^1\text{H}\}$  NMR (101 MHz,  $\text{CDCl}_3$ )  $\delta$  199.4, 139.2, 136.8, 136.7, 135.6, 132.9, 129.02, 128.96, 128.9, 128.7, 128.5, 128.3, 127.2, 56.0, 39.7, 21.1. HRMS (ESI-TOF) for  $\text{C}_{22}\text{H}_{20}\text{ONa}$  ( $[\text{M}+\text{Na}]^+$ ): calcd. 323.1406; found: 323.1408.

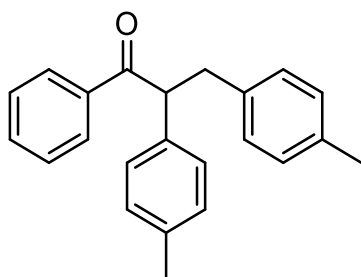

**1-phenyl-2,3-di-p-tolylpropan-1-one (4s)**: Purification by column chromatography (silica gel, PE/EA = 30:1) afforded **4s** (41%, 26.1 mg) as a white solid (95–97 °C).  $^1\text{H}$  NMR (400 MHz,  $\text{CDCl}_3$ )  $\delta$  7.89 (d,  $J = 7.3$  Hz, 2H), 7.42 (t,  $J = 7.4$  Hz, 1H), 7.32 (t,  $J = 7.6$  Hz, 2H), 7.13 (d,  $J = 8.0$  Hz, 2H), 7.06 (d,  $J = 8.0$  Hz, 2H), 7.00 – 6.97 (m, 4H), 4.77 (t,  $J = 7.2$  Hz, 1H), 3.52 (dd,  $J = 13.8, 7.7$  Hz, 1H), 2.99 (dd,  $J = 13.8, 6.7$  Hz, 1H), 2.26 (s, 3H), 2.25 (s, 3H).  $^{13}\text{C}$   $\{^1\text{H}\}$  NMR (101 MHz,  $\text{CDCl}_3$ )  $\delta$  199.4, 136.8, 136.7, 136.2, 135.5, 132.7, 129.6, 129.0, 128.9, 128.7, 128.4, 128.1, 55.5, 39.7, 21.0, 21.0. HRMS (ESI-TOF) for  $\text{C}_{23}\text{H}_{23}\text{O}$  ( $[\text{M}+\text{H}]^+$ ): calcd. 315.1743; found: 315.1748.

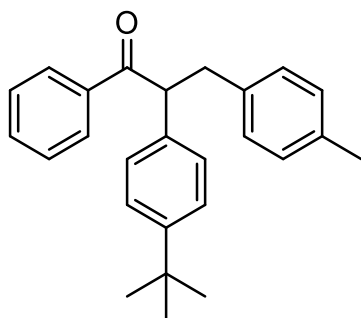

**2-(4-(tert-butyl)phenyl)-1-phenyl-3-(p-tolyl)propan-1-one (4t)**: Purification by column chromatography (silica gel, PE/EA = 30:1) afforded **4t** (57%, 41.1 mg) as a white solid (110–112 °C).  $^1\text{H}$  NMR (400 MHz,  $\text{CDCl}_3$ )  $\delta$  7.90 (d,  $J = 7.4$  Hz, 2H), 7.44 (t,  $J = 7.3$  Hz, 1H), 7.34 (t,  $J = 7.7$  Hz,

2H), 7.28 (d,  $J = 8.3$  Hz, 2H), 7.20 (d,  $J = 8.3$  Hz, 2H), 7.00 (s, 4H), 4.81 (dd,  $J = 8.4, 5.9$  Hz, 1H), 3.56 (dd,  $J = 13.8, 8.5$  Hz, 1H), 2.99 (dd,  $J = 13.8, 5.9$  Hz, 1H), 2.26 (s, 3H), 1.26 (s, 9H).  $^{13}\text{C}$   $\{^1\text{H}\}$  NMR (101 MHz,  $\text{CDCl}_3$ )  $\delta$  199.4, 149.9, 137.0, 137.0, 136.2, 135.5, 132.7, 129.0, 128.9, 128.7, 128.4, 127.8, 125.8, 55.3, 39.8, 34.4, 31.3, 21.0. HRMS (ESI-TOF) for  $\text{C}_{26}\text{H}_{29}\text{O}$  ( $[\text{M}+\text{H}]^+$ ): calcd. 357.2213; found: 357.2222.

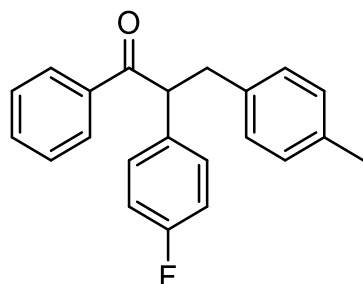

**2-(4-fluorophenyl)-1-phenyl-3-(p-tolyl)propan-1-one (4u):** Purification by column chromatography (silica gel, PE/EA = 30:1) afforded **4u** (47%, 30.1 mg) as a yellow solid (85-87 °C).  $^1\text{H}$  NMR (400 MHz,  $\text{CDCl}_3$ )  $\delta$  7.88 (d,  $J = 7.3$  Hz, 2H), 7.46 (t,  $J = 7.4$  Hz, 1H), 7.35 (t,  $J = 7.6$  Hz, 2H), 7.21 – 7.16 (m, 2H), 7.00 (d,  $J = 7.9$  Hz, 2H), 6.98 – 6.89 (m, 4H), 4.77 (t,  $J = 7.3$  Hz, 1H), 3.48 (dd,  $J = 13.8, 7.1$  Hz, 1H), 3.00 (dd,  $J = 13.8, 7.4$  Hz, 1H), 2.26 (s, 3H).  $^{13}\text{C}$   $\{^1\text{H}\}$  NMR (101 MHz,  $\text{CDCl}_3$ )  $\delta$  199.3, 161.9 (d,  $J = 245.8$  Hz), 136.6, 136.3, 135.7, 134.8 (d,  $J = 3.1$  Hz), 133.0, 129.8 (d,  $J = 8.0$  Hz), 129.0, 128.6, 128.5, 115.7 (d,  $J = 21.4$  Hz), 55.0, 39.7, 21.0.  $^{19}\text{F}$  NMR (377 MHz,  $\text{CDCl}_3$ )  $\delta$  -115.38. HRMS (ESI-TOF) for  $\text{C}_{22}\text{H}_{20}\text{FO}$  ( $[\text{M}+\text{H}]^+$ ): calcd. 319.1493; found: 319.1492.

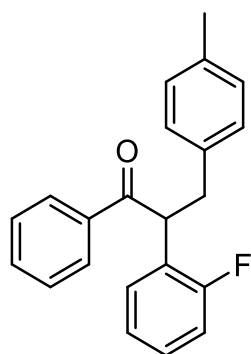

**2-(2-fluorophenyl)-1-phenyl-3-(p-tolyl)propan-1-one (4v):** Purification by column chromatography (silica gel, PE/EA = 30:1) afforded **4v** (45%, 28.9 mg) as a colorless liquid.  $^1\text{H}$  NMR (400 MHz,  $\text{CDCl}_3$ )  $\delta$  7.92 (d,  $J = 7.5$  Hz, 2H), 7.46 (t,  $J = 7.4$  Hz, 1H), 7.36 (t,  $J = 7.6$  Hz, 2H), 7.29 (td,  $J = 7.6, 1.6$  Hz, 1H), 7.20 – 7.13 (m, 1H), 7.08 – 6.96 (m, 6H), 5.22 (t,  $J = 7.3$  Hz, 1H), 3.51 (dd,  $J = 13.8, 7.7$  Hz, 1H), 3.01 (dd,  $J = 13.8, 6.8$  Hz, 1H), 2.26 (s, 3H).  $^{13}\text{C}$   $\{^1\text{H}\}$  NMR (101 MHz,  $\text{CDCl}_3$ )  $\delta$  198.7, 159.9 (d,  $J = 245.2$  Hz), 136.3, 136.3, 135.7, 133.1, 129.0 (d,  $J = 3.4$  Hz), 129.0, 128.9, 128.8 (d,  $J = 8.4$  Hz), 128.6, 128.5, 126.4 (d,  $J = 15.0$  Hz), 124.6 (d,  $J = 3.4$  Hz), 115.7 (d,  $J = 22.8$  Hz), 46.9, 38.6, 21.0.  $^{19}\text{F}$  NMR (377 MHz,  $\text{CDCl}_3$ )  $\delta$  -118.56. HRMS (ESI-TOF) for  $\text{C}_{22}\text{H}_{20}\text{FO}$  ( $[\text{M}+\text{H}]^+$ ): calcd. 319.1493; found: 319.1488.

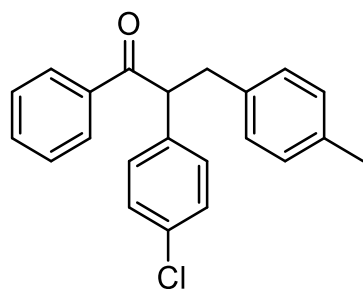

**2-(4-chlorophenyl)-1-phenyl-3-(p-tolyl)propan-1-one (4w):** Purification by column chromatography (silica gel, PE/EA = 30:1) afforded **4w** (62%, 41.8 mg) as a white solid (116-117 °C). <sup>1</sup>H NMR (400 MHz, CDCl<sub>3</sub>) δ 7.87 (d, *J* = 7.6 Hz, 2H), 7.47 (t, *J* = 7.4 Hz, 1H), 7.36 (t, *J* = 7.7 Hz, 2H), 7.19 (dd, *J* = 26.9, 8.5 Hz, 4H), 6.97 (dd, *J* = 25.3, 7.9 Hz, 4H), 4.76 (t, *J* = 7.3 Hz, 1H), 3.48 (dd, *J* = 13.8, 7.1 Hz, 1H), 3.00 (dd, *J* = 13.8, 7.5 Hz, 1H), 2.27 (s, 3H). <sup>13</sup>C {<sup>1</sup>H} NMR (101 MHz, CDCl<sub>3</sub>) δ 199.0, 137.6, 136.5, 136.2, 135.7, 133.0, 129.7, 129.0, 129.0, 128.9, 128.6, 128.6, 55.2, 39.6, 21.0. HRMS (ESI-TOF) for C<sub>22</sub>H<sub>20</sub>ClO ([M+H]<sup>+</sup>): calcd. 335.1197; found: 335.1197.

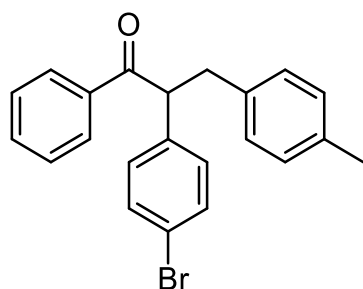

**2-(4-bromophenyl)-1-phenyl-3-(p-tolyl)propan-1-one (4x):** Purification by column chromatography (silica gel, PE/EA = 30:1) afforded **4x** (35%, 26.1 mg) as a white solid (145-146 °C). <sup>1</sup>H NMR (400 MHz, CDCl<sub>3</sub>) δ 7.87 (d, *J* = 7.4 Hz, 2H), 7.47 (t, *J* = 7.4 Hz, 1H), 7.39 – 7.33 (m, 4H), 7.10 (d, *J* = 8.4 Hz, 2H), 6.97 (dd, *J* = 25.4, 7.9 Hz, 4H), 4.75 (t, *J* = 7.3 Hz, 1H), 3.48 (dd, *J* = 13.8, 7.1 Hz, 1H), 2.99 (dd, *J* = 13.8, 7.4 Hz, 1H), 2.26 (s, 3H). <sup>13</sup>C {<sup>1</sup>H} NMR (101 MHz, CDCl<sub>3</sub>) δ 199.0, 138.1, 136.5, 136.1, 135.7, 133.0, 132.0, 130.0, 129.0, 128.9, 128.6, 128.6, 121.1, 55.2, 39.5, 21.0. HRMS (ESI-TOF) for C<sub>22</sub>H<sub>20</sub>BrO ([M+H]<sup>+</sup>): calcd. 379.0692; found: 379.0679.

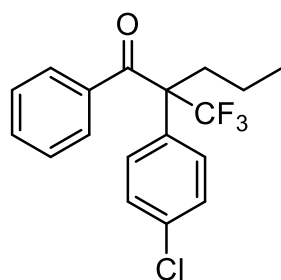

**2-(4-chlorophenyl)-1-phenyl-2-(trifluoromethyl)pentan-1-one (5a):** Purification by column chromatography (silica gel, PE/EA = 30:1) afforded **5a** (56%, 38.2 mg) as a white solid (88-89 °C). <sup>1</sup>H NMR (400 MHz, CDCl<sub>3</sub>) δ 7.50 – 7.41 (m, 3H), 7.41 – 7.31 (m, 4H), 7.29 – 7.25 (m, 2H), 2.66 – 2.55 (m, 1H), 2.32 (t, *J* = 12.4 Hz, 1H), 1.70 – 1.58 (m, 1H), 1.15 – 1.01 (m, 1H), 0.79 (t, *J* = 7.3 Hz, 3H). <sup>13</sup>C {<sup>1</sup>H} NMR (101 MHz, CDCl<sub>3</sub>) δ 194.6, 135.4, 135.1, 134.3, 132.8, 129.9, 129.5, 129.2, 128.4, 125.7 (d, *J* = 284.8 Hz), 63.21 (q, *J* = 22.5 Hz), 35.8, 18.1, 14.8. <sup>19</sup>F NMR (377 MHz, CDCl<sub>3</sub>)

$\delta$  -68.03. HRMS (ESI-TOF) for  $C_{18}H_{17}ClF_3O$  ( $[M+H]^+$ ): calcd. 341.0915; found: 341.0913.

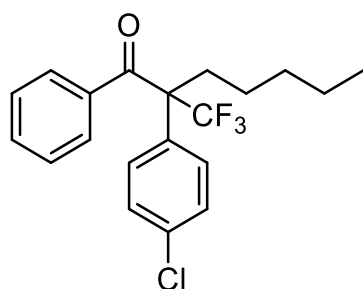

**2-(4-chlorophenyl)-1-phenyl-2-(trifluoromethyl)heptan-1-one (5b):** Purification by column chromatography (silica gel, PE/EA = 30:1) afforded **5b** (45%, 33.6 mg) as a colorless liquid.  $^1H$  NMR (400 MHz,  $CDCl_3$ )  $\delta$  7.47 – 7.42 (m, 3H), 7.40 – 7.32 (m, 4H), 7.29 – 7.24 (m, 2H), 2.66 – 2.56 (m, 1H), 2.39 – 2.28 (m, 1H), 1.69 – 1.53 (m, 1H), 1.26 – 1.01 (m, 5H), 0.72 (t,  $J = 7.1$  Hz, 3H).  $^{13}C$  { $^1H$ } NMR (101 MHz,  $CDCl_3$ )  $\delta$  194.8, 135.4, 135.1, 134.3, 132.8, 129.9, 129.5, 129.2, 128.3, 125.8 (d,  $J = 285.0$  Hz), 63.1 (q,  $J = 22.5$  Hz), 33.5, 32.3, 24.2, 21.8, 13.7.  $^{19}F$  NMR (377 MHz,  $CDCl_3$ )  $\delta$  -67.96. HRMS (ESI-TOF) for  $C_{20}H_{21}ClF_3O$  ( $[M+H]^+$ ): calcd. 369.1228; found: 369.1229.

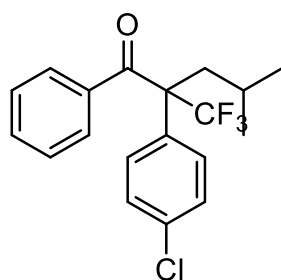

**2-(4-chlorophenyl)-4-methyl-1-phenyl-2-(trifluoromethyl)pentan-1-one (5c):** Purification by column chromatography (silica gel, PE/EA = 30:1) afforded **5c** (54%, 38.4 mg) as a white solid (64–65 °C).  $^1H$  NMR (400 MHz,  $CDCl_3$ )  $\delta$  7.47 – 7.40 (m, 3H), 7.40 – 7.33 (m, 4H), 7.29 – 7.24 (m, 2H), 2.63 – 2.55 (m, 1H), 2.37 – 2.28 (m, 1H), 1.85 – 1.73 (m, 1H), 0.97 (d,  $J = 6.6$  Hz, 3H), 0.42 (d,  $J = 6.7$  Hz, 3H).  $^{13}C$  { $^1H$ } NMR (101 MHz,  $CDCl_3$ )  $\delta$  195.4, 135.8, 135.2, 134.3, 132.8, 130.0, 129.9, 129.1, 128.3, 125.6 (d,  $J = 284.8$  Hz), 63.4 (q,  $J = 22.6$  Hz), 42.0, 24.9, 24.3.  $^{19}F$  NMR (377 MHz,  $CDCl_3$ )  $\delta$  -67.55. HRMS (ESI-TOF) for  $C_{19}H_{19}ClF_3O$  ( $[M+H]^+$ ): calcd. 355.1071; found: 355.1068.

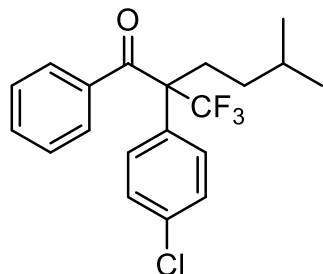

**2-(4-chlorophenyl)-5-methyl-1-phenyl-2-(trifluoromethyl)hexan-1-one (5d):** Purification by column chromatography (silica gel, PE/EA = 30:1) afforded **5d** (28%, 20.7 mg) as a white solid (103–104 °C).  $^1H$  NMR (400 MHz,  $CDCl_3$ )  $\delta$  7.48 – 7.42 (m, 3H), 7.42 – 7.35 (m, 4H), 7.29 – 7.25 (m, 2H), 2.68 – 2.56 (m, 1H), 2.41 – 2.27 (m, 1H), 1.56 – 1.47 (m, 1H), 1.38 – 1.28 (m, 1H), 0.94 – 0.84 (m, 1H), 0.78 (d,  $J = 6.6$  Hz, 3H), 0.58 (d,  $J = 6.6$  Hz, 3H).  $^{13}C$  { $^1H$ } NMR (101 MHz,  $CDCl_3$ )

$\delta$  194.9, 135.5, 135.2, 134.3, 132.8, 129.9, 129.5, 129.2, 128.3, 125.7 (d,  $J = 285.2$  Hz), 63.1 (q,  $J = 22.4$  Hz), 33.2, 31.4, 28.5, 22.2, 21.6.  $^{19}\text{F}$  NMR (377 MHz,  $\text{CDCl}_3$ )  $\delta$  -67.84. HRMS (ESI-TOF) for  $\text{C}_{20}\text{H}_{21}\text{ClF}_3\text{O}$  ( $[\text{M}+\text{H}]^+$ ): calcd. 369.1228; found: 369.1234.

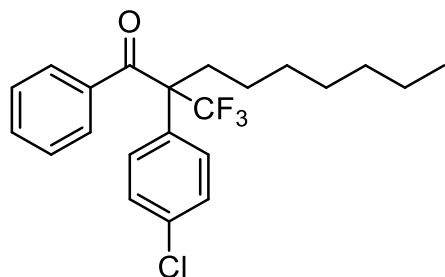

**2-(4-chlorophenyl)-1-phenyl-2-(trifluoromethyl)nonan-1-one (5e):** Purification by column chromatography (silica gel, PE/EA = 30:1) afforded **5e** (29%, 23.2 mg) as a colorless liquid.  $^1\text{H}$  NMR (400 MHz,  $\text{CDCl}_3$ )  $\delta$  7.50 – 7.41 (m, 3H), 7.41 – 7.32 (m, 4H), 7.29 – 7.25 (m, 2H), 2.69 – 2.54 (m, 1H), 2.33 (t,  $J = 12.7$  Hz, 1H), 1.66 – 1.57 (m, 1H), 1.25 – 0.99 (m, 9H), 0.80 (t,  $J = 7.1$  Hz, 3H).  $^{13}\text{C}$  { $^1\text{H}$ } NMR (101 MHz,  $\text{CDCl}_3$ )  $\delta$  194.8, 135.4, 135.1, 134.3, 132.8, 129.9, 129.5, 129.2, 128.3, 125.7 (d,  $J = 285.0$  Hz), 63.1 (q,  $J = 22.4$  Hz), 33.5, 31.4, 30.0, 28.4, 24.4, 22.5, 14.0.  $^{19}\text{F}$  NMR (377 MHz,  $\text{CDCl}_3$ )  $\delta$  -68.00. HRMS (ESI-TOF) for  $\text{C}_{22}\text{H}_{25}\text{ClF}_3\text{O}$  ( $[\text{M}+\text{H}]^+$ ): calcd. 397.1541; found: 397.1461.

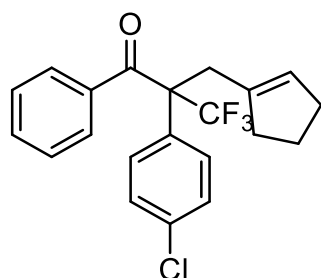

**2-(4-chlorophenyl)-2-(cyclopent-1-en-1-ylmethyl)-3,3,3-trifluoro-1-phenylpropan-1-one (5f):** Purification by column chromatography (silica gel, PE/EA = 30:1) afforded **5f** (28 %, 21.2 mg) as a white solid (105-106 °C).  $^1\text{H}$  NMR (400 MHz,  $\text{CDCl}_3$ )  $\delta$  7.48 – 7.40 (m, 3H), 7.40 – 7.33 (m, 4H), 7.28 – 7.23 (m, 2H), 5.27 (s, 1H), 3.39 (dd,  $J = 84.0, 15.1$  Hz, 2H), 2.18 – 2.06 (m, 2H), 2.01 – 1.86 (m, 2H), 1.66 (p,  $J = 7.5$  Hz, 2H).  $^{13}\text{C}$  { $^1\text{H}$ } NMR (101 MHz,  $\text{CDCl}_3$ )  $\delta$  194.9, 137.1, 135.7, 135.2, 134.1, 132.6, 131.2, 123.0, 129.9, 129.1, 128.2, 125.3 (d,  $J = 284.8$  Hz), 63.3 (q,  $J = 22.5$  Hz), 35.9, 35.1, 32.4, 23.7.  $^{19}\text{F}$  NMR (377 MHz,  $\text{CDCl}_3$ )  $\delta$  -67.40. HRMS (ESI-TOF) for  $\text{C}_{21}\text{H}_{19}\text{ClF}_3\text{O}$  ( $[\text{M}+\text{H}]^+$ ): calcd. 379.1071; found: 379.1073.

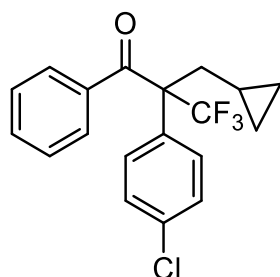

**2-(4-chlorophenyl)-2-(cyclopropylmethyl)-3,3,3-trifluoro-1-phenylpropan-1-one (5g):** Purification by column chromatography (silica gel, PE/EA = 30:1) afforded **5g** (26 %, 18.4 mg) as a white solid (77-78 °C).  $^1\text{H}$  NMR (400 MHz,  $\text{CDCl}_3$ )  $\delta$  7.49 – 7.41 (m, 3H), 7.39 – 7.34 (m, 2H), 7.33 – 7.23 (m, 4H), 2.74 – 2.63 (m, 1H), 2.33 – 2.21 (m, 1H), 0.84 – 0.71 (m, 1H), 0.51 – 0.42 (m,

1H), 0.27 – 0.17 (m, 1H), 0.13 – 0.02 (m, 1H), -0.40 – -0.50 (m, 1H). <sup>13</sup>C {1H} NMR (101 MHz, CDCl<sub>3</sub>) δ 194.6 135.7, 135.1, 134.4 132.8, 129.9 129.8, 129.1, 128.3 125.7(d, *J* = 284.9 Hz), 63.5 (q, *J* = 22.4 Hz), 38.6, 6.6– 6.4(m), 6.1, 5.6. <sup>19</sup>F NMR (377 MHz, CDCl<sub>3</sub>) δ -67.39. HRMS (ESI-TOF) for C<sub>19</sub>H<sub>17</sub>ClF<sub>3</sub>O ([M+H]<sup>+</sup>): calcd. 353.0915; found: 353.0917.

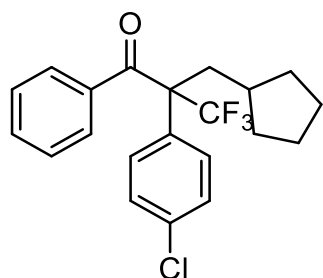

**2-(4-chlorophenyl)-2-(cyclopentylmethyl)-3,3,3-trifluoro-1-phenylpropan-1-one (5h):**

Purification by column chromatography (silica gel, PE/EA = 30:1) afforded **5h** (44 %, 33.6 mg) as a white solid (76-77 °C). <sup>1</sup>H NMR (400 MHz, CDCl<sub>3</sub>) δ 7.48 – 7.40 (m, 3H), 7.40 – 7.32 (m, 4H), 7.28 – 7.24 (m, 2H), 2.83 – 2.71 (m, 1H), 2.58 – 2.43 (m, 1H), 1.94 – 1.79 (m, 2H), 1.56 – 1.36 (m, 3H), 1.32 – 1.23 (m, 1H), 1.22 – 1.06 (m, 2H), 0.68 – 0.50 (m, 1H). <sup>13</sup>C {1H} NMR (101 MHz, CDCl<sub>3</sub>) δ 195.4, 135.6, 135.1, 134.4, 132.7, 130.0, 129.8, 129.1, 128.3, 125.6 (d, *J* = 284.7 Hz), 63.5 (q, *J* = 22.5 Hz), 39.8, 36.7, 34.8, 34.6, 24.9, 24.5. <sup>19</sup>F NMR (377 MHz, CDCl<sub>3</sub>) δ -67.73. HRMS (ESI-TOF) for C<sub>21</sub>H<sub>21</sub>ClF<sub>3</sub>O ([M+H]<sup>+</sup>): calcd. 381.1228; found: 381.1225.

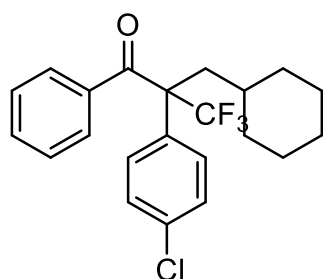

**2-(4-chlorophenyl)-2-(cyclohexylmethyl)-3,3,3-trifluoro-1-phenylpropan-1-one (5i):**

Purification by column chromatography (silica gel, PE/EA = 30:1) afforded **5i** (37 %, 29.5 mg) as a white solid (124-125°C). <sup>1</sup>H NMR (400 MHz, CDCl<sub>3</sub>) δ 7.48 – 7.32 (m, 7H), 7.28 – 7.24 (m, 2H), 2.52 (dd, *J* = 15.0, 4.5 Hz, 1H), 2.31 – 2.19 (m, 1H), 1.83 (d, *J* = 12.6 Hz, 1H), 1.67 – 1.59 (m, 1H), 1.55 – 1.46 (m, 1H), 1.45 – 1.32 (m, 2H), 1.25 – 1.12 (m, 1H), 1.08 – 0.87 (m, 3H), 0.75 – 0.67 (m, 1H), 0.61 – 0.49 (m, 1H). <sup>13</sup>C {1H} NMR (101 MHz, CDCl<sub>3</sub>) δ 195.5, 135.8, 135.2, 134.3, 132.7, 130.0, 129.8, 129.1, 128.3, 125.6 (d, *J* = 284.9 Hz), 63.2 (q, *J* = 22.5 Hz), 40.6, 35.2, 34.8, 34.2, 26.4, 26.3, 25.9. <sup>19</sup>F NMR (377 MHz, CDCl<sub>3</sub>) δ -67.78. HRMS (ESI-TOF) for C<sub>22</sub>H<sub>23</sub>ClF<sub>3</sub>O ([M+H]<sup>+</sup>): calcd. 395.1384; found: 395.1373.

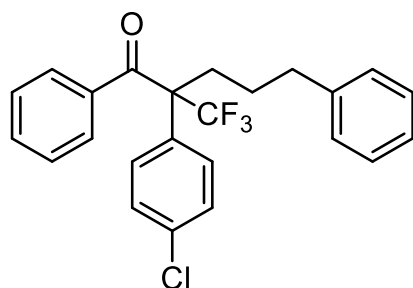

**2-(4-chlorophenyl)-1,5-diphenyl-2-(trifluoromethyl)pentan-1-one (5j):** Purification by column

chromatography (silica gel, PE/EA = 30:1) afforded **5j** (65%, 54.3 mg) as a colorless liquid.  $^1\text{H}$  NMR (400 MHz,  $\text{CDCl}_3$ )  $\delta$  7.47 – 7.41 (m, 1H), 7.40 – 7.27 (m, 6H), 7.25 – 7.20 (m, 2H), 7.19 – 7.09 (m, 3H), 6.89 (d,  $J = 7.3$  Hz, 2H), 2.68 – 2.54 (m, 2H), 2.44 – 2.29 (m, 2H), 2.04 – 1.91 (m, 1H), 1.48 – 1.34 (m, 1H).  $^{13}\text{C}$  { $^1\text{H}$ } NMR (101 MHz,  $\text{CDCl}_3$ )  $\delta$  194.6, 140.6, 135.2, 135.2, 134.1, 132.9, 129.8, 129.5, 129.2, 128.4, 128.2, 125.7 (d,  $J = 285.0$  Hz), 126.0, 63.1 (q,  $J = 22.5$  Hz), 36.0, 32.9, 25.7.  $^{19}\text{F}$  NMR (377 MHz,  $\text{CDCl}_3$ )  $\delta$  -67.81, -67.82. HRMS (ESI-TOF) for  $\text{C}_{24}\text{H}_{21}\text{ClF}_3\text{O}$  ( $[\text{M}+\text{H}]^+$ ): calcd. 417.1228; found: 417.1224.

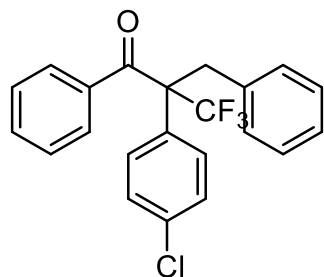

**2-benzyl-2-(4-chlorophenyl)-3,3,3-trifluoro-1-phenylpropan-1-one (5k)**: Purification by column chromatography (silica gel, PE/EA = 30:1) afforded **5k** (13%, 10.5 mg) as a white solid (91-92°C).  $^1\text{H}$  NMR (400 MHz,  $\text{CDCl}_3$ )  $\delta$  7.51 – 7.43 (m, 3H), 7.39 – 7.34 (m, 2H), 7.29 (d,  $J = 7.8$  Hz, 4H), 7.16 – 7.05 (m, 3H), 6.79 (d,  $J = 7.3$  Hz, 2H), 3.83 (dd,  $J = 81.1, 14.3$  Hz, 2H).  $^{13}\text{C}$  { $^1\text{H}$ } NMR (101 MHz,  $\text{CDCl}_3$ )  $\delta$  193.9, 135.8, 135.1, 134.5, 133.8, 132.9, 130.9, 130.4, 130.0, 129.1, 128.3, 127.8, 127.1, 125.4 (d,  $J = 285.5$  Hz), 65.3 (q,  $J = 22.1$  Hz), 39.6.  $^{19}\text{F}$  NMR (377 MHz,  $\text{CDCl}_3$ )  $\delta$  -64.64. HRMS (ESI-TOF) for  $\text{C}_{22}\text{H}_{17}\text{ClF}_3\text{O}$  ( $[\text{M}+\text{H}]^+$ ): calcd. 389.0915; found: 389.0931.

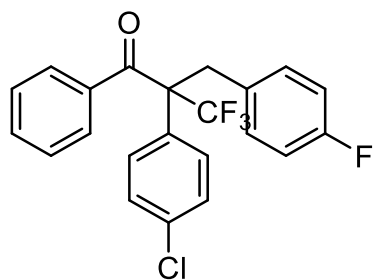

**2-(4-chlorophenyl)-3,3,3-trifluoro-2-(4-fluorobenzyl)-1-phenylpropan-1-one (5l)**: Purification by column chromatography (silica gel, PE/EA = 30:1) afforded **5l** (9%, 7.5 mg) as a white solid (170-171°C).  $^1\text{H}$  NMR (400 MHz,  $\text{CDCl}_3$ )  $\delta$  7.51 – 7.44 (m, 3H), 7.40 – 7.34 (m, 2H), 7.31 – 7.24 (m, 4H), 6.82 – 6.70 (m, 4H), 3.78 (dd,  $J = 92.0, 14.4$  Hz, 2H).  $^{13}\text{C}$  { $^1\text{H}$ } NMR (101 MHz,  $\text{CDCl}_3$ )  $\delta$  193.8, 162.0 (d,  $J = 246.1$  Hz), 135.7, 135.1, 133.6, 133.0, 132.5 (d,  $J = 7.9$  Hz), 130.4, 130.2 (d,  $J = 3.4$  Hz), 129.9, 129.2, 128.3, 125.4 (d,  $J = 285.6$  Hz), 114.7 (d,  $J = 21.2$  Hz), 65.35 (q,  $J = 21.2$  Hz), 38.9.  $^{19}\text{F}$  NMR (377 MHz,  $\text{CDCl}_3$ )  $\delta$  -64.41, -115.45. HRMS (ESI-TOF) for  $\text{C}_{22}\text{H}_{16}\text{ClF}_4\text{O}$  ( $[\text{M}+\text{H}]^+$ ): calcd. 407.0820; found: 407.0838.

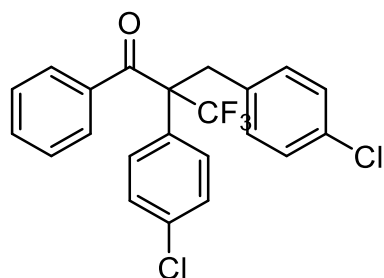

**2-(4-chlorobenzyl)-2-(4-chlorophenyl)-3,3,3-trifluoro-1-phenylpropan-1-one (5m)**:

Purification by column chromatography (silica gel, PE/EA = 30:1) afforded **5m** (25%, 21.4 mg) as a white solid (107-108 °C). <sup>1</sup>H NMR (400 MHz, CDCl<sub>3</sub>) δ 7.50 – 7.44 (m, 3H), 7.40 – 7.34 (m, 2H), 7.30 – 7.24 (m, 4H), 7.09 – 7.02 (m, 2H), 6.71 (d, *J* = 8.4 Hz, 2H), 3.76 (dd, *J* = 88.0, 14.4 Hz, 2H). <sup>13</sup>C {<sup>1</sup>H} NMR (101 MHz, CDCl<sub>3</sub>) δ 193.7, 135.63, 135.2, 133.5, 133.1, 133.1, 133.0, 132.3, 130.4, 129.8, 129.2, 128.3, 128.0, 125.3 (d, *J* = 285.7 Hz), 65.4 (q, *J* = 22.1 Hz), 39.17. <sup>19</sup>F NMR (377 MHz, CDCl<sub>3</sub>) δ -64.29. HRMS (ESI-TOF) for C<sub>22</sub>H<sub>16</sub>Cl<sub>2</sub>F<sub>3</sub>O ([M+H]<sup>+</sup>): calcd. 423.0525; found: 423.0529.

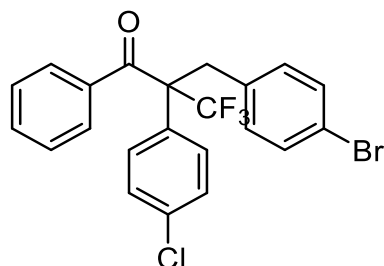

**2-(4-bromobenzyl)-2-(4-chlorophenyl)-3,3,3-trifluoro-1-phenylpropan-1-one (5n)**: Purification by column chromatography (silica gel, PE/EA = 30:1) afforded **5n** (24%, 22.5 mg) as a white solid (124-125 °C). <sup>1</sup>H NMR (400 MHz, CDCl<sub>3</sub>) δ 7.50 – 7.44 (m, 3H), 7.40 – 7.34 (m, 2H), 7.31 – 7.19 (m, 6H), 6.64 (d, *J* = 8.4 Hz, 2H), 3.74 (dd, *J* = 87.1, 14.4 Hz, 2H). <sup>13</sup>C {<sup>1</sup>H} NMR (101 MHz, CDCl<sub>3</sub>) δ 193.7, 135.6, 135.2, 133.6, 133.4, 133.1, 132.7, 131.0, 130.4, 129.8, 129.2, 128.4, 126.7, 121.3, 65.3 (q, *J* = 22.3 Hz), 39.2. <sup>19</sup>F NMR (377 MHz, CDCl<sub>3</sub>) δ -64.25. HRMS (ESI-TOF) for C<sub>22</sub>H<sub>16</sub>BrClF<sub>3</sub>O ([M+H]<sup>+</sup>): calcd. 467.0020; found: 467.0024.

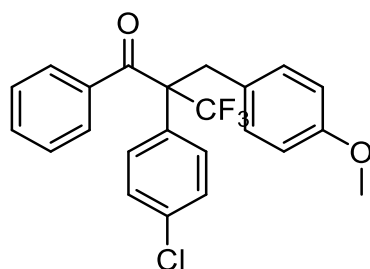

**2-(4-chlorophenyl)-3,3,3-trifluoro-2-(4-methoxybenzyl)-1-phenylpropan-1-one (5o)**: Purification by column chromatography (silica gel, PE/EA = 30:1) afforded **5o** (62%, 52.1 mg) as a white solid (129-130 °C). <sup>1</sup>H NMR (400 MHz, CDCl<sub>3</sub>) δ 7.52 – 7.43 (m, 3H), 7.39 – 7.33 (m, 2H), 7.32 – 7.24 (m, 4H), 6.73 – 6.66 (m, 2H), 6.65 – 6.57 (m, 2H), 3.89 (d, *J* = 14.5 Hz, 1H), 3.75 – 3.64 (m, 4H). <sup>13</sup>C {<sup>1</sup>H} NMR (101 MHz, CDCl<sub>3</sub>) δ 194.0, 158.6, 135.8, 135.0, 133.9, 132.9, 132.0, 130.4, 130.0, 129.1, 128.3, 126.3, 125.4 (d, *J* = 285.5 Hz), 113.2, 65.2 (q, *J* = 22.0 Hz), 55.1, 38.8. <sup>19</sup>F NMR (377 MHz, CDCl<sub>3</sub>) δ -64.82. HRMS (ESI-TOF) for C<sub>23</sub>H<sub>18</sub>ClF<sub>3</sub>O<sub>2</sub>Na ([M+Na]<sup>+</sup>): calcd. 441.0840; found: 441.0829.

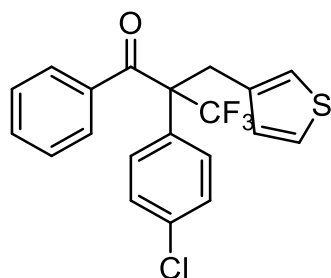

**2-(4-chlorophenyl)-3,3,3-trifluoro-1-phenyl-2-(thiophen-3-ylmethyl)propan-1-one (5p)**:

Purification by column chromatography (silica gel, PE/EA = 30:1) afforded **5p** (13%, 10.3 mg) as a white solid (130-131 °C). <sup>1</sup>H NMR (400 MHz, CDCl<sub>3</sub>) δ 7.48 – 7.43 (m, 3H), 7.40 – 7.35 (m, 2H), 7.31 – 7.25 (m, 4H), 7.04 (dd, *J* = 4.9, 3.0 Hz, 1H), 6.56 (dd, *J* = 11.3, 3.7 Hz, 2H), 3.85 (dd, *J* = 91.0, 14.8 Hz, 2H). <sup>13</sup>C {<sup>1</sup>H} NMR (101 MHz, CDCl<sub>3</sub>) δ 193.9, 135.7, 135.1, 134.2, 133.8, 133.0, 130.2, 129.9, 129.8, 129.2, 128.3, 125.4 (d, *J* = 285.3 Hz), 124.9, 124.5, 64.68 (q, *J* = 22.3 Hz), 34.15. <sup>19</sup>F NMR (377 MHz, CDCl<sub>3</sub>) δ -65.79. HRMS (ESI-TOF) for C<sub>20</sub>H<sub>15</sub>ClF<sub>3</sub>OS ([M+H]<sup>+</sup>): calcd. 395.0479; found: 395.0474.

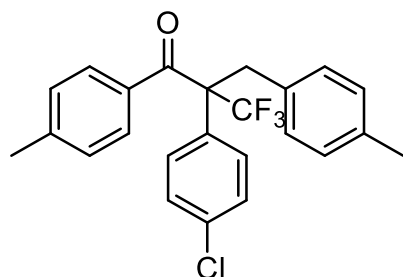

**2-(4-chlorophenyl)-3,3,3-trifluoro-2-(4-methylbenzyl)-1-(p-tolyl)propan-1-one (6a):**

Purification by column chromatography (silica gel, PE/EA = 30:1) afforded **6a** (47%, 39.2 mg) as a white solid (181-182 °C). <sup>1</sup>H NMR (400 MHz, CDCl<sub>3</sub>) δ 7.40 (d, *J* = 8.3 Hz, 2H), 7.37 – 7.32 (m, 2H), 7.32 – 7.26 (m, 2H), 7.07 (d, *J* = 8.2 Hz, 2H), 6.89 (d, *J* = 7.9 Hz, 2H), 6.68 (d, *J* = 7.9 Hz, 2H), 3.80 (dd, *J* = 70.1, 14.3 Hz, 2H), 2.34 (s, 3H), 2.23 (s, 3H). <sup>13</sup>C {<sup>1</sup>H} NMR (101 MHz, CDCl<sub>3</sub>) δ 193.4, 143.8, 136.7, 134.9, 134.2, 133.0, 131.4, 130.7, 130.6, 130.0, 129.0, 129.0, 128.6, 125.4 (d, *J* = 285.5 Hz), 65.1 (q, *J* = 22.0 Hz), 39.2, 21.6, 21.0. <sup>19</sup>F NMR (377 MHz, CDCl<sub>3</sub>) δ -64.90. HRMS (ESI-TOF) for C<sub>24</sub>H<sub>21</sub>ClF<sub>3</sub>O ([M+H]<sup>+</sup>): calcd. 417.1228; found: 417.1217.

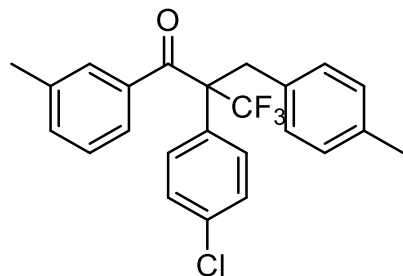

**2-(4-chlorophenyl)-3,3,3-trifluoro-2-(4-methylbenzyl)-1-(m-tolyl)propan-1-one (6b):**

Purification by column chromatography (silica gel, PE/EA = 30:1) afforded **6b** (44%, 36.8 mg) as a white solid (166-167 °C). <sup>1</sup>H NMR (400 MHz, CDCl<sub>3</sub>) δ 7.42 (s, 1H), 7.39 – 7.33 (m, 2H), 7.31 – 7.25 (m, 3H), 7.18 – 7.07 (m, 2H), 6.89 (d, *J* = 7.9 Hz, 2H), 6.68 (d, *J* = 8.0 Hz, 2H), 3.80 (dd, *J* = 65.5, 14.4 Hz, 2H), 2.28 (s, 3H), 2.24 (s, 3H). <sup>13</sup>C {<sup>1</sup>H} NMR (101 MHz, CDCl<sub>3</sub>) δ 194.1, 138.3, 136.7, 135.8, 135.0, 134.0, 133.6, 131.4, 131.0, 130.7, 130.0, 129.0, 128.6, 128.0, 127.6, 125.40 (d, *J* = 285.5 Hz), 65.3 (q, *J* = 22.0 Hz), 39.2, 21.4, 21.0. <sup>19</sup>F NMR (377 MHz, CDCl<sub>3</sub>) δ -64.78. HRMS (ESI-TOF) for C<sub>24</sub>H<sub>21</sub>ClF<sub>3</sub>O ([M+H]<sup>+</sup>): calcd. 417.1228; found: 417.1215.

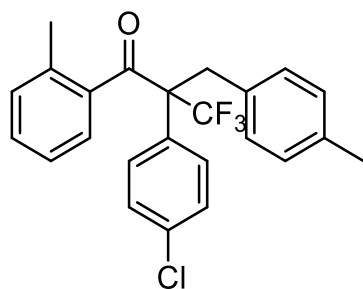

**2-(4-chlorophenyl)-3,3,3-trifluoro-2-(4-methylbenzyl)-1-(o-tolyl)propan-1-one (6c):**

Purification by column chromatography (silica gel, PE/EA = 30:1) afforded **6c** (59%, 49.2 mg) as a white solid (70-72 °C). <sup>1</sup>H NMR (400 MHz, CDCl<sub>3</sub>) δ 7.44 – 7.35 (m, 4H), 7.28 – 7.18 (m, 2H), 6.90 (t, *J* = 9.1 Hz, 3H), 6.73 (d, *J* = 7.8 Hz, 2H), 6.67 (d, *J* = 7.9 Hz, 1H), 3.66 (dd, *J* = 43.3, 14.5 Hz, 2H), 2.26 (s, 3H), 2.21 (s, 3H). <sup>13</sup>C {<sup>1</sup>H} NMR (101 MHz, CDCl<sub>3</sub>) δ 197.9, 139.1, 137.6, 136.6, 134.9, 133.6, 131.9, 131.7, 131.0, 130.9, 129.5, 129.2, 128.5, 128.0, 125.8 (d, *J* = 285.7 Hz), 124.6, 66.8 (q, *J* = 22.1 Hz), 40.2, 21.0, 20.7. <sup>19</sup>F NMR (377 MHz, CDCl<sub>3</sub>) δ -61.80. HRMS (ESI-TOF) for C<sub>24</sub>H<sub>20</sub>ClF<sub>3</sub>ONa ([M+Na]<sup>+</sup>): calcd. 439.1047; found: 439.1065.

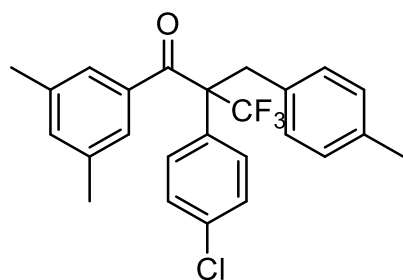

**2-(4-chlorophenyl)-1-(3,5-dimethylphenyl)-3,3,3-trifluoro-2-(4-methylbenzyl)propan-1-one (6d):**

Purification by column chromatography (silica gel, PE/EA = 30:1) afforded **6d** (50%, 43.1 mg) as a white solid (148-149 °C). <sup>1</sup>H NMR (400 MHz, CDCl<sub>3</sub>) δ 7.39 – 7.28 (m, 4H), 7.08 (s, 3H), 6.90 (d, *J* = 7.9 Hz, 2H), 6.69 (d, *J* = 7.9 Hz, 2H), 3.80 (dd, *J* = 54.1, 14.4 Hz, 2H), 2.24 (s, 3H), 2.20 (s, 6H). <sup>13</sup>C {<sup>1</sup>H} NMR (101 MHz, CDCl<sub>3</sub>) δ 194.3, 137.8, 136.7, 135.9, 134.9, 134.5, 134.1, 131.5, 130.7, 130.0, 128.9, 128.5, 128.2, 125.4 (d, *J* = 285.6 Hz), 65.3 (q, *J* = 22.0 Hz), 39.2, 21.3, 21.0. <sup>19</sup>F NMR (377 MHz, CDCl<sub>3</sub>) δ -64.75. HRMS (ESI-TOF) for C<sub>25</sub>H<sub>23</sub>ClF<sub>3</sub>O ([M+H]<sup>+</sup>): calcd. 431.1384; found: 431.1384.

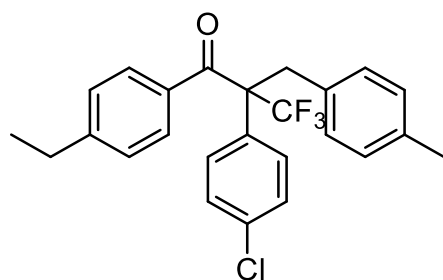

**2-(4-chlorophenyl)-1-(4-ethylphenyl)-3,3,3-trifluoro-2-(4-methylbenzyl)propan-1-one (6e):**

Purification by column chromatography (silica gel, PE/EA = 30:1) afforded **6e** (37%, 31.9 mg) as a white solid (162-164 °C). <sup>1</sup>H NMR (400 MHz, CDCl<sub>3</sub>) δ 7.42 (d, *J* = 8.4 Hz, 2H), 7.38 – 7.27 (m, 4H), 7.10 (d, *J* = 8.5 Hz, 2H), 6.89 (d, *J* = 7.9 Hz, 2H), 6.67 (d, *J* = 8.0 Hz, 2H), 3.80 (dd, *J* = 70.0, 14.3 Hz, 2H), 2.64 (q, *J* = 7.6 Hz, 2H), 2.23 (s, 3H), 1.21 (t, *J* = 7.6 Hz, 3H). <sup>13</sup>C {<sup>1</sup>H} NMR (101 MHz, CDCl<sub>3</sub>) δ 193.5, 149.9, 136.7, 134.9, 134.2, 133.2, 131.5, 130.7, 130.0, 129.0, 128.5, 127.8,

125.4 (d,  $J = 285.6$  Hz), 65.1 (q,  $J = 21.9$  Hz), 39.2, 28.8, 21.0, 14.9.  $^{19}\text{F}$  NMR (377 MHz,  $\text{CDCl}_3$ )  $\delta$  -64.86. HRMS (ESI-TOF) for  $\text{C}_{25}\text{H}_{23}\text{ClF}_3\text{O}$  ( $[\text{M}+\text{H}]^+$ ): calcd. 431.1384; found: 431.1391.

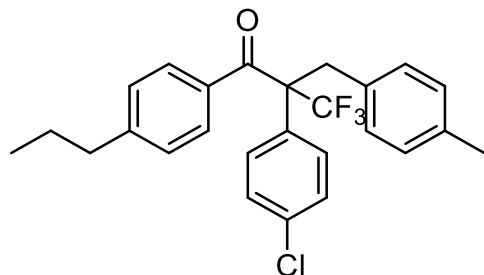

**2-(4-chlorophenyl)-3,3,3-trifluoro-2-(4-methylbenzyl)-1-(4-propylphenyl)propan-1-one (6f):** Purification by column chromatography (silica gel, PE/EA = 30:1) afforded **6f** (52%, 46.3 mg) as a white solid (122-123 °C).  $^1\text{H}$  NMR (400 MHz,  $\text{CDCl}_3$ )  $\delta$  7.41 (d,  $J = 8.2$  Hz, 2H), 7.38 – 7.28 (m, 4H), 7.07 (d,  $J = 8.3$  Hz, 2H), 6.88 (d,  $J = 7.9$  Hz, 2H), 6.66 (d,  $J = 7.8$  Hz, 2H), 3.79 (dd,  $J = 72.4, 14.3$  Hz, 2H), 2.57 (t,  $J = 7.3$  Hz, 2H), 2.23 (s, 3H), 1.67 – 1.56 (m, 2H), 0.91 (t,  $J = 7.3$  Hz, 3H).  $^{13}\text{C}$  { $^1\text{H}$ } NMR (101 MHz,  $\text{CDCl}_3$ )  $\delta$  193.5, 148.4, 136.7, 134.9, 134.2, 133.3, 131.4, 130.7, 130.6, 130.0, 129.0, 128.5, 128.4, 125.4 (d,  $J = 285.5$  Hz), 65.1 (q,  $J = 22.0$  Hz), 39.2, 37.9, 24.0, 21.0, 13.7.  $^{19}\text{F}$  NMR (377 MHz,  $\text{CDCl}_3$ )  $\delta$  -64.89. HRMS (ESI-TOF) for  $\text{C}_{26}\text{H}_{25}\text{ClF}_3\text{O}$  ( $[\text{M}+\text{H}]^+$ ): calcd. 445.1541; found: 445.1550.

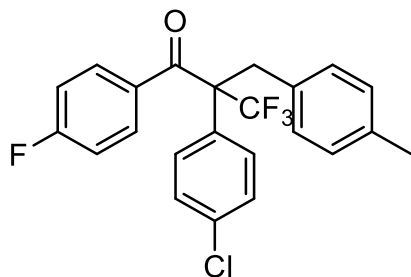

**2-(4-chlorophenyl)-3,3,3-trifluoro-1-(4-fluorophenyl)-2-(4-methylbenzyl)propan-1-one (6g):** Purification by column chromatography (silica gel, PE/EA = 30:1) afforded **6g** (35%, 29.5 mg) as a white solid (139-140 °C).  $^1\text{H}$  NMR (400 MHz,  $\text{CDCl}_3$ )  $\delta$  7.51 (dd,  $J = 8.4, 5.5$  Hz, 2H), 7.36 (d,  $J = 8.6$  Hz, 2H), 7.28 – 7.24 (m, 2H), 6.95 (t,  $J = 8.6$  Hz, 2H), 6.89 (d,  $J = 7.9$  Hz, 2H), 6.67 (d,  $J = 7.8$  Hz, 2H), 3.77 (dd,  $J = 98.3, 14.4$  Hz, 2H), 2.24 (s, 3H).  $^{13}\text{C}$  { $^1\text{H}$ } NMR (101 MHz,  $\text{CDCl}_3$ )  $\delta$  192.4, 165.2 (d,  $J = 256.5$  Hz), 136.8, 135.1, 133.8, 133.2 (d,  $J = 9.2$  Hz), 132.0, 131.2, 130.8, 130.0, 129.1, 128.6, 125.3 (d,  $J = 285.7$  Hz), 115.4 (d,  $J = 21.8$  Hz), 65.2 (q,  $J = 22.4$  Hz), 39.3, 21.0.  $^{19}\text{F}$  NMR (377 MHz,  $\text{CDCl}_3$ )  $\delta$  -64.76, -104.41. HRMS (ESI-TOF) for  $\text{C}_{23}\text{H}_{18}\text{ClF}_4\text{O}$  ( $[\text{M}+\text{H}]^+$ ): calcd. 421.0977; found: 421.0988.

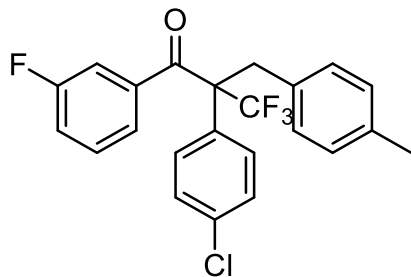

**2-(4-chlorophenyl)-3,3,3-trifluoro-1-(3-fluorophenyl)-2-(4-methylbenzyl)propan-1-one (6h):** Purification by column chromatography (silica gel, PE/EA = 30:1) afforded **6h** (67%, 56.5 mg) as a white solid (130-131 °C).  $^1\text{H}$  NMR (400 MHz,  $\text{CDCl}_3$ )  $\delta$  7.41 – 7.35 (m, 2H), 7.30 – 7.24 (m, 3H),

7.23 – 7.20 (m, 1H), 7.20 – 7.12 (m, 2H), 6.90 (d,  $J = 7.9$  Hz, 2H), 6.67 (d,  $J = 8.0$  Hz, 2H), 3.78 (dd,  $J = 86.3, 14.4$  Hz, 2H), 2.24 (s, 3H).  $^{13}\text{C}$  { $^1\text{H}$ } NMR (101 MHz,  $\text{CDCl}_3$ )  $\delta$  192.8, 162.2 (d,  $J = 247.9$  Hz), 137.8 (d,  $J = 6.5$  Hz), 136.9, 135.3, 133.5, 131.0, 130.7, 129.9, 129.8 (d,  $J = 7.8$  Hz), 129.2, 128.6, 128.5, 126.1 (d,  $J = 3.0$  Hz), 125.2 (d,  $J = 285.6$  Hz), 120.0 (d,  $J = 21.4$  Hz), 117.2 (d,  $J = 23.4$  Hz), 65.4 (q,  $J = 21.9$  Hz), 39.2, 21.0.  $^{19}\text{F}$  NMR (377 MHz,  $\text{CDCl}_3$ )  $\delta$  -64.78, -111.11. HRMS (ESI-TOF) for  $\text{C}_{23}\text{H}_{18}\text{ClF}_4\text{O}$  ( $[\text{M}+\text{H}]^+$ ): calcd. 421.0977; found: 421.0978.

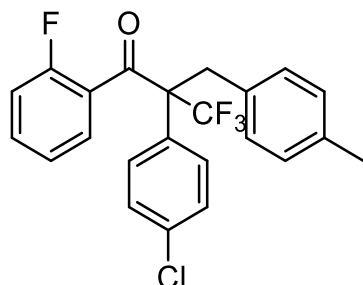

**2-(4-chlorophenyl)-3,3,3-trifluoro-1-(2-fluorophenyl)-2-(4-methylbenzyl)propan-1-one (6i):** Purification by column chromatography (silica gel, PE/EA = 30:1) afforded **6i** (77%, 64.8 mg) as a white solid (88-89 °C).  $^1\text{H}$  NMR (400 MHz,  $\text{CDCl}_3$ )  $\delta$  7.44 – 7.33 (m, 3H), 7.29 (d,  $J = 8.6$  Hz, 2H), 7.06 – 6.97 (m, 3H), 6.96 – 6.91 (m, 2H), 6.78 (d,  $J = 8.0$  Hz, 2H), 3.71 (q,  $J = 14.7$  Hz, 2H), 2.25 (s, 3H).  $^{13}\text{C}$  { $^1\text{H}$ } NMR (101 MHz,  $\text{CDCl}_3$ )  $\delta$  193.5, 159.6 (d,  $J = 255.9$  Hz), 136.7, 134.8, 133.6 (d,  $J = 8.9$  Hz), 132.8, 131.6, 130.8, 130.0, 129.7, 129.0, 128.6, 126.6 (d,  $J = 12.1$  Hz), 125.6 (d,  $J = 285.6$  Hz), 123.6 (d,  $J = 3.6$  Hz), 116.7 (d,  $J = 22.9$  Hz), 67.0 (q,  $J = 22.3$  Hz), 39.2, 21.0.  $^{19}\text{F}$  NMR (377 MHz,  $\text{CDCl}_3$ )  $\delta$  -62.73, -109.01. HRMS (ESI-TOF) for  $\text{C}_{23}\text{H}_{17}\text{ClF}_4\text{ONa}$  ( $[\text{M}+\text{Na}]^+$ ): calcd. 443.0796; found: 443.0784.

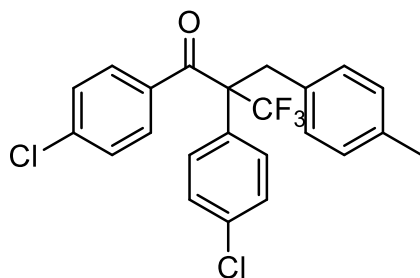

**1,2-bis(4-chlorophenyl)-3,3,3-trifluoro-2-(4-methylbenzyl)propan-1-one (6j):** Purification by column chromatography (silica gel, PE/EA = 30:1) afforded **6j** (33%, 28.9 mg) as a white solid (156-157 °C).  $^1\text{H}$  NMR (400 MHz,  $\text{CDCl}_3$ )  $\delta$  7.45 – 7.39 (m, 2H), 7.39 – 7.33 (m, 2H), 7.24 (d,  $J = 8.7$  Hz, 4H), 6.90 (d,  $J = 7.9$  Hz, 2H), 6.67 (d,  $J = 8.0$  Hz, 2H), 3.76 (dd,  $J = 96.2, 14.4$  Hz, 2H), 2.24 (s, 3H).  $^{13}\text{C}$  { $^1\text{H}$ } NMR (101 MHz,  $\text{CDCl}_3$ )  $\delta$  192.8, 139.4, 136.9, 135.2, 134.0, 133.6, 131.8, 131.1, 130.8, 130.0, 129.2, 128.6, 128.6, 125.3 (d,  $J = 285.4$  Hz), 65.3 (q,  $J = 22.3$  Hz), 39.2, 21.0.  $^{19}\text{F}$  NMR (377 MHz,  $\text{CDCl}_3$ )  $\delta$  -64.74. HRMS (ESI-TOF) for  $\text{C}_{23}\text{H}_{18}\text{Cl}_2\text{F}_3\text{O}$  ( $[\text{M}+\text{H}]^+$ ): calcd. 437.0681; found: 437.0684.

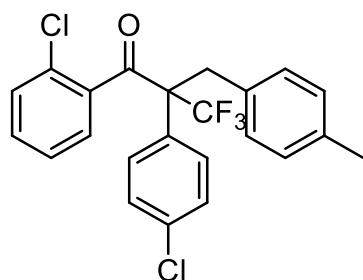

**1-(2-chlorophenyl)-2-(4-chlorophenyl)-3,3,3-trifluoro-2-(4-methylbenzyl)propan-1-one (6k):** Purification by column chromatography (silica gel, PE/EA = 30:1) afforded **6k** (38%, 33.3 mg) as a colorless liquid.  $^1\text{H}$  NMR (400 MHz,  $\text{CDCl}_3$ )  $\delta$  7.41 – 7.31 (m, 5H), 7.28 – 7.23 (m, 1H), 7.00 – 6.92 (m, 3H), 6.81 (d,  $J = 7.8$  Hz, 2H), 6.57 (d,  $J = 7.8$  Hz, 1H), 3.66 (s, 2H), 2.26 (s, 3H).  $^{13}\text{C}$  {1H} NMR (101 MHz,  $\text{CDCl}_3$ )  $\delta$  196.1, 138.0, 136.6, 134.8, 132.5, 132.0, 131.6, 131.3, 130.9, 130.8, 129.6, 129.2, 128.5, 128.1, 125.6, 125.7 (d,  $J = 285.9$  Hz), 67.7 (q,  $J = 22.9$  Hz), 40.7, 21.0.  $^{19}\text{F}$  NMR (377 MHz,  $\text{CDCl}_3$ )  $\delta$  -60.35. HRMS (ESI-TOF) for  $\text{C}_{23}\text{H}_{18}\text{Cl}_2\text{F}_3\text{O}$  ( $[\text{M}+\text{H}]^+$ ): calcd. 437.0681; found: 437.0684.

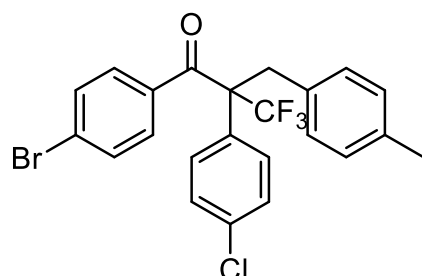

**1-(4-bromophenyl)-2-(4-chlorophenyl)-3,3,3-trifluoro-2-(4-methylbenzyl)propan-1-one (6l):** Purification by column chromatography (silica gel, PE/EA = 30:1) afforded **6l** (46%, 44.5 mg) as a white solid (155-156 °C).  $^1\text{H}$  NMR (400 MHz,  $\text{CDCl}_3$ )  $\delta$  7.48 – 7.29 (m, 6H), 7.24 (d,  $J = 8.2$  Hz, 2H), 6.90 (d,  $J = 7.9$  Hz, 2H), 6.67 (d,  $J = 7.9$  Hz, 2H), 3.76 (dd,  $J = 95.4, 14.4$  Hz, 2H), 2.24 (s, 3H).  $^{13}\text{C}$  {1H} NMR (101 MHz,  $\text{CDCl}_3$ )  $\delta$  193.0, 136.9, 135.2, 134.4, 133.6, 131.9, 131.6, 131.1, 130.7, 129.9, 129.2, 128.6, 128.2, 125.3 (d,  $J = 285.7$  Hz), 65.3 (q,  $J = 22.4$  Hz), 39.2, 21.0.  $^{19}\text{F}$  NMR (377 MHz,  $\text{CDCl}_3$ )  $\delta$  -64.72. HRMS (ESI-TOF) for  $\text{C}_{23}\text{H}_{17}\text{BrClF}_3\text{O}$  ( $[\text{M}+\text{H}]^+$ ): calcd. 481.0176; found: 481.0157.

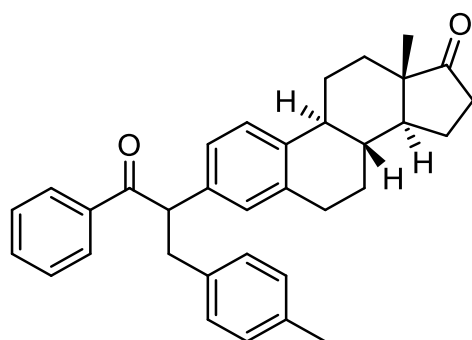

**(8R,9S,13S,14S)-13-methyl-3-(1-oxo-1-phenyl-3-(p-tolyl)propan-2-yl)-6,7,8,9,11,12,13,14,15,16-decahydro-17H-cyclopenta[a]phenanthren-17-one (7):** Purification by column chromatography (silica gel, PE/EA = 30:1) afforded **7** (29%, 13.8 mg) as a colorless liquid.  $^1\text{H}$  NMR (400 MHz,  $\text{CDCl}_3$ )  $\delta$  7.93 – 7.88 (m, 2H), 7.48 – 7.41 (m, 1H), 7.38 – 7.31 (m, 2H), 7.19 (t,  $J = 7.7$  Hz, 1H), 7.10 – 6.99 (m, 6H), 4.84 – 4.74 (m, 1H), 3.62 – 3.49 (m, 1H), 2.97 (ddd,  $J =$

13.8, 5.6, 2.0 Hz, 1H), 2.91 – 2.80 (m, 2H), 2.49 (dd,  $J = 18.8, 8.6$  Hz, 1H), 2.36 (d,  $J = 9.5$  Hz, 1H), 2.26 (s, 3H), 2.24 – 1.92 (m, 5H), 1.66 – 1.56 (m, 2H), 1.53 – 1.38 (m, 4H), 0.89 (d,  $J = 3.8$  Hz, 3H).  $^{13}\text{C}$  { $^1\text{H}$ } NMR (101 MHz,  $\text{CDCl}_3$ )  $\delta$  221.0, 199.3, 138.6, 137.1, 137.0, 136.9, 136.7, 135.6, 132.8, 129.0, 128.8, 128.5, 125.9, 125.9, 125.8, 55.3, 50.5, 48.0, 44.3, 39.8, 38.0, 35.9, 31.6, 29.4, 26.5, 25.6, 21.6, 21.0, 13.9. HRMS (ESI-TOF) for  $\text{C}_{34}\text{H}_{37}\text{O}_2$  ( $[\text{M}+\text{H}]^+$ ): calcd. 477.2788; found: 477.2799.

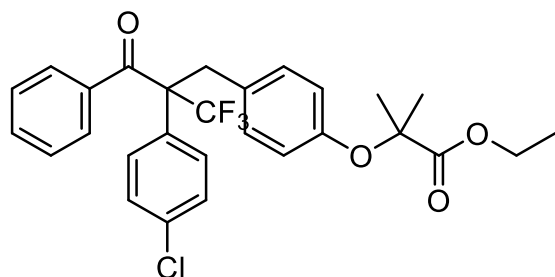

**Ethyl 2-(4-(2-benzoyl-2-(4-chlorophenyl)-3,3,3-trifluoropropyl)phenoxy)-2-methylpropanoate (8)**

Purification by column chromatography (silica gel, PE/EA = 30:1) afforded **8** (40%, 20.8 mg) as a colorless liquid.  $^1\text{H}$  NMR (400 MHz,  $\text{CDCl}_3$ )  $\delta$  7.50 – 7.40 (m, 3H), 7.38 – 7.32 (m, 2H), 7.29 – 7.23 (m, 4H), 6.64 (d,  $J = 8.7$  Hz, 2H), 6.58 – 6.50 (m, 2H), 4.19 (q,  $J = 7.1$  Hz, 2H), 3.76 (dd,  $J = 101.9, 14.5$  Hz, 2H), 1.53 (s, 6H), 1.20 (t,  $J = 7.1$  Hz, 3H).  $^{13}\text{C}$  { $^1\text{H}$ } NMR (101 MHz,  $\text{CDCl}_3$ )  $\delta$  193.9, 174.2, 154.5, 135.7, 135.0, 133.8, 132.9, 131.7, 130.4, 129.9, 129.0, 128.2, 127.9, 125.4 (d,  $J = 285.5$  Hz), 118.2, 79.0, 65.3 (q,  $J = 22.2$  Hz), 38.8, 25.3, 25.3, 14.0.  $^{19}\text{F}$  NMR (377 MHz,  $\text{CDCl}_3$ )  $\delta$  -64.78.  $^1\text{H}$  NMR (400 MHz,  $\text{CDCl}_3$ )  $\delta$  7.86 – 7.78 (m, 2H), 7.32 – 7.28 (m, 2H), 7.26 – 7.24 (m, 2H), 7.23 – 7.16 (m, 3H), 6.98 (q,  $J = 8.0$  Hz, 4H), 4.72 (t,  $J = 7.2$  Hz, 1H), 3.51 (dd,  $J = 13.8, 7.6$  Hz, 1H), 3.00 (dd,  $J = 13.8, 6.8$  Hz, 1H), 2.26 (s, 3H). HRMS (ESI-TOF) for  $\text{C}_{28}\text{H}_{27}\text{ClF}_3\text{O}_4$  ( $[\text{M}+\text{H}]^+$ ): calcd. 519.1544; found: 519.1535.

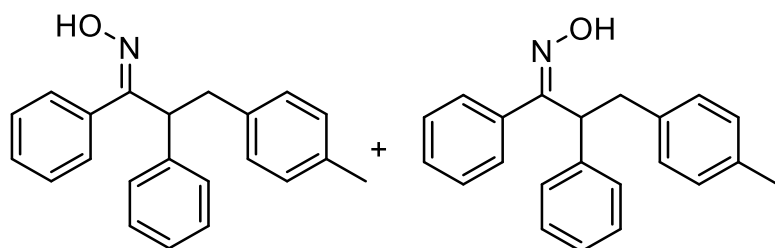

**1,2-diphenyl-3-(p-tolyl)propan-1-one oxime (9)**: Purification by column chromatography (silica gel, PE/EA = 10:1) afforded **9** (62%, 195.1 mg) as a yellow solid (66-68 °C).  $^1\text{H}$  NMR (400 MHz,  $\text{CDCl}_3$ )  $\delta$  7.42 (d,  $J = 7.5$  Hz, 2H), 7.36 – 7.29 (m, 3H), 7.26 – 7.17 (m, 11H), 7.08 – 6.96 (m, 13H), 5.30 (dd,  $J = 9.5, 6.7$  Hz, 1H), 4.06 (t,  $J = 7.7$  Hz, 1H), 3.42 (dd,  $J = 13.9, 7.5$  Hz, 1H), 3.38 – 3.24 (m, 2H), 3.06 (dd,  $J = 13.9, 7.9$  Hz, 1H), 2.29 (s, 6H).  $^{13}\text{C}$  { $^1\text{H}$ } NMR (101 MHz,  $\text{CDCl}_3$ )  $\delta$  161.5, 160.2, 140.2, 139.9, 136.8, 136.0, 135.7, 135.5, 133.9, 129.0, 128.9, 128.8, 128.8, 128.7, 128.5, 128.5, 128.4, 128.0, 128.0, 127.6, 126.9, 126.7, 53.8, 44.09, 39.2, 36.0, 21.0. HRMS (ESI-TOF) for  $\text{C}_{22}\text{H}_{22}\text{NO}$  ( $[\text{M}+\text{H}]^+$ ): calcd. 316.1696; found: 316.1710.

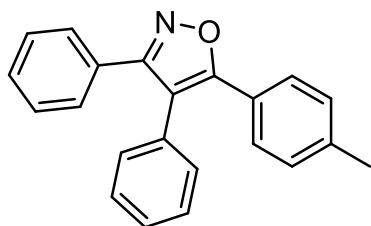

**3,4-diphenyl-5-(p-tolyl)isoxazole (10):** Purification by column chromatography (silica gel, PE/EA = 10:1) afforded **10** (86%, 40.2 mg) as a white solid (156-158 °C).  $^1\text{H}$  NMR (400 MHz,  $\text{CDCl}_3$ )  $\delta$  7.43 (m, 4H), 7.40 – 7.35 (m, 3H), 7.35 – 7.32 (m, 1H), 7.32 – 7.28 (m, 2H), 7.27 – 7.24 (m, 2H), 7.13 (d,  $J$  = 8.1 Hz, 2H), 2.34 (s, 3H).  $^{13}\text{C}$   $\{^1\text{H}\}$  NMR (101 MHz,  $\text{CDCl}_3$ )  $\delta$  165.8 162.2, 140.0, 130.8, 130.5, 129.4 129.3, 129.1, 129.0, 128.4, 128.4, 128.1, 126.9, 125.1 114.7, 21.4. HRMS (ESI-TOF) for  $\text{C}_{22}\text{H}_{18}\text{NO}$  ( $[\text{M}+\text{H}]^+$ ): calcd. 312.1383; found: 312.1396.

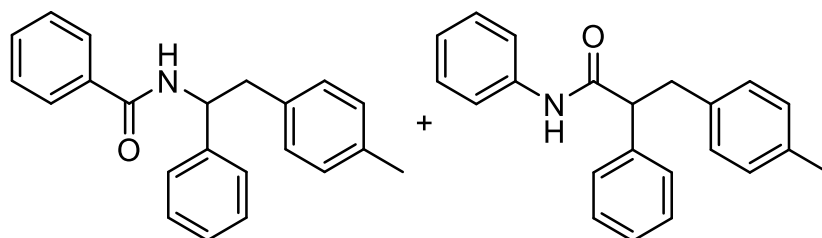

**N-(1-phenyl-2-(p-tolyl)ethyl)benzamide (11):** Purification by column chromatography (silica gel, PE/EA = 8:1) afforded **11** (57%, 18.1 mg) as a yellow solid (122-124 °C).  $^1\text{H}$  NMR (400 MHz,  $\text{CDCl}_3$ )  $\delta$  7.42 (d,  $J$  = 7.7 Hz, 2H), 7.33 (t,  $J$  = 7.5 Hz, 2H), 7.28 – 7.26 (m, 4H), 7.24 – 7.16 (m, 8H), 7.07 – 6.97 (m, 12H), 5.30 (dd,  $J$  = 9.2, 7.0 Hz, 1H), 4.06 (t,  $J$  = 7.7 Hz, 1H), 3.42 (dd,  $J$  = 13.9, 7.4 Hz, 1H), 3.37 – 3.25 (m, 2H), 3.07 (dd,  $J$  = 13.9, 8.0 Hz, 1H), 2.29 (s, 6H).  $^{13}\text{C}$   $\{^1\text{H}\}$  NMR (101 MHz,  $\text{CDCl}_3$ )  $\delta$  160.1, 140.1, 139.9, 136.7, 136.1, 135.6, 135.5, 135.5, 133.9, 129.0, 128.9, 128.9 128.7, 128.7, 128.5, 128.5, 128.4, 128.1 128.0, 127.6 126.9, 126.7, 53.8, 44.1, 39.2, 36.0, 21.0. HRMS (ESI-TOF) for  $\text{C}_{22}\text{H}_{22}\text{NO}$  ( $[\text{M}+\text{H}]^+$ ): calcd. 316.1696; found: 316.1698.

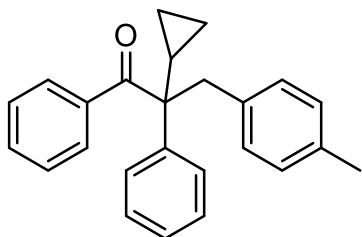

**2-cyclopropyl-1,2-diphenyl-3-(p-tolyl)propan-1-one (16):** Purification by column chromatography (silica gel, PE/EA = 30:1) afforded **16** (15%, 11.0 mg) as a colorless liquid.  $^1\text{H}$  NMR (400 MHz,  $\text{CDCl}_3$ )  $\delta$  7.55 – 7.49 (m, 2H), 7.37 (t,  $J$  = 7.4 Hz, 1H), 7.31 – 7.26 (m, 3H), 7.24 – 7.18 (m, 4H), 6.88 (d,  $J$  = 7.8 Hz, 2H), 6.65 (d,  $J$  = 8.0 Hz, 2H), 3.49 (s, 2H), 2.24 (s, 3H), 1.55 – 1.48 (m, 1H), 0.70 – 0.55 (m, 1H), 0.52 – 0.41 (m, 1H), 0.23 – 0.11 (m, 1H), 0.09 – 0.00 (m, 1H).  $^{13}\text{C}$   $\{^1\text{H}\}$  NMR (101 MHz,  $\text{CDCl}_3$ )  $\delta$  200.9, 139.8, 136.5, 135.4, 133.4, 131.3, 130.1, 123.0, 128.2, 127.8, 127.7, 127.4, 126.6, 59.2, 43.1, 20.5, 17.0, 2.9. HRMS (ESI-TOF) for  $\text{C}_{25}\text{H}_{25}\text{O}$  ( $[\text{M}+\text{H}]^+$ ): calcd. 341.1900; found: 341.1866.

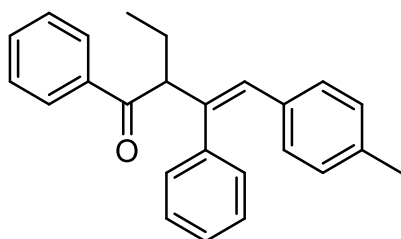

**(Z)-2-ethyl-1,3-diphenyl-4-(p-tolyl)but-3-en-1-one (17):** Purification by column chromatography (silica gel, PE/EA = 30:1) afforded **17** (10%, 6.8 mg) as a colorless liquid.  $^1\text{H}$  NMR (400 MHz,  $\text{CDCl}_3$ )  $\delta$  7.97 – 7.91 (m, 2H), 7.53 – 7.46 (m, 1H), 7.39 (t,  $J = 7.6$  Hz, 2H), 7.30 – 7.26 (m, 2H), 7.24 – 7.19 (m, 3H), 7.17 – 7.11 (m, 4H), 5.53 (s, 1H), 5.43 (t,  $J = 7.4$  Hz, 1H), 2.34 (s, 3H), 1.96 (p,  $J = 7.4$  Hz, 2H), 0.86 (t,  $J = 7.5$  Hz, 3H).  $^{13}\text{C}$  { $^1\text{H}$ } NMR (101 MHz,  $\text{CDCl}_3$ )  $\delta$  198.1, 141.1, 137.8, 137.0, 136.8, 134.4, 134.3, 132.7, 129.6, 129.3, 128.7, 128.6, 128.5, 128.1, 126.8, 61.2, 22.6, 21.1, 14.2. HRMS (ESI-TOF) for  $\text{C}_{25}\text{H}_{25}\text{O}$  ( $[\text{M}+\text{H}]^+$ ): calcd. 341.1900; found: 341.1872.

## 12. X-ray Crystallographic Analysis

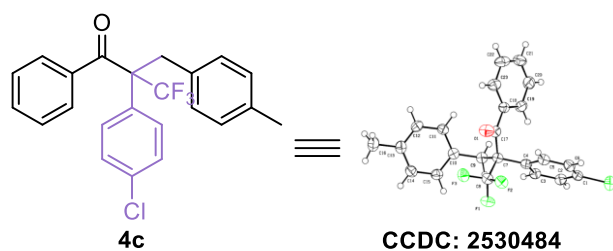

**Table S6.** Crystal data and structure refinement for **4c**

|                                  |                                                  |
|----------------------------------|--------------------------------------------------|
| Identification code              | 4c                                               |
| Empirical formula                | $\text{C}_{23}\text{H}_{18}\text{ClF}_3\text{O}$ |
| Formula weight                   | 402.82                                           |
| Temperature/K                    | 170.00                                           |
| Crystal system                   | triclinic                                        |
| Space group                      | P-1                                              |
| a/Å                              | 9.5714(6)                                        |
| b/Å                              | 9.7703(6)                                        |
| c/Å                              | 10.9823(6)                                       |
| $\alpha/^\circ$                  | 96.121(3)                                        |
| $\beta/^\circ$                   | 101.991(2)                                       |
| $\gamma/^\circ$                  | 105.078(2)                                       |
| Volume/Å <sup>3</sup>            | 955.88(10)                                       |
| Z                                | 2                                                |
| $\rho_{\text{calc}}/\text{cm}^3$ | 1.400                                            |
| $\mu/\text{mm}^{-1}$             | 0.239                                            |
| F(000)                           | 416.0                                            |
| Crystal size/mm <sup>3</sup>     | 0.18 × 0.13 × 0.1                                |

|                                                  |                                                                        |
|--------------------------------------------------|------------------------------------------------------------------------|
| Radiation                                        | MoK $\alpha$ ( $\lambda = 0.71073$ )                                   |
| 2 $\theta$ range for data collection/ $^{\circ}$ | 3.848 to 52.814                                                        |
| Index ranges                                     | -11 $\leq$ h $\leq$ 11, -12 $\leq$ k $\leq$ 12, -13 $\leq$ l $\leq$ 13 |
| Reflections collected                            | 10663                                                                  |
| Independent reflections                          | 3817 [ $R_{\text{int}} = 0.0679$ , $R_{\text{sigma}} = 0.0701$ ]       |
| Data/restraints/parameters                       | 3817/0/254                                                             |
| Goodness-of-fit on $F^2$                         | 1.052                                                                  |
| Final R indexes [ $I \geq 2\sigma(I)$ ]          | $R_1 = 0.0492$ , $wR_2 = 0.1063$                                       |
| Final R indexes [all data]                       | $R_1 = 0.0693$ , $wR_2 = 0.1236$                                       |
| Largest diff. peak/hole / e $\text{\AA}^{-3}$    | 0.22/-0.23                                                             |

---

### 13. References

- (1) Li, Z.; Luo, M.; Zeng, X. Chromium(ii)-catalyzed defluorinative reductive cross-coupling of acetals with  $\alpha$ -trifluoromethyl alkenes. *Org. Biomol. Chem.* **2025**, *23*, 5293-5297.
- (2) Rui, R.; Wang, B.; Xu, X.-J.; Zhang, Z.; Chen, X.; Liu, X.-Y. Cu-catalyzed alkylarylation of alkenes via N-directed remote C(sp<sup>3</sup>)-H functionalization. *Org. Chem. Front.* **2024**, *11*, 1484-1489.
- (3) Tang, J.; Zhao, Y.; Jin, Y.; Zhang, L.; Wang, Y.; Wu, W.; Jiang, H. Palladium-catalyzed modular biomimetic synthesis of lignans derivatives. *Chin. Chem. Lett.* **2025**, *36*, 110969.
- (4) Subaramanian, M.; Gouda, C.; Roy, T. K.; Ganesan, S.; Banerjee, S.; Vanka, K.; Balaraman, E. Dehydrogenative Coupling of Alcohols with Internal Alkynes under Nickel Catalysis: An Access to  $\beta$ -Deuterated Branched Ketones. *ACS Catal.* **2024**, *14*, 8294-8309.
- (5) Frisch, M. J.; Trucks, G. W.; Schlegel, H. B.; Scuseria, G. E.; Robb, M. A.; Cheeseman, J. R.; Scalmani, G.; Barone, V.; Mennucci, B.; Petersson, G. A.; Nakatsuji, H.; Caricato, M.; Li, X.; Hratchian, H. P.; Izmaylov, A. F.; Bloino, J.; Zheng, G.; Sonnenberg, J. L.; Hada, M.; Ehara, M.; Toyota, K.; Fukuda, R.; Hasegawa, J.; Ishida, M.; Nakajima, T.; Honda, Y.; Kitao, O.; Nakai, H.; Vreven, T.; Montgomery, J. A., Jr.; Peralta, J. E.; Ogliaro, F.; Bearpark, M.; Heyd, J. J.; Brothers, E.; Kudin, K. N.; Staroverov, V. N.; Kobayashi, R.; Normand, J.; Raghavachari, K.; Rendell, A.; Burant, J. C.; Iyengar, S. S.; Tomasi, J.; Cossi, M.; Rega, N.; Millam, N. J.; Klene, M.; Knox, J. E.; Cross, J. B.; Bakken, V.; Adamo, C.; Jaramillo, J.; Gomperts, R.; Stratmann, R. E.; Yazyev, O.; Austin, A. J.; Cammi, R.; Pomelli, C.; Ochterski, J. W.; Martin, R. L.; Morokuma, K.; Zakrzewski, V. G.; Voth, G. A.; Salvador, P.; Dannenberg, J. J.; Dapprich, S.; Daniels, A. D.; Farkas, Ö.; Foresman, J. B.; Ortiz, J. V.; Cioslowski, J., & Fox, D. J. Gaussian, Inc., Gaussian 09, Revision E.01. *Wallingford CT* **2013**.
- (6) Adamo, C.; Barone, V. *J. Chem. Phys.* **1999**, *110*, 6158-6170.
- (7) Grimme, S.; Antony, J.; Ehrlich, S.; Krieg, H. *J. Chem. Phys.* **2010**, *132*, 154104.
- (8) Weigend, F.; Ahlrichs, R. *Phys. Chem. Chem. Phys.* **2005**, *7*, 3297-3305. S39
- (9) Marenich, A. V.; Cramer, C. J.; Truhlar, D. G. *J. Phys. Chem. B* **2009**, *113*, 6378-6396.

## 14. $^1\text{H}$ NMR, $^{13}\text{C}$ NMR and $^{19}\text{F}$ NMR Spectra

### $^1\text{H}$ NMR-spectrum (400MHz, $\text{CDCl}_3$ ) of 4a

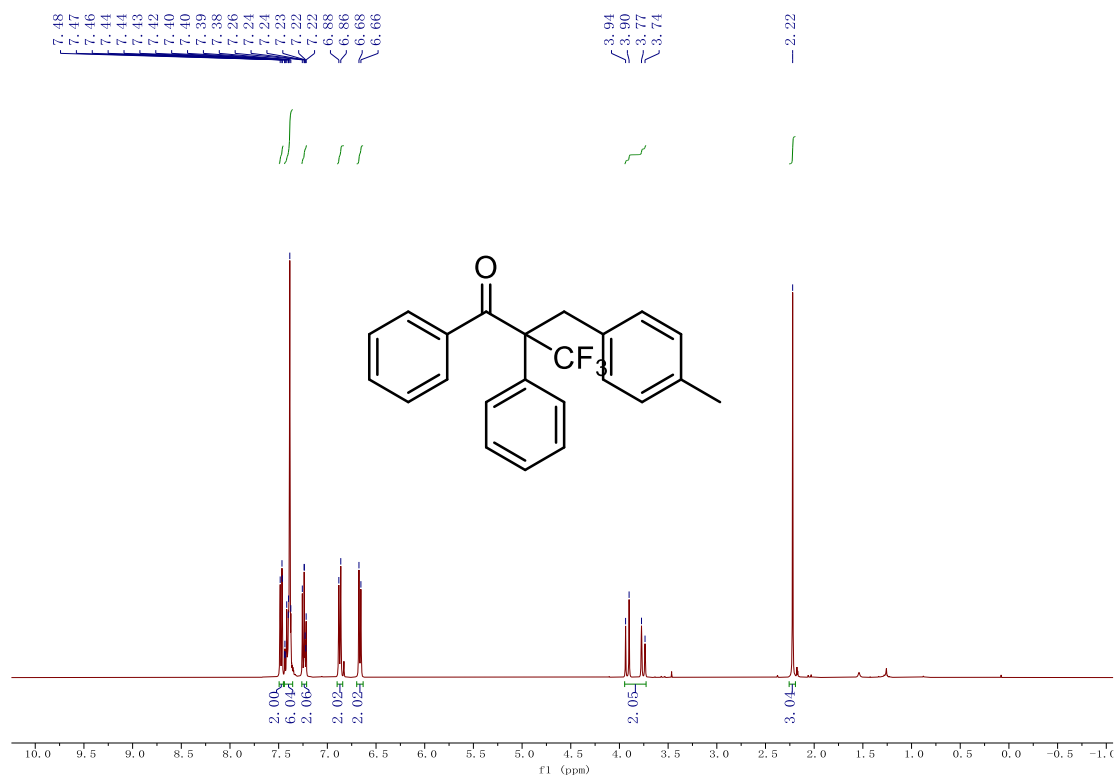

### $^{13}\text{C}\{^1\text{H}\}$ NMR-spectrum (101MHz, $\text{CDCl}_3$ ) of 4a

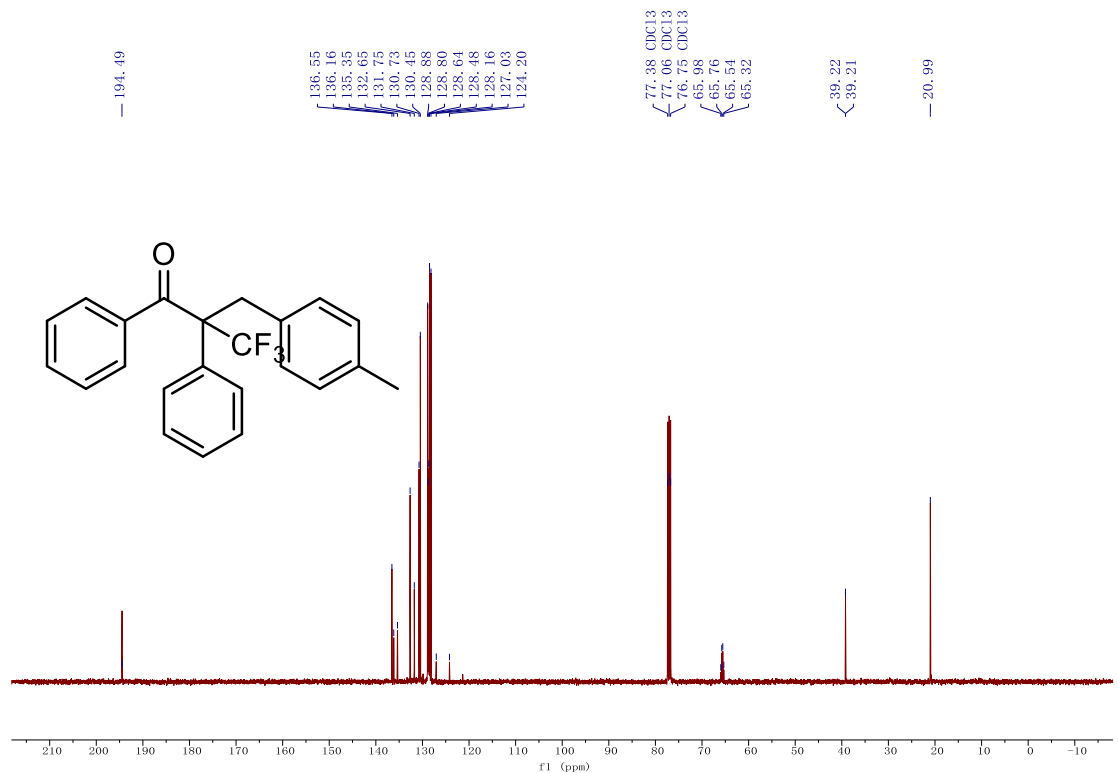

**<sup>19</sup>F NMR-spectrum (376 MHz, CDCl<sub>3</sub>) of 4a**

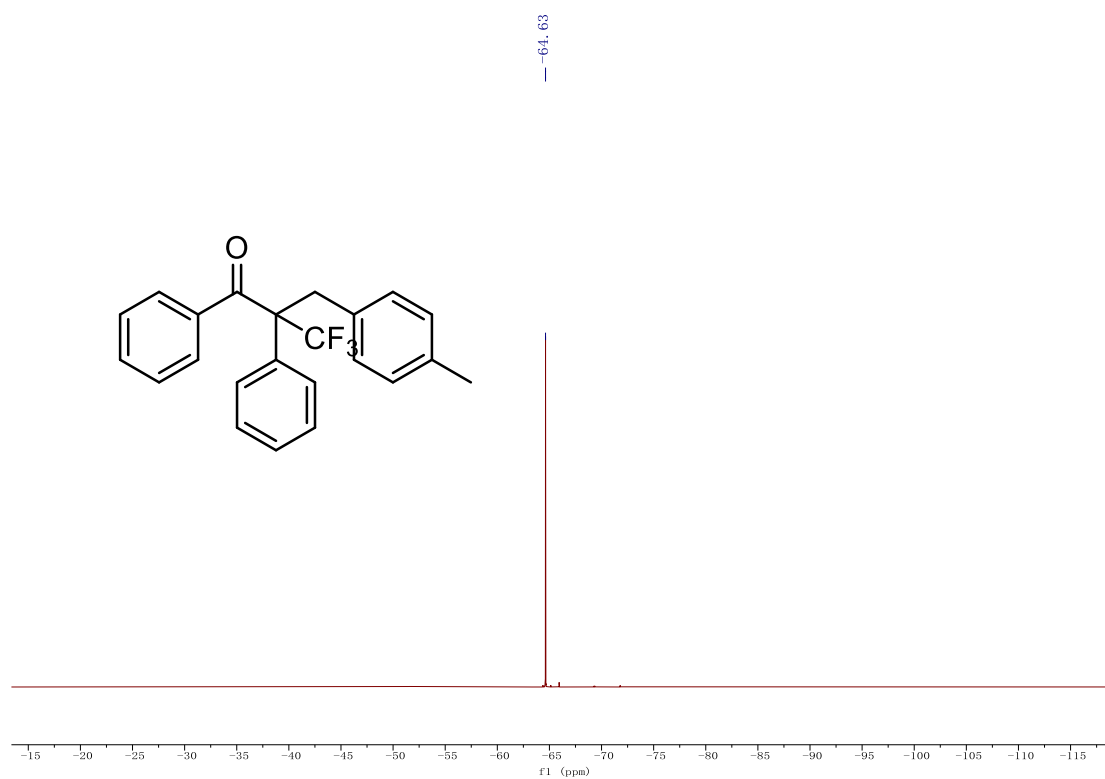

**<sup>1</sup>H NMR-spectrum (400MHz, CDCl<sub>3</sub>) of 4b**

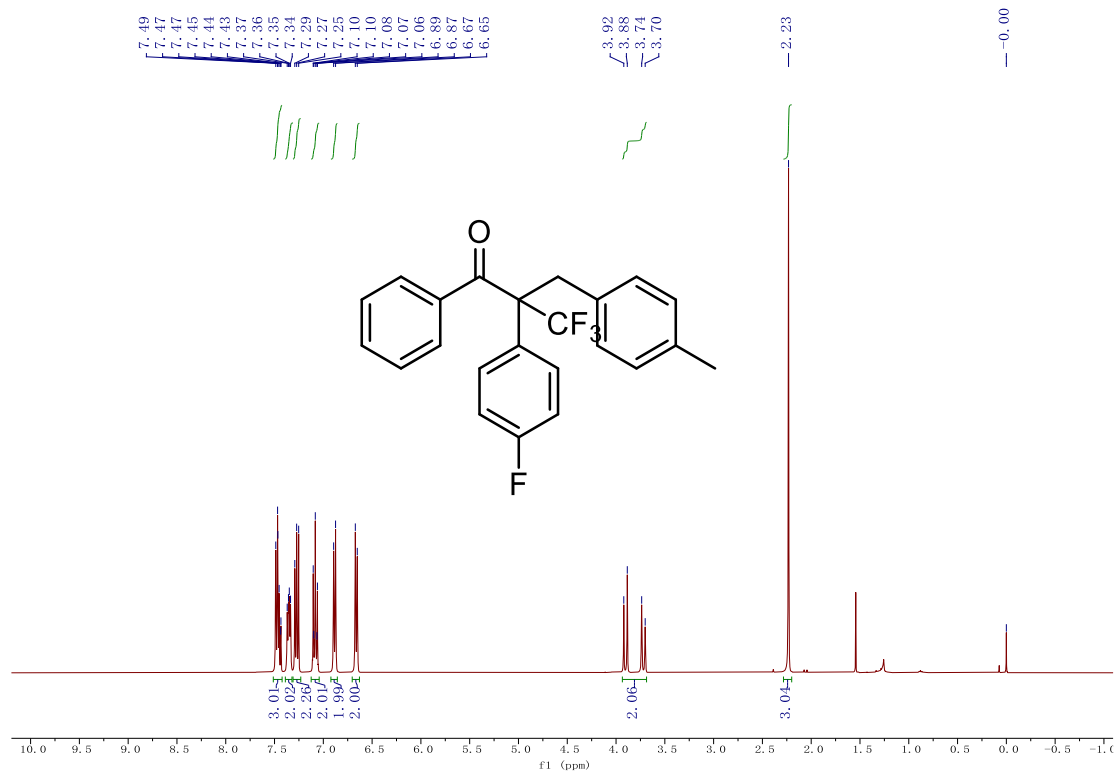

**$^{13}\text{C}\{^1\text{H}\}$  NMR-spectrum (101MHz,  $\text{CDCl}_3$ ) of 4b**

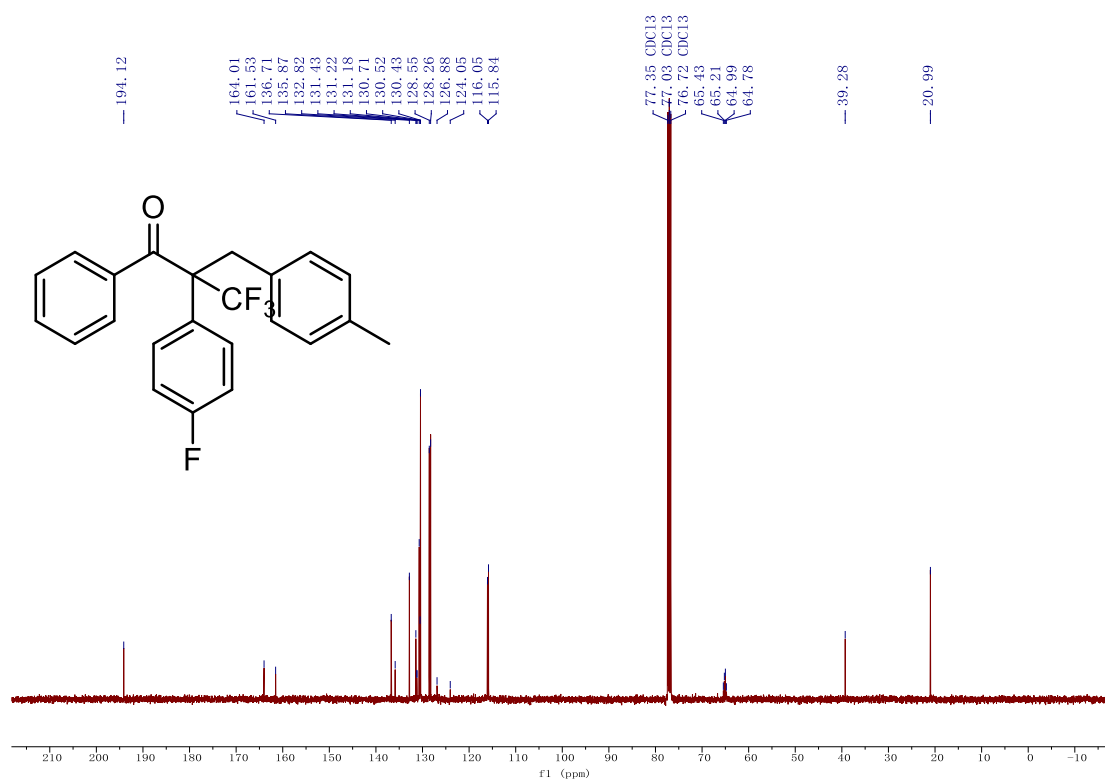

**$^{19}\text{F}$  NMR-spectrum (376 MHz,  $\text{CDCl}_3$ ) of 4b**

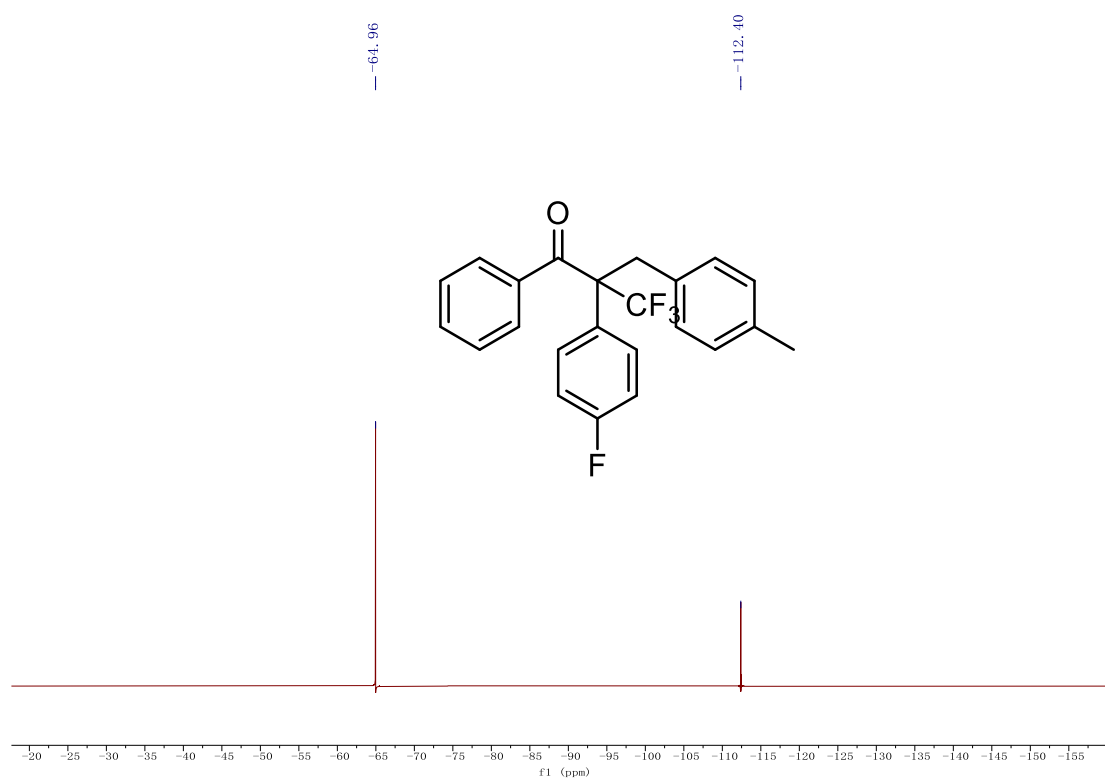

**<sup>1</sup>H NMR-spectrum (400MHz, CDCl<sub>3</sub>) of 4c**

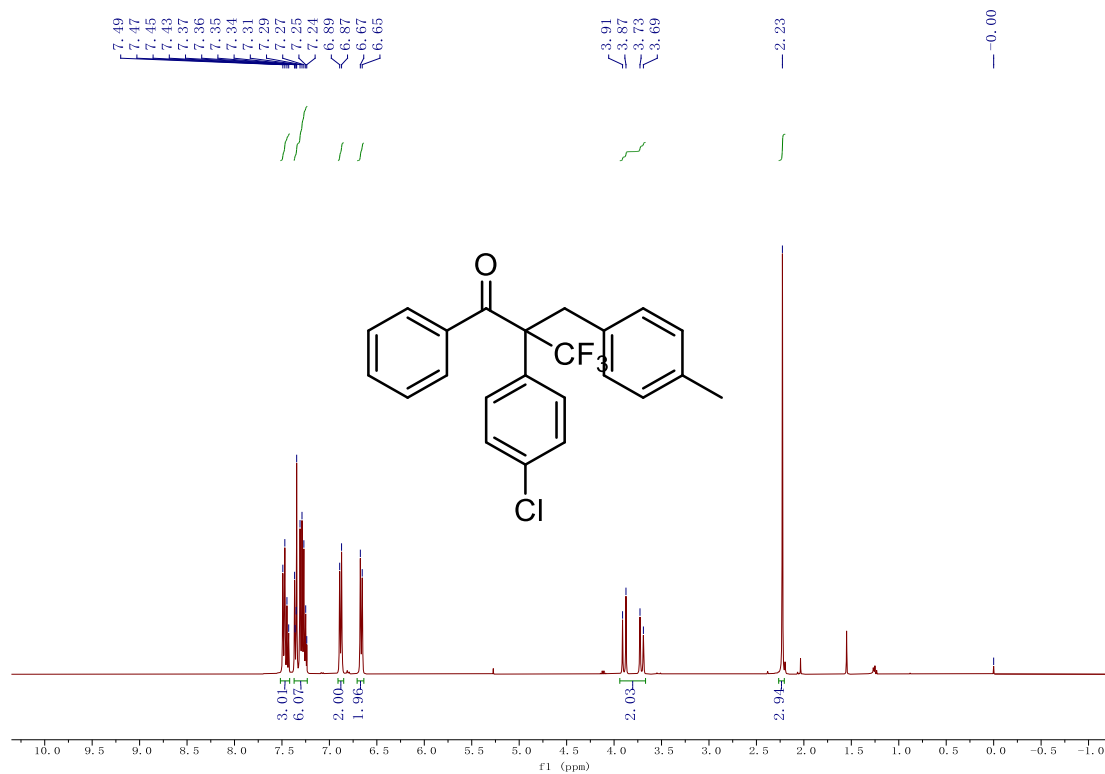

**<sup>13</sup>C{<sup>1</sup>H} NMR-spectrum (101MHz, CDCl<sub>3</sub>) of 4c**

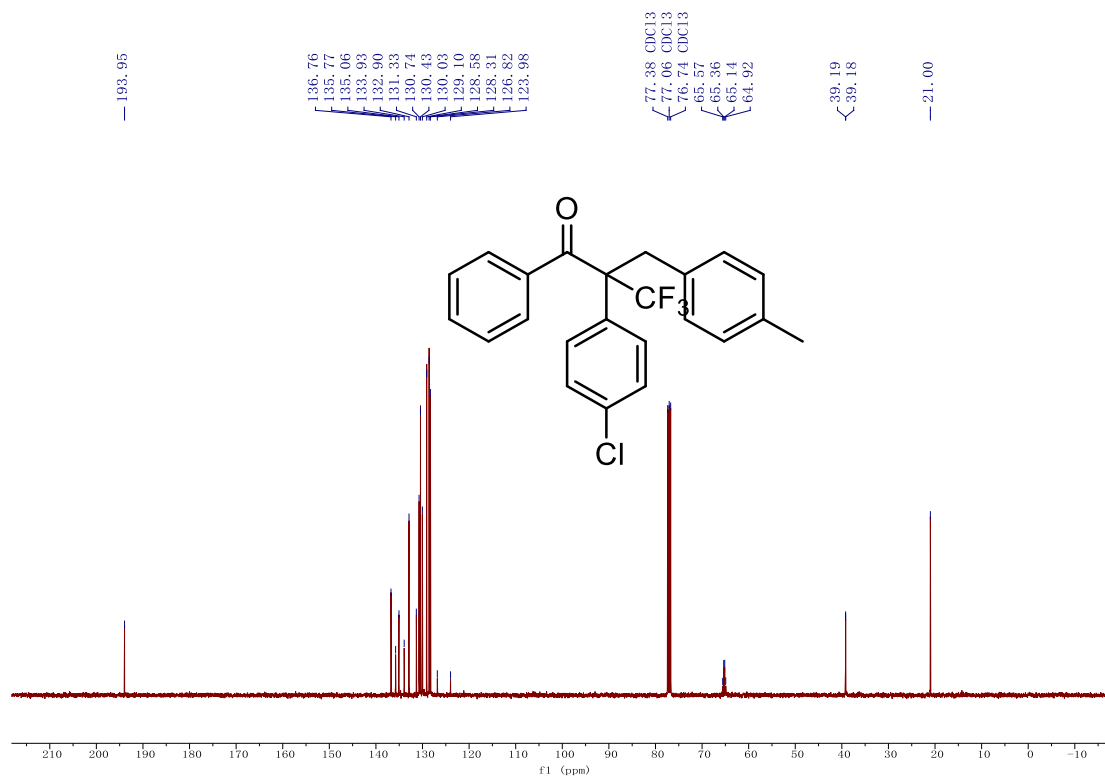

**<sup>19</sup>F NMR-spectrum (376 MHz, CDCl<sub>3</sub>) of 4c**

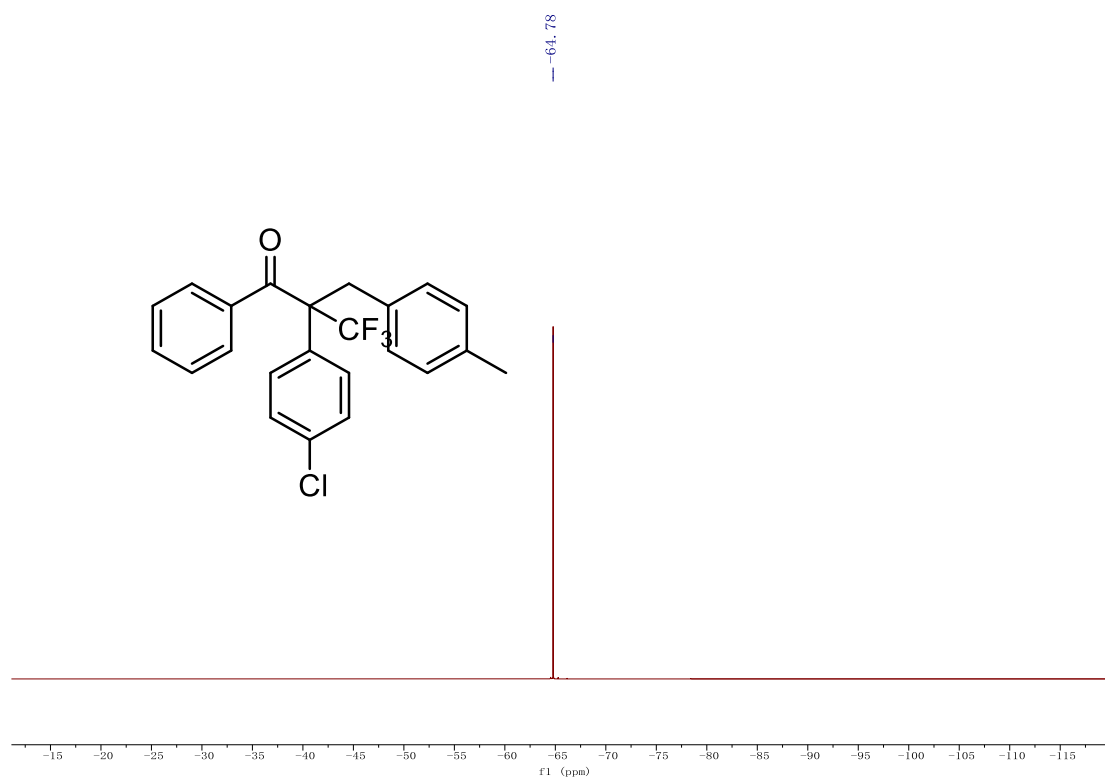

**<sup>1</sup>H NMR-spectrum (400MHz, CDCl<sub>3</sub>) of 4d**

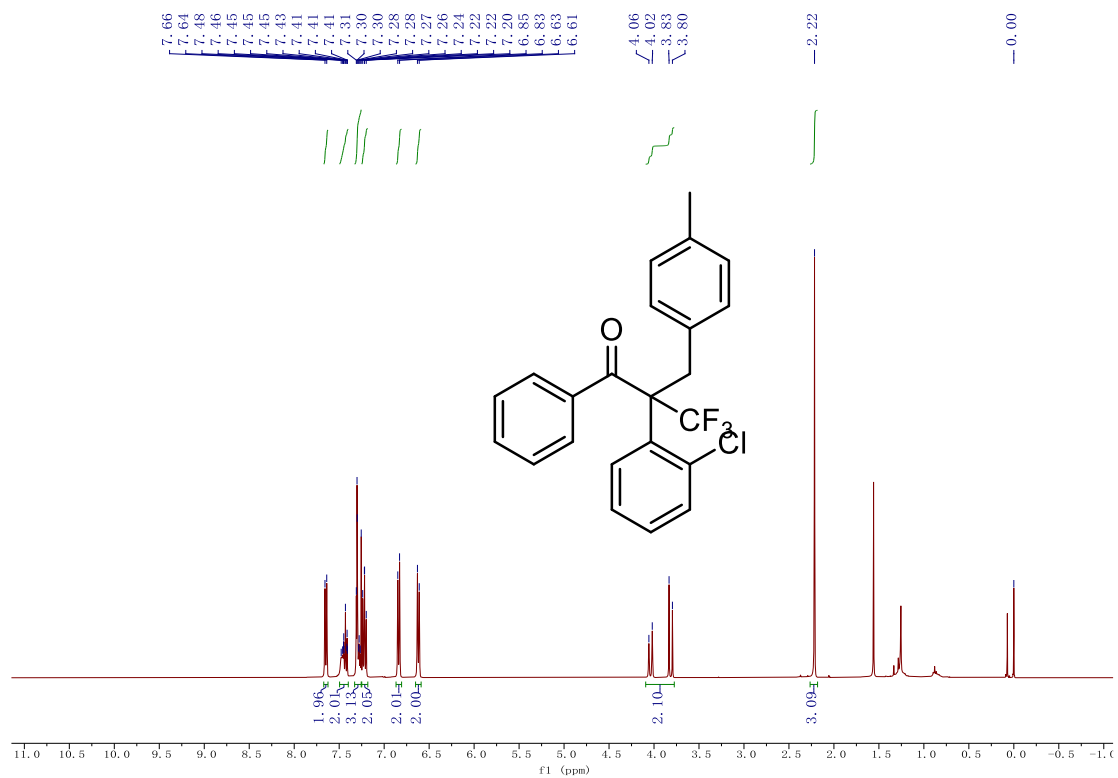

$^{13}\text{C}\{^1\text{H}\}$  NMR-spectrum (101MHz,  $\text{CDCl}_3$ ) of 4d

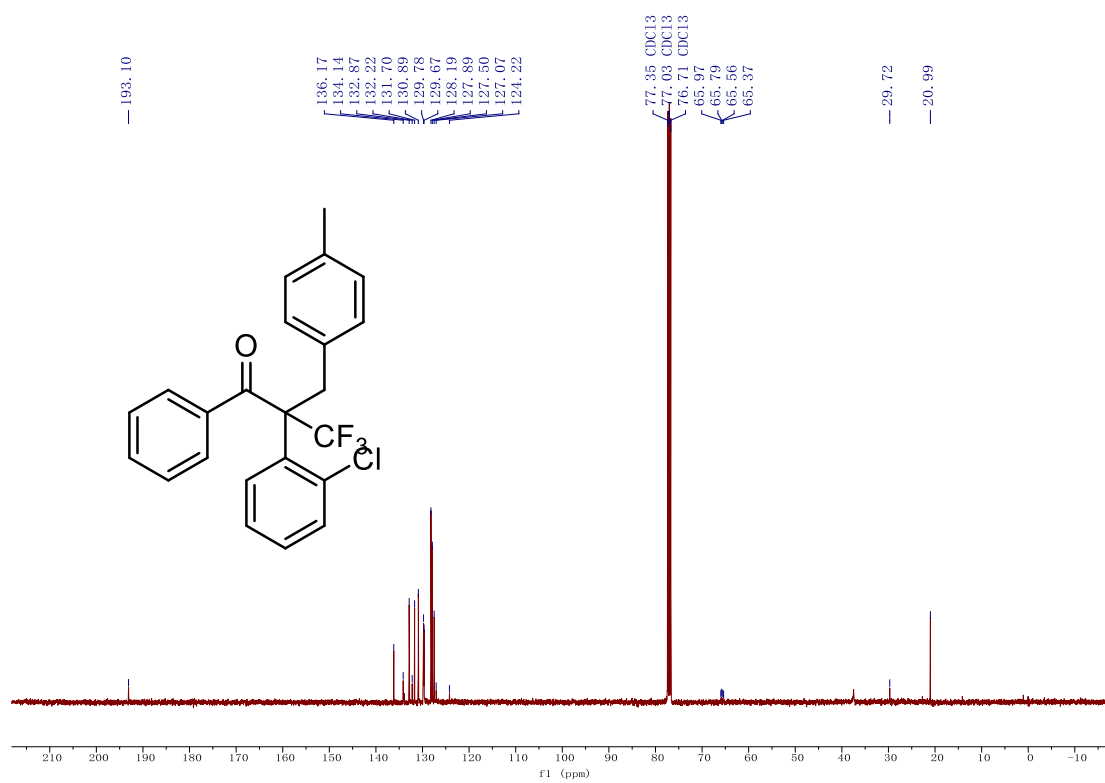

$^{19}\text{F}$  NMR-spectrum (376 MHz,  $\text{CDCl}_3$ ) of 4d

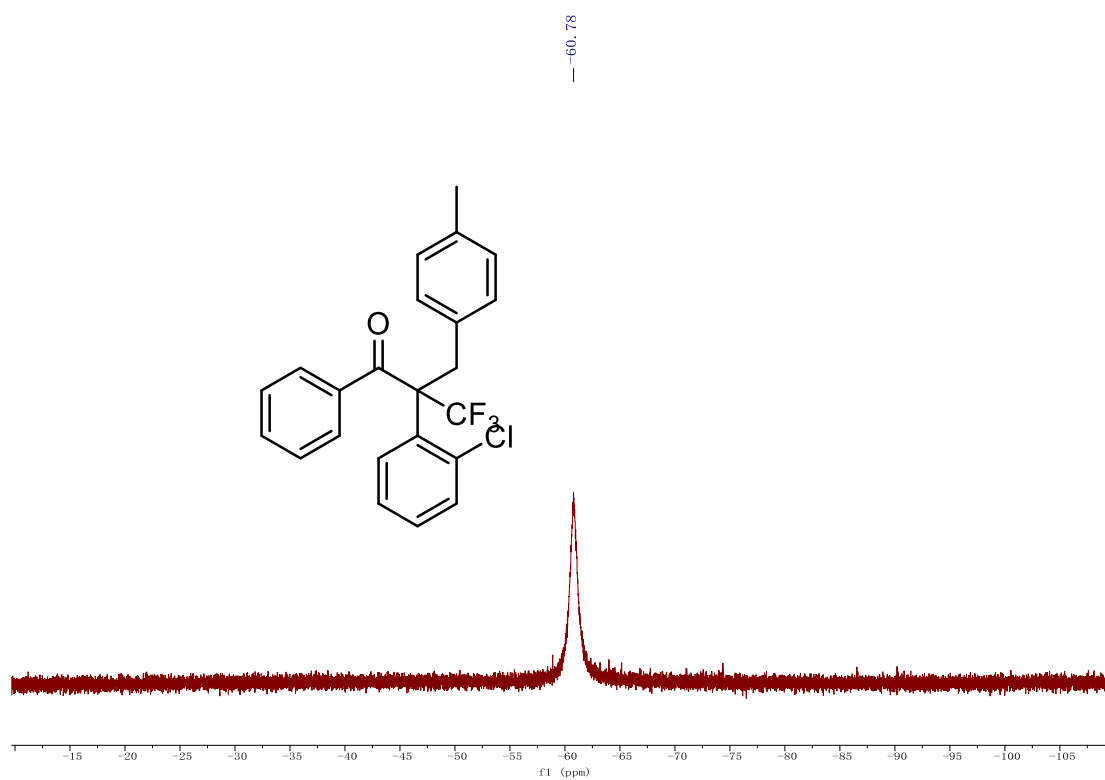

**<sup>1</sup>H NMR-spectrum (400MHz, CDCl<sub>3</sub>) of 4e**

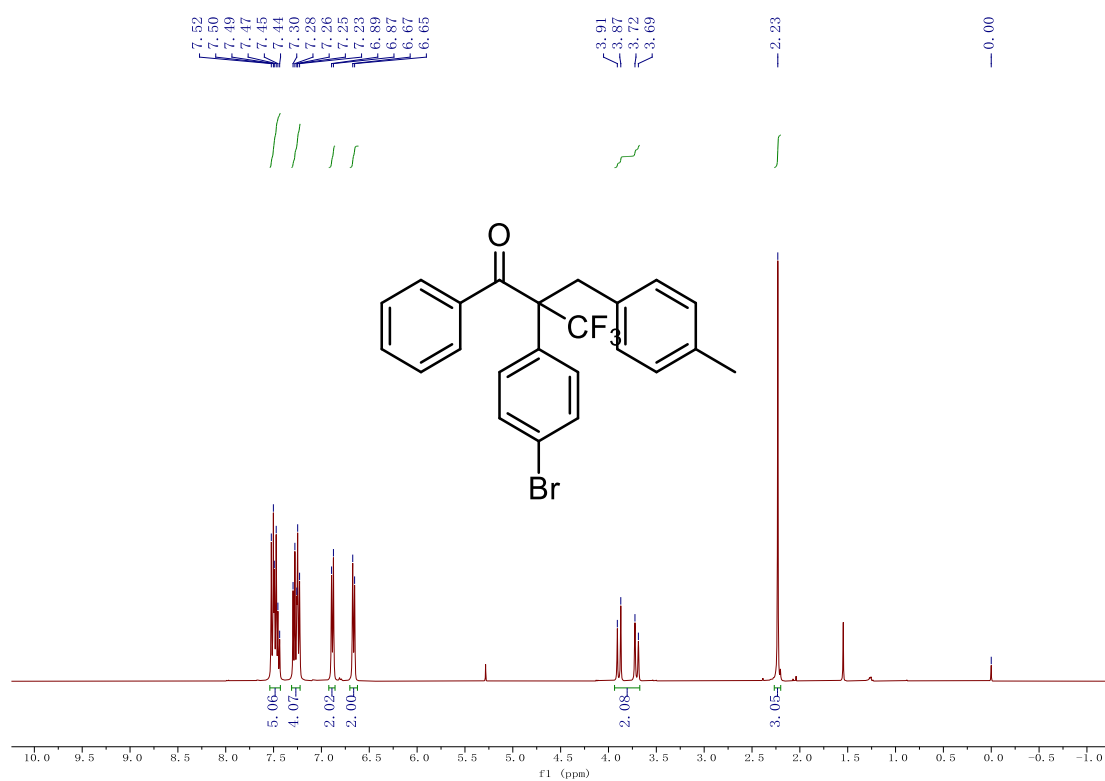

**<sup>13</sup>C{<sup>1</sup>H} NMR-spectrum (101MHz, CDCl<sub>3</sub>) of 4e**

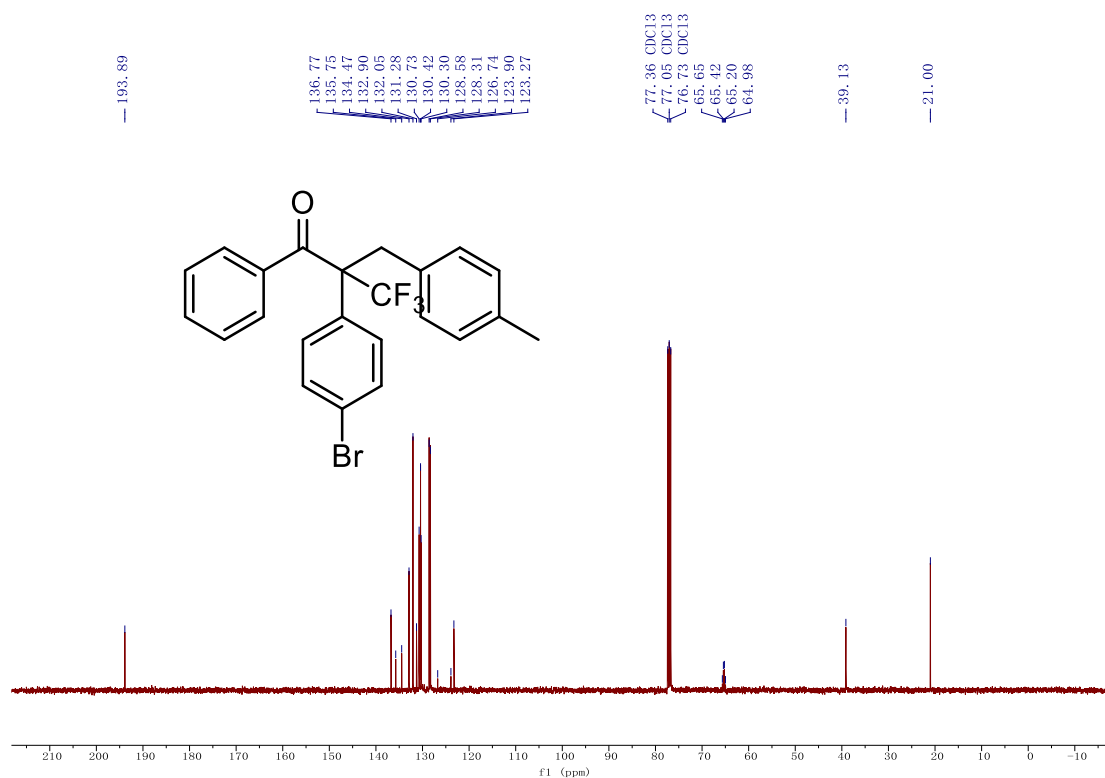

**<sup>19</sup>F NMR-spectrum (376 MHz, CDCl<sub>3</sub>) of 4e**

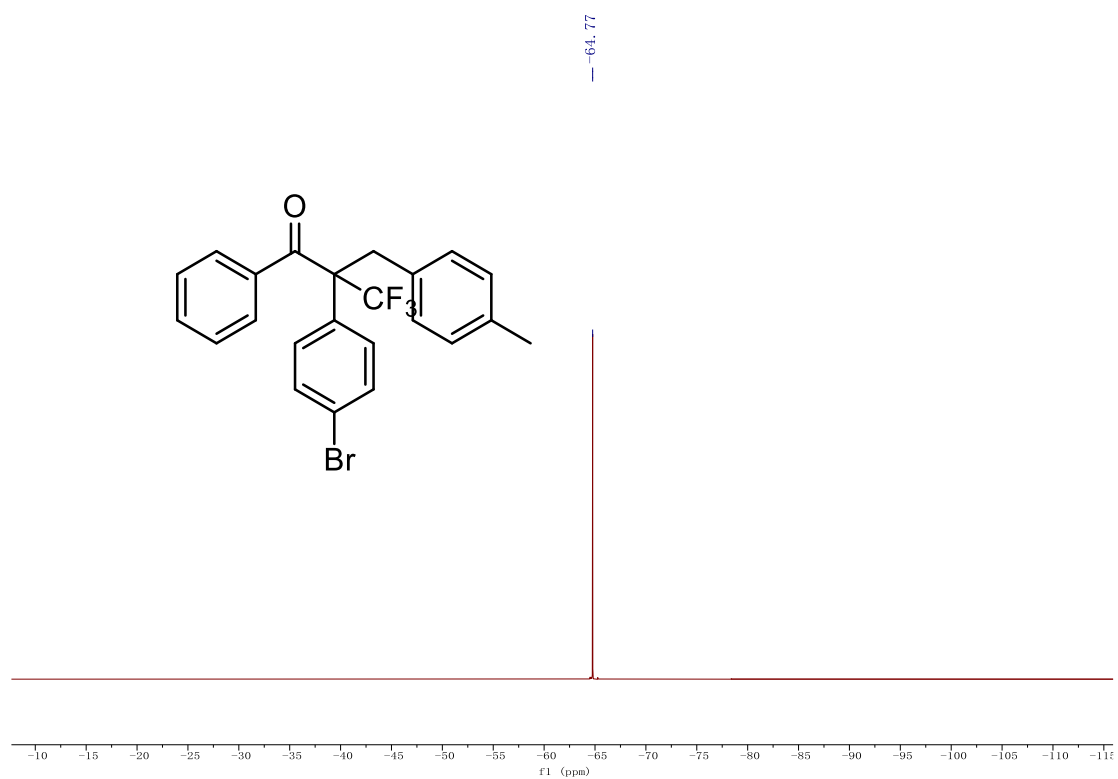

**<sup>1</sup>H NMR-spectrum (400MHz, CDCl<sub>3</sub>) of 4f**

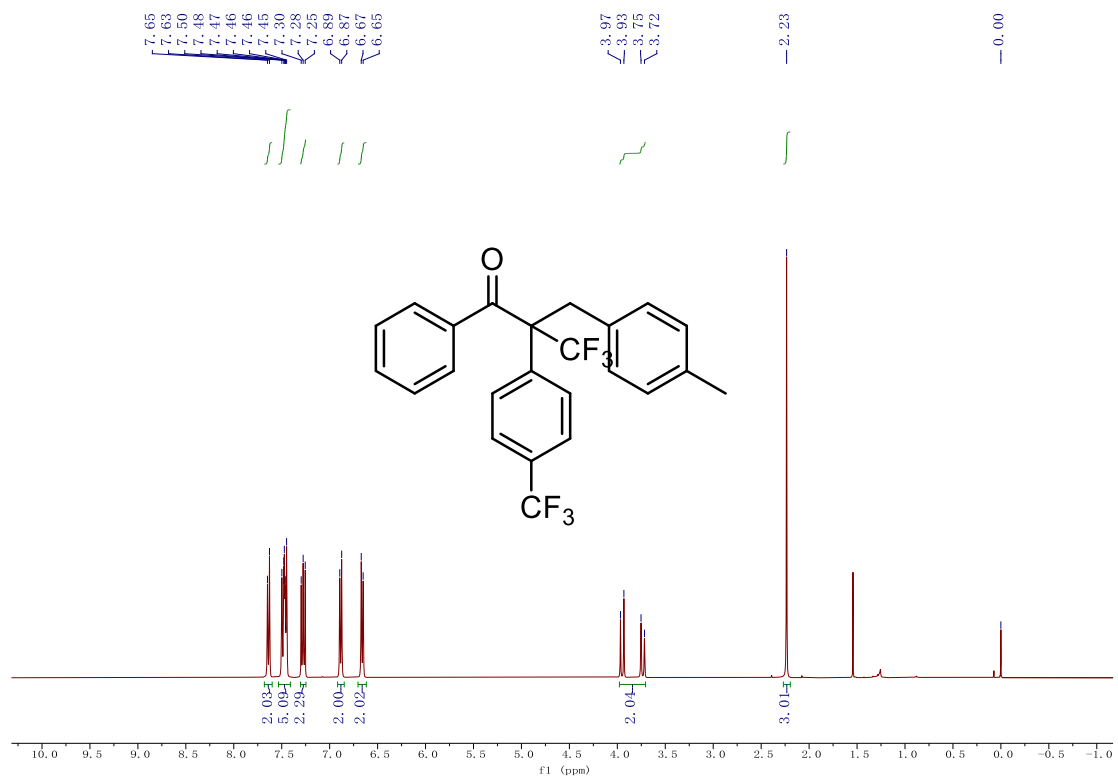

**$^{13}\text{C}\{^1\text{H}\}$  NMR-spectrum (101MHz,  $\text{CDCl}_3$ ) of 4f**

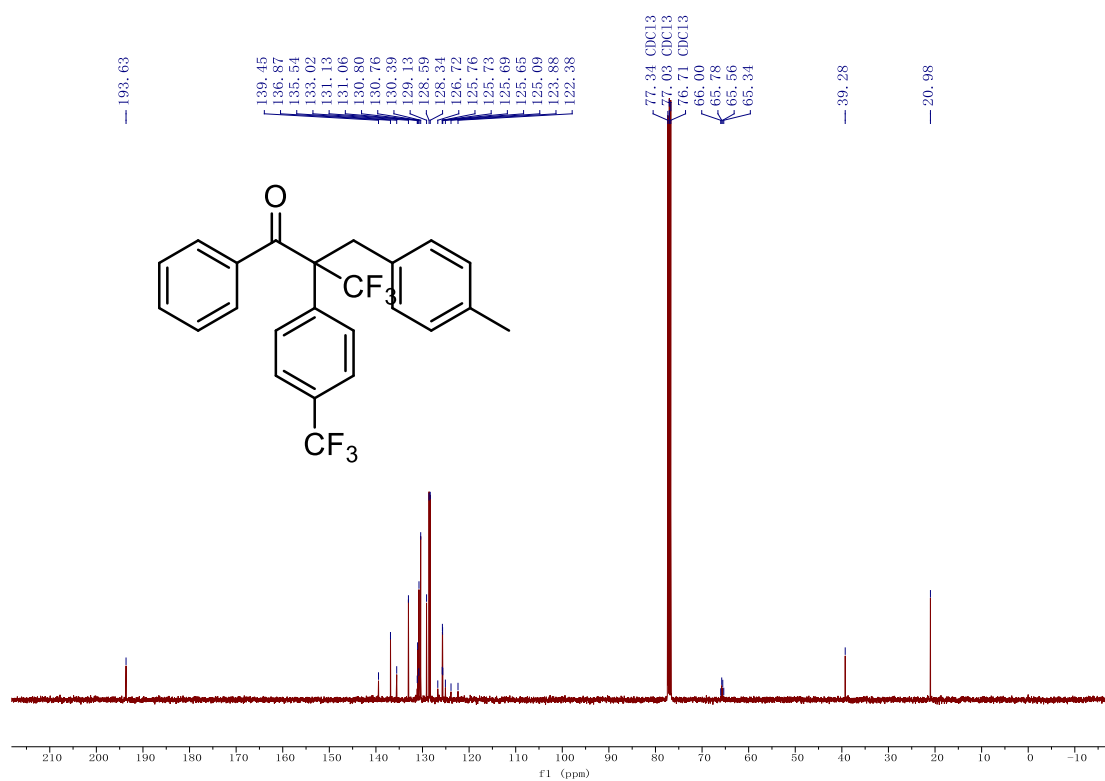

**$^{19}\text{F}$  NMR-spectrum (376 MHz,  $\text{CDCl}_3$ ) of 4f**

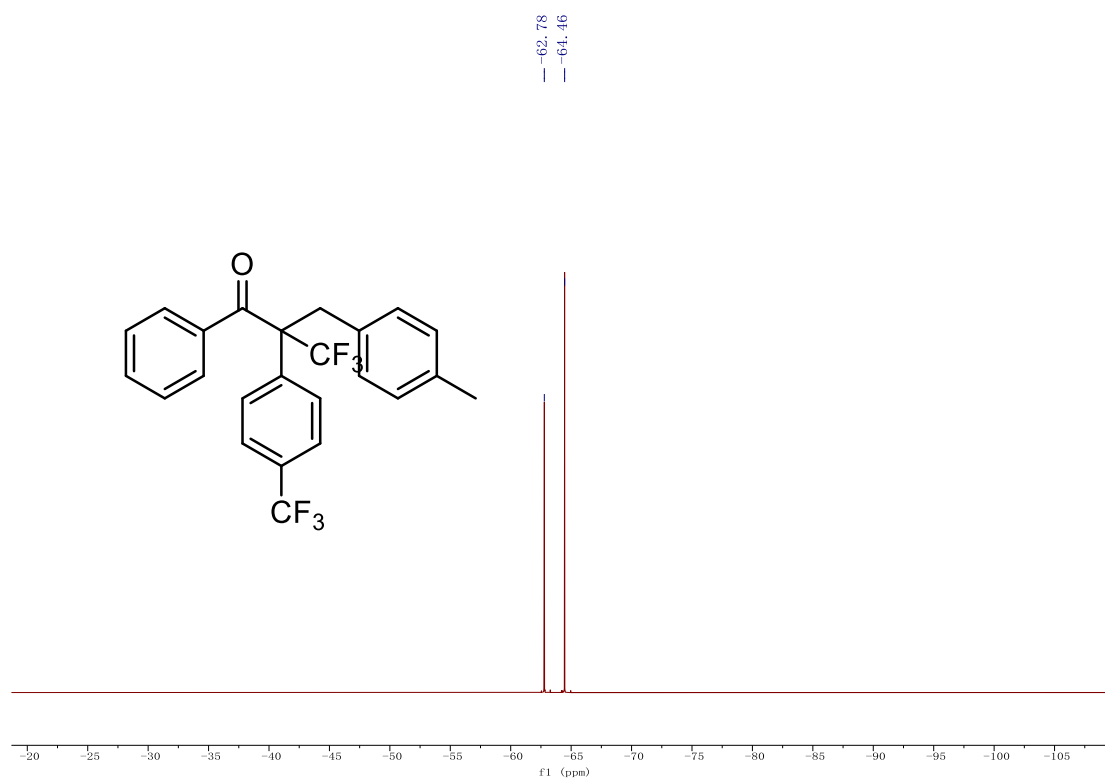

**<sup>1</sup>H NMR-spectrum (400MHz, CDCl<sub>3</sub>) of 4g**

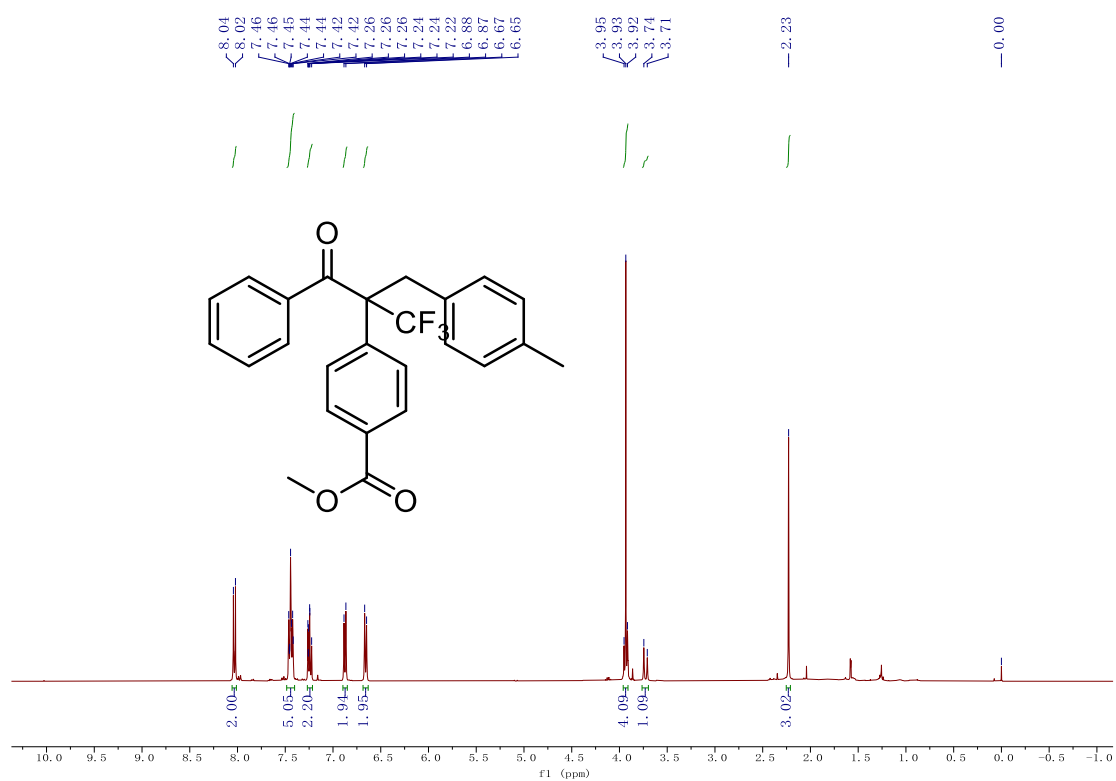

**<sup>13</sup>C{<sup>1</sup>H} NMR-spectrum (101MHz, CDCl<sub>3</sub>) of 4g**

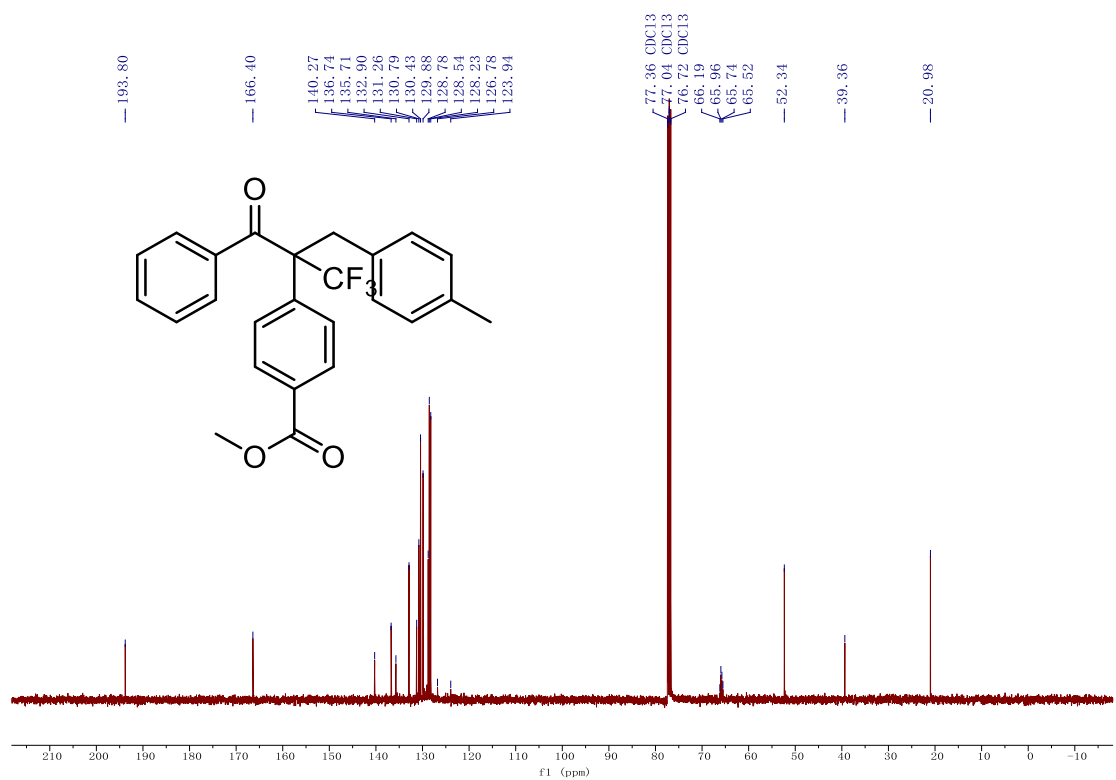

**<sup>19</sup>F NMR-spectrum (376 MHz, CDCl<sub>3</sub>) of 4g**

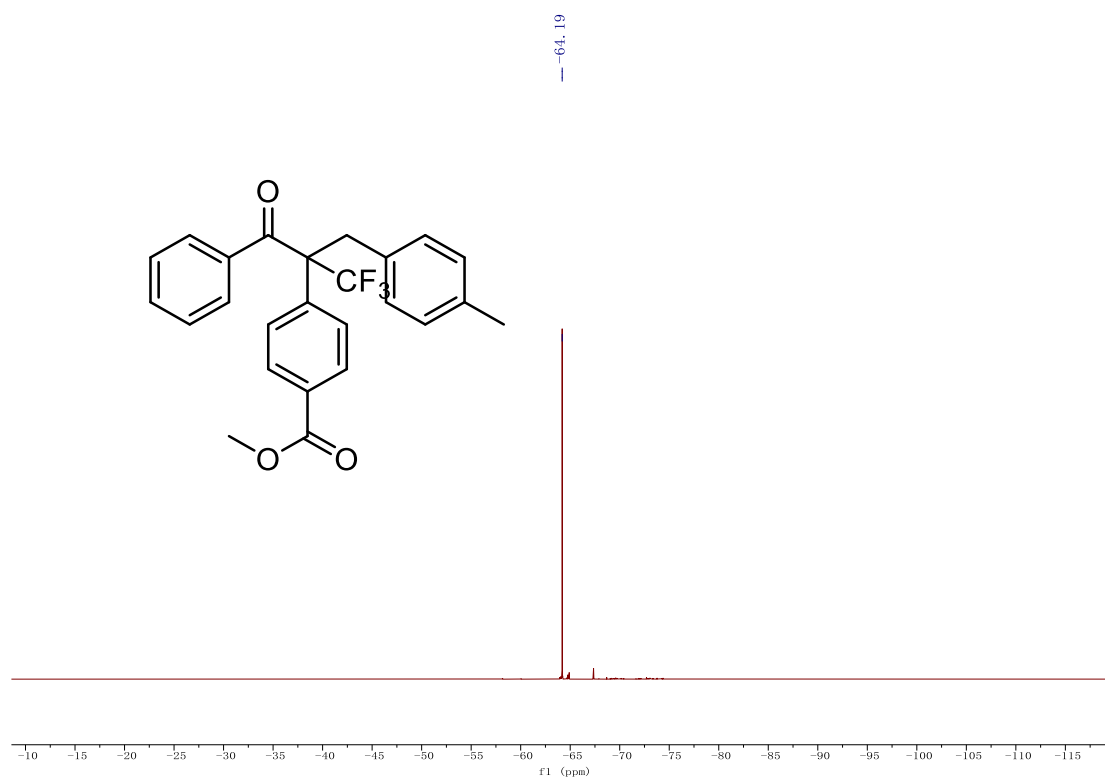

**<sup>1</sup>H NMR-spectrum (400MHz, CDCl<sub>3</sub>) of 4h**

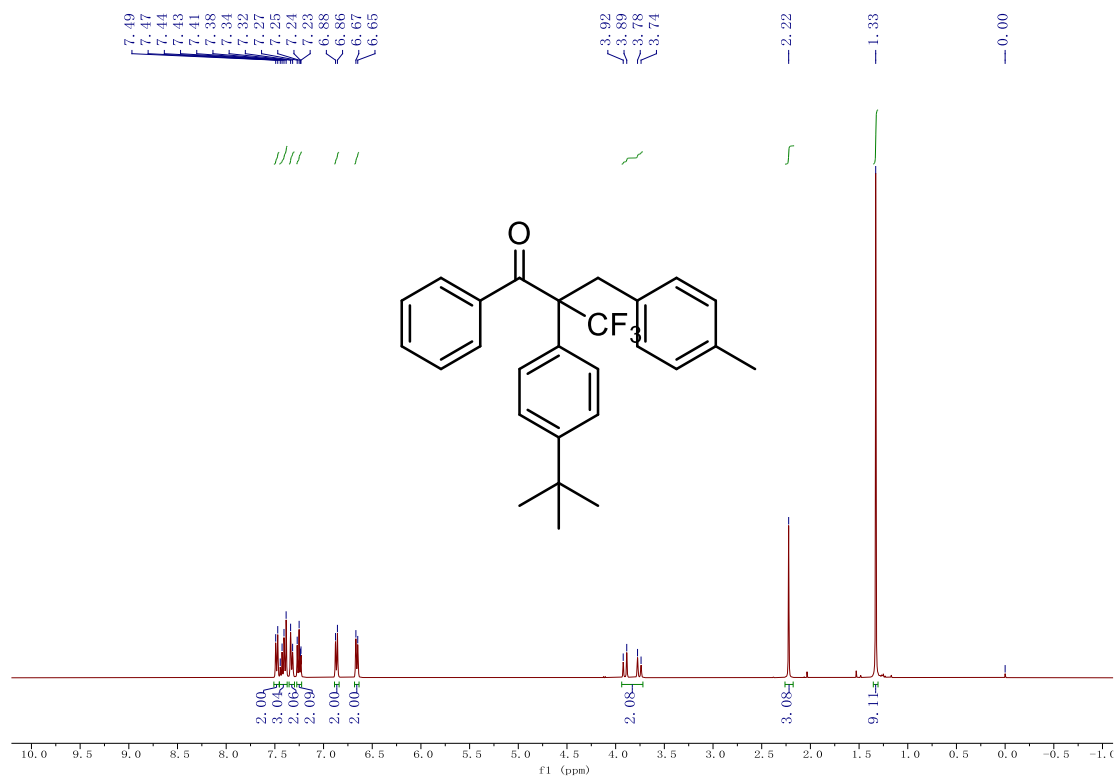

**$^{13}\text{C}\{^1\text{H}\}$  NMR-spectrum (101MHz,  $\text{CDCl}_3$ ) of 4h**

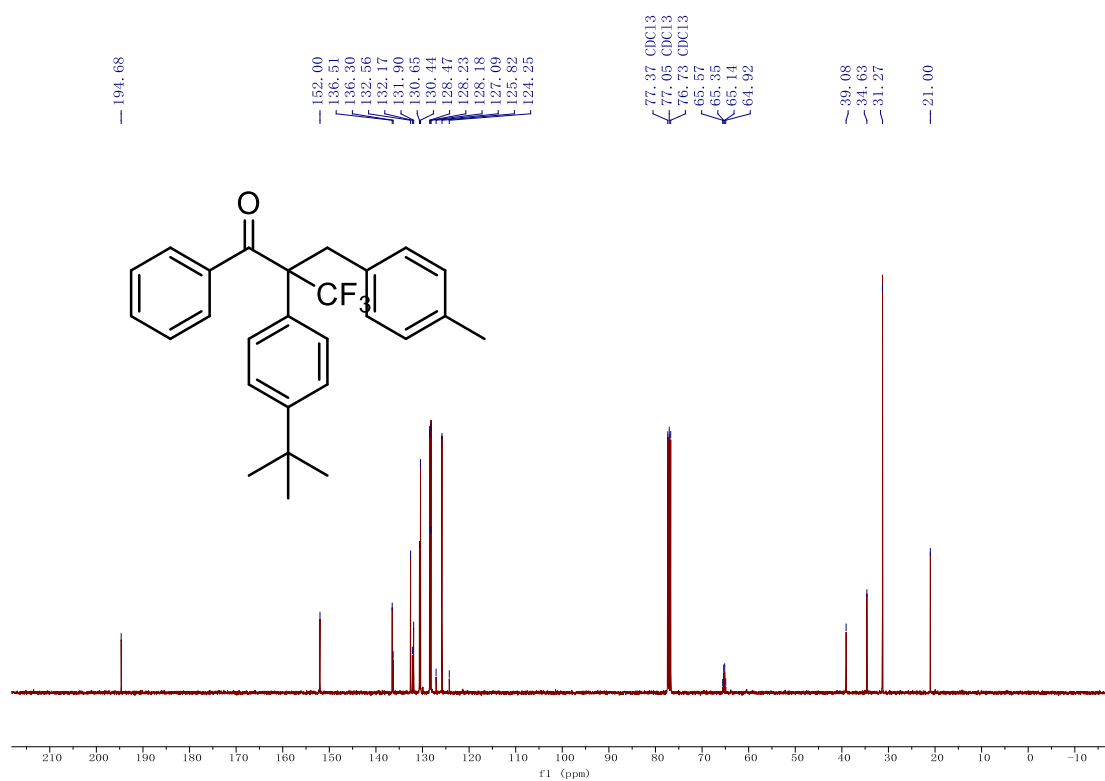

**$^{19}\text{F}$  NMR-spectrum (376 MHz,  $\text{CDCl}_3$ ) of 4h**

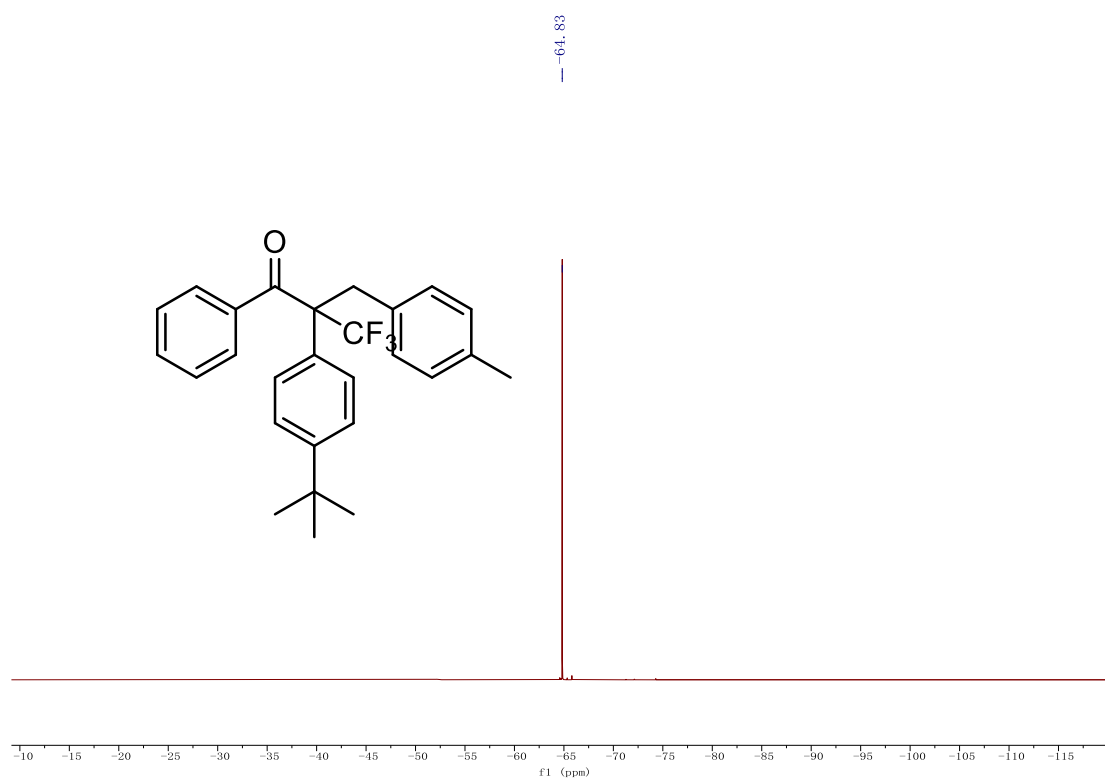

**<sup>1</sup>H NMR-spectrum (400MHz, CDCl<sub>3</sub>) of 4i**

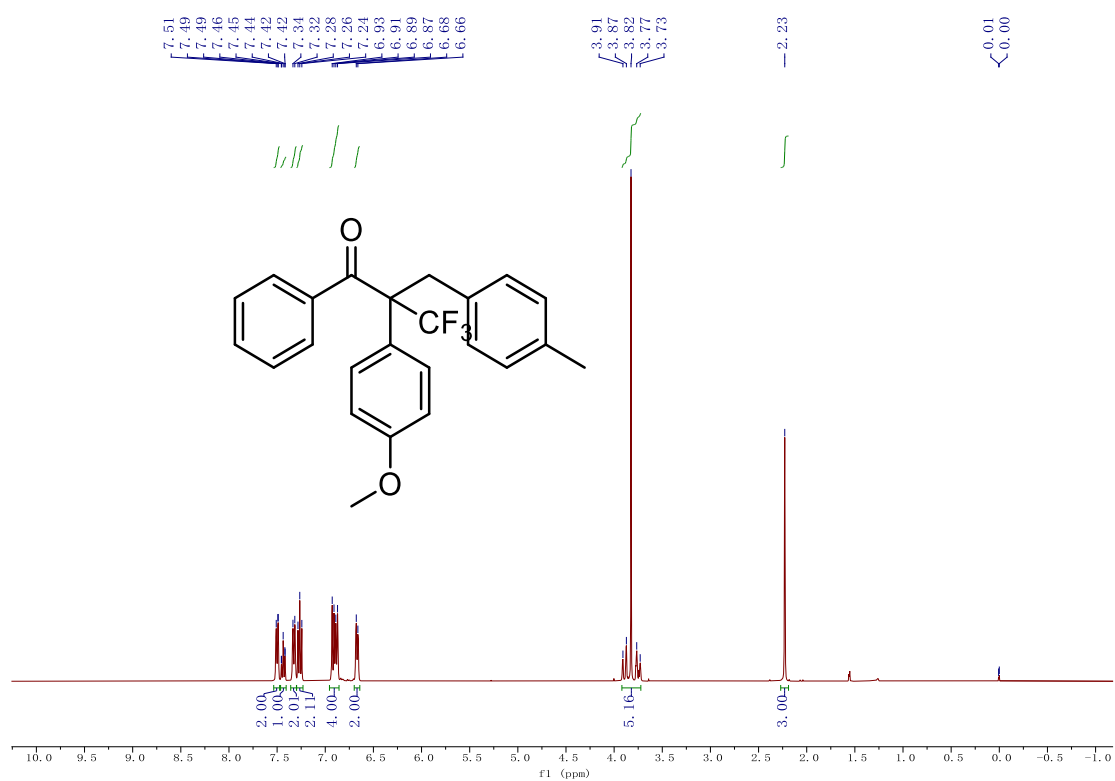

**<sup>13</sup>C{<sup>1</sup>H} NMR-spectrum (101MHz, CDCl<sub>3</sub>) of 4i**

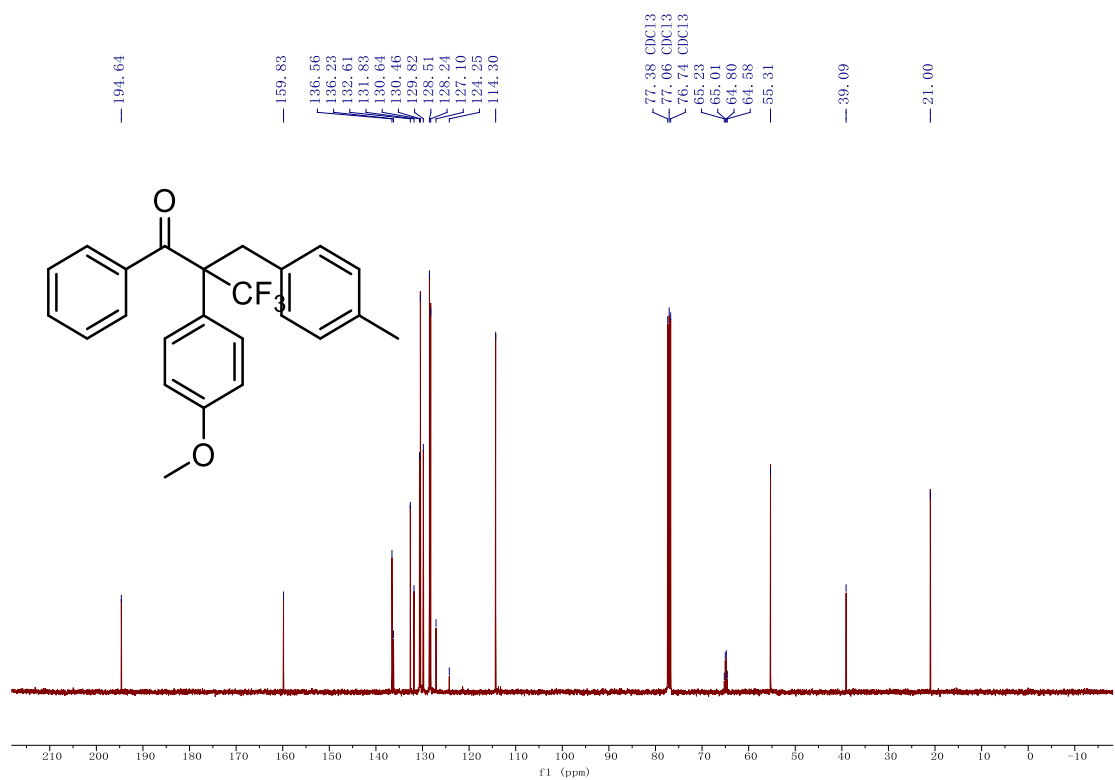

**<sup>19</sup>F NMR-spectrum (376 MHz, CDCl<sub>3</sub>) of 4i**

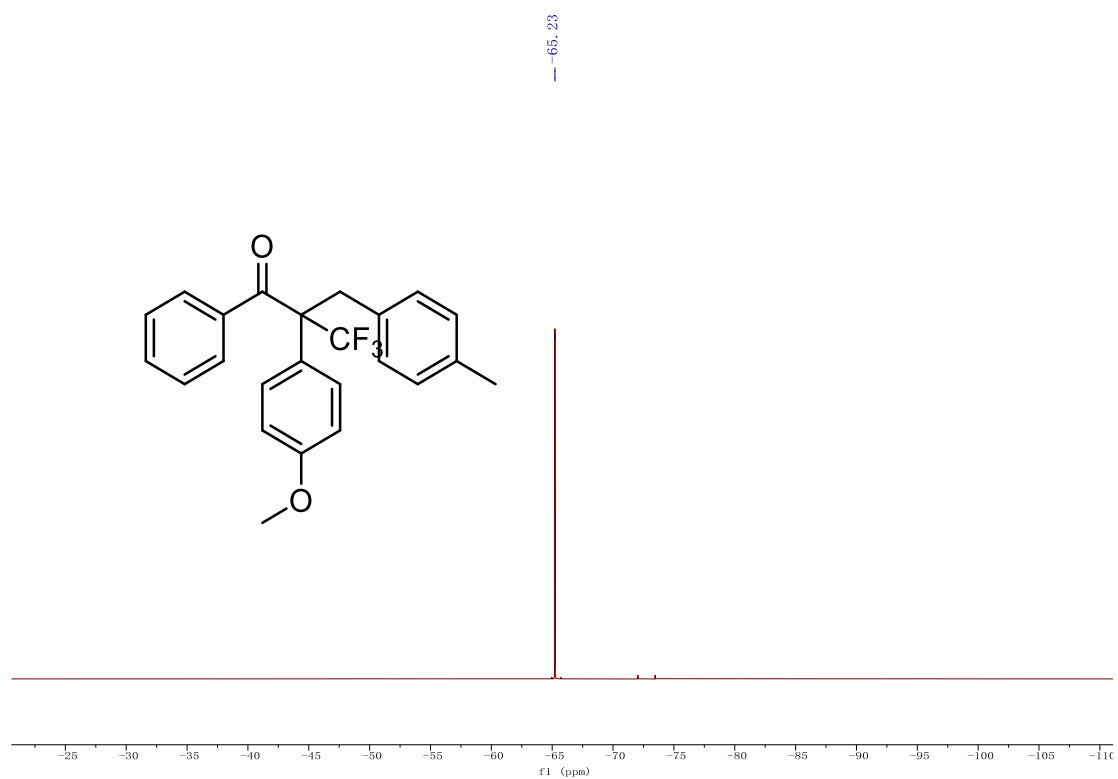

**<sup>1</sup>H NMR-spectrum (400MHz, CDCl<sub>3</sub>) of 4j**

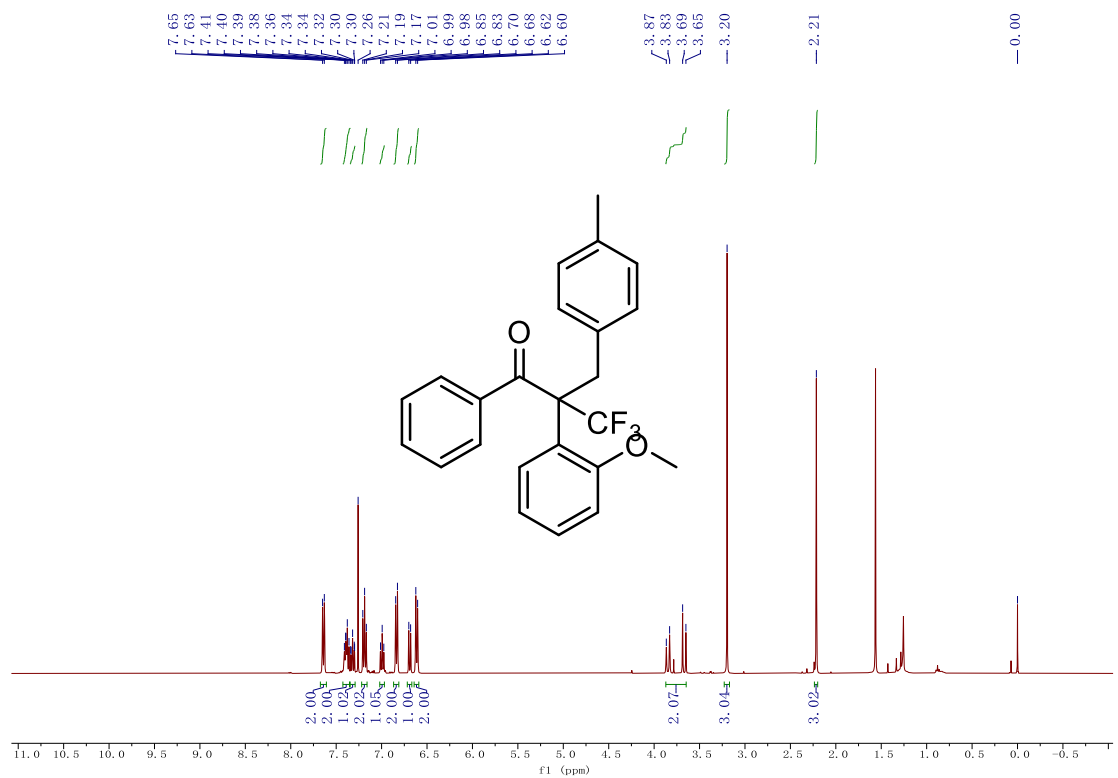

$^{13}\text{C}\{^1\text{H}\}$  NMR-spectrum (101MHz,  $\text{CDCl}_3$ ) of 4j

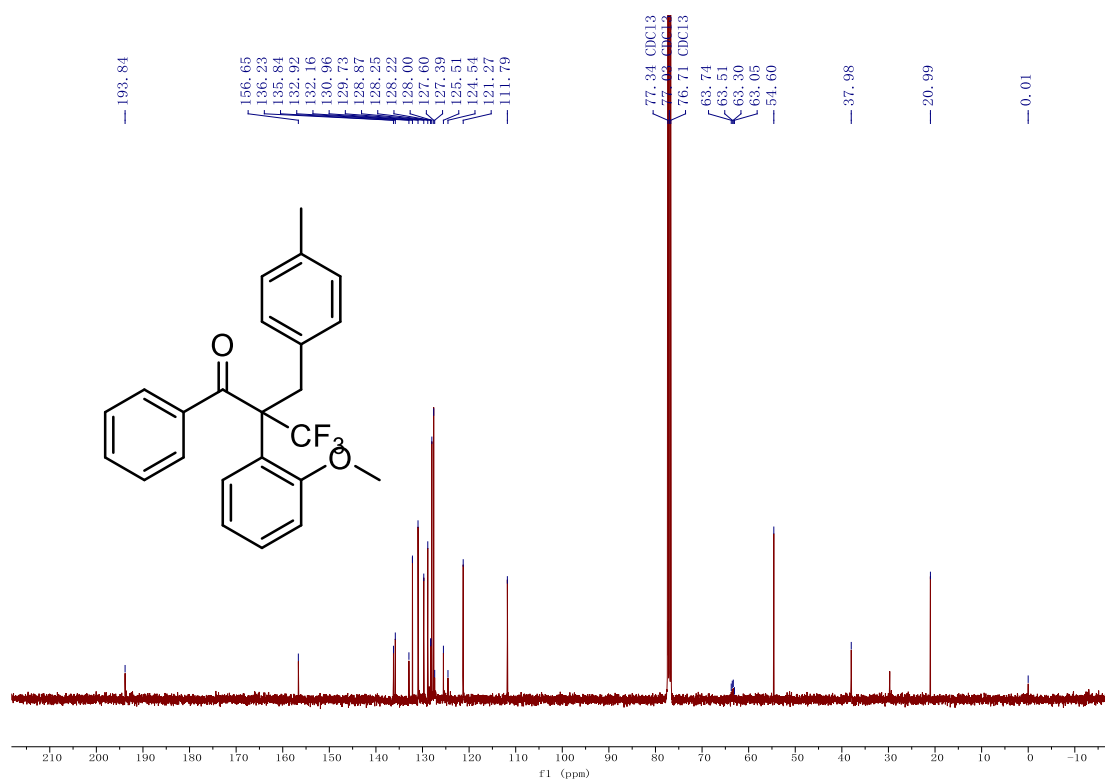

$^{19}\text{F}$  NMR-spectrum (376 MHz,  $\text{CDCl}_3$ ) of 4j

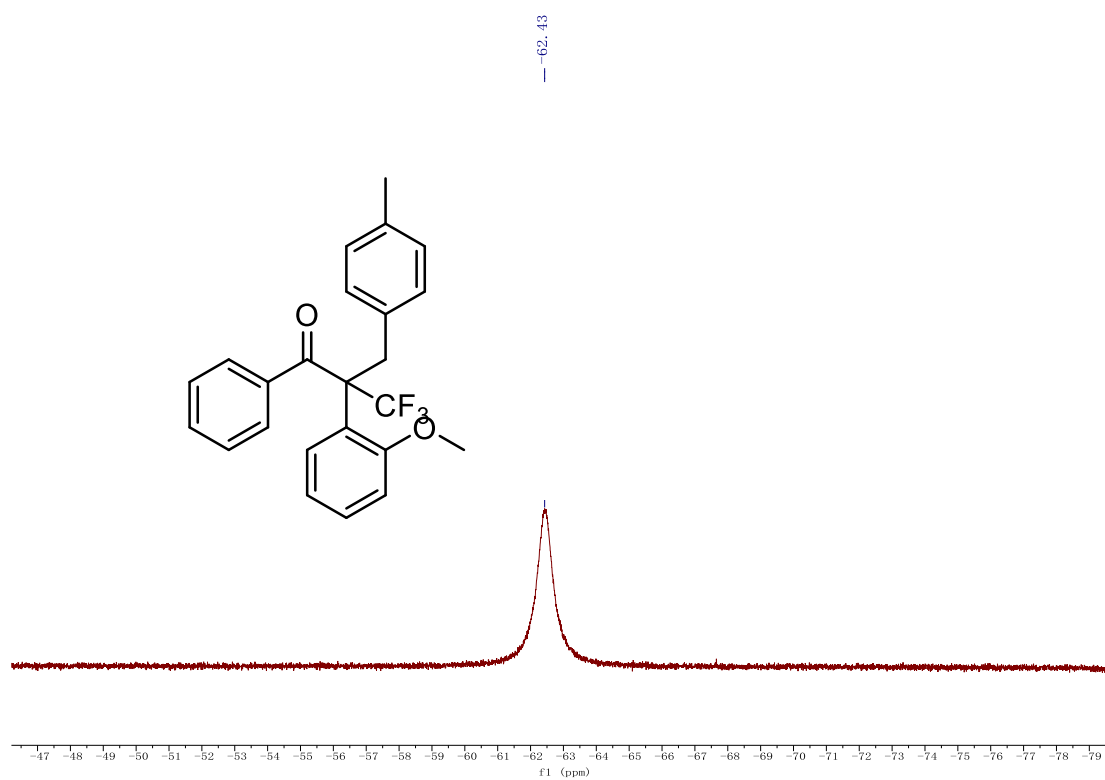

$^1\text{H}$  NMR-spectrum (400MHz,  $\text{CDCl}_3$ ) of 4k

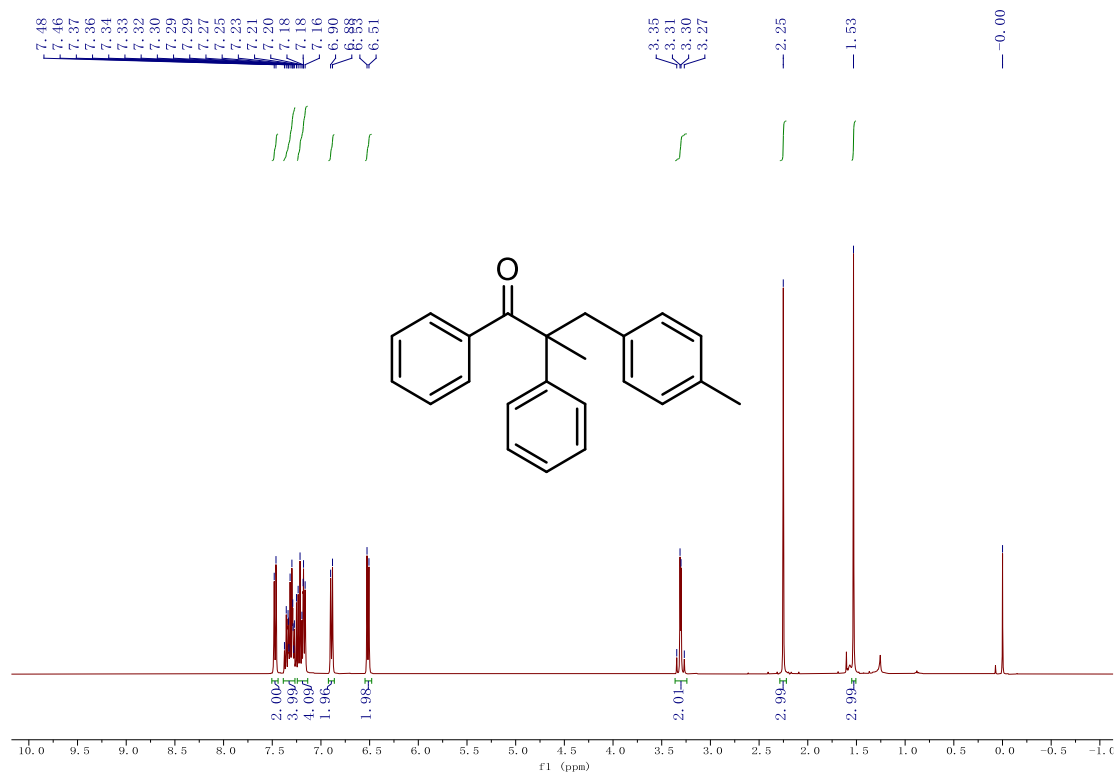

$^{13}\text{C}\{^1\text{H}\}$  NMR -spectrum (101MHz,  $\text{CDCl}_3$ ) of 4k

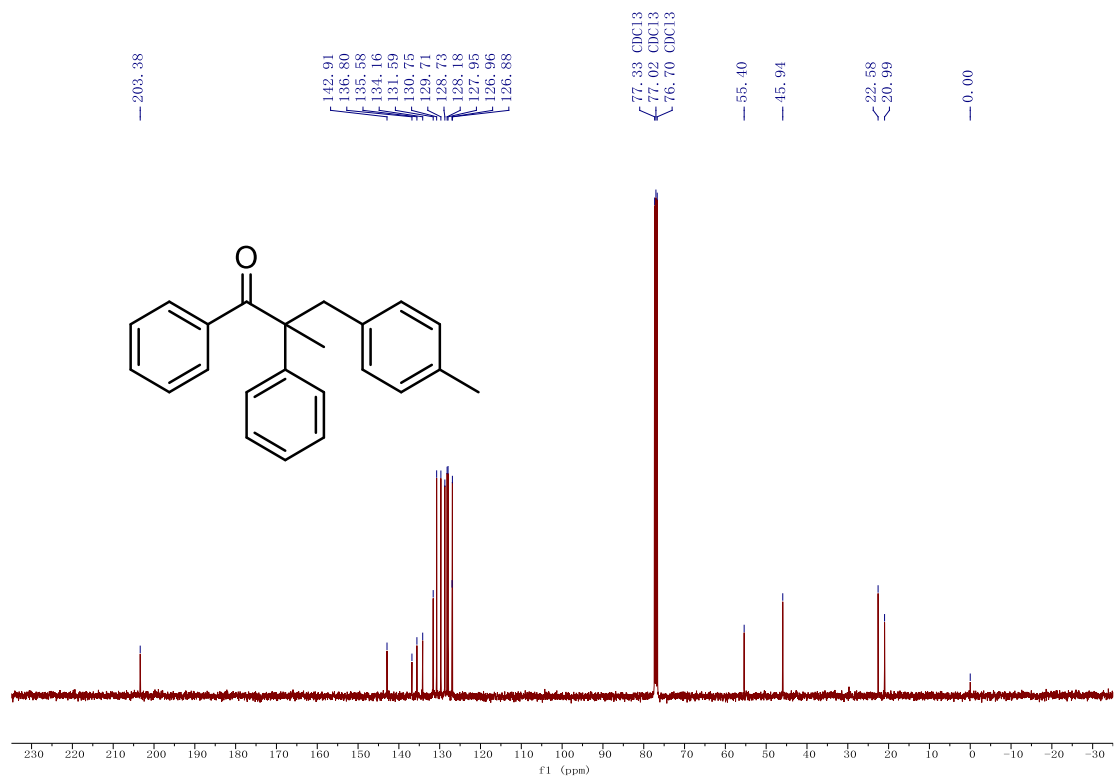

<sup>1</sup>H NMR-spectrum (400MHz, CDCl<sub>3</sub>) of 41

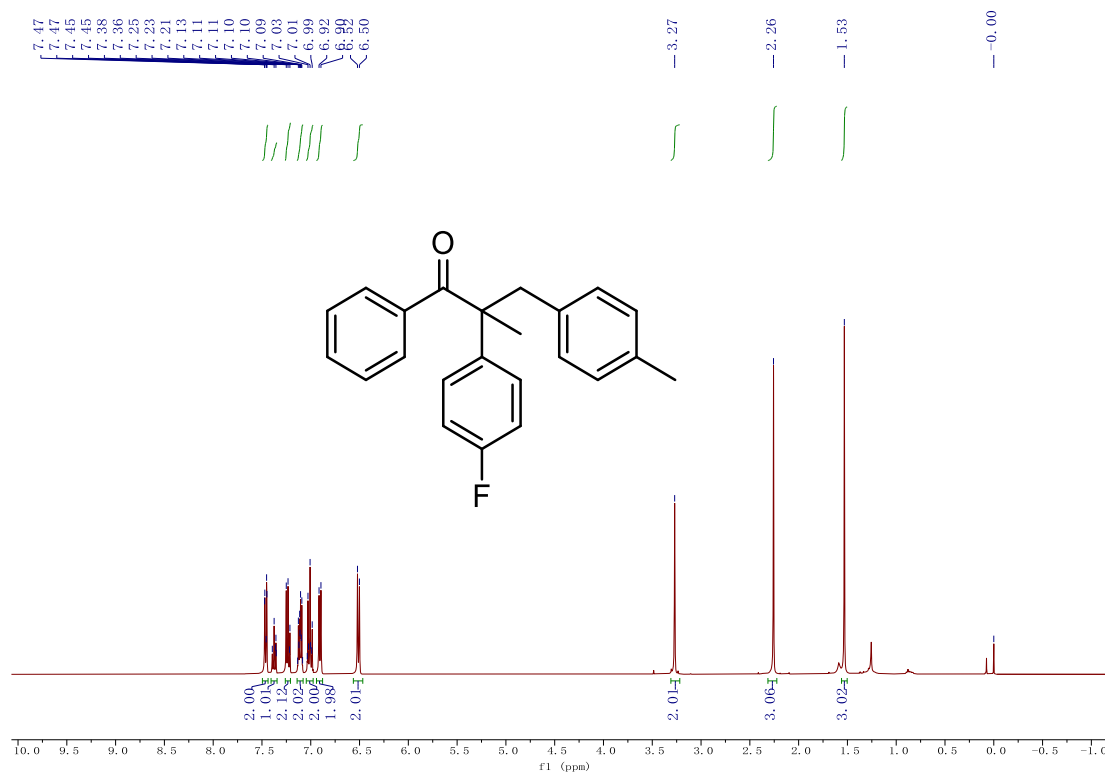

<sup>13</sup>C{<sup>1</sup>H} NMR-spectrum (101MHz, CDCl<sub>3</sub>) of 41

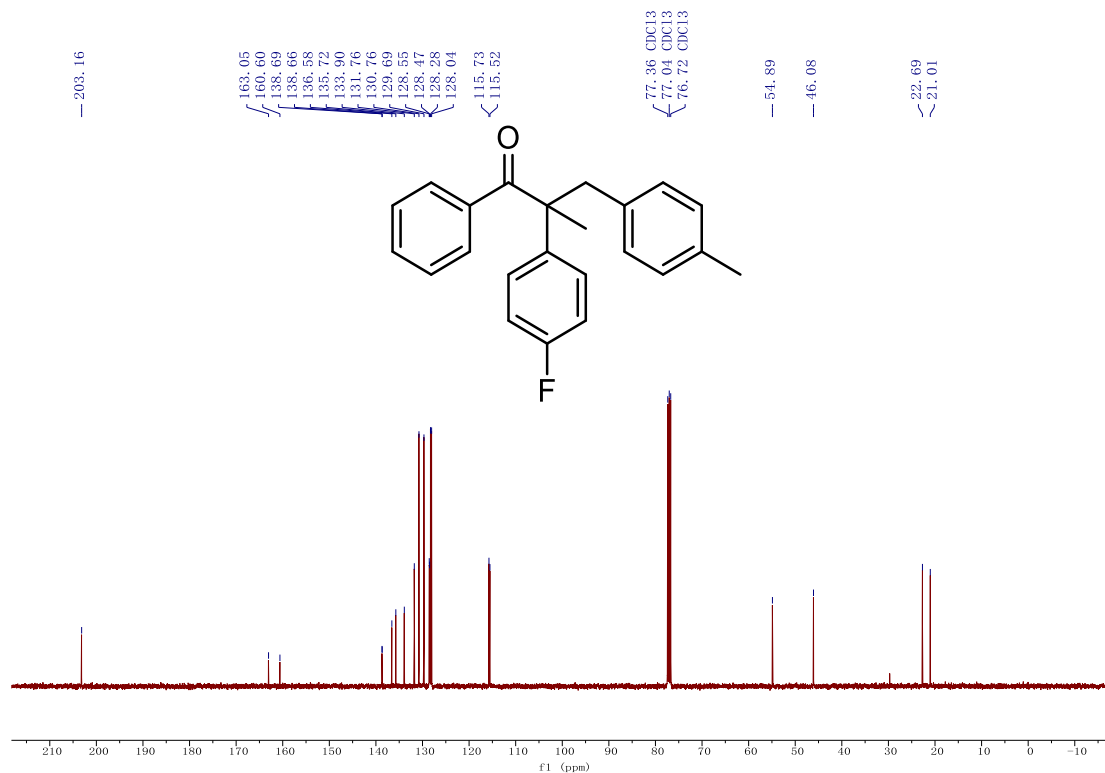

<sup>19</sup>F NMR-spectrum (376 MHz, CDCl<sub>3</sub>) of **4l**

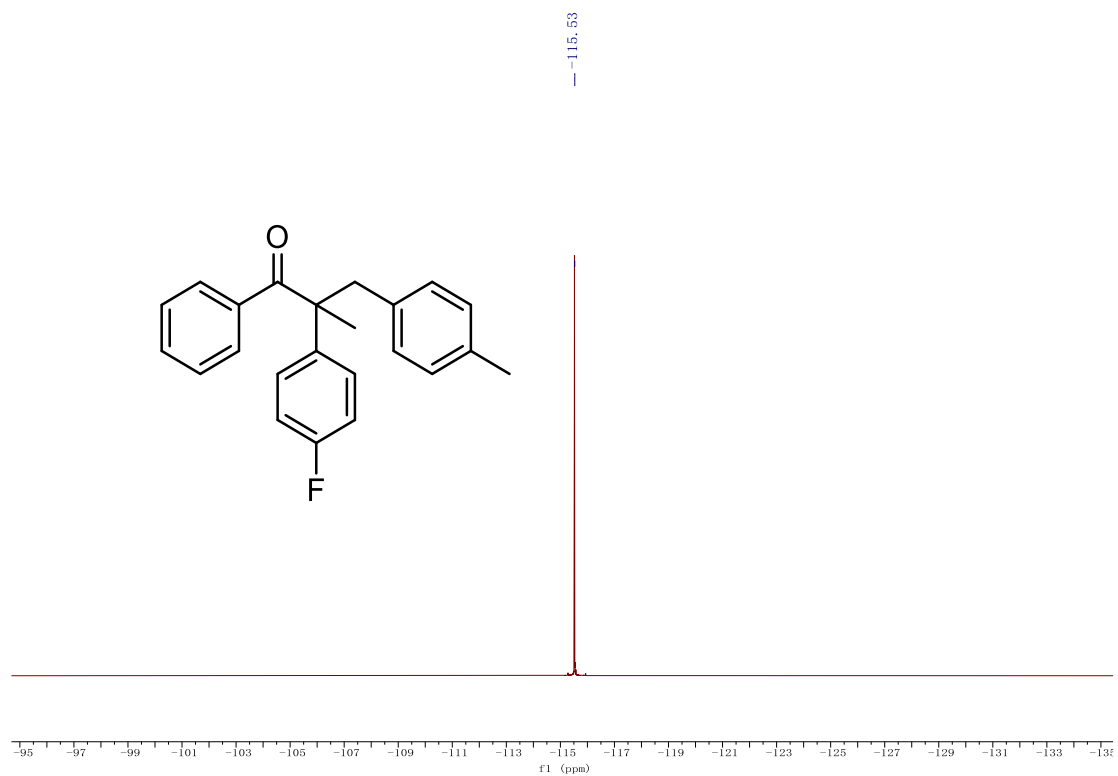

<sup>1</sup>H NMR-spectrum (400MHz, CDCl<sub>3</sub>) of **4m**

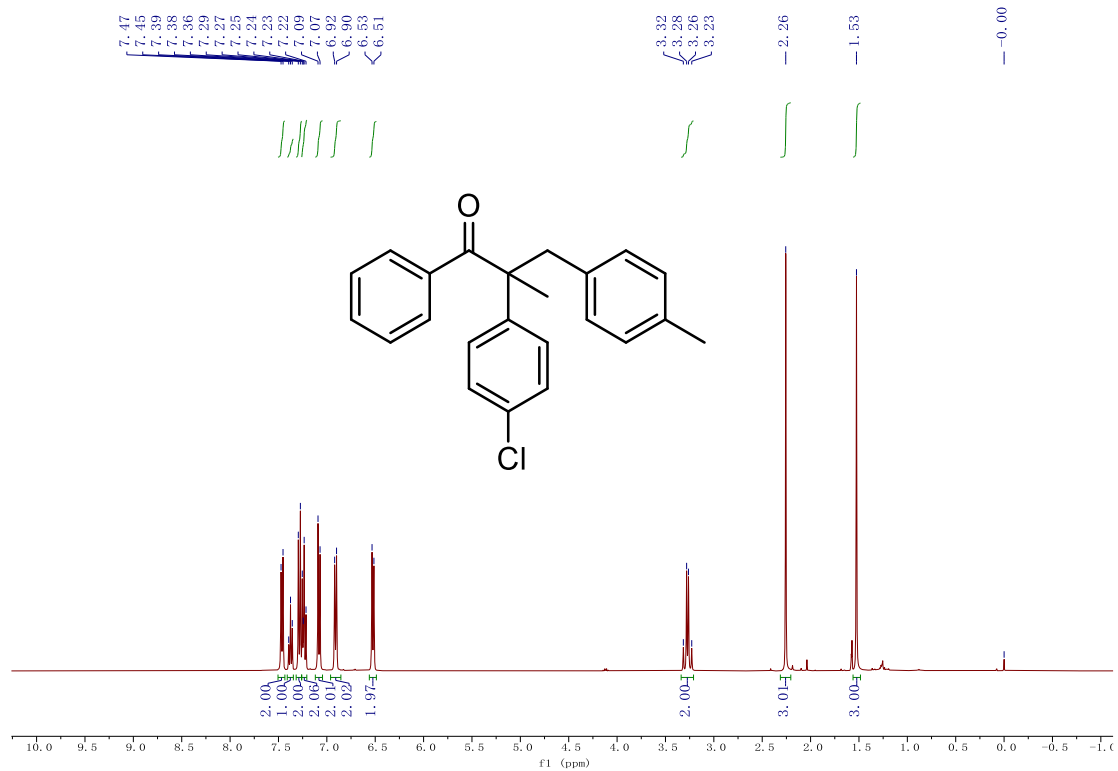

$^{13}\text{C}\{^1\text{H}\}$  NMR-spectrum (101MHz,  $\text{CDCl}_3$ ) of **4m**

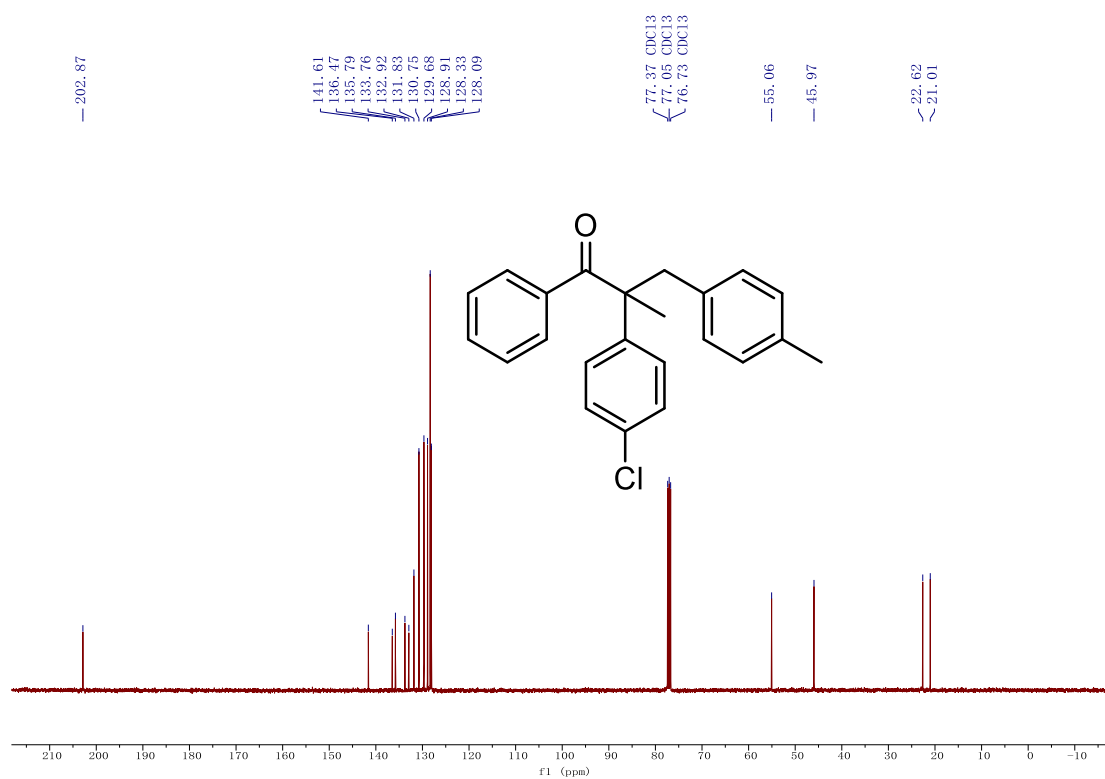

$^1\text{H}$  NMR-spectrum (400MHz,  $\text{CDCl}_3$ ) of **4n**

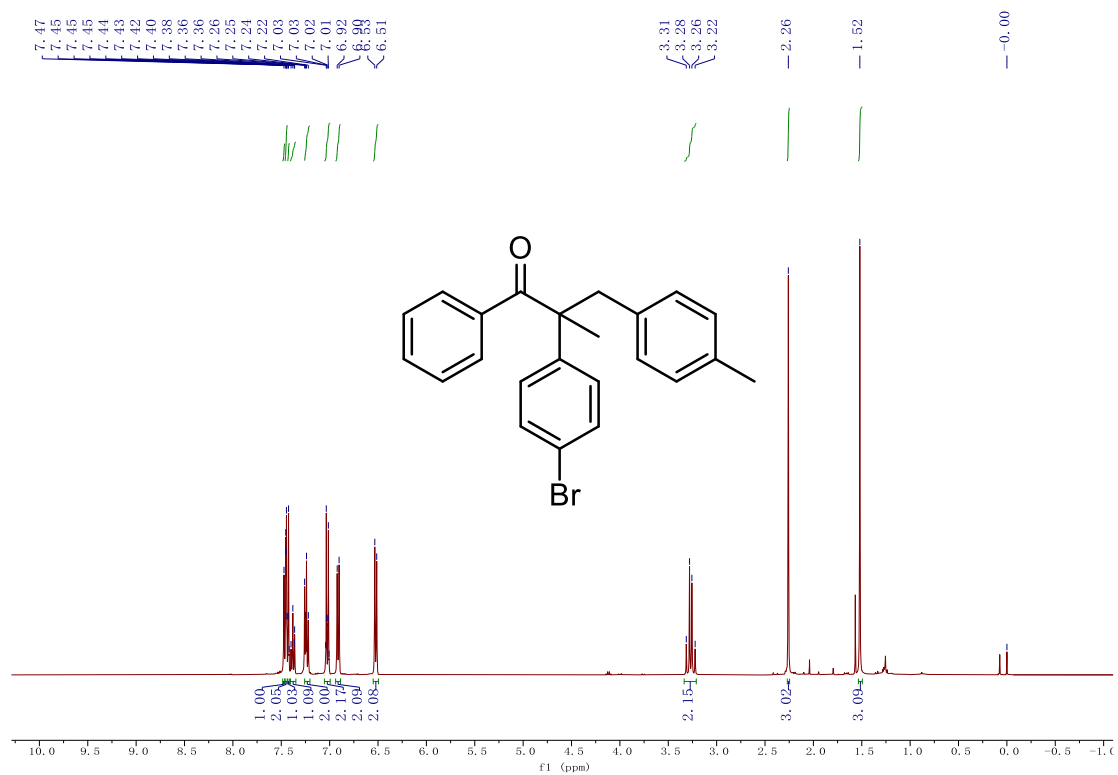

$^{13}\text{C}\{^1\text{H}\}$  NMR-spectrum (101MHz,  $\text{CDCl}_3$ ) of **4n**

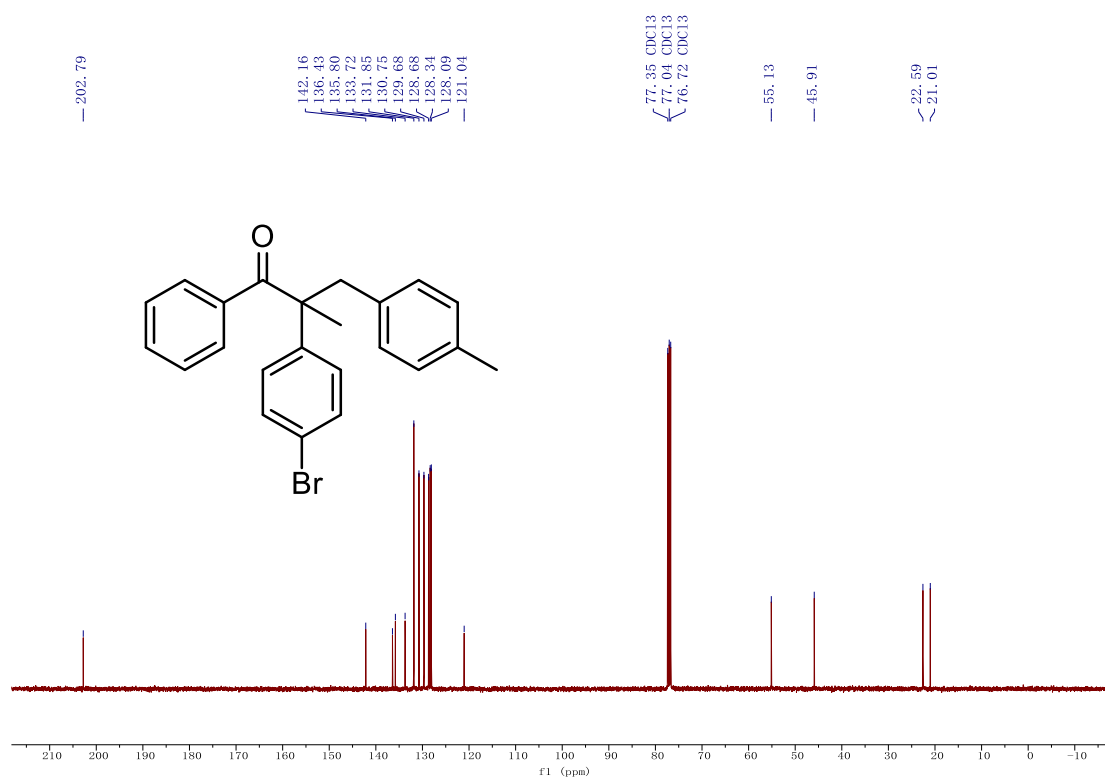

$^1\text{H}$  NMR-spectrum (400MHz,  $\text{CDCl}_3$ ) of **4o**

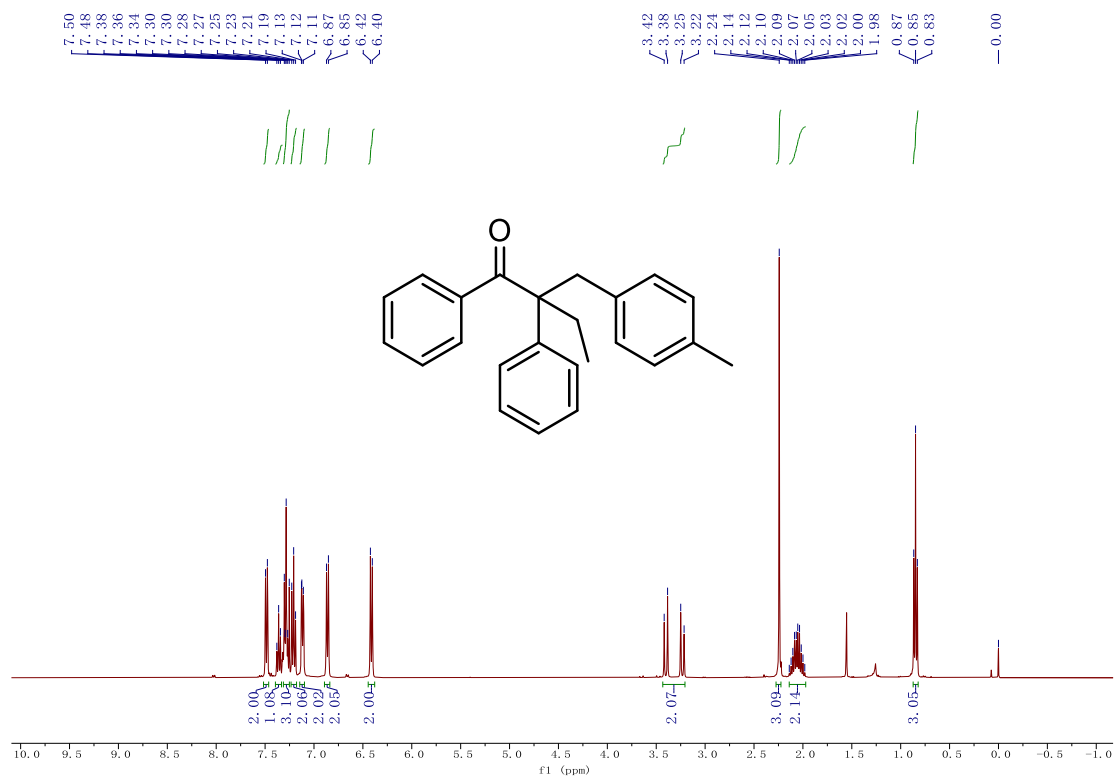

$^{13}\text{C}\{^1\text{H}\}$  NMR-spectrum (101MHz,  $\text{CDCl}_3$ ) of **4o**

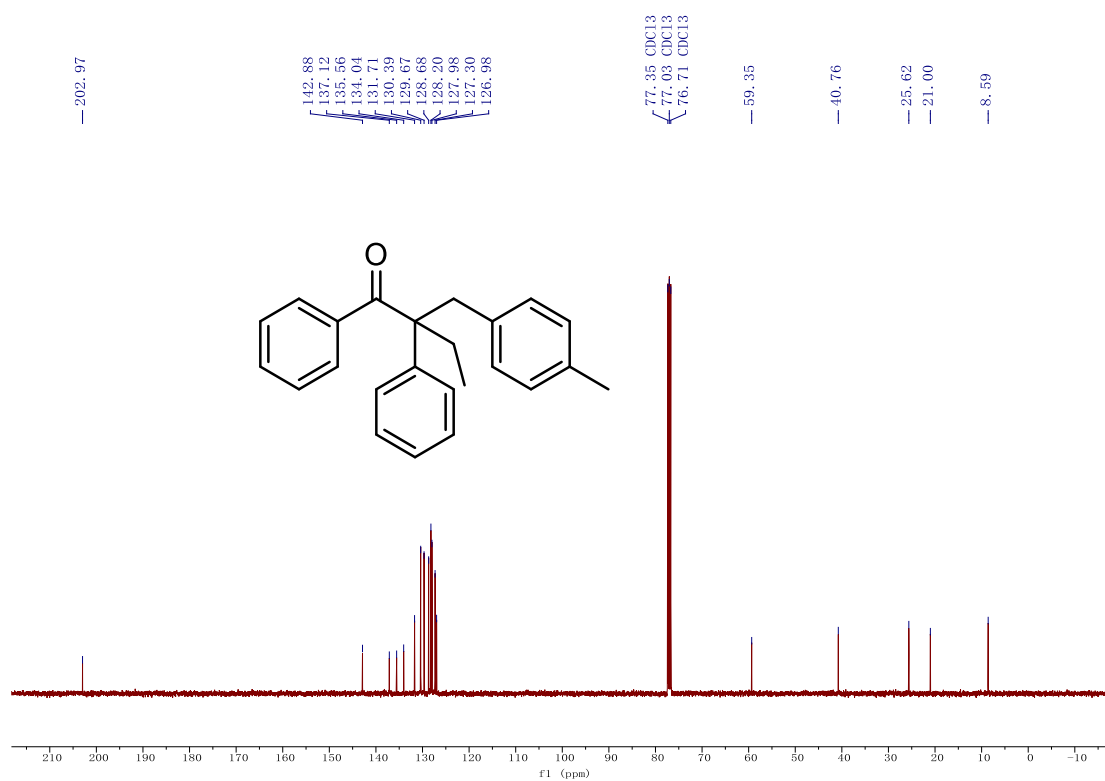

$^1\text{H}$  NMR-spectrum (400MHz,  $\text{CDCl}_3$ ) of **4p**

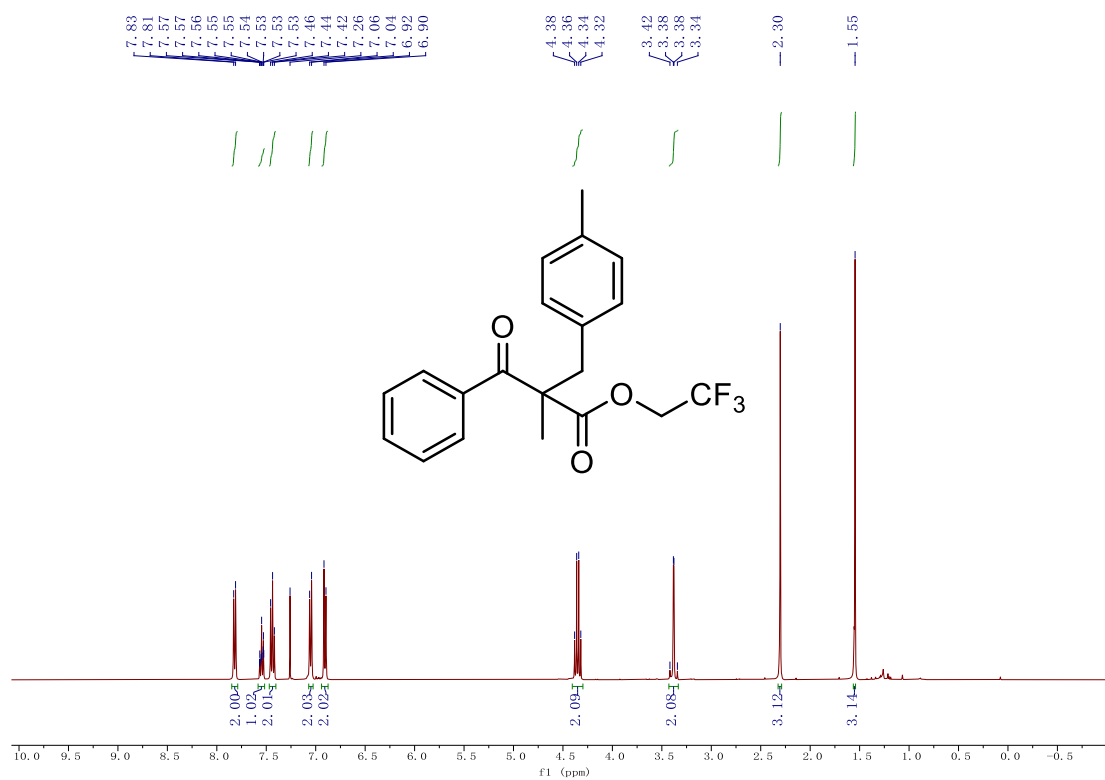

$^{13}\text{C}\{^1\text{H}\}$  NMR-spectrum (101MHz,  $\text{CDCl}_3$ ) of **4p**

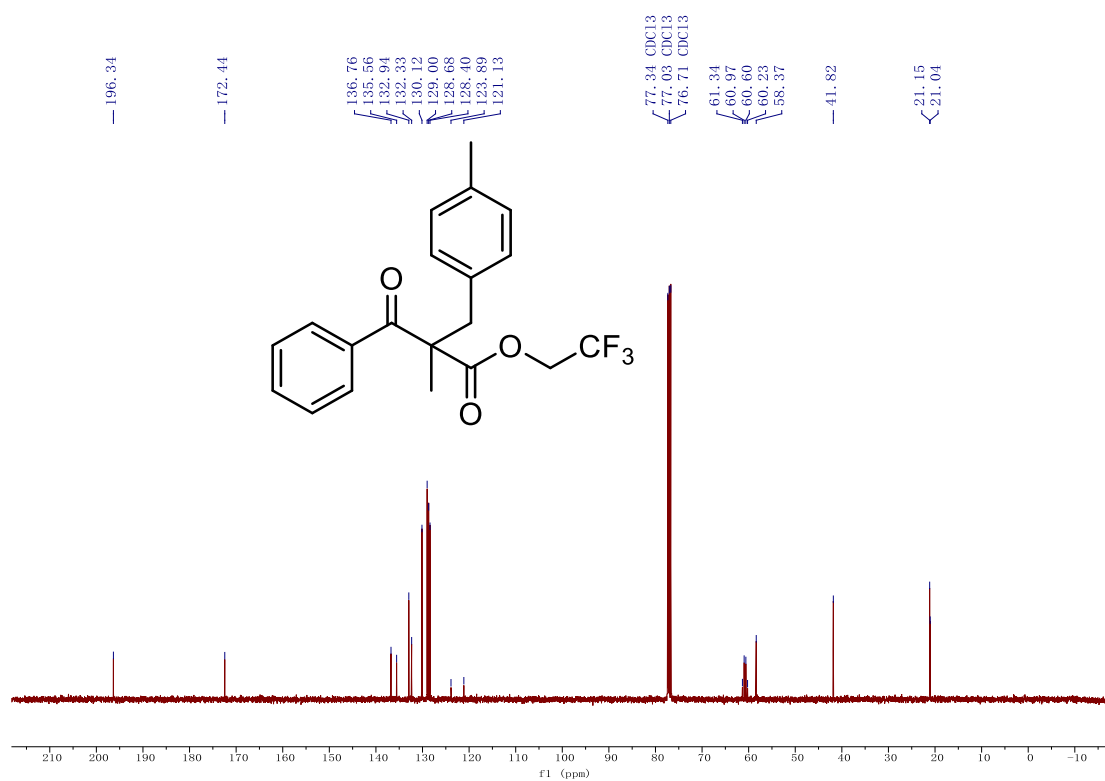

$^{19}\text{F}$  NMR-spectrum (376 MHz,  $\text{CDCl}_3$ ) of **4p**

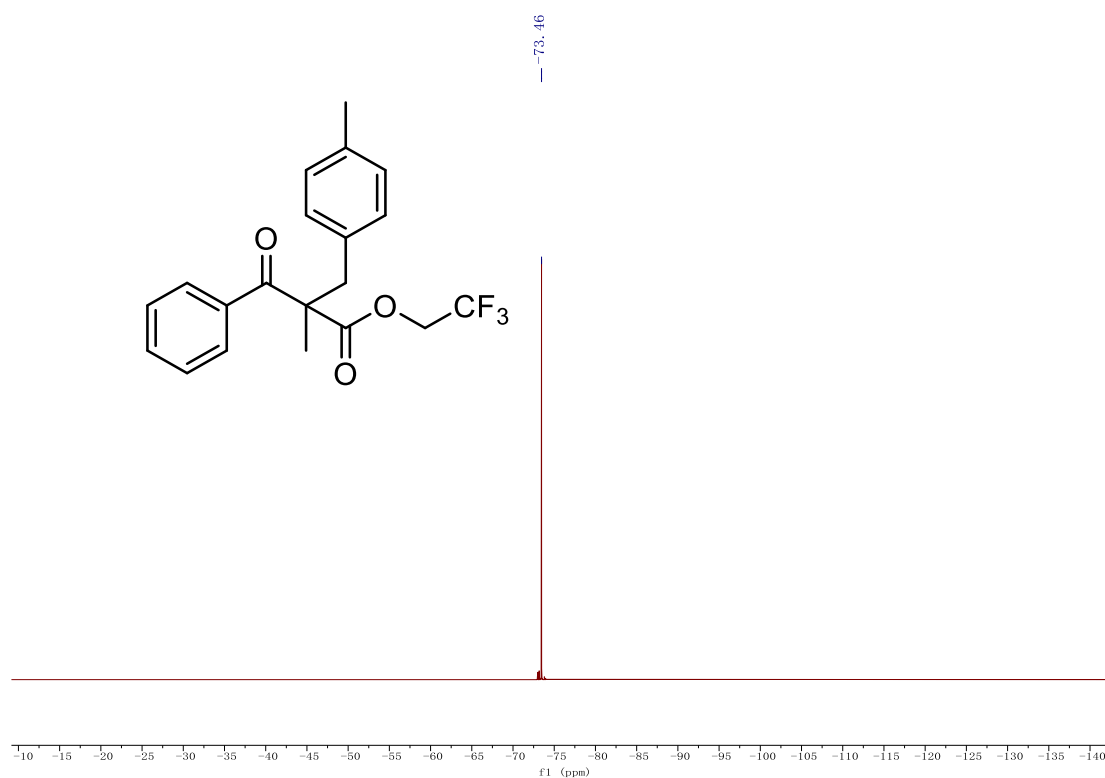

<sup>1</sup>H NMR-spectrum (400MHz, CDCl<sub>3</sub>) of **4q**

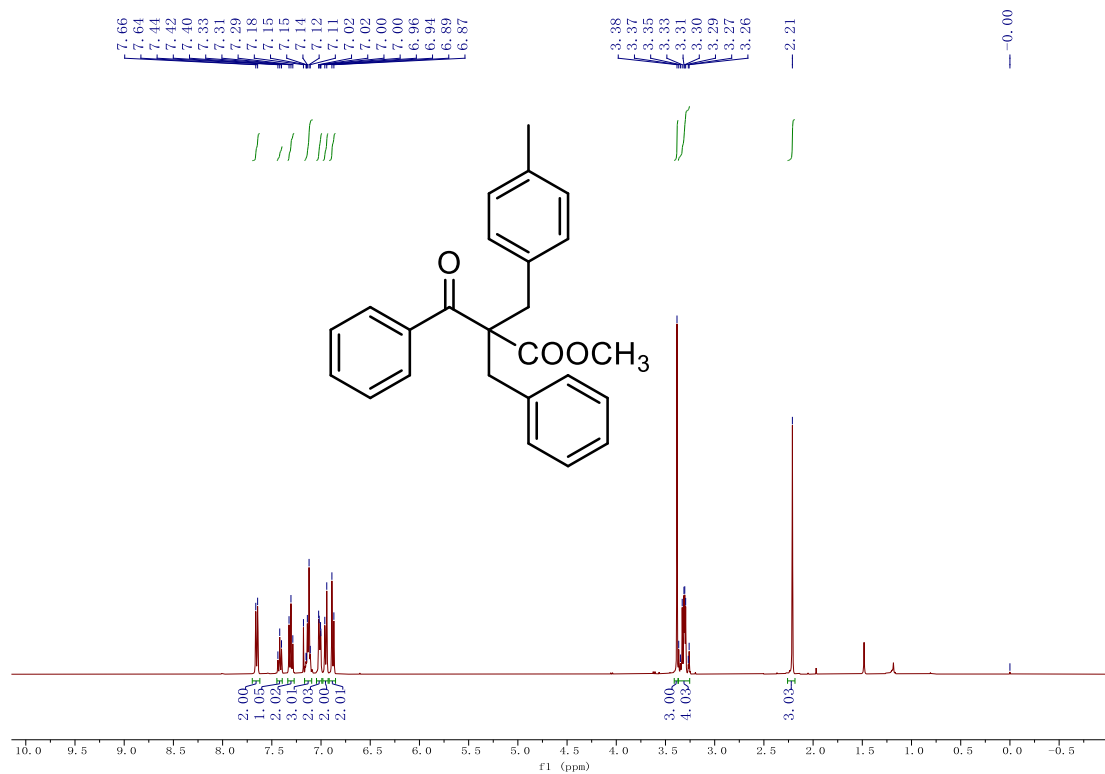

<sup>13</sup>C{<sup>1</sup>H} NMR-spectrum (101MHz, CDCl<sub>3</sub>) of **4q**

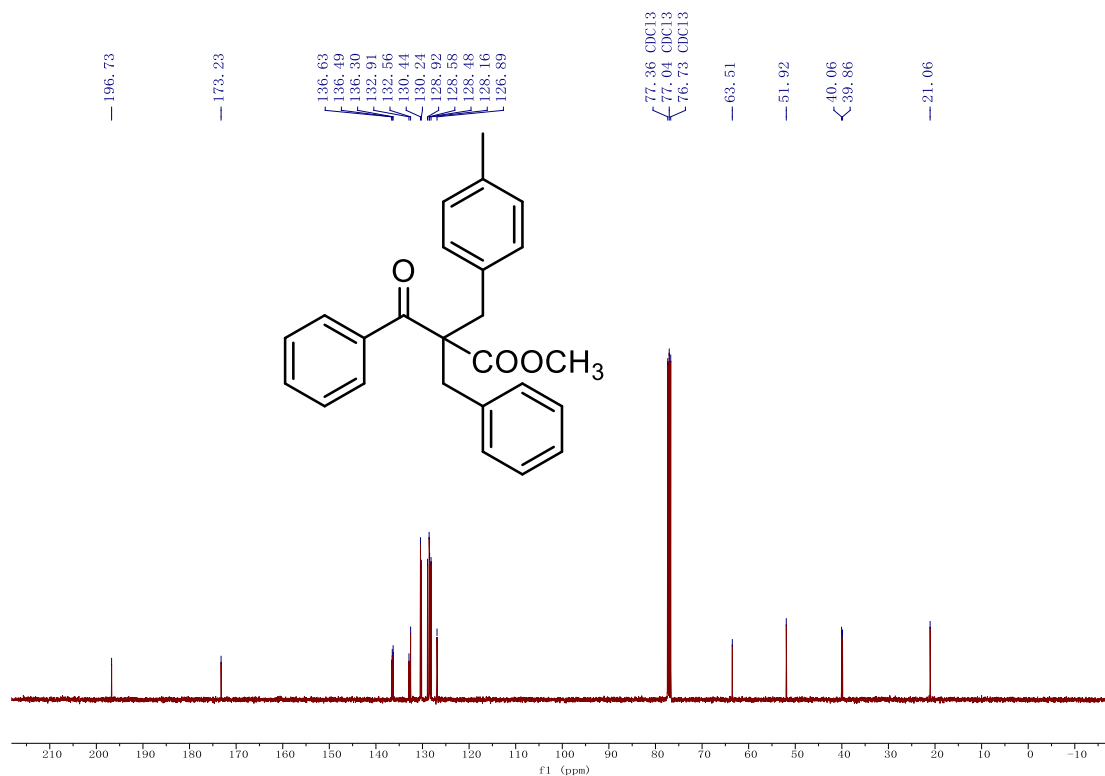

<sup>1</sup>H NMR-spectrum (400MHz, CDCl<sub>3</sub>) of 4r

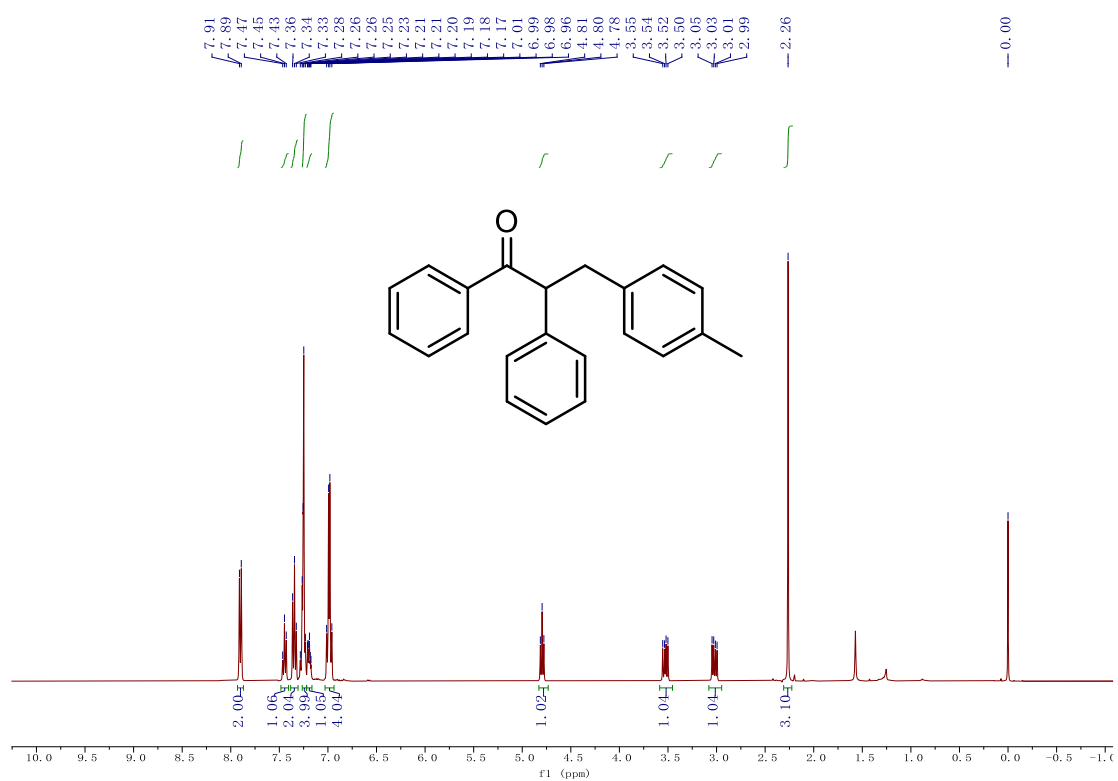

<sup>13</sup>C{<sup>1</sup>H} NMR-spectrum (101MHz, CDCl<sub>3</sub>) of 4r

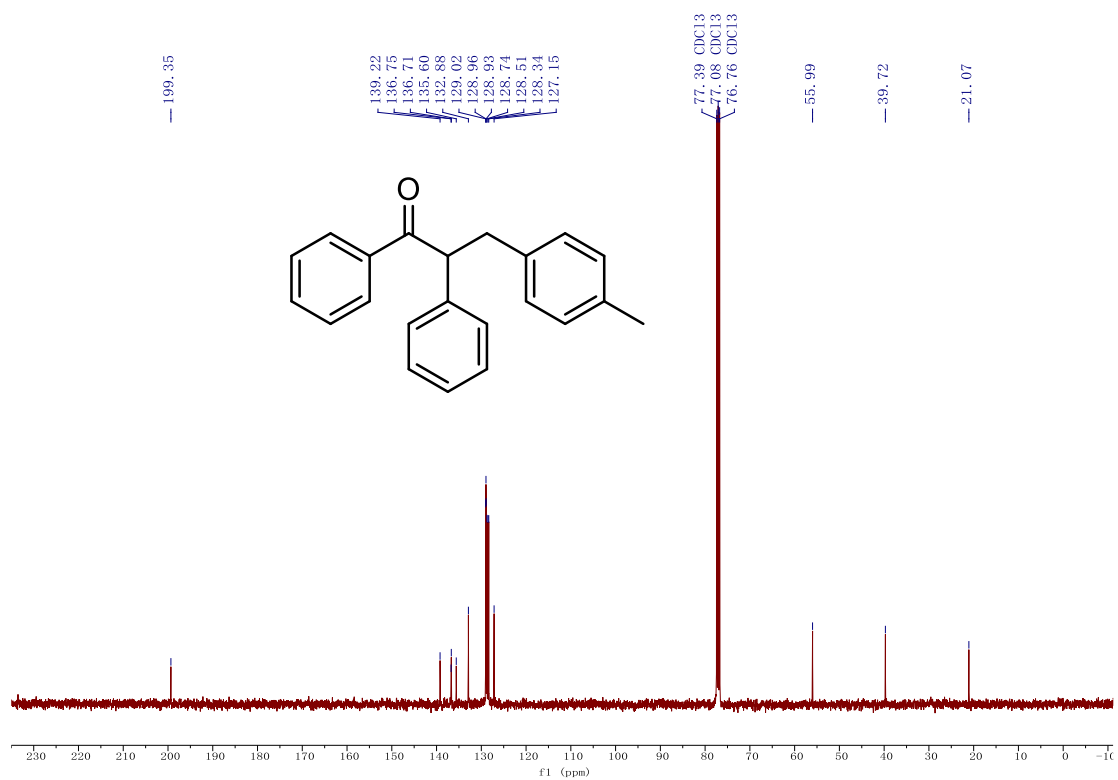

<sup>1</sup>H NMR-spectrum (400MHz, CDCl<sub>3</sub>) of 4s

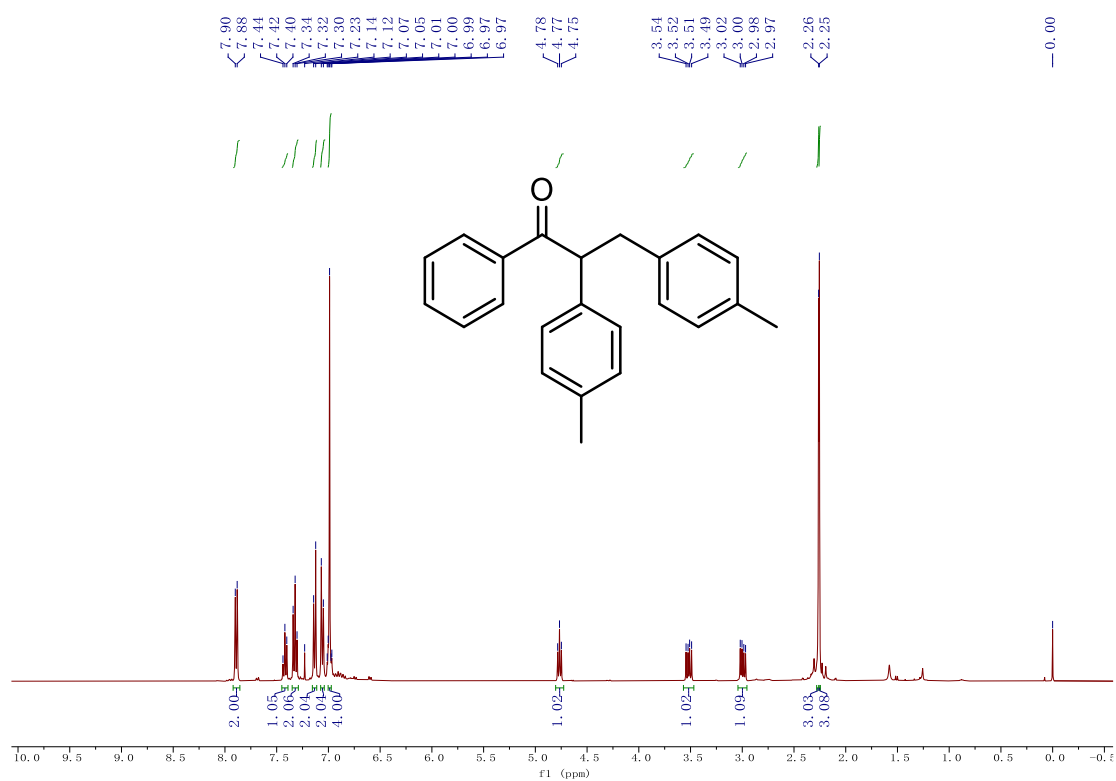

<sup>13</sup>C{<sup>1</sup>H} NMR -spectrum (101MHz, CDCl<sub>3</sub>) of 4s

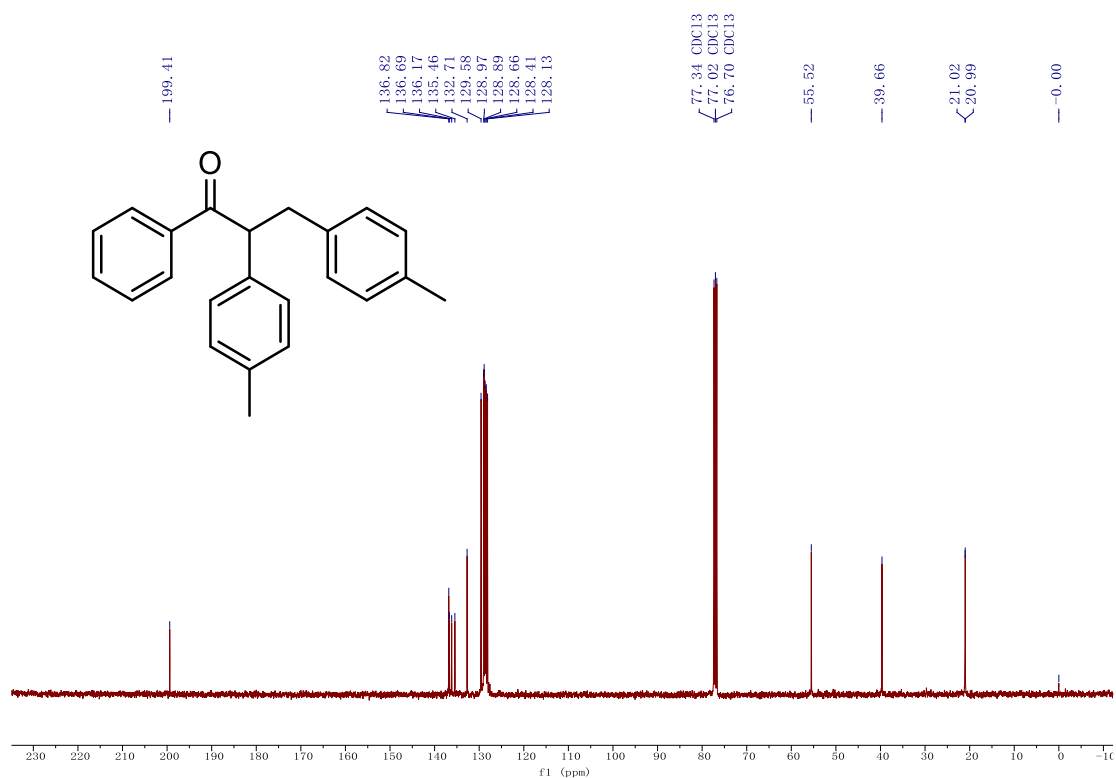

$^1\text{H}$  NMR-spectrum (400MHz,  $\text{CDCl}_3$ ) of **4t**

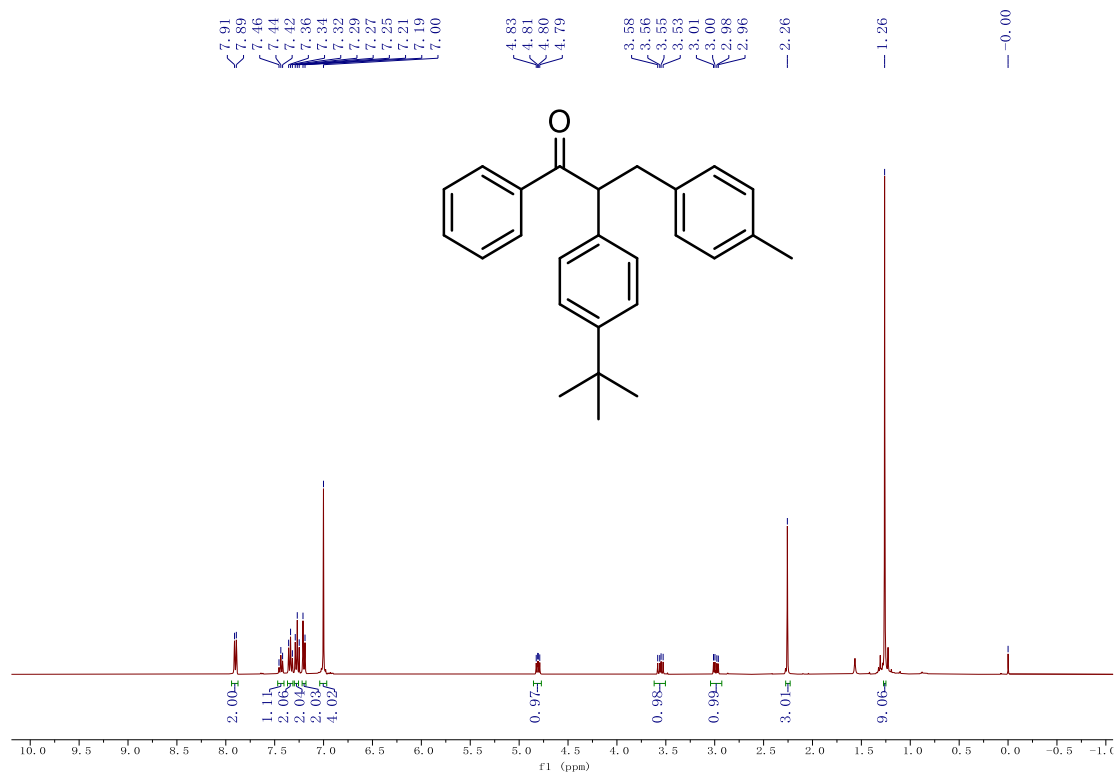

$^{13}\text{C}\{^1\text{H}\}$  NMR -spectrum (101MHz,  $\text{CDCl}_3$ ) of **4t**

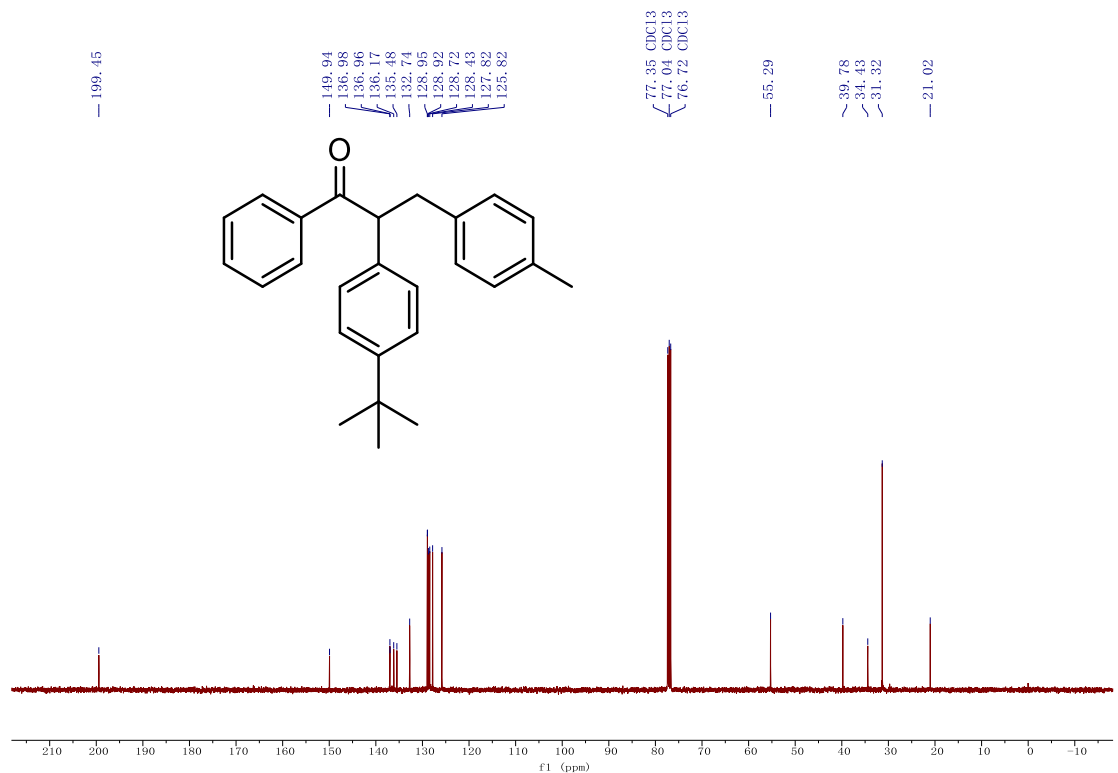

<sup>1</sup>H NMR-spectrum (400MHz, CDCl<sub>3</sub>) of **4u**

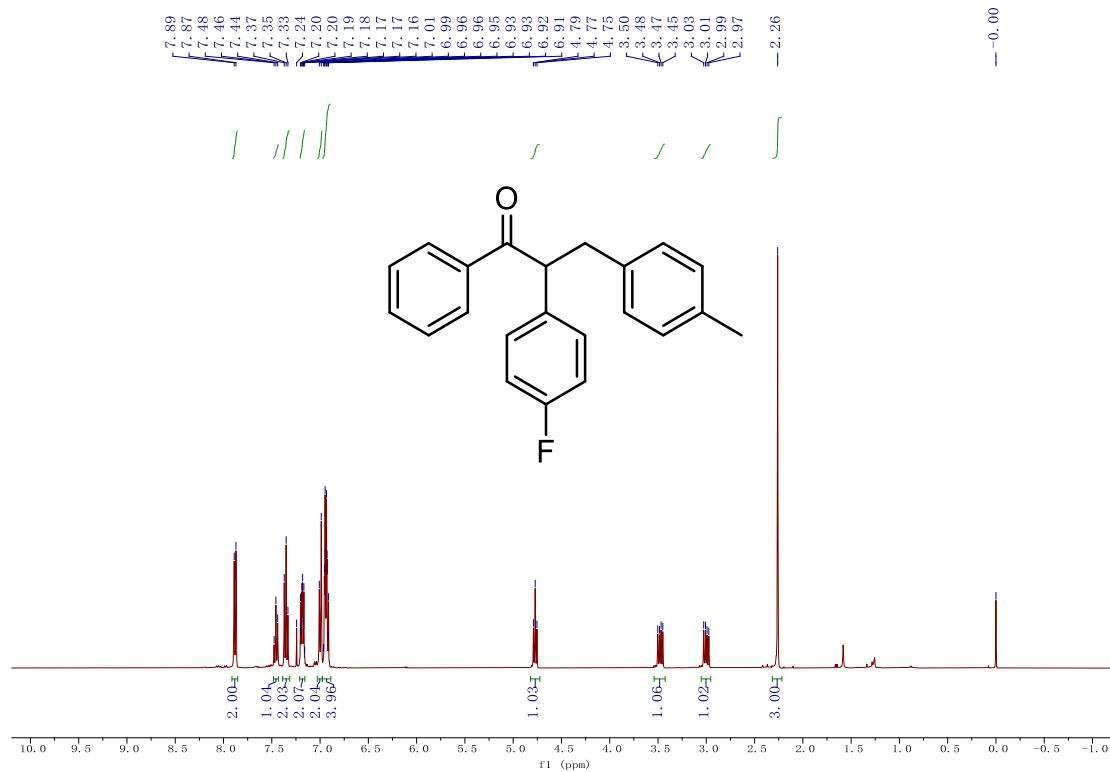

<sup>13</sup>C{<sup>1</sup>H} NMR -spectrum (101MHz, CDCl<sub>3</sub>) of **4u**

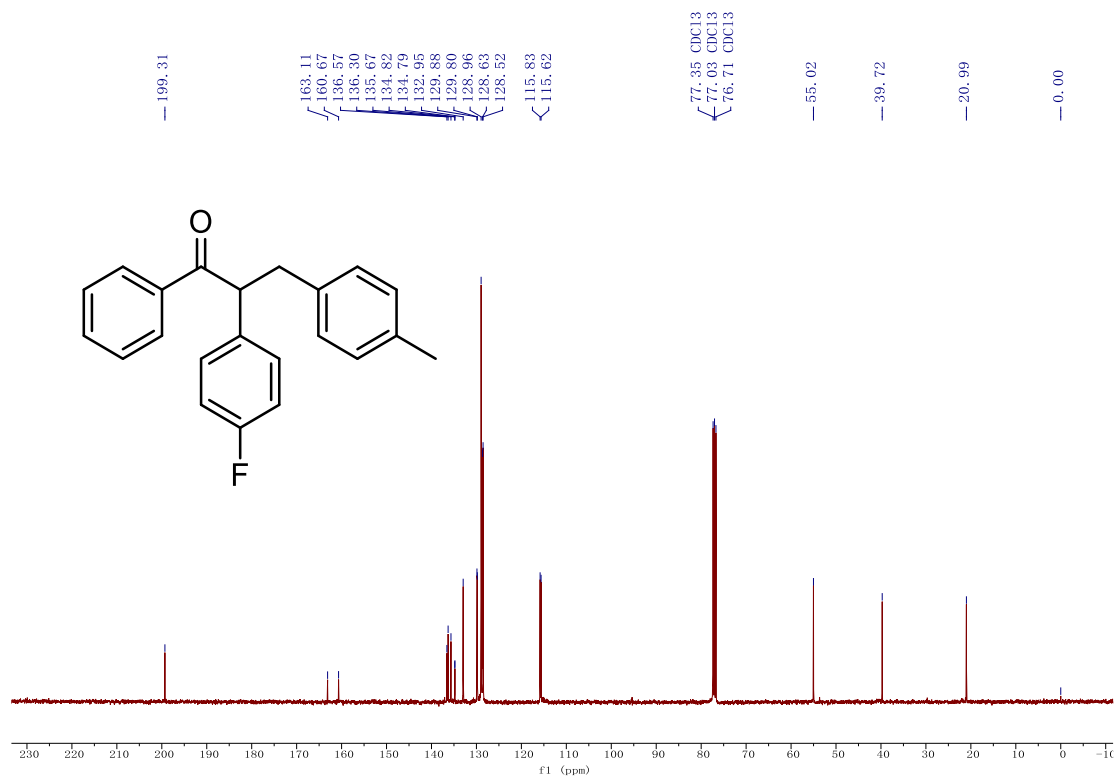



$^{13}\text{C}\{^1\text{H}\}$  NMR -spectrum (101MHz,  $\text{CDCl}_3$ ) of **4v**

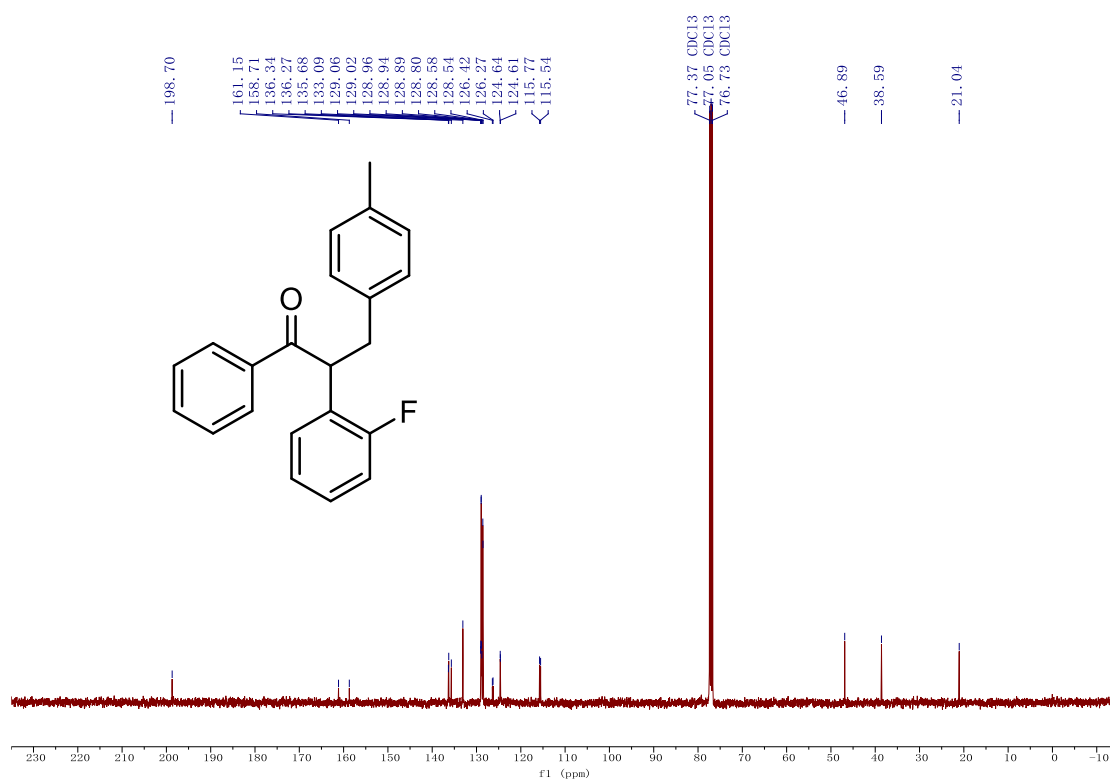

$^{19}\text{F}$  NMR-spectrum (376 MHz,  $\text{CDCl}_3$ ) of **4v**

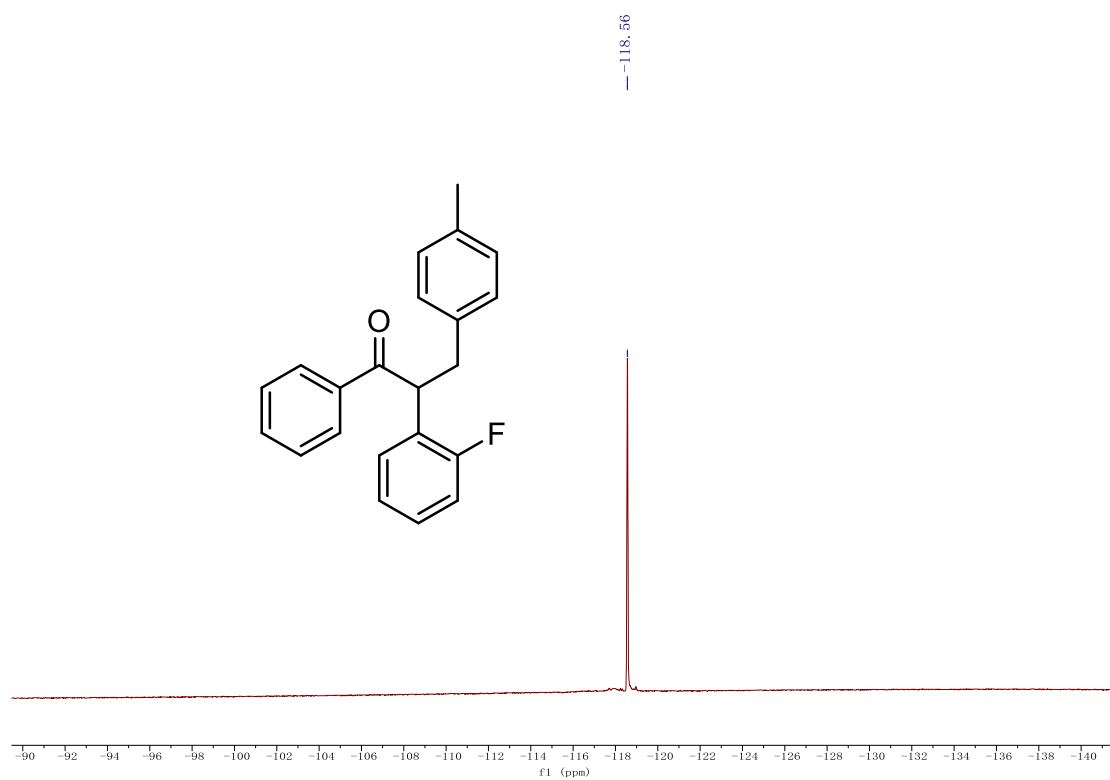

$^1\text{H}$  NMR-spectrum (400MHz,  $\text{CDCl}_3$ ) of **4w**

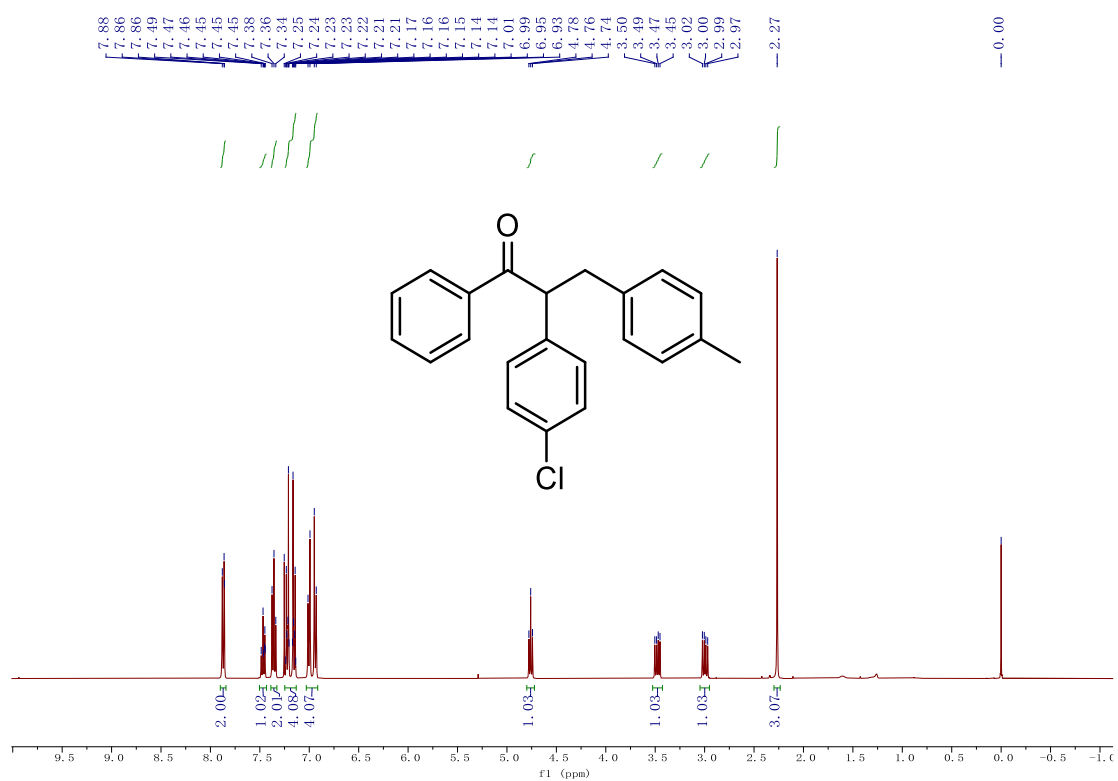

$^{13}\text{C}\{^1\text{H}\}$  NMR -spectrum (101MHz,  $\text{CDCl}_3$ ) of **4w**

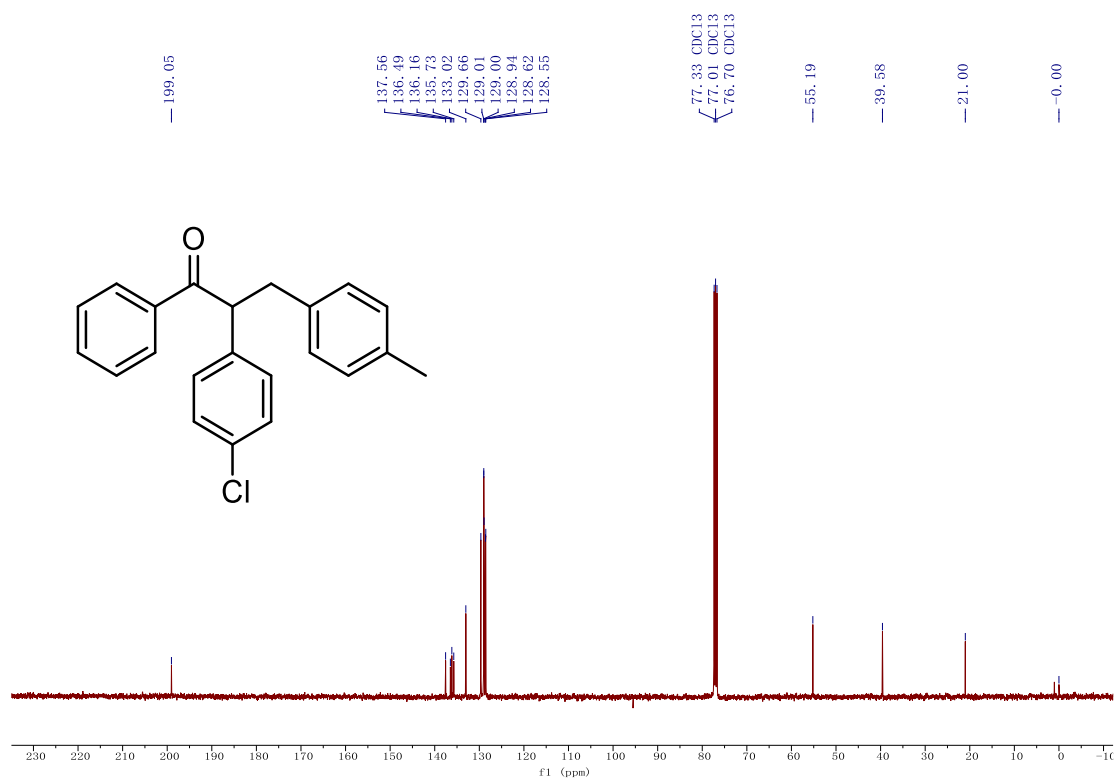

$^1\text{H}$  NMR-spectrum (400MHz,  $\text{CDCl}_3$ ) of **4x**

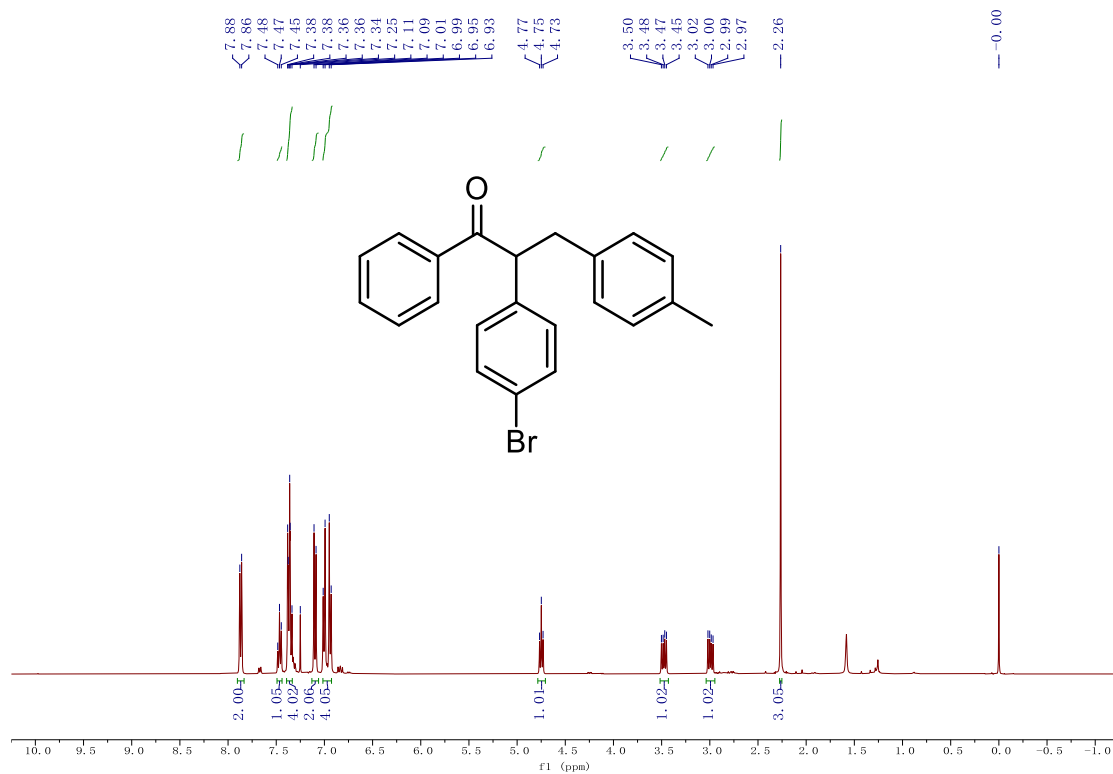

$^{13}\text{C}\{^1\text{H}\}$  NMR-spectrum (101MHz,  $\text{CDCl}_3$ ) of **4x**

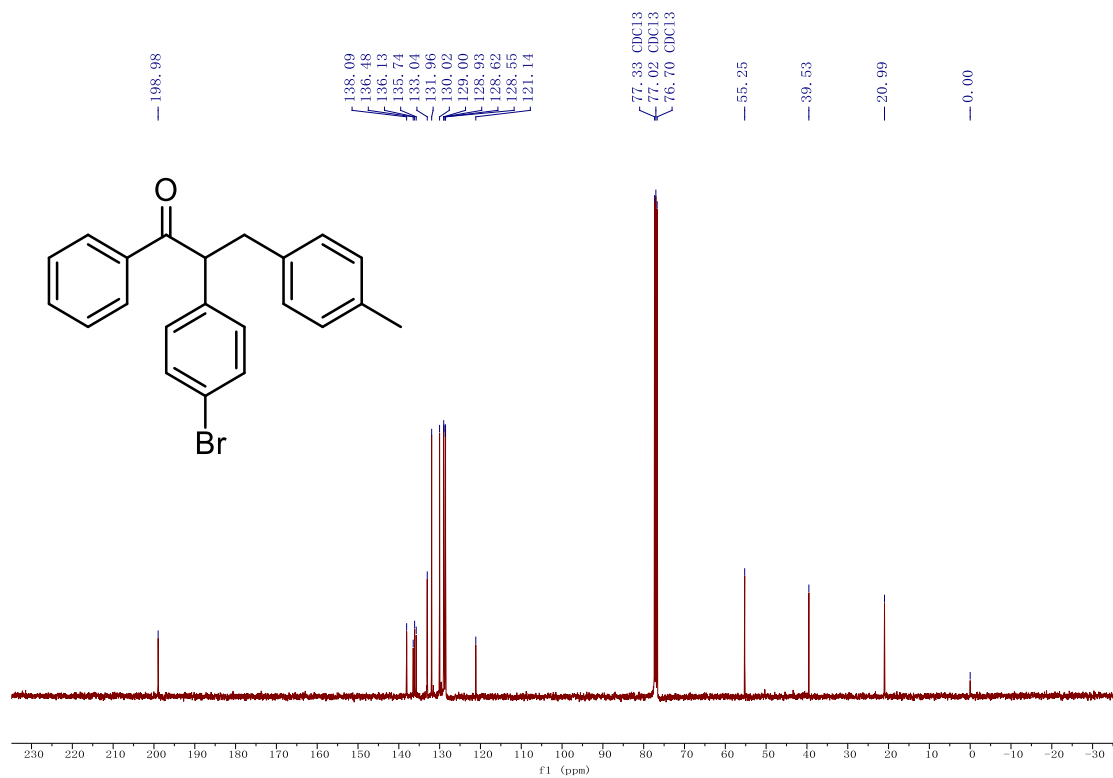

<sup>1</sup>H NMR-spectrum (400MHz, CDCl<sub>3</sub>) of **5a**

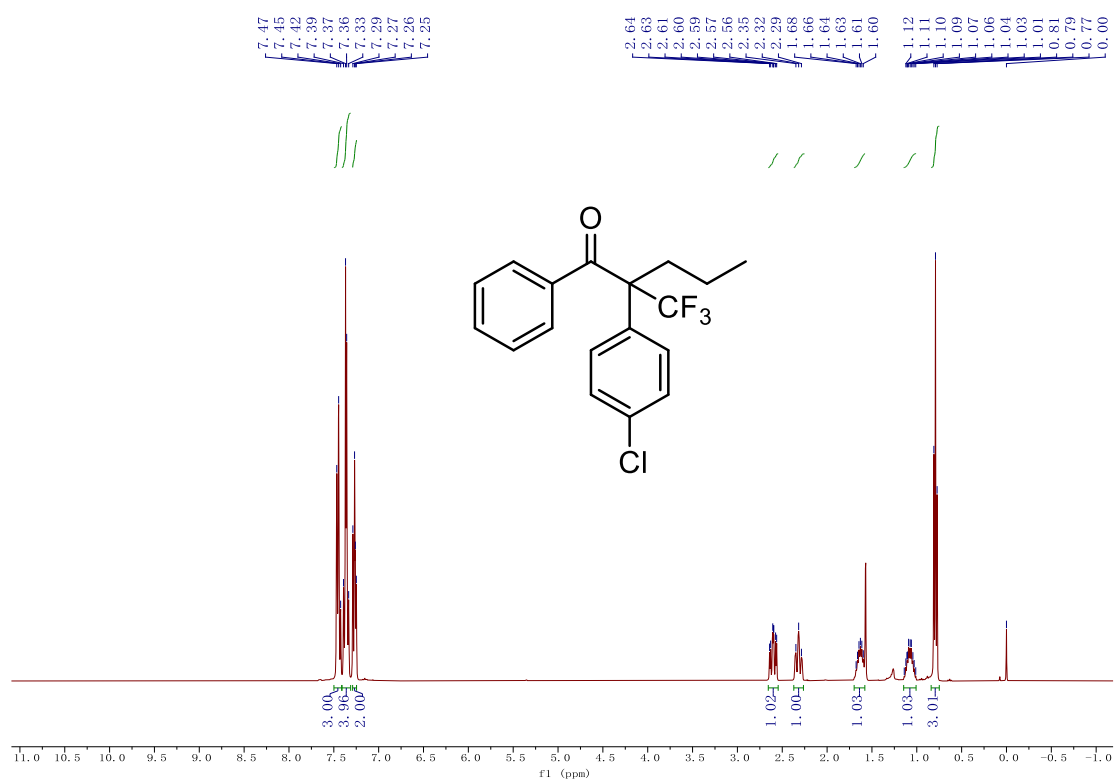

<sup>13</sup>C{<sup>1</sup>H} NMR -spectrum (101MHz, CDCl<sub>3</sub>) of **5a**

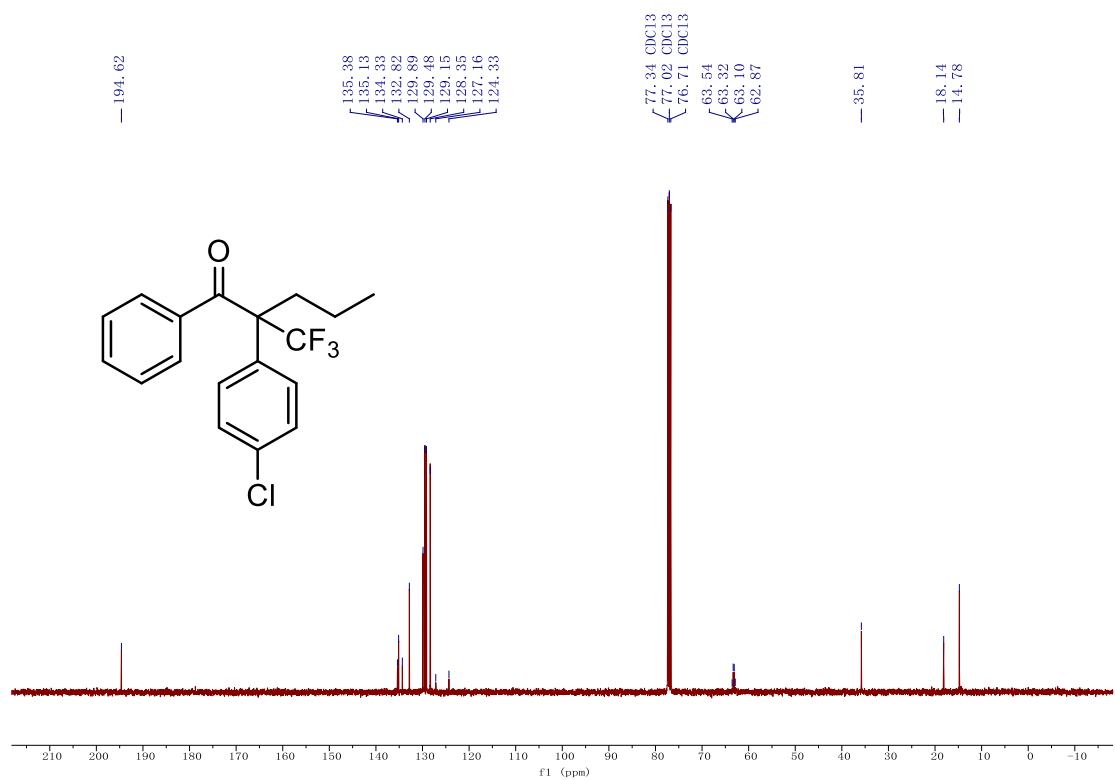

**<sup>19</sup>F NMR-spectrum (376 MHz, CDCl<sub>3</sub>) of 5a**

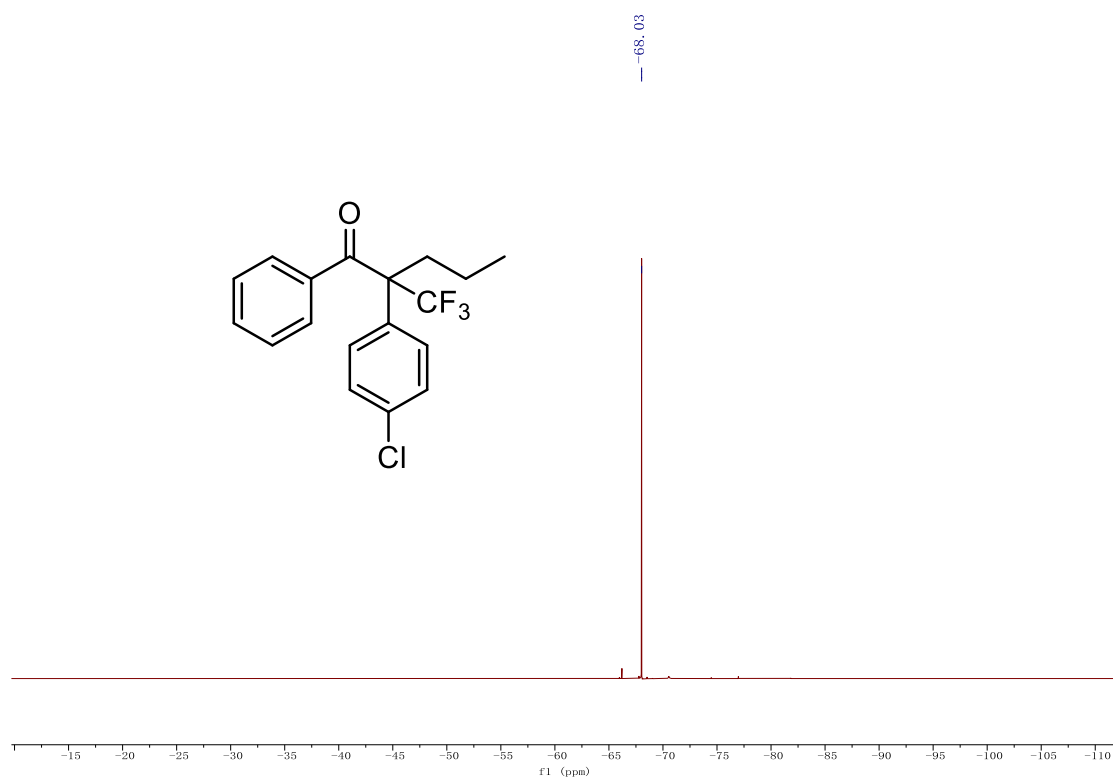

**<sup>1</sup>H NMR-spectrum (400MHz, CDCl<sub>3</sub>) of 5b**

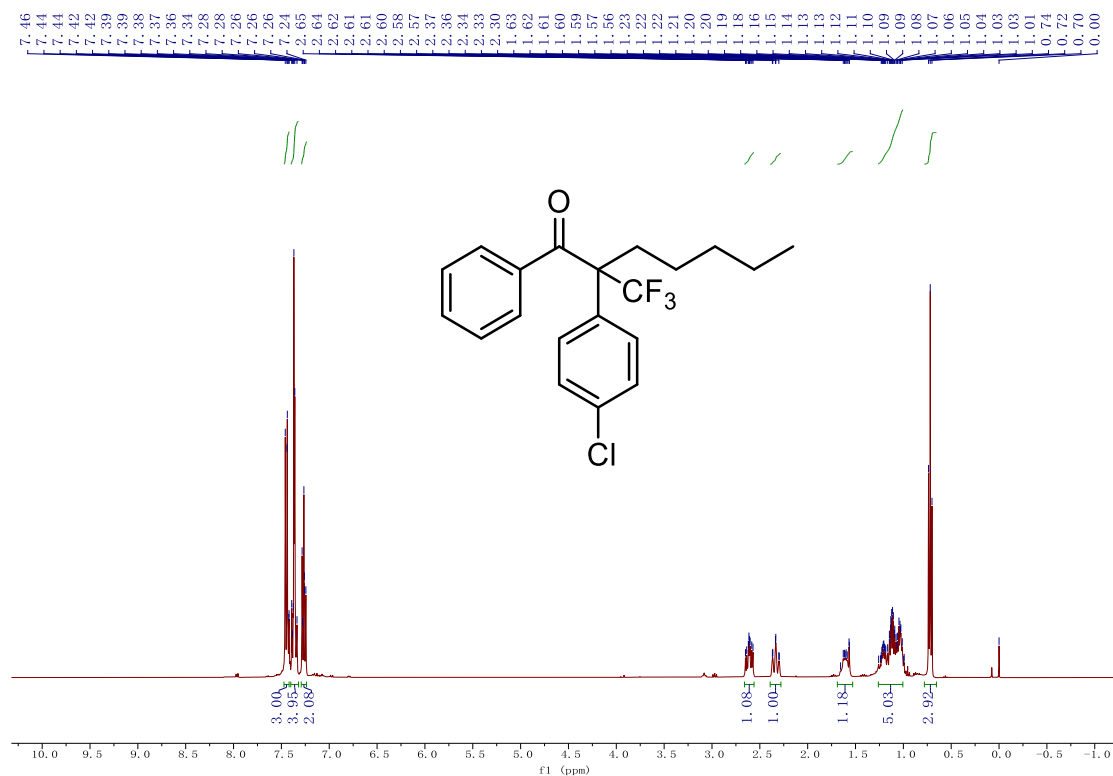

$^{13}\text{C}\{^1\text{H}\}$  NMR-spectrum (101MHz,  $\text{CDCl}_3$ ) of **5b**

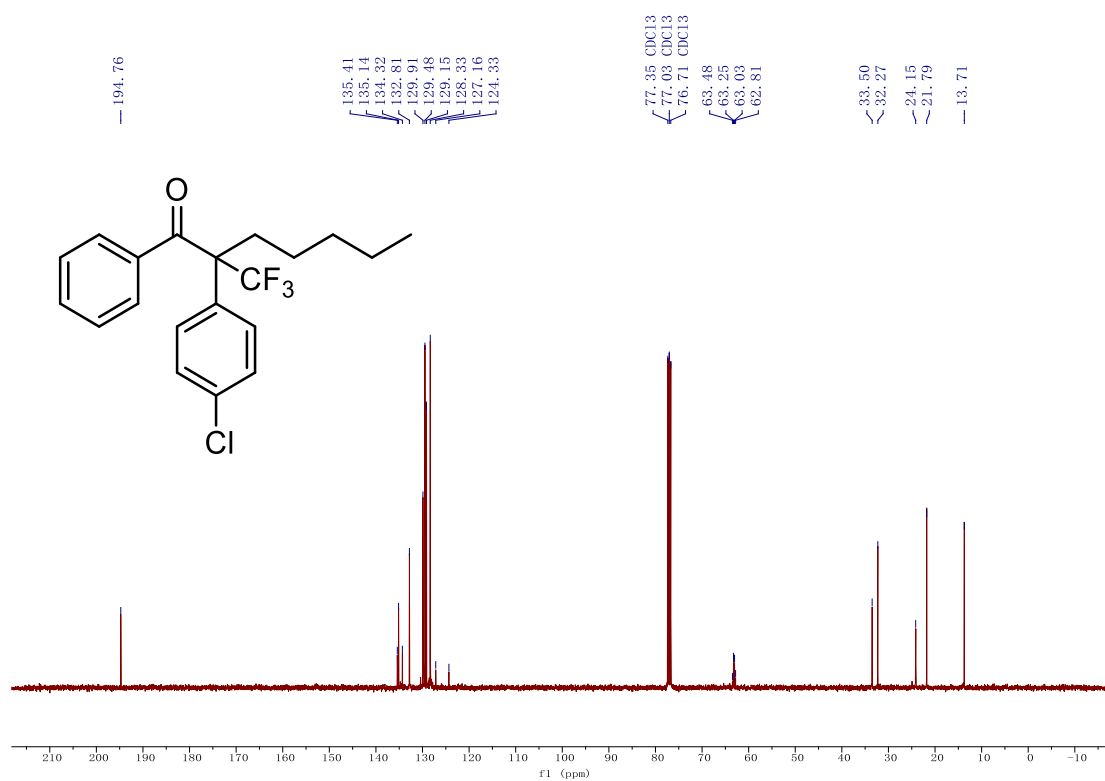

$^{19}\text{F}$  NMR-spectrum (376 MHz,  $\text{CDCl}_3$ ) of **5b**

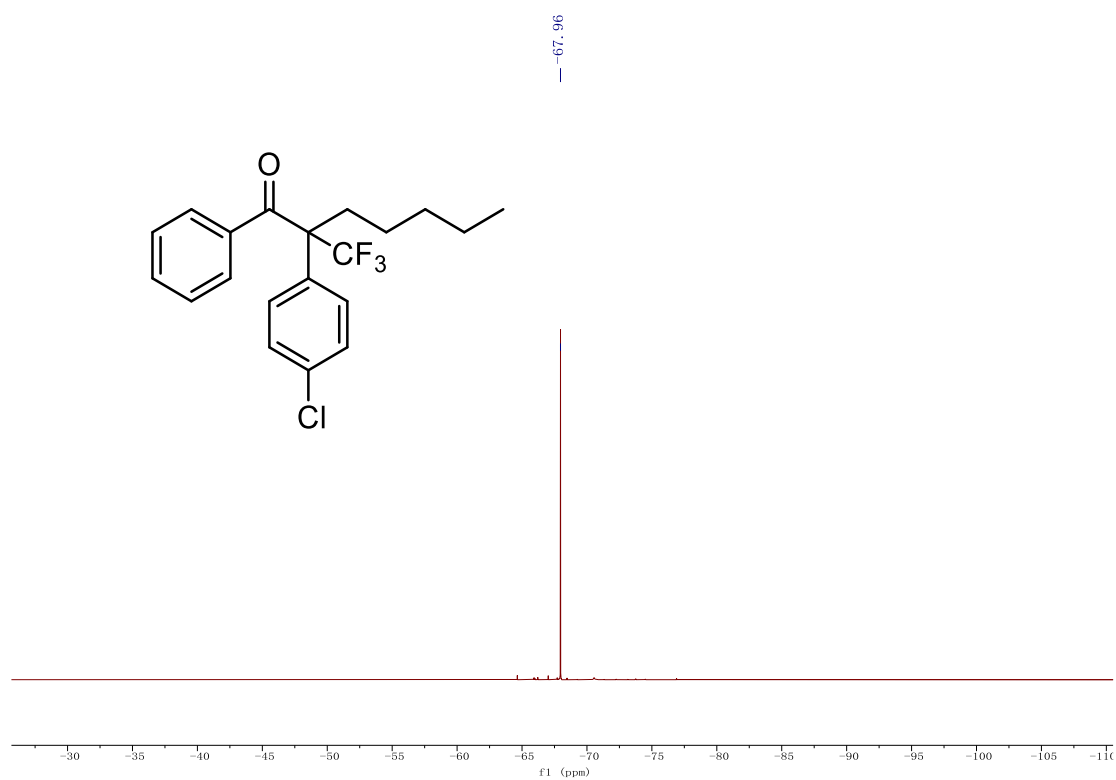

$^1\text{H}$  NMR-spectrum (400MHz,  $\text{CDCl}_3$ ) of **5c**

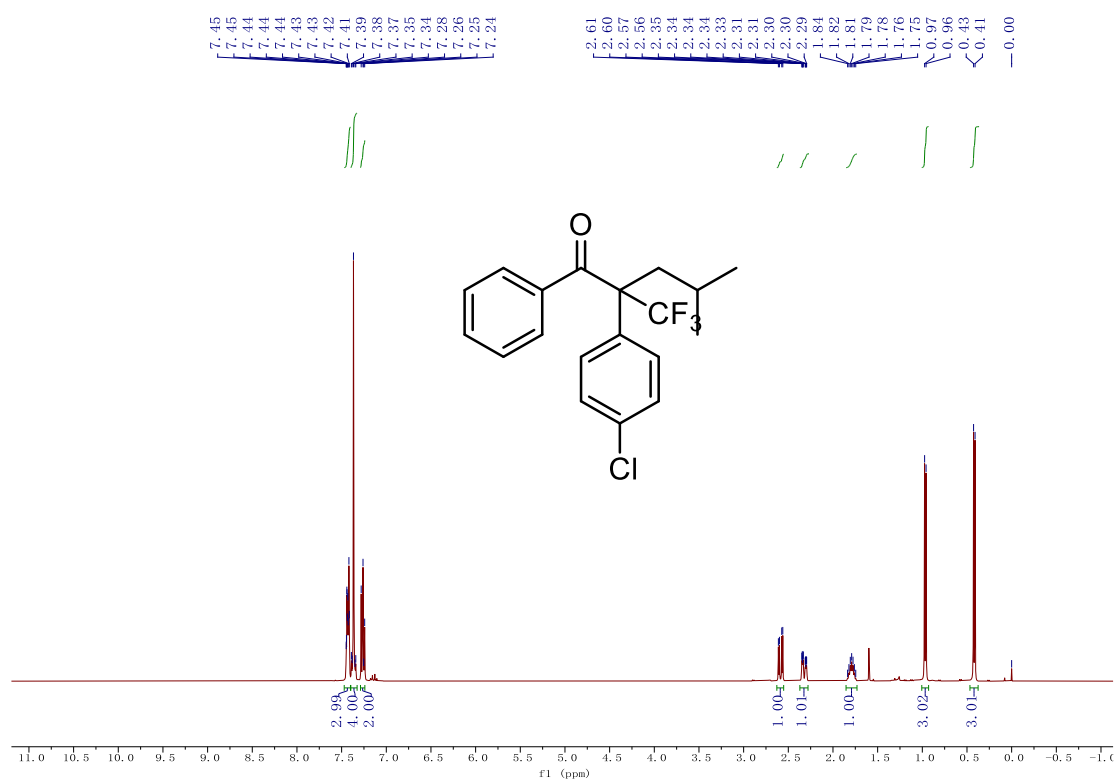

$^{13}\text{C}\{^1\text{H}\}$  NMR-spectrum (101MHz,  $\text{CDCl}_3$ ) of **5c**

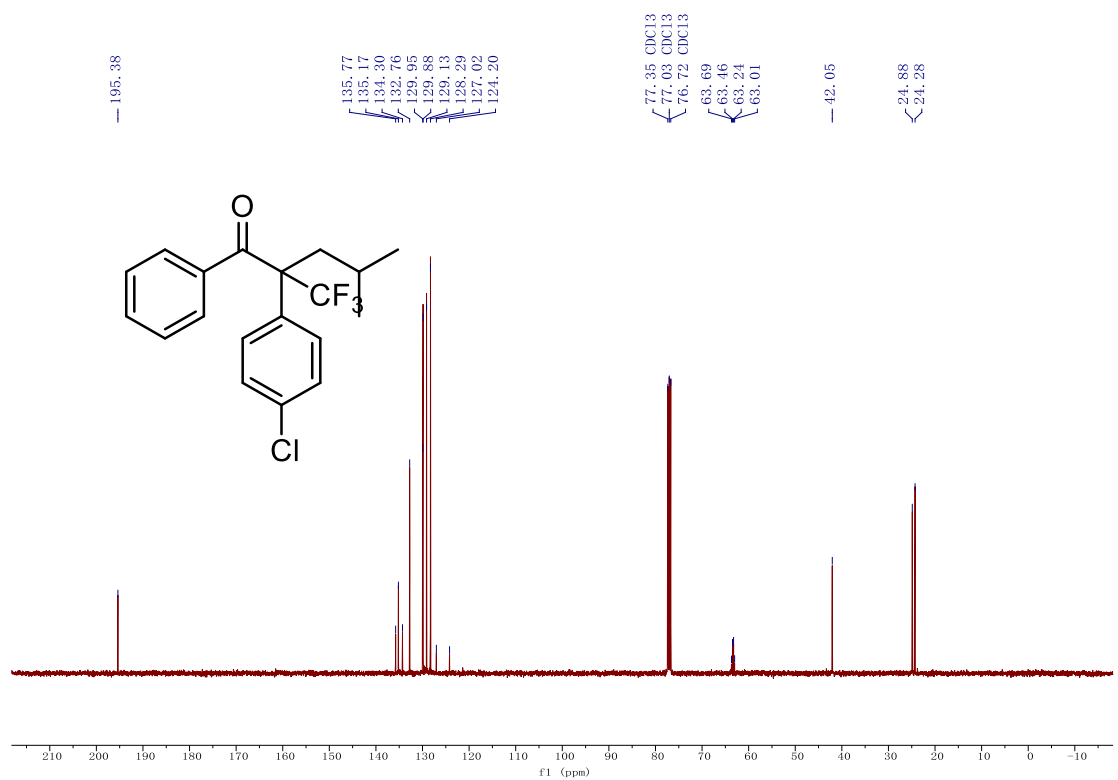

<sup>19</sup>F NMR-spectrum (376 MHz, CDCl<sub>3</sub>) of **5c**

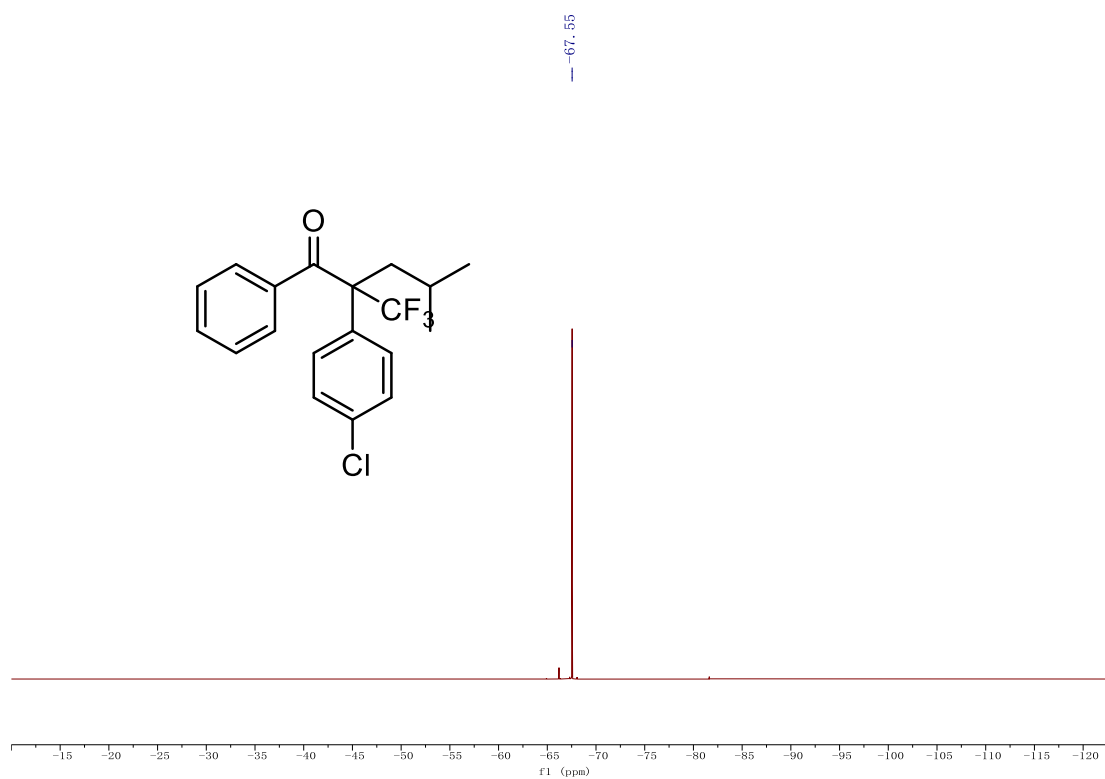

<sup>1</sup>H NMR-spectrum (400MHz, CDCl<sub>3</sub>) of **5d**

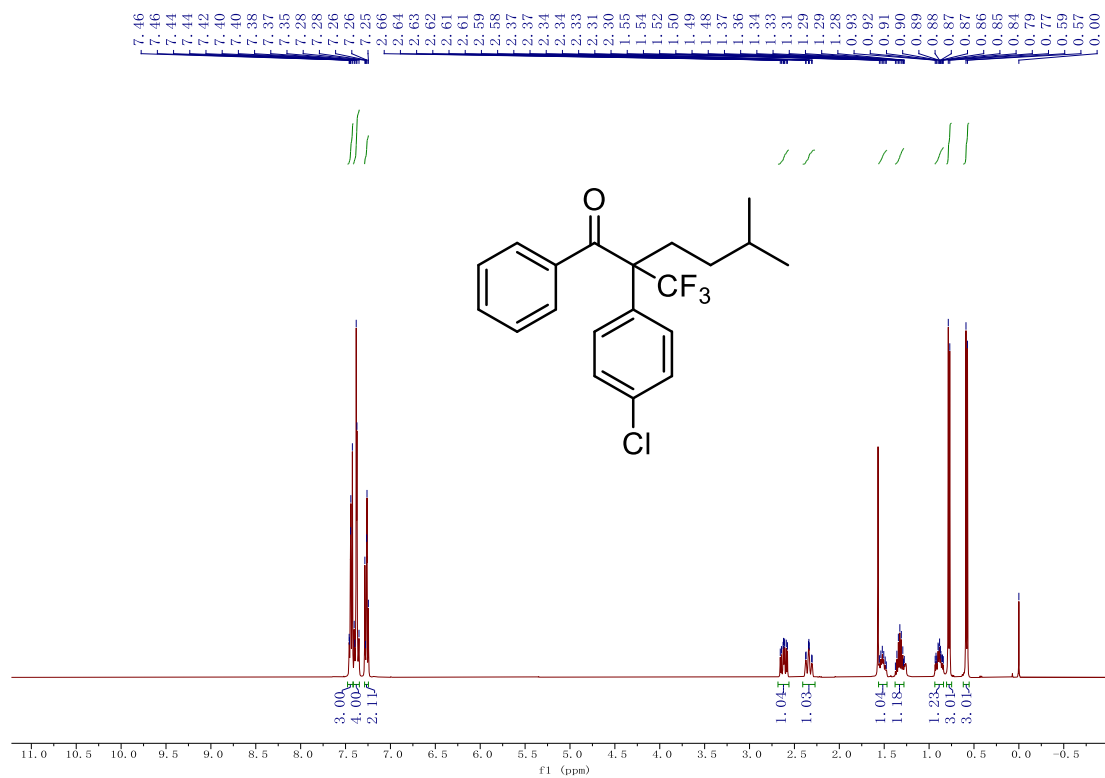

$^{13}\text{C}\{^1\text{H}\}$  NMR-spectrum (101MHz,  $\text{CDCl}_3$ ) of **5d**

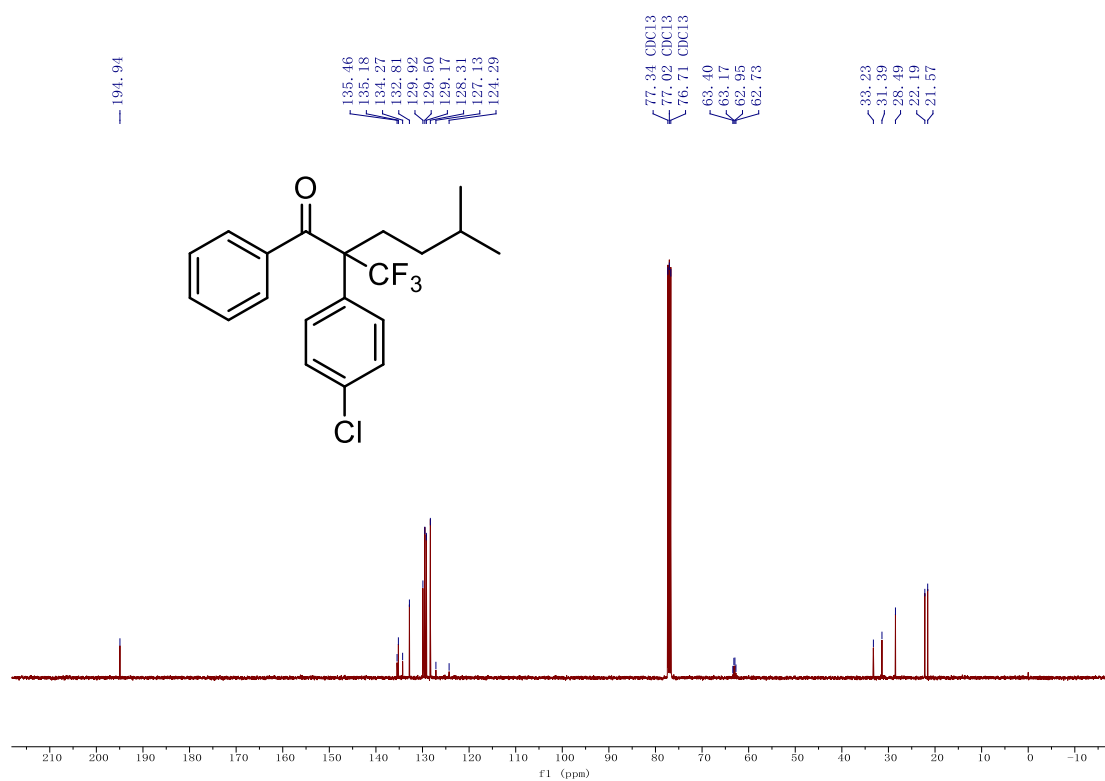

$^{19}\text{F}$  NMR-spectrum (376 MHz,  $\text{CDCl}_3$ ) of **5d**

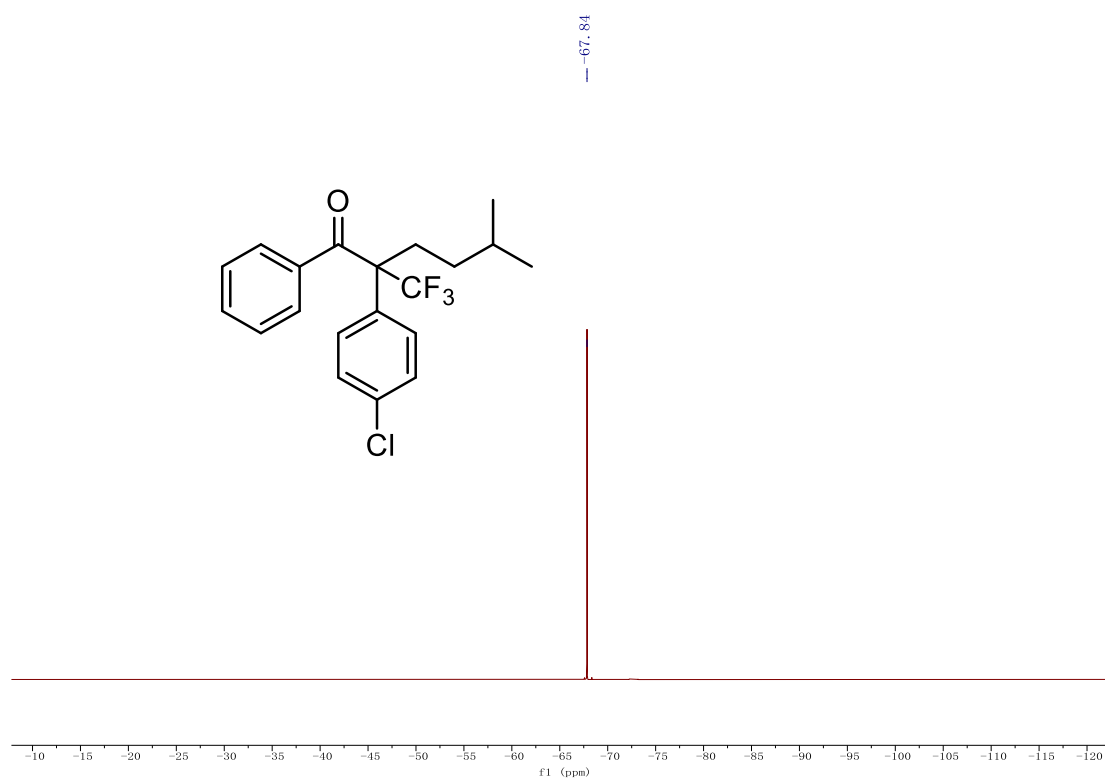

<sup>1</sup>H NMR-spectrum (400MHz, CDCl<sub>3</sub>) of **5e**

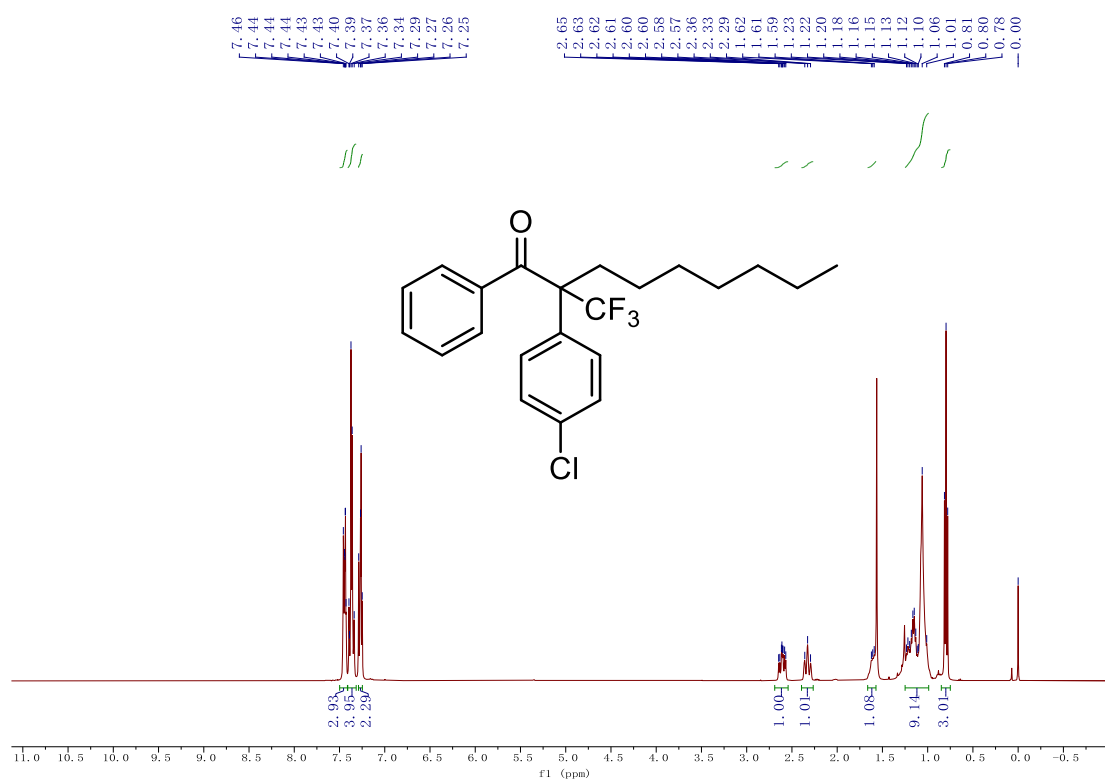

<sup>13</sup>C{<sup>1</sup>H} NMR -spectrum (101MHz, CDCl<sub>3</sub>) of **5e**

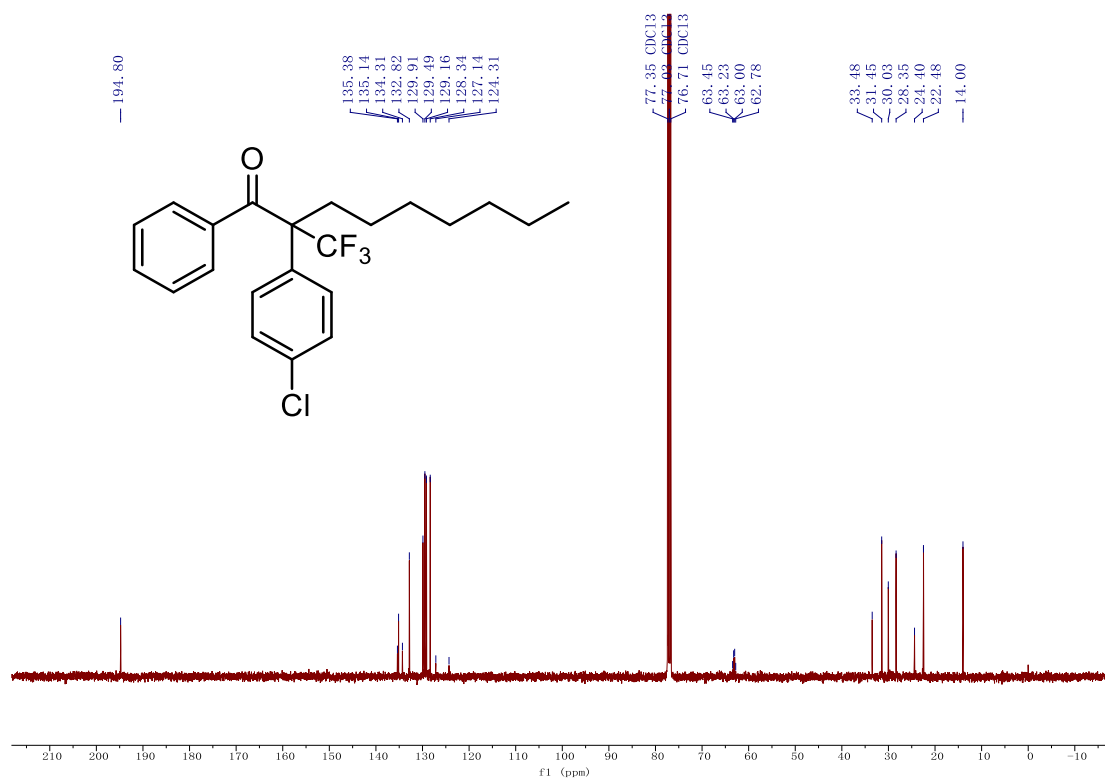

<sup>19</sup>F NMR-spectrum (376 MHz, CDCl<sub>3</sub>) of **5e**

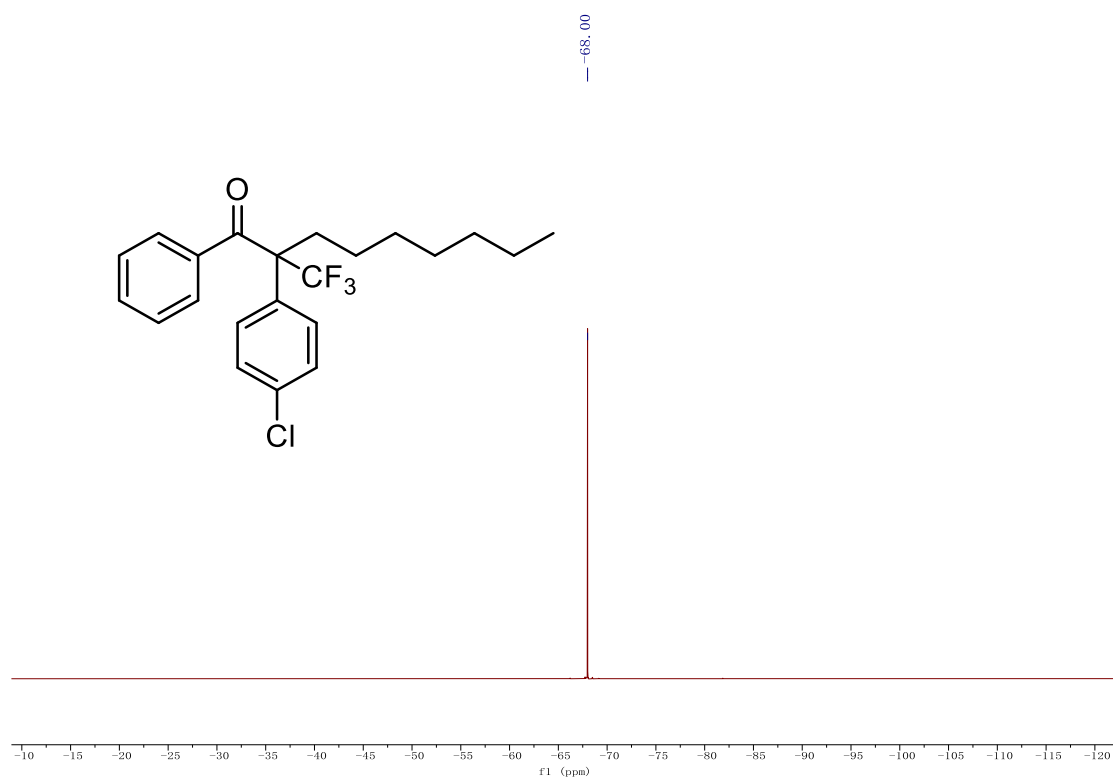

<sup>1</sup>H NMR-spectrum (400MHz, CDCl<sub>3</sub>) of **5f**

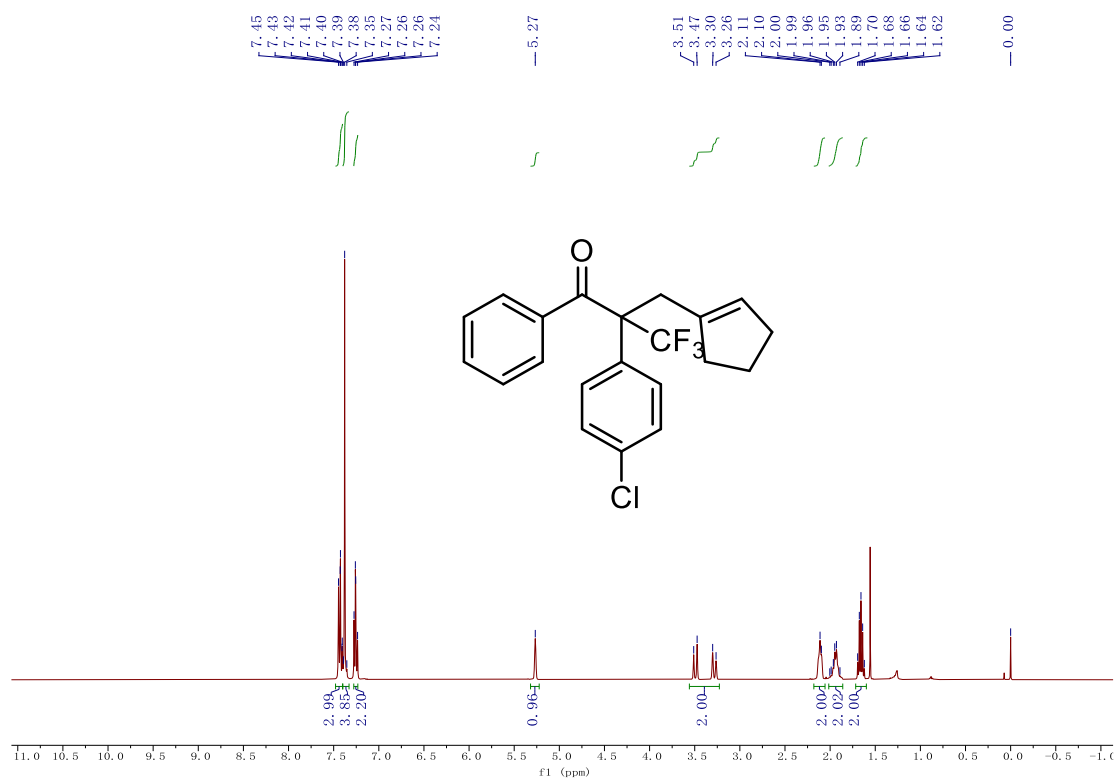

$^{13}\text{C}\{^1\text{H}\}$  NMR-spectrum (101MHz,  $\text{CDCl}_3$ ) of **5f**

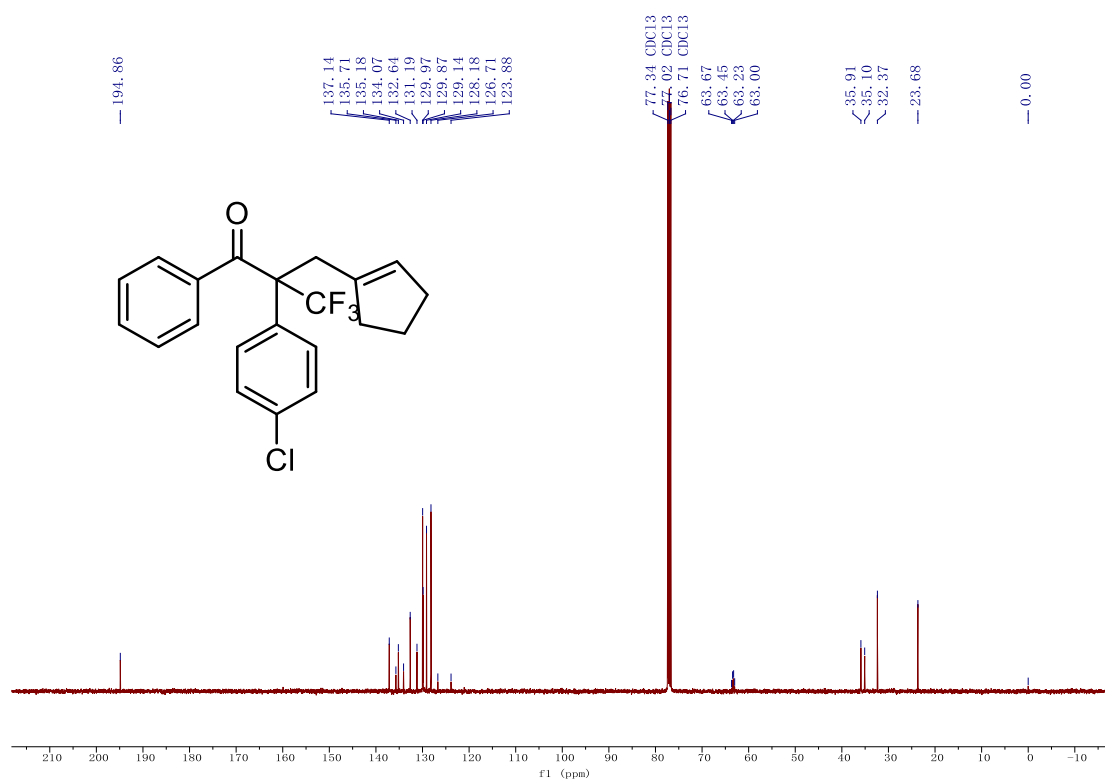

$^{19}\text{F}$  NMR-spectrum (376 MHz,  $\text{CDCl}_3$ ) of **5f**

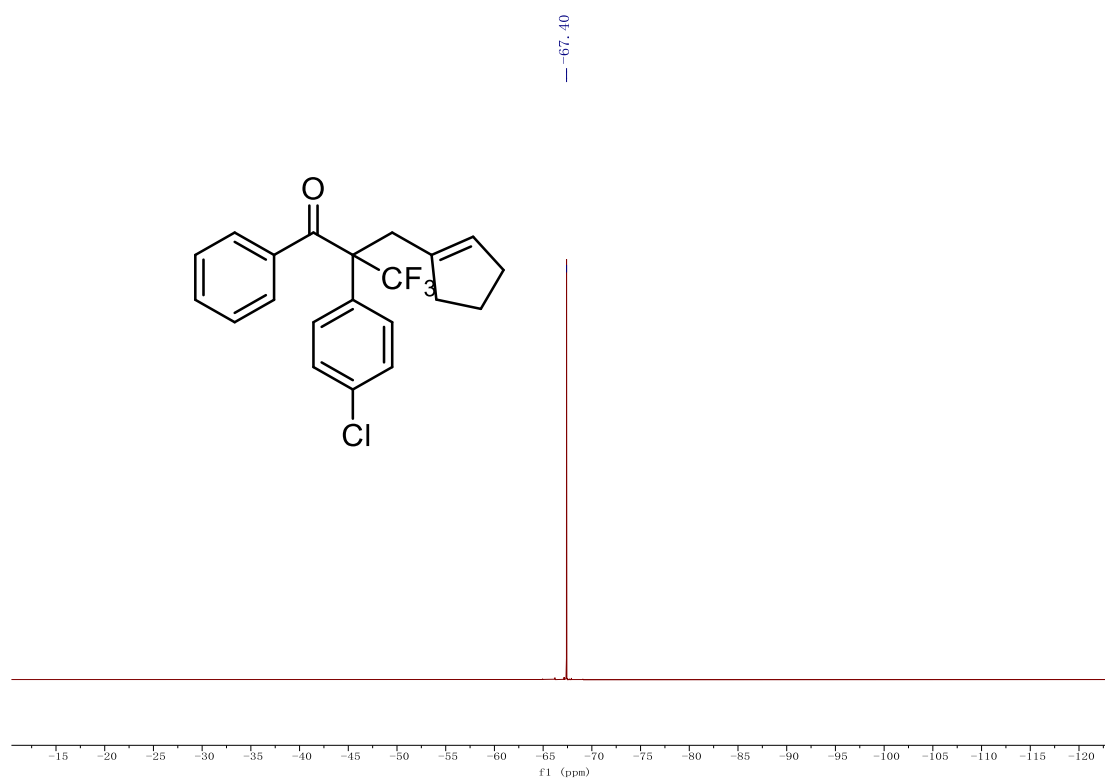

<sup>1</sup>H NMR-spectrum (400MHz, CDCl<sub>3</sub>) of **5g**

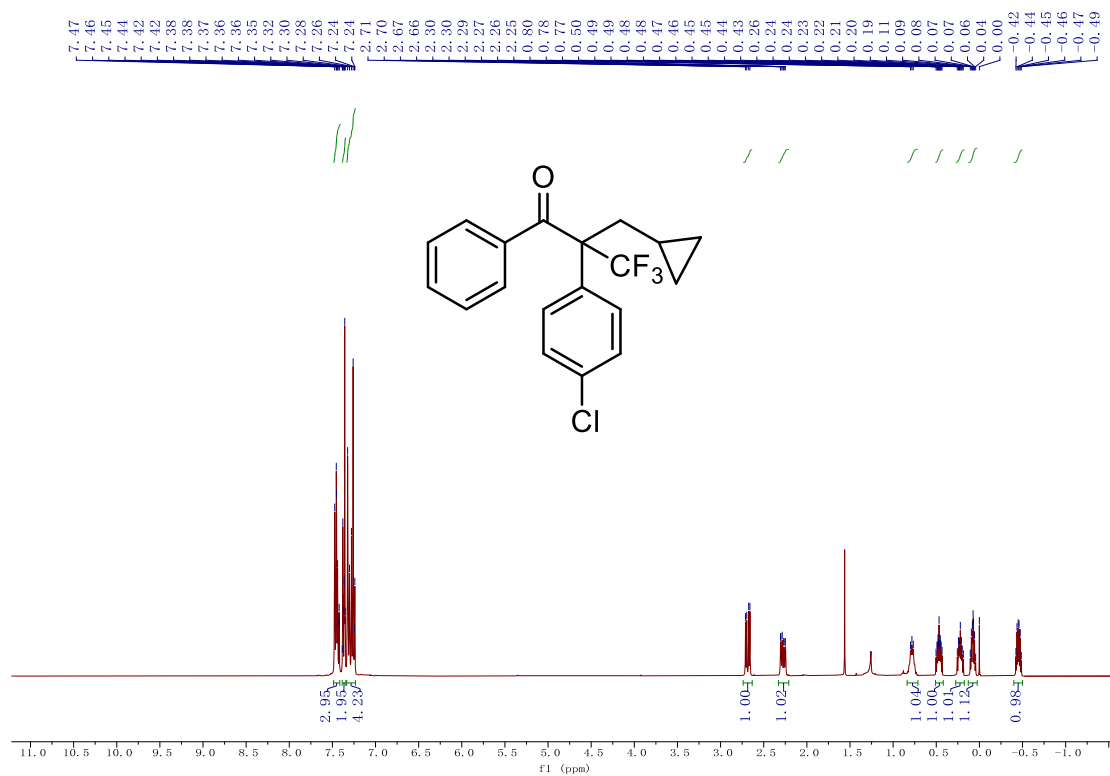

<sup>13</sup>C{<sup>1</sup>H} NMR-spectrum (101MHz, CDCl<sub>3</sub>) of **5g**

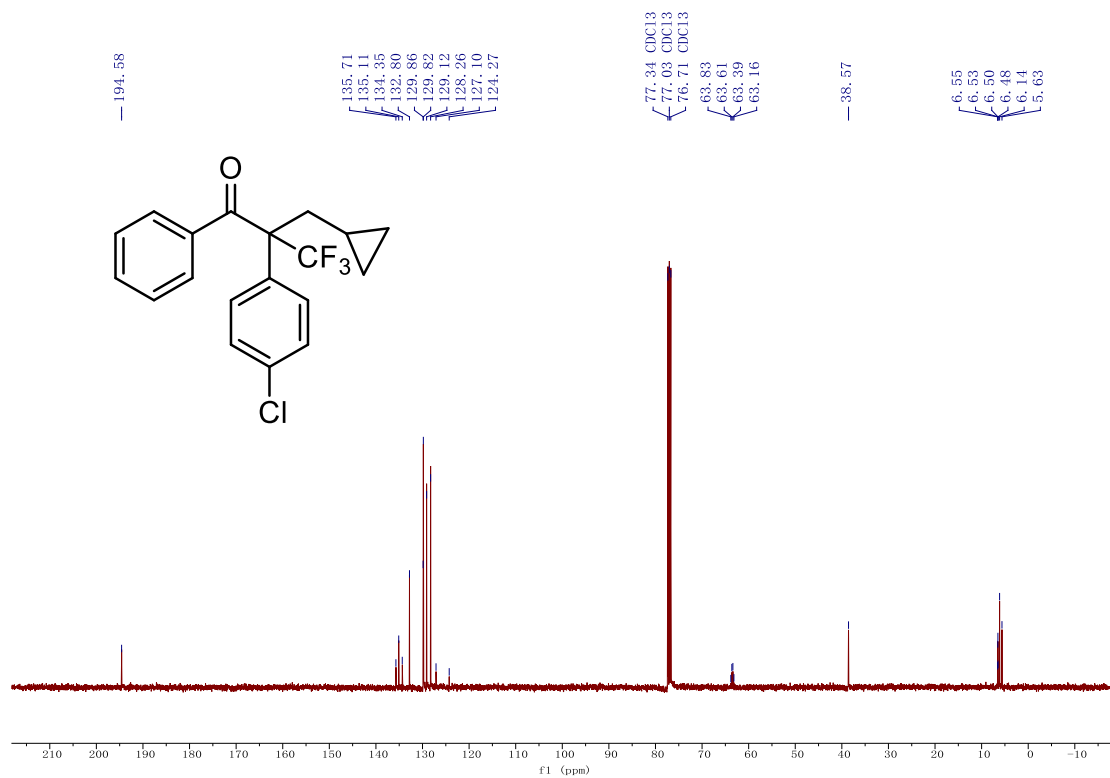

<sup>19</sup>F NMR-spectrum (376 MHz, CDCl<sub>3</sub>) of **5g**

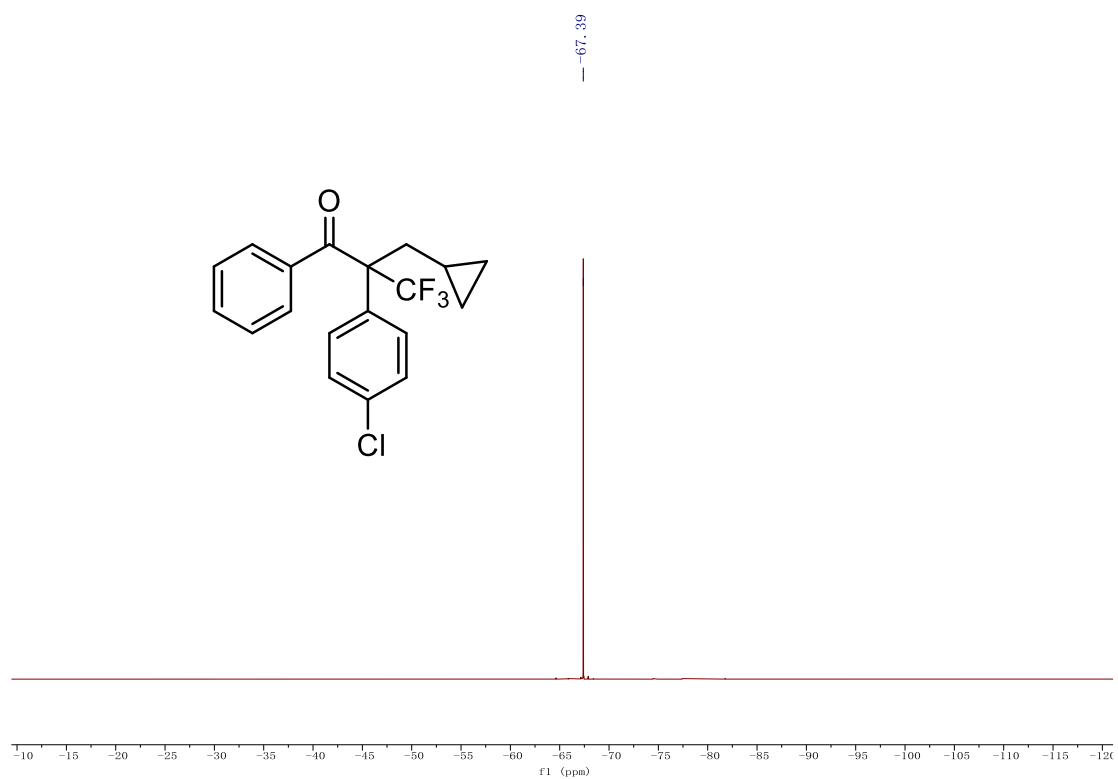

<sup>1</sup>H NMR-spectrum (400MHz, CDCl<sub>3</sub>) of **5h**

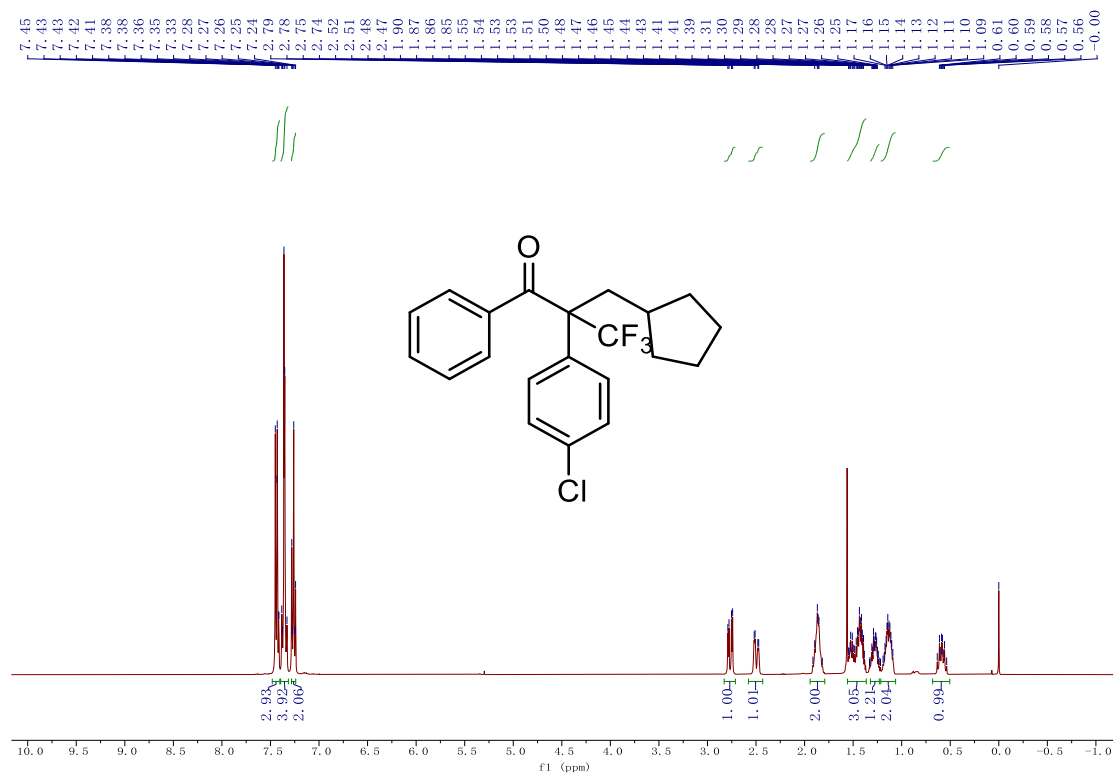

$^{13}\text{C}\{^1\text{H}\}$  NMR-spectrum (101MHz,  $\text{CDCl}_3$ ) of **5h**

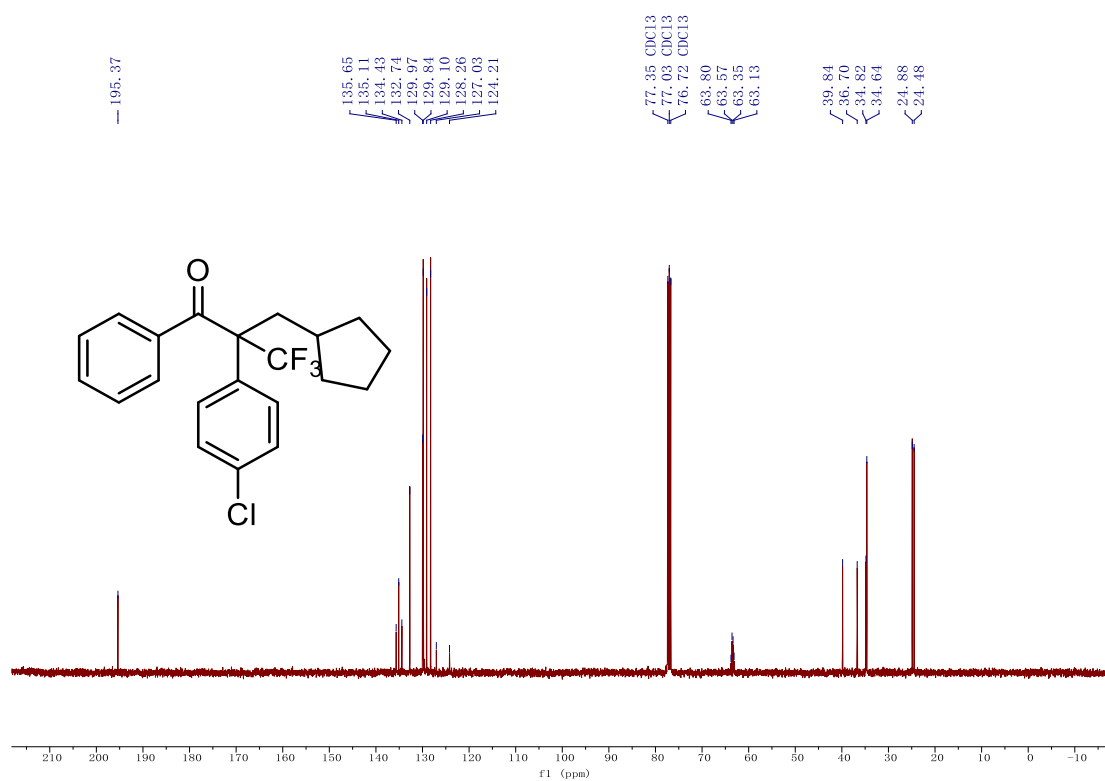

$^{19}\text{F}$  NMR-spectrum (376 MHz,  $\text{CDCl}_3$ ) of **5h**

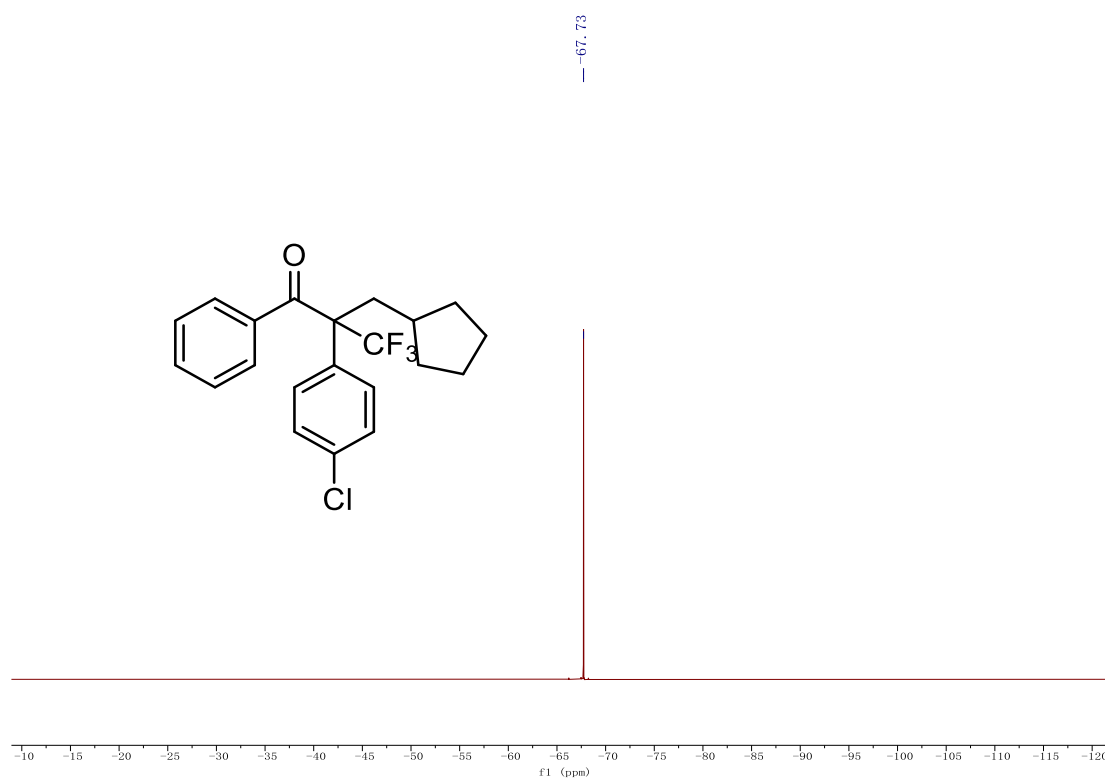

$^1\text{H}$  NMR-spectrum (400MHz,  $\text{CDCl}_3$ ) of **5i**

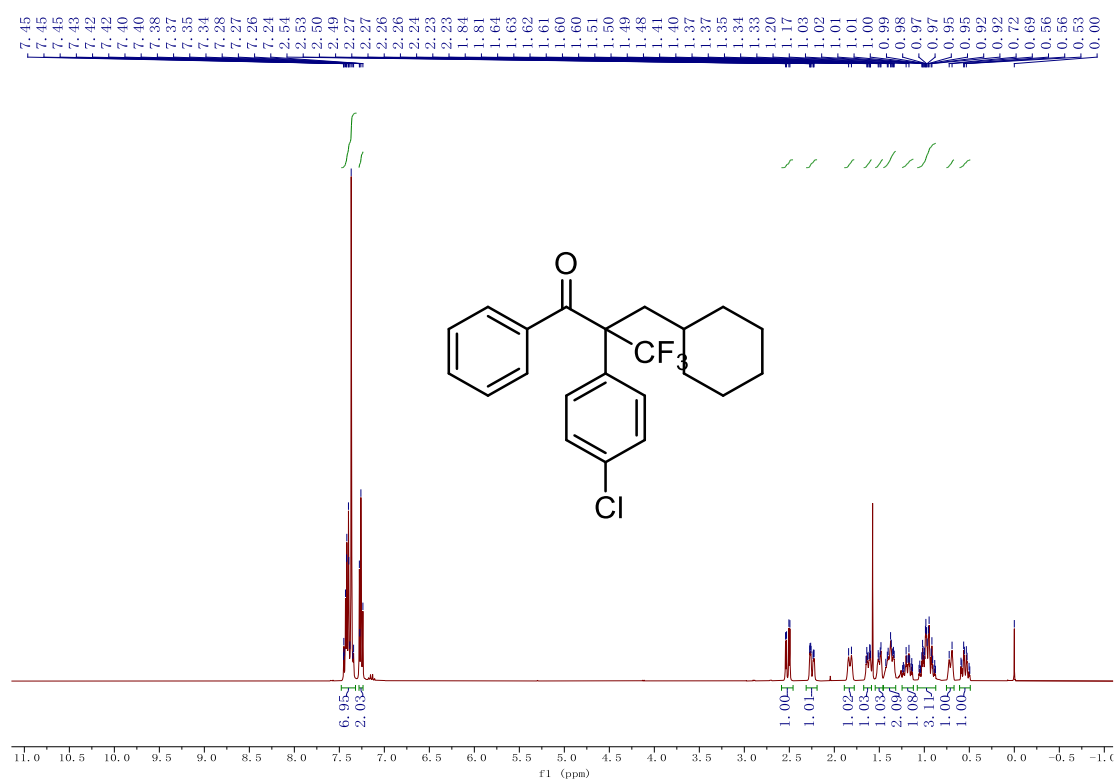

$^{13}\text{C}\{^1\text{H}\}$  NMR-spectrum (101MHz,  $\text{CDCl}_3$ ) of **5i**

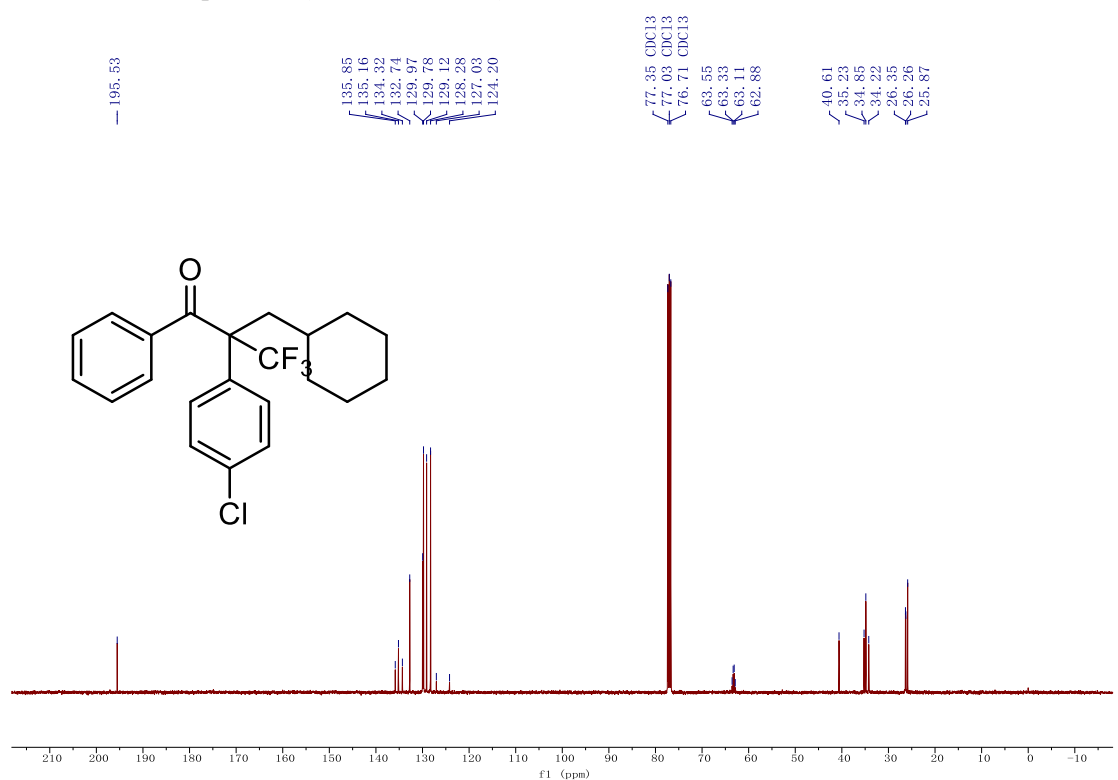

**<sup>19</sup>F NMR-spectrum (376 MHz, CDCl<sub>3</sub>) of 5i**

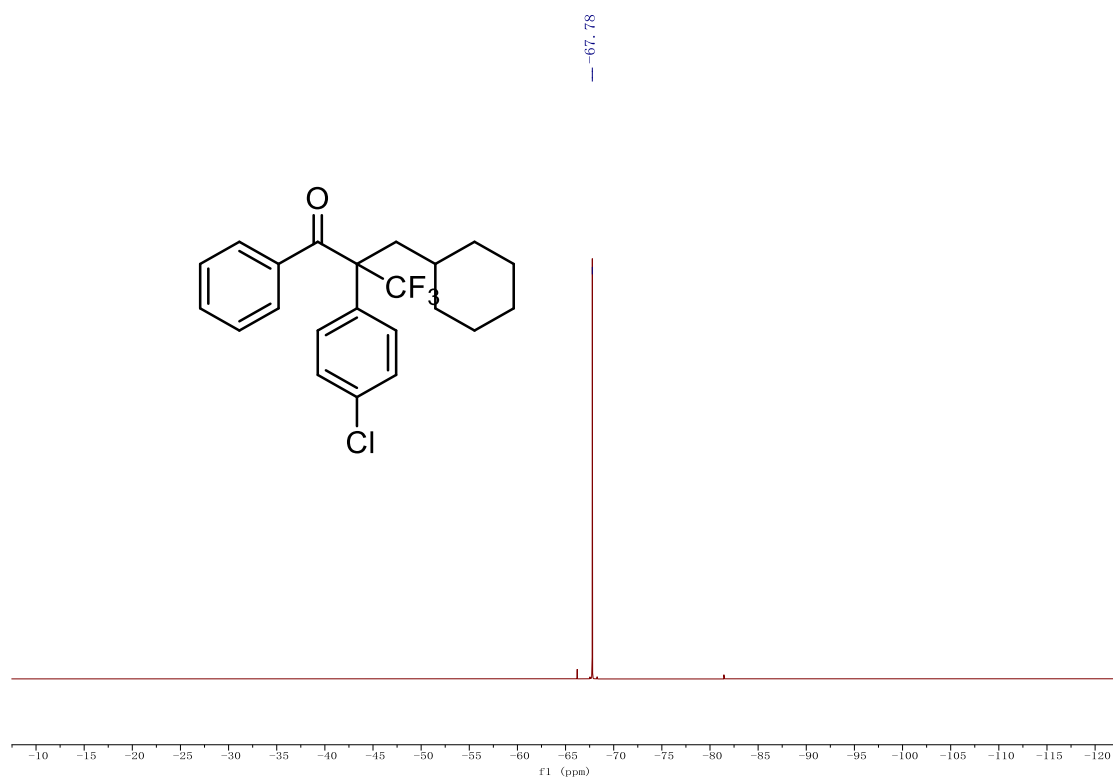

**<sup>1</sup>H NMR-spectrum (400MHz, CDCl<sub>3</sub>) of 5j**

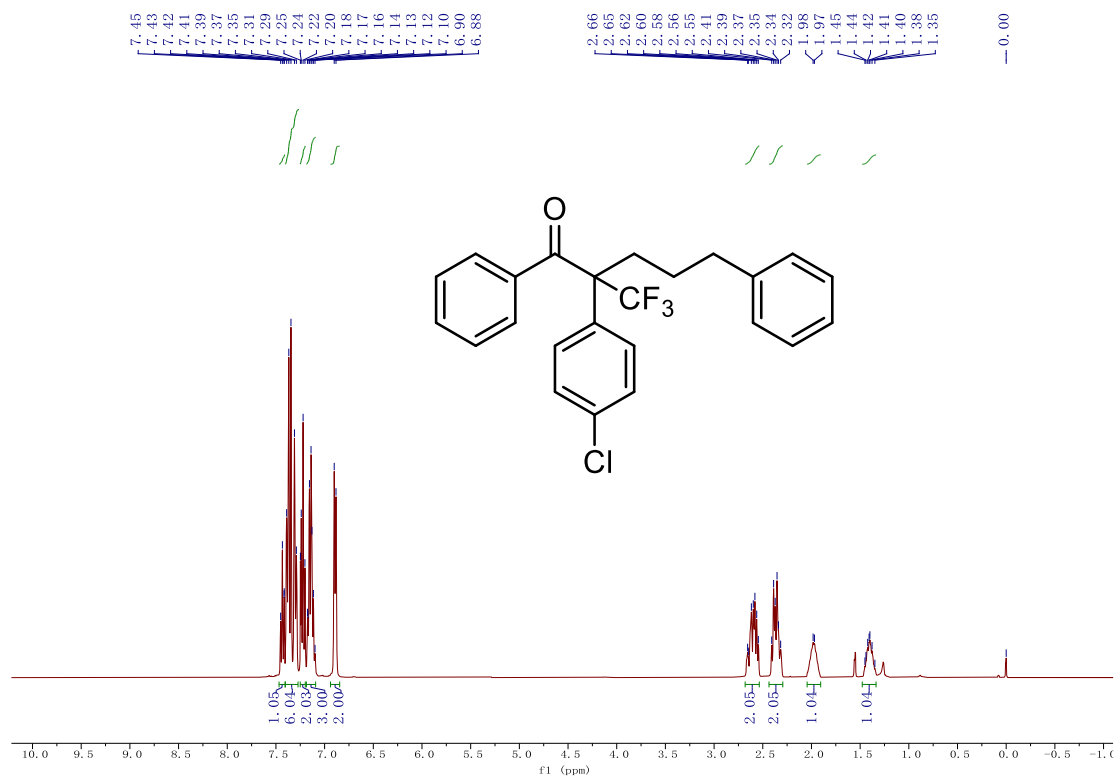

$^{13}\text{C}\{^1\text{H}\}$  NMR-spectrum (101MHz,  $\text{CDCl}_3$ ) of **5j**

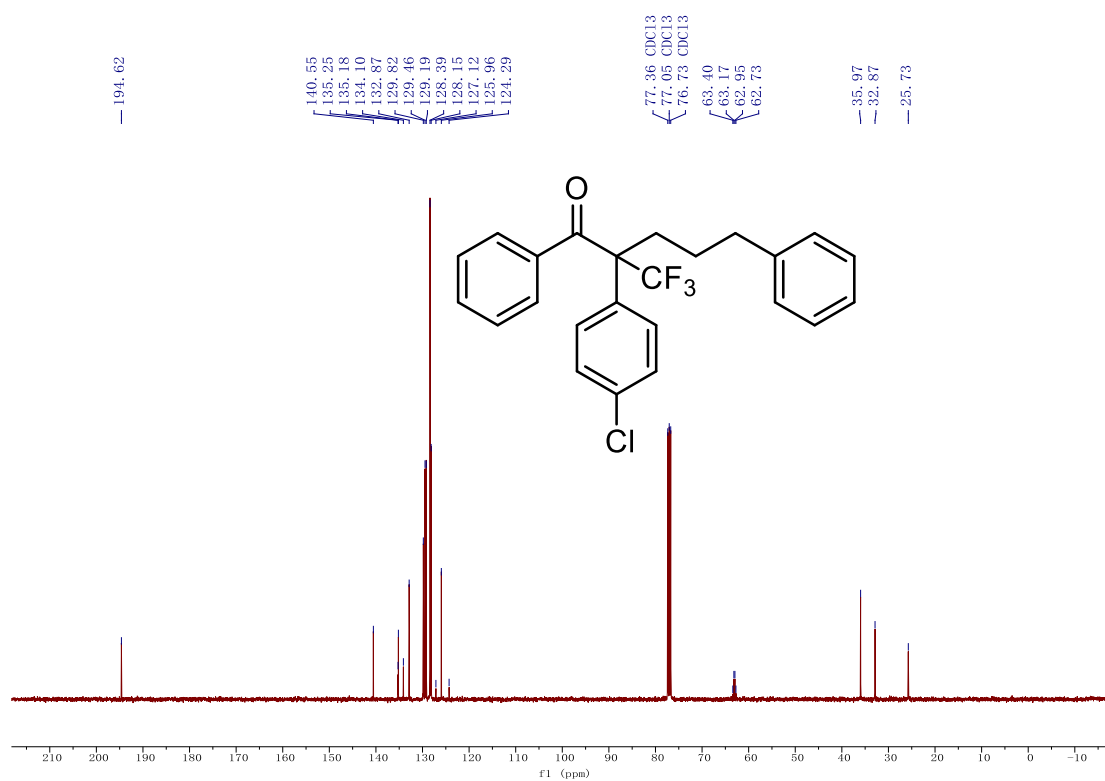

$^{19}\text{F}$  NMR-spectrum (376 MHz,  $\text{CDCl}_3$ ) of **5j**

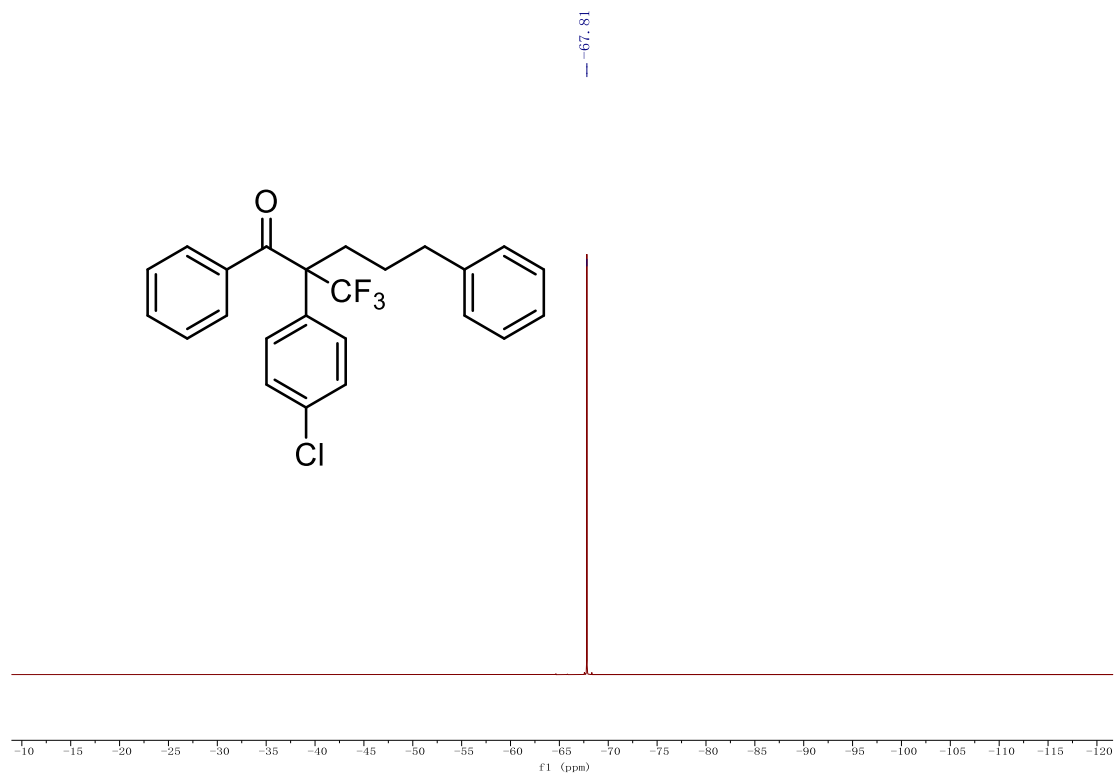

<sup>1</sup>H NMR-spectrum (400MHz, CDCl<sub>3</sub>) of **5k**

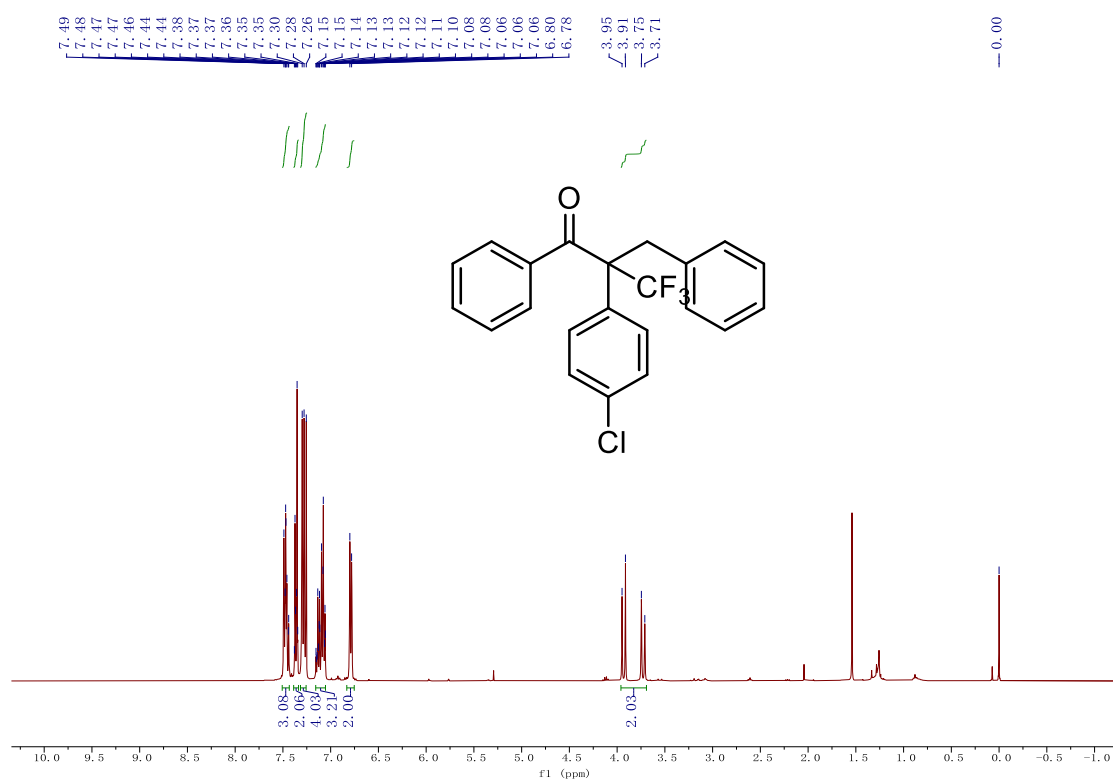

<sup>13</sup>C{<sup>1</sup>H} NMR -spectrum (101MHz, CDCl<sub>3</sub>) of **5k**

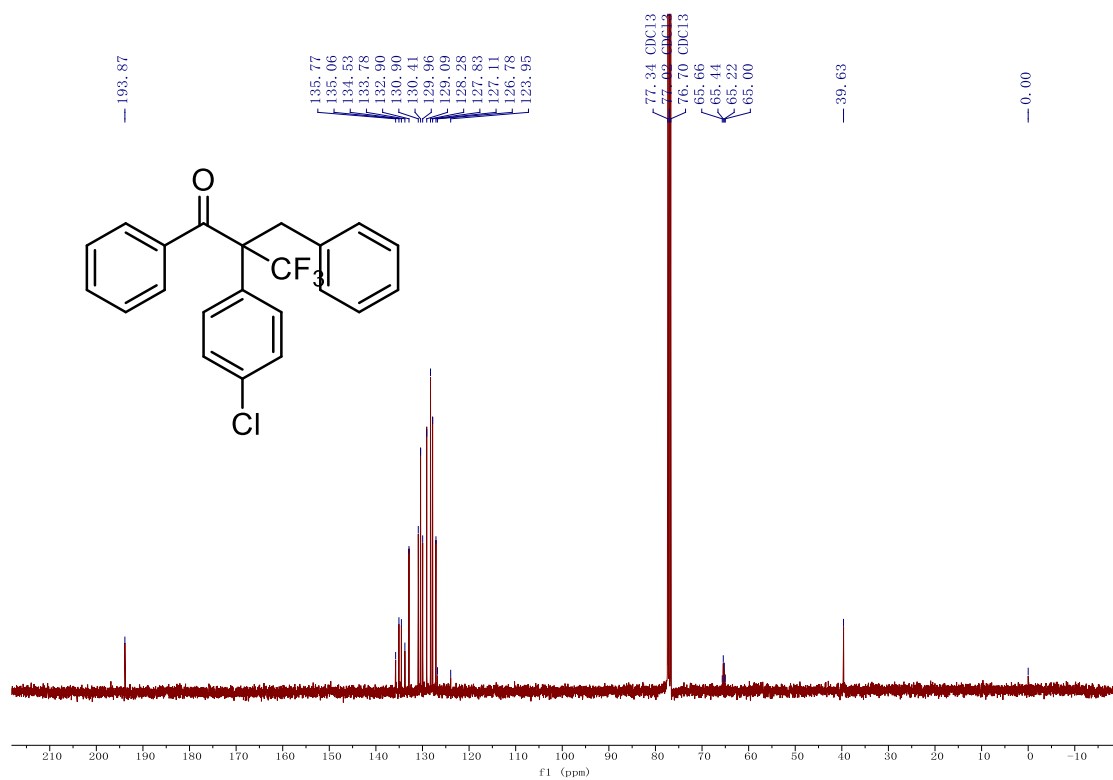

<sup>19</sup>F NMR-spectrum (376 MHz, CDCl<sub>3</sub>) of **5k**

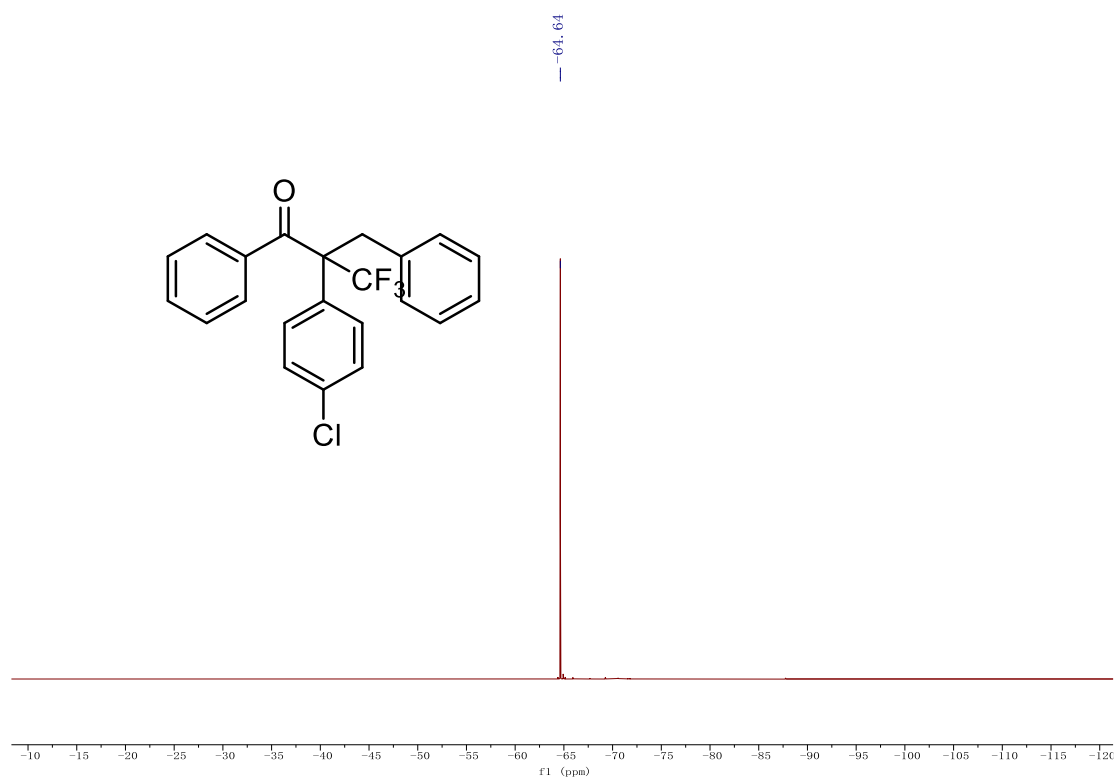

<sup>1</sup>H NMR-spectrum (400MHz, CDCl<sub>3</sub>) of **5l**

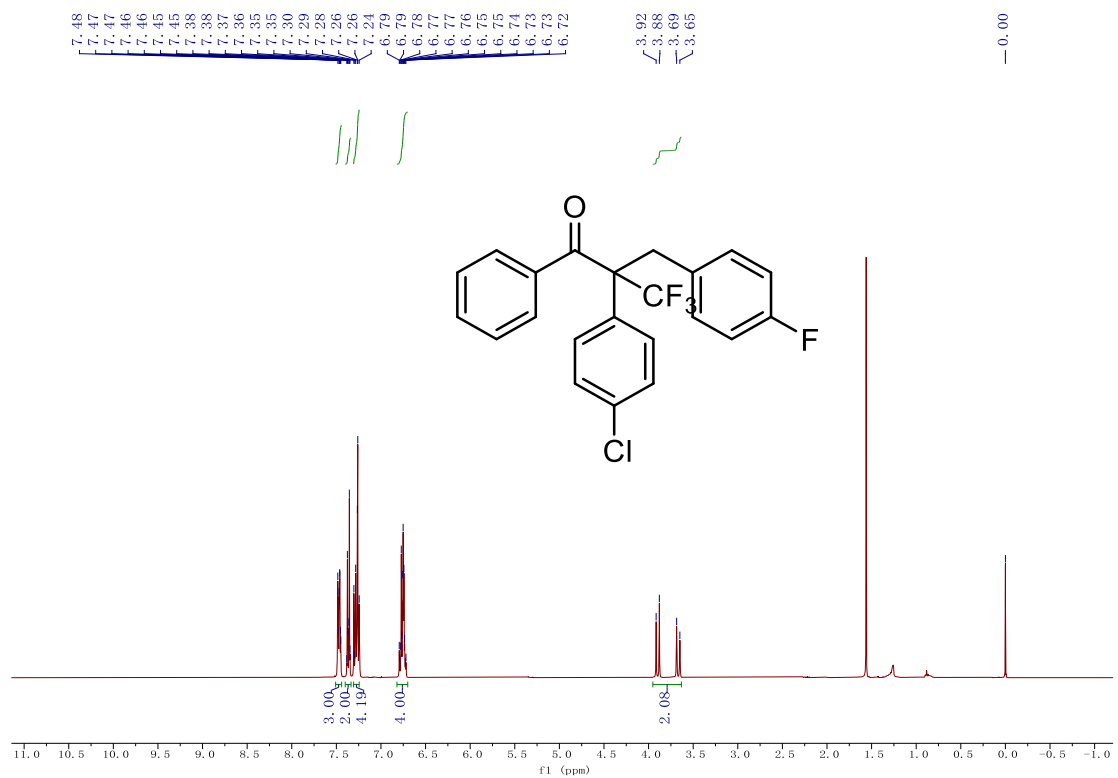

$^{13}\text{C}\{^1\text{H}\}$  NMR -spectrum (101MHz,  $\text{CDCl}_3$ ) of **51**

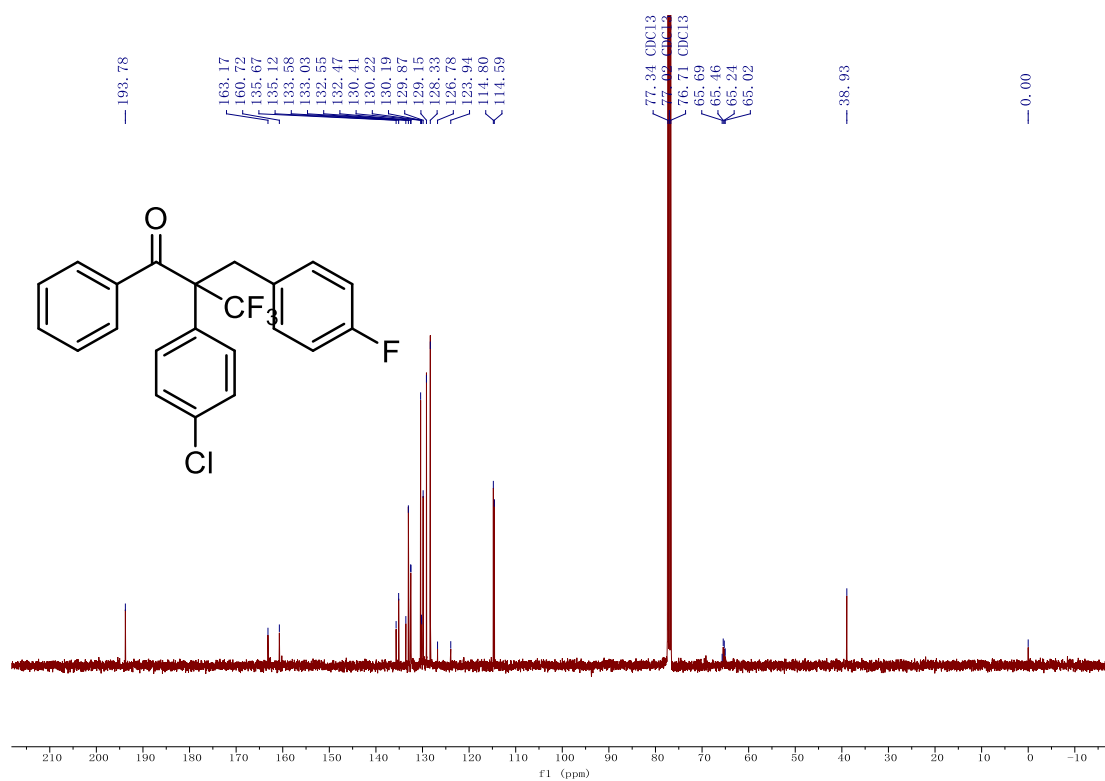

$^{19}\text{F}$  NMR-spectrum (376 MHz,  $\text{CDCl}_3$ ) of **51**

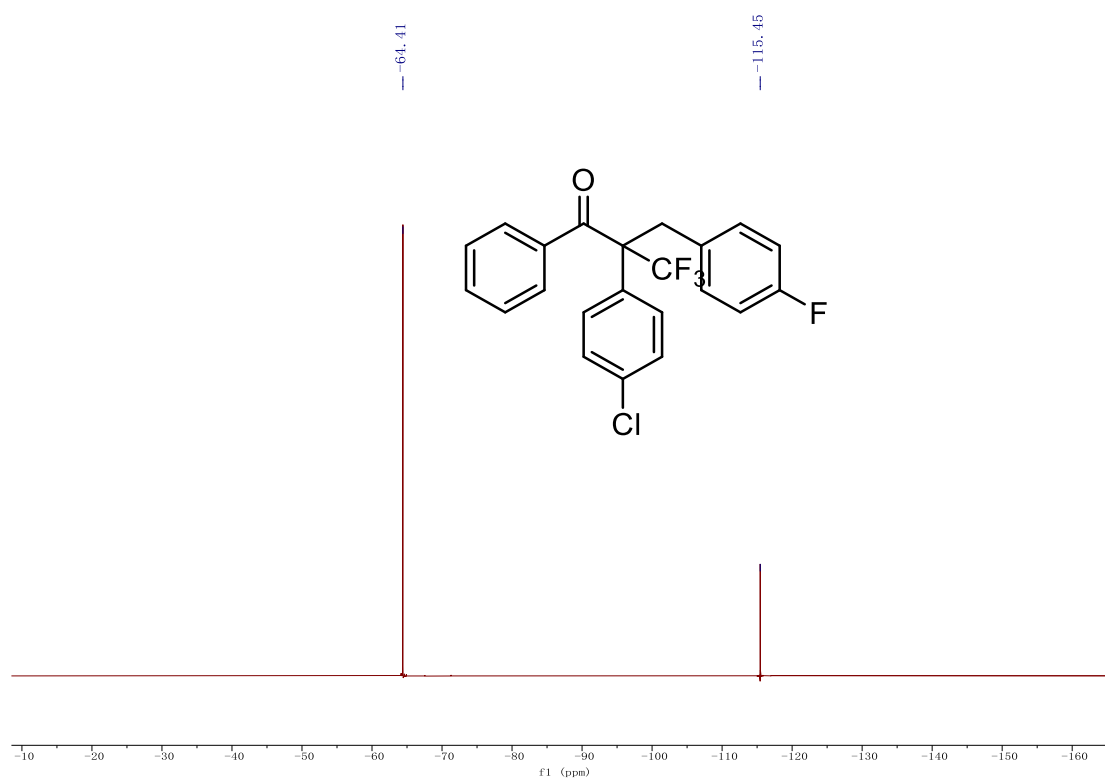

<sup>1</sup>H NMR-spectrum (400MHz, CDCl<sub>3</sub>) of **5m**

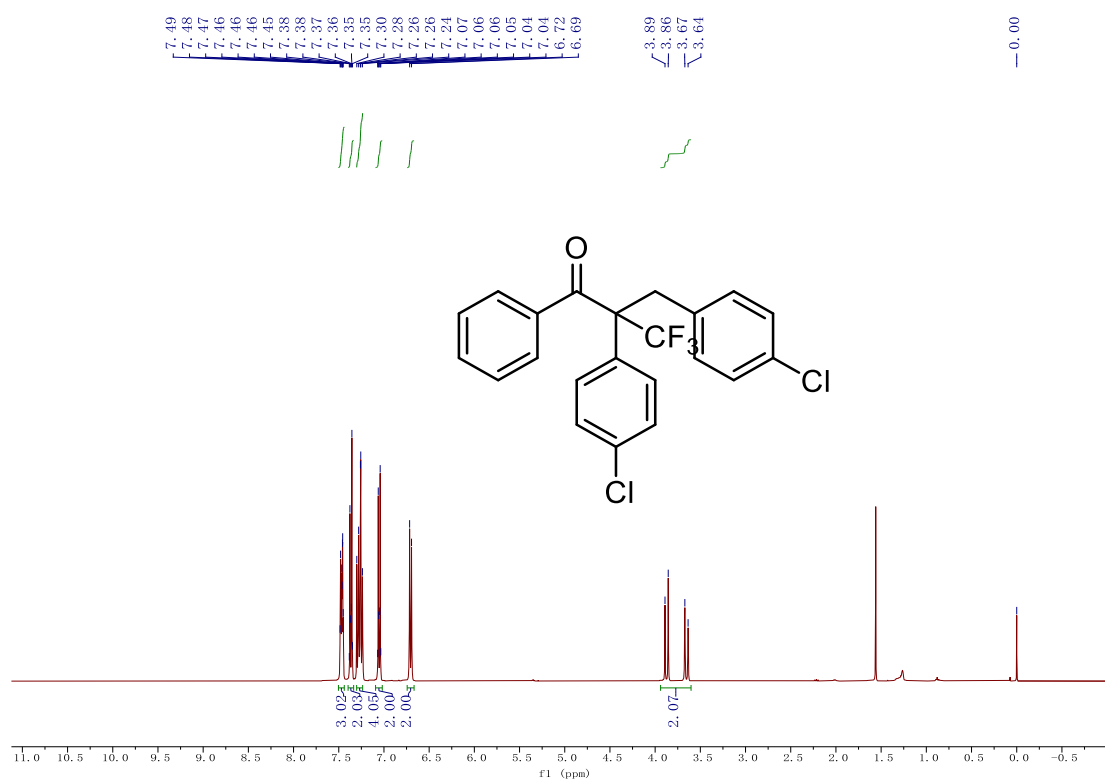

<sup>13</sup>C{<sup>1</sup>H} NMR -spectrum (101MHz, CDCl<sub>3</sub>) of **5m**

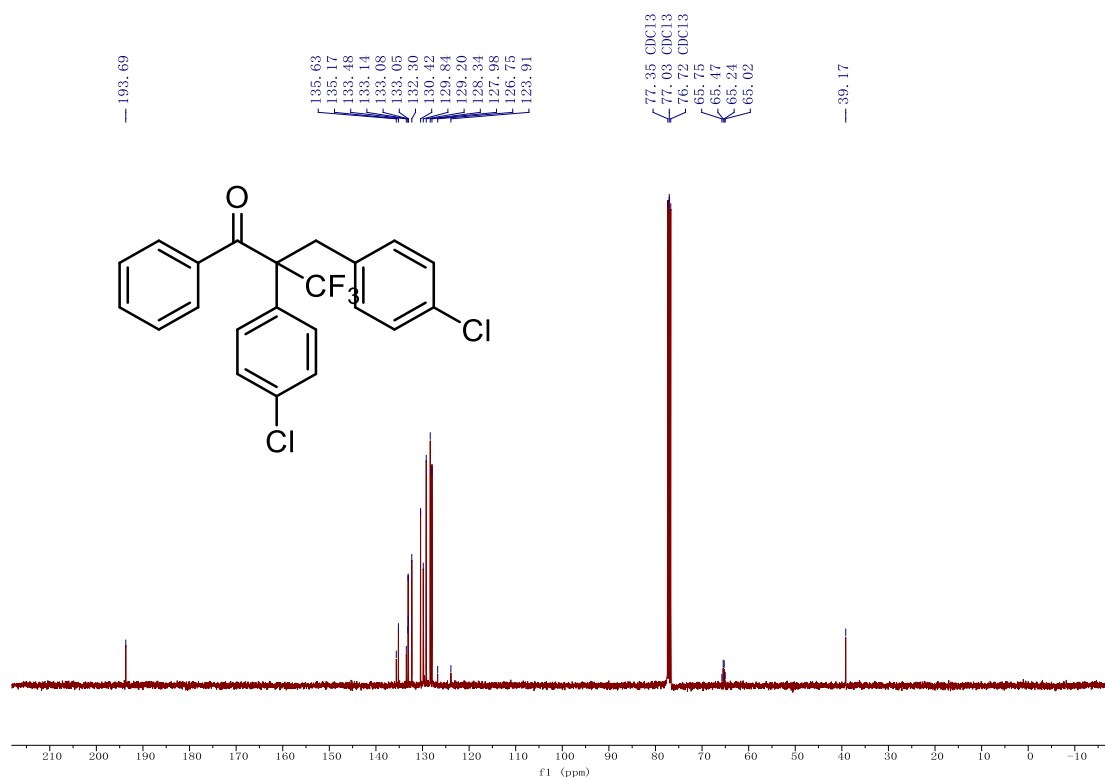

<sup>19</sup>F NMR-spectrum (376 MHz, CDCl<sub>3</sub>) of **5m**

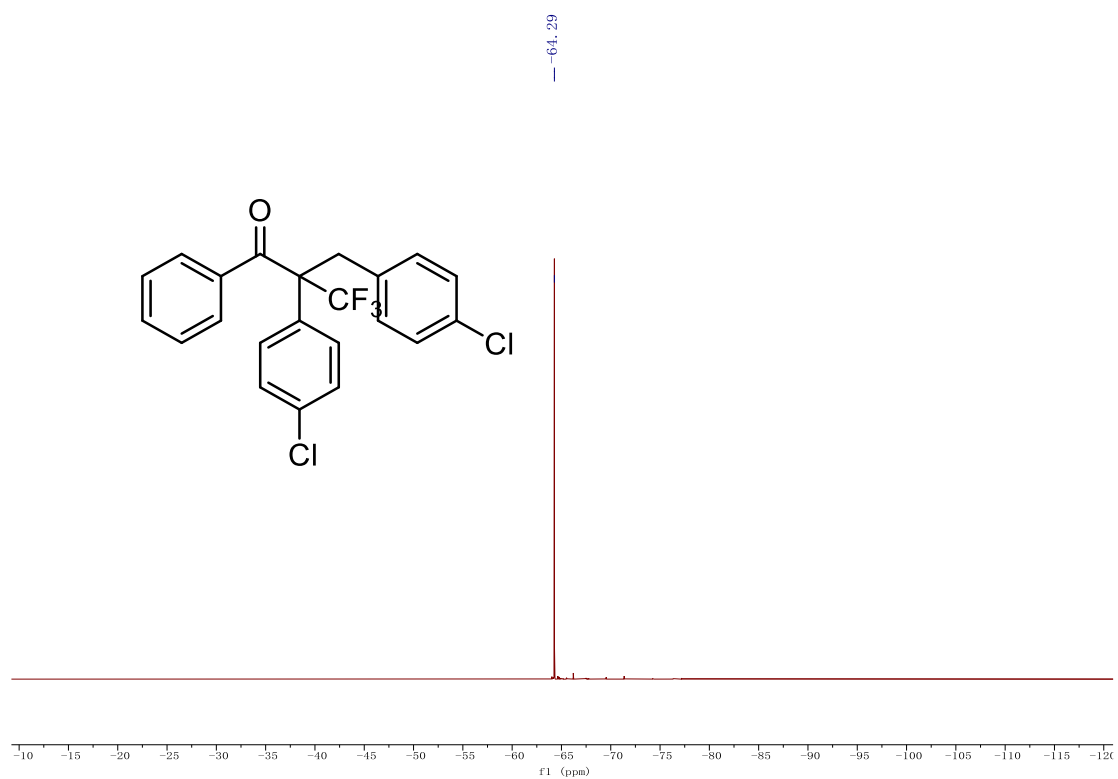

<sup>1</sup>H NMR-spectrum (400MHz, CDCl<sub>3</sub>) of **5n**

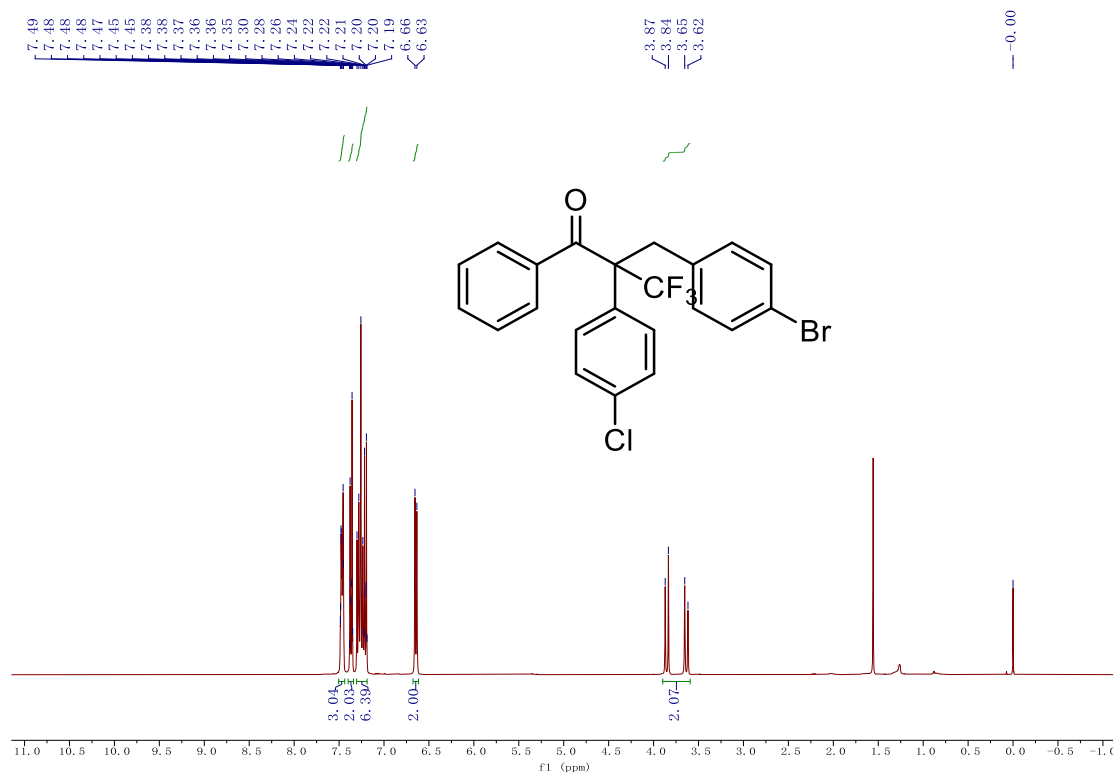

$^{13}\text{C}\{^1\text{H}\}$  NMR-spectrum (101MHz,  $\text{CDCl}_3$ ) of **5n**

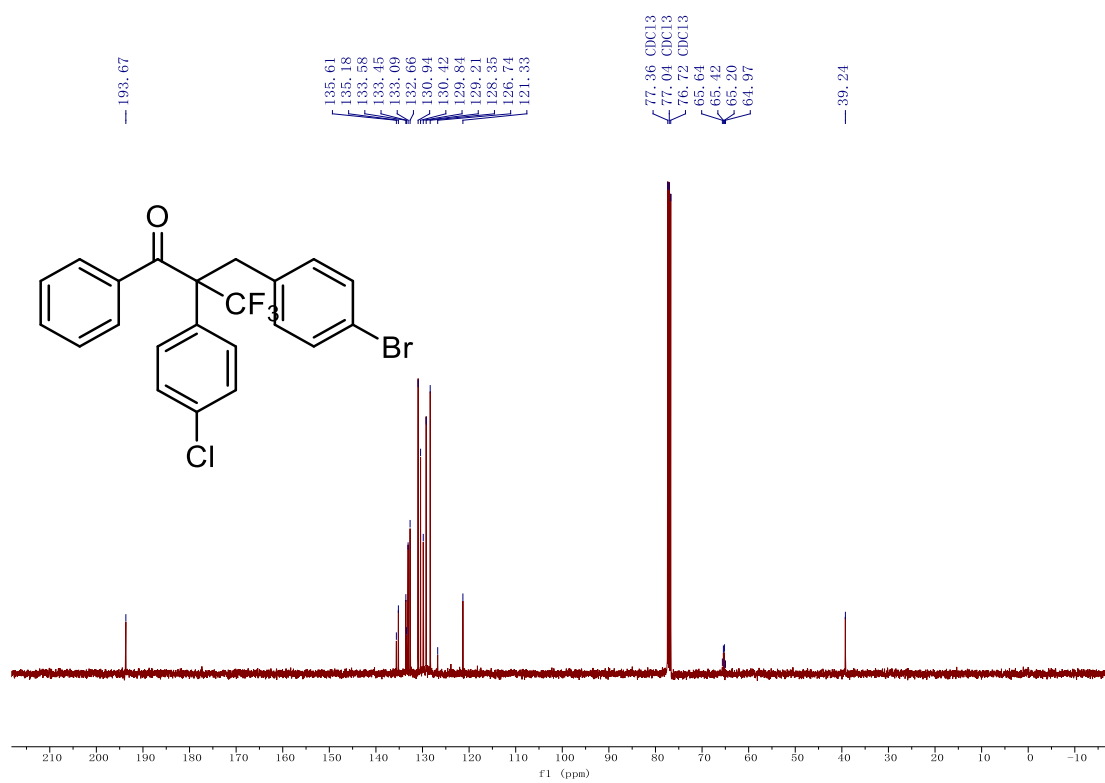

$^{19}\text{F}$  NMR-spectrum (376 MHz,  $\text{CDCl}_3$ ) of **5n**

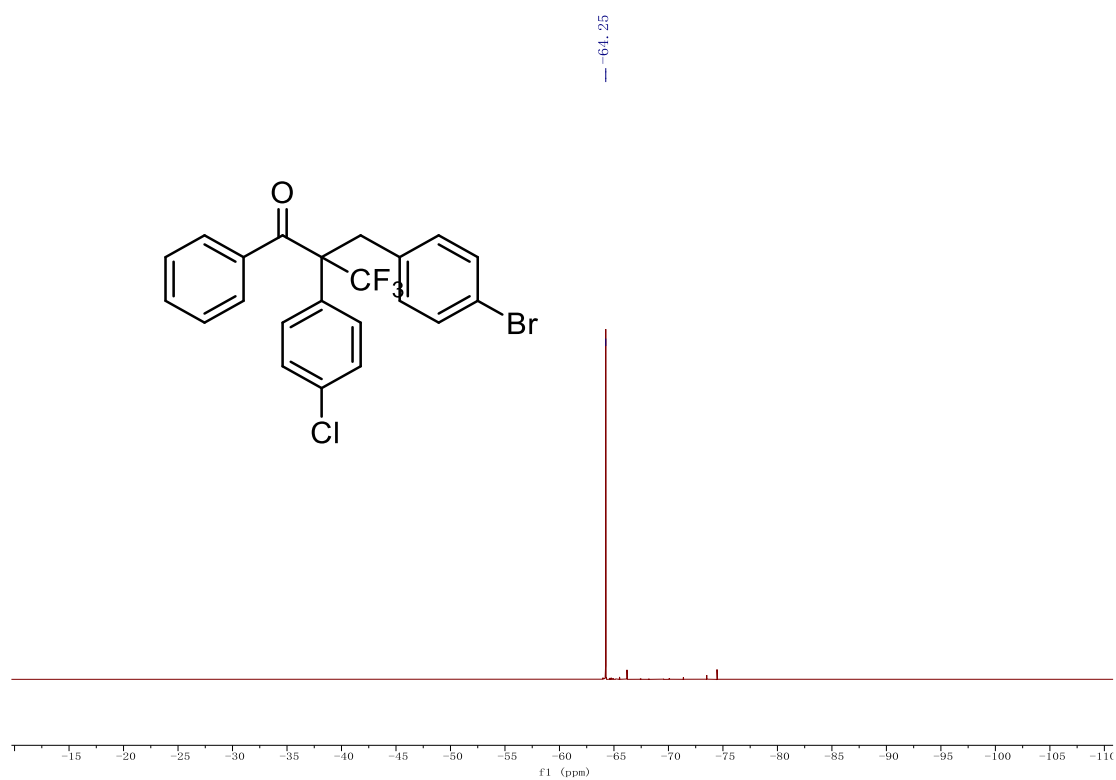

<sup>1</sup>H NMR-spectrum (400MHz, CDCl<sub>3</sub>) of **5o**

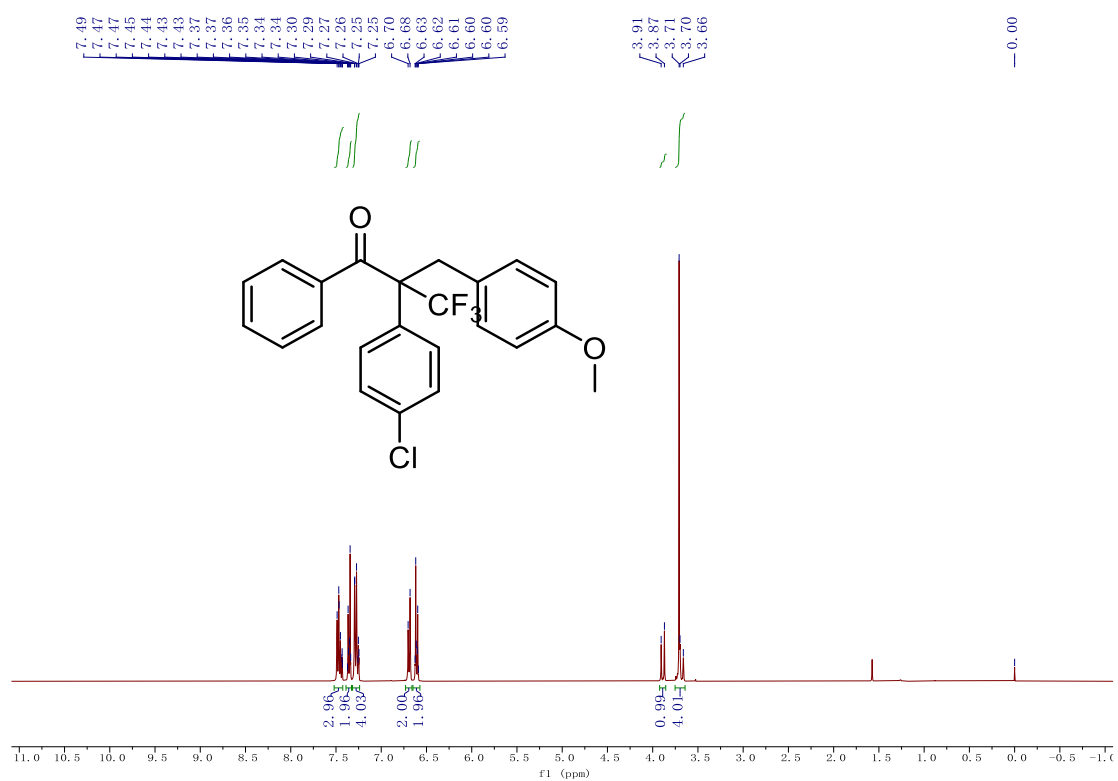

<sup>13</sup>C{<sup>1</sup>H} NMR -spectrum (101MHz, CDCl<sub>3</sub>) of **5o**

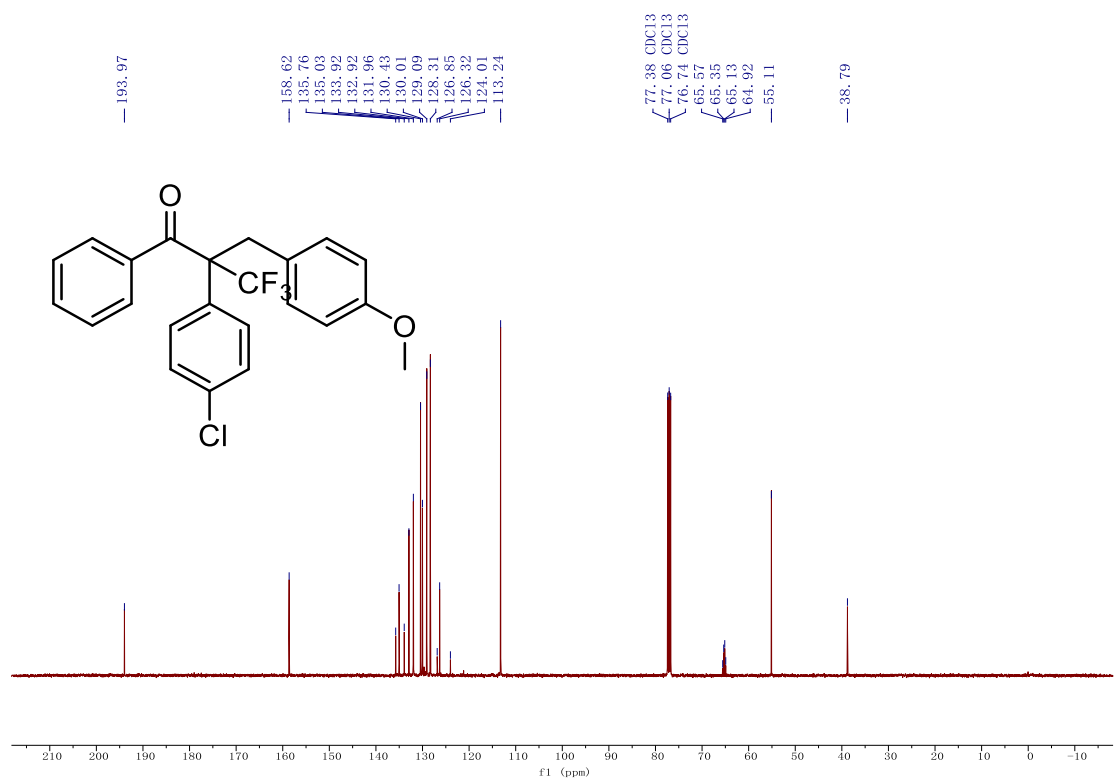

<sup>19</sup>F NMR-spectrum (376 MHz, CDCl<sub>3</sub>) of **5o**

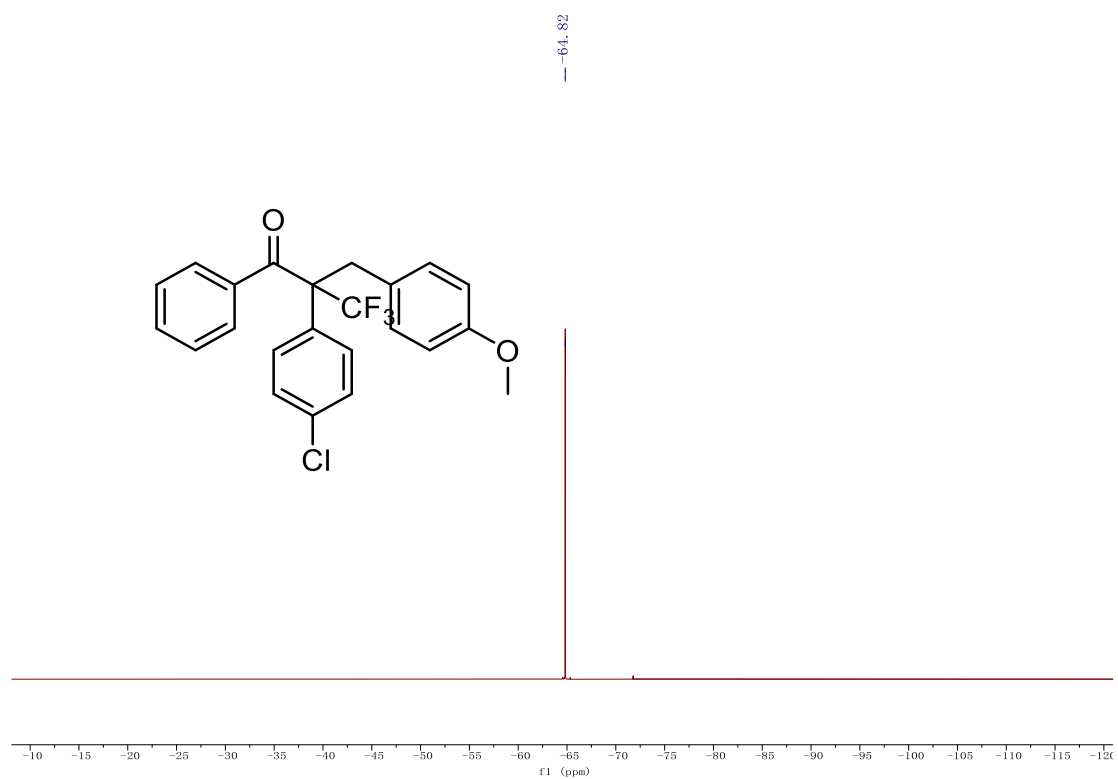

<sup>1</sup>H NMR-spectrum (400MHz, CDCl<sub>3</sub>) of **5p**

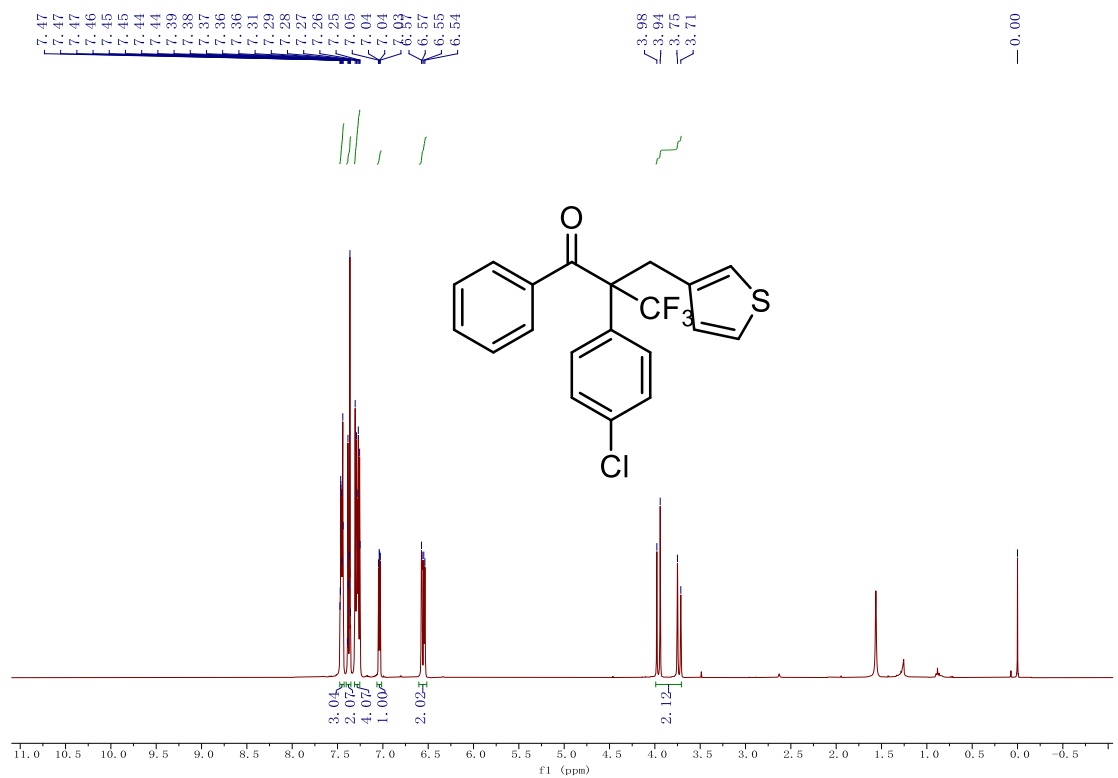

$^{13}\text{C}\{^1\text{H}\}$  NMR-spectrum (101MHz,  $\text{CDCl}_3$ ) of **5p**

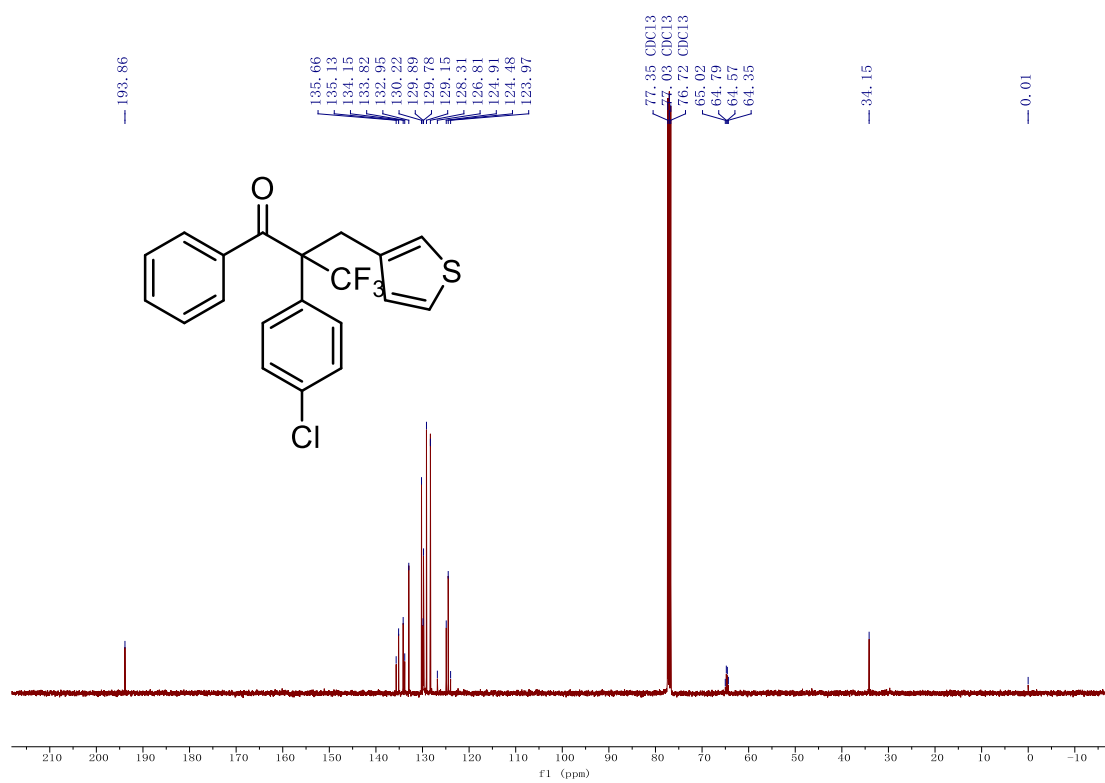

$^{19}\text{F}$  NMR-spectrum (376 MHz,  $\text{CDCl}_3$ ) of **5p**

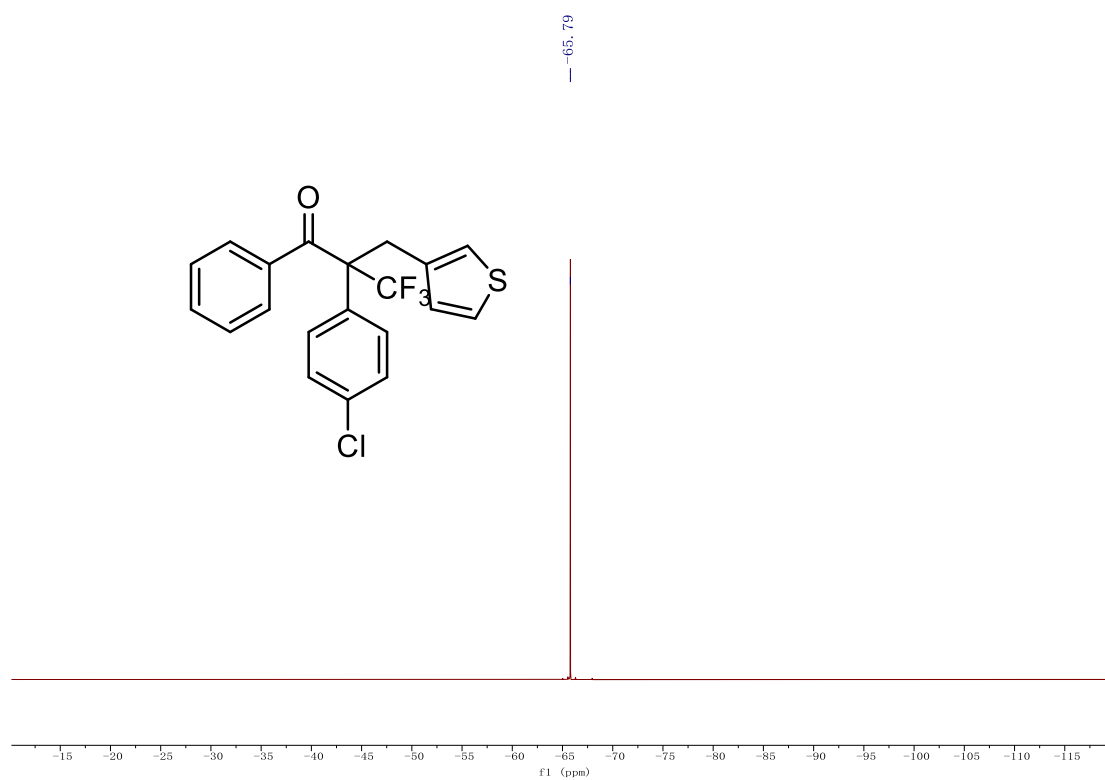

<sup>1</sup>H NMR-spectrum (400MHz, CDCl<sub>3</sub>) of **6a**

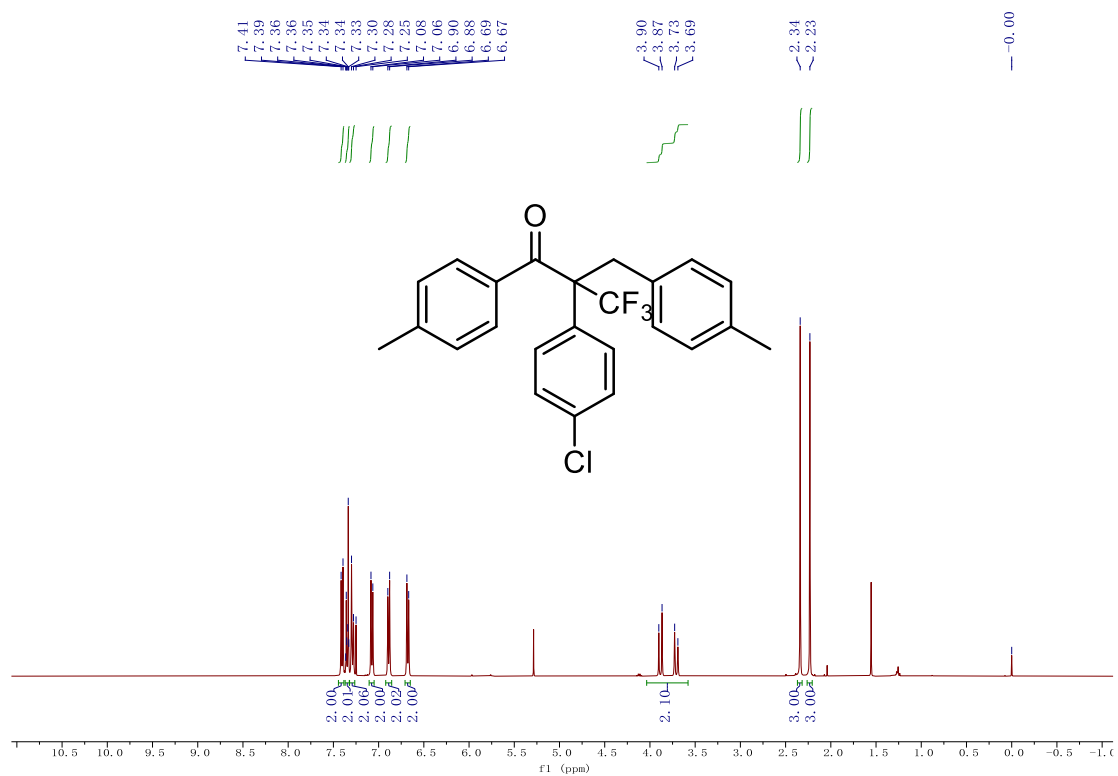

<sup>13</sup>C{<sup>1</sup>H} NMR-spectrum (101MHz, CDCl<sub>3</sub>) of **6a**

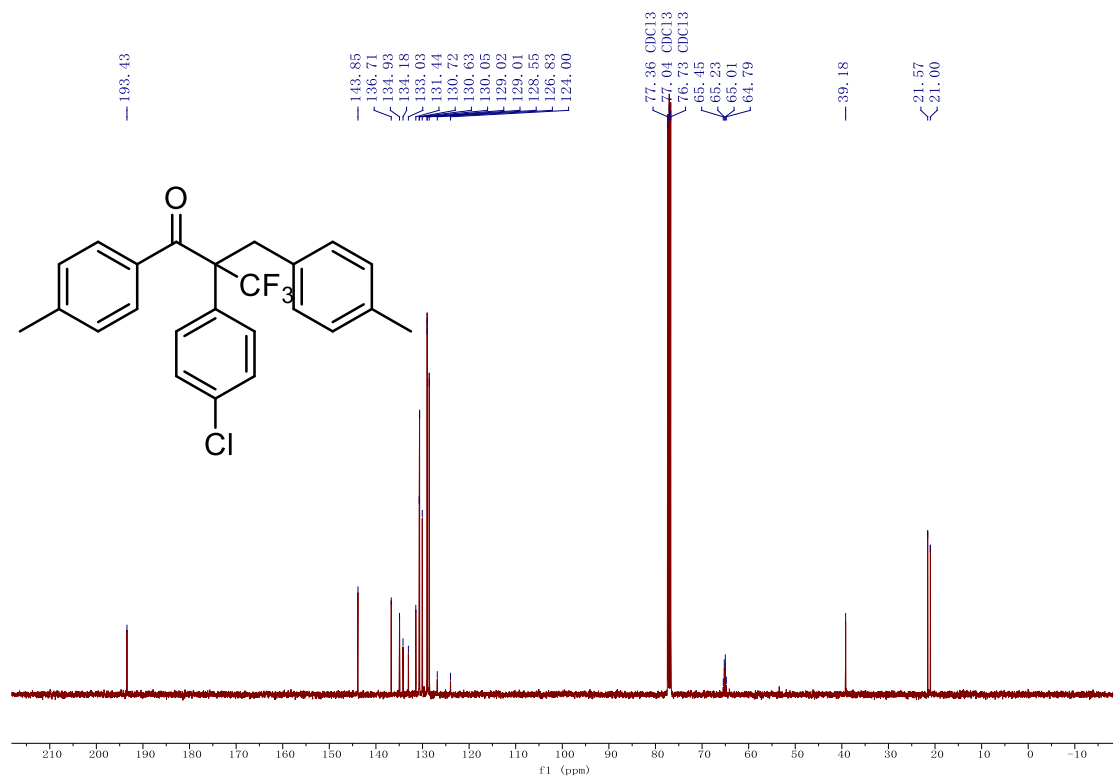

<sup>19</sup>F NMR-spectrum (376 MHz, CDCl<sub>3</sub>) of **6a**

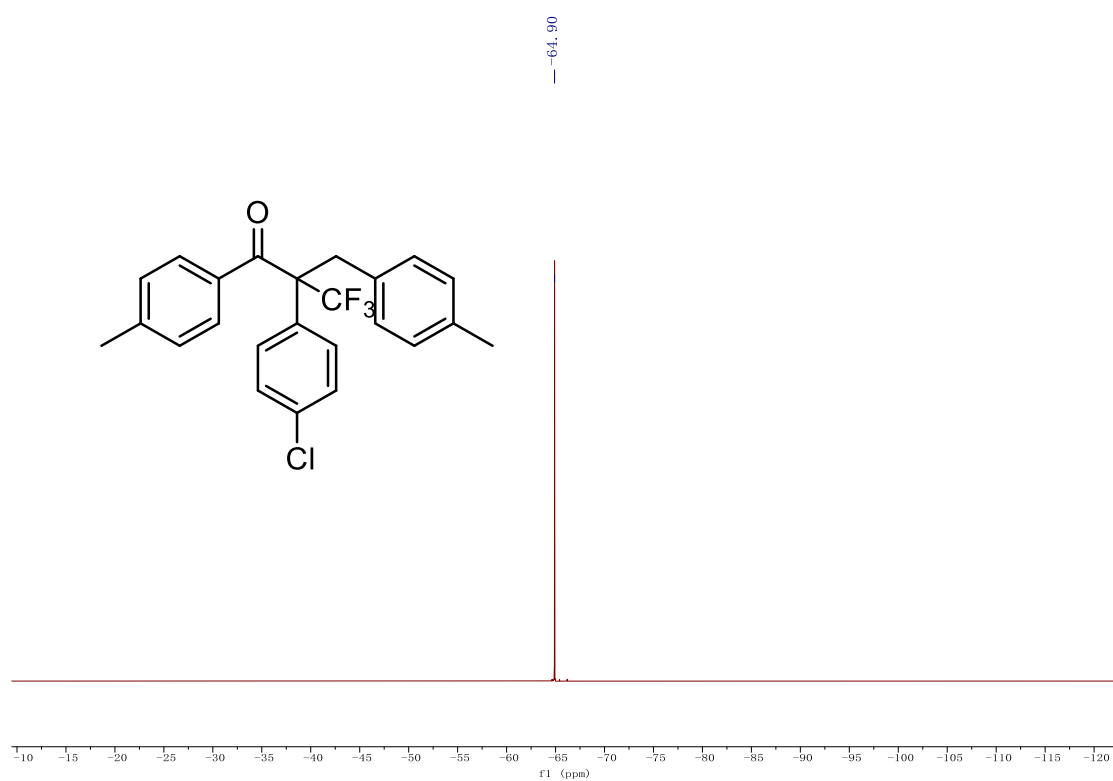

<sup>1</sup>H NMR-spectrum (400MHz, CDCl<sub>3</sub>) of **6b**

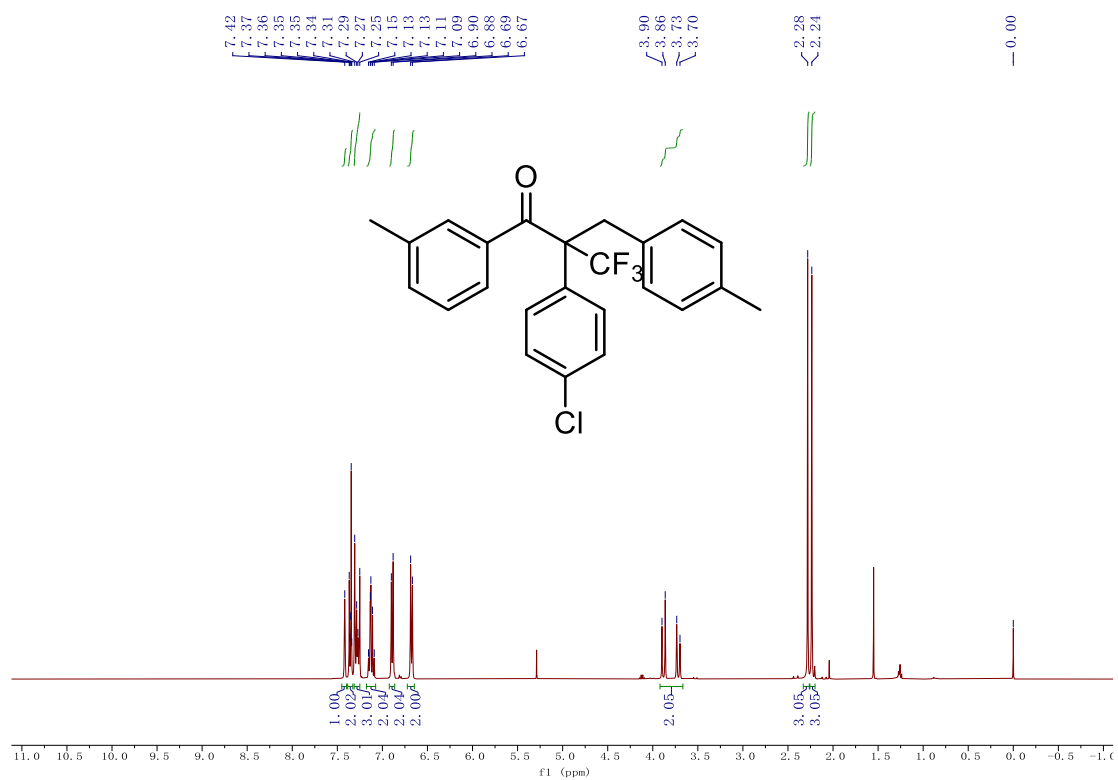

$^{13}\text{C}\{^1\text{H}\}$  NMR-spectrum (101MHz,  $\text{CDCl}_3$ ) of **6b**

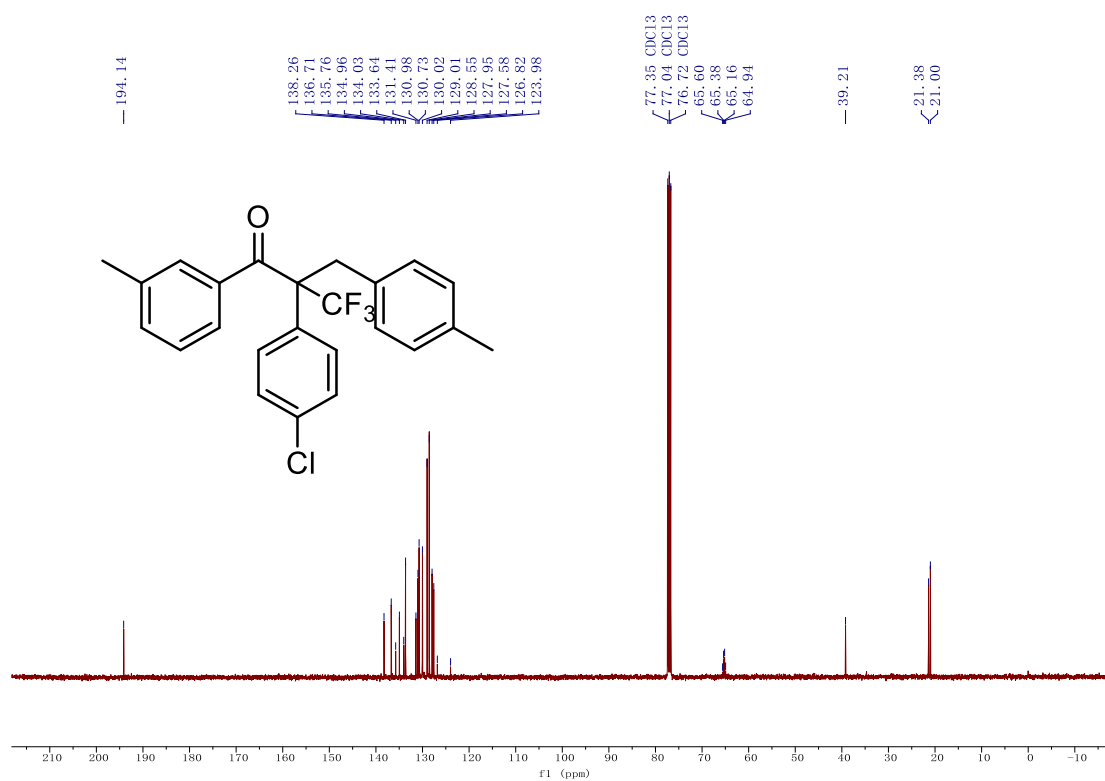

$^{19}\text{F}$  NMR-spectrum (376 MHz,  $\text{CDCl}_3$ ) of **6b**

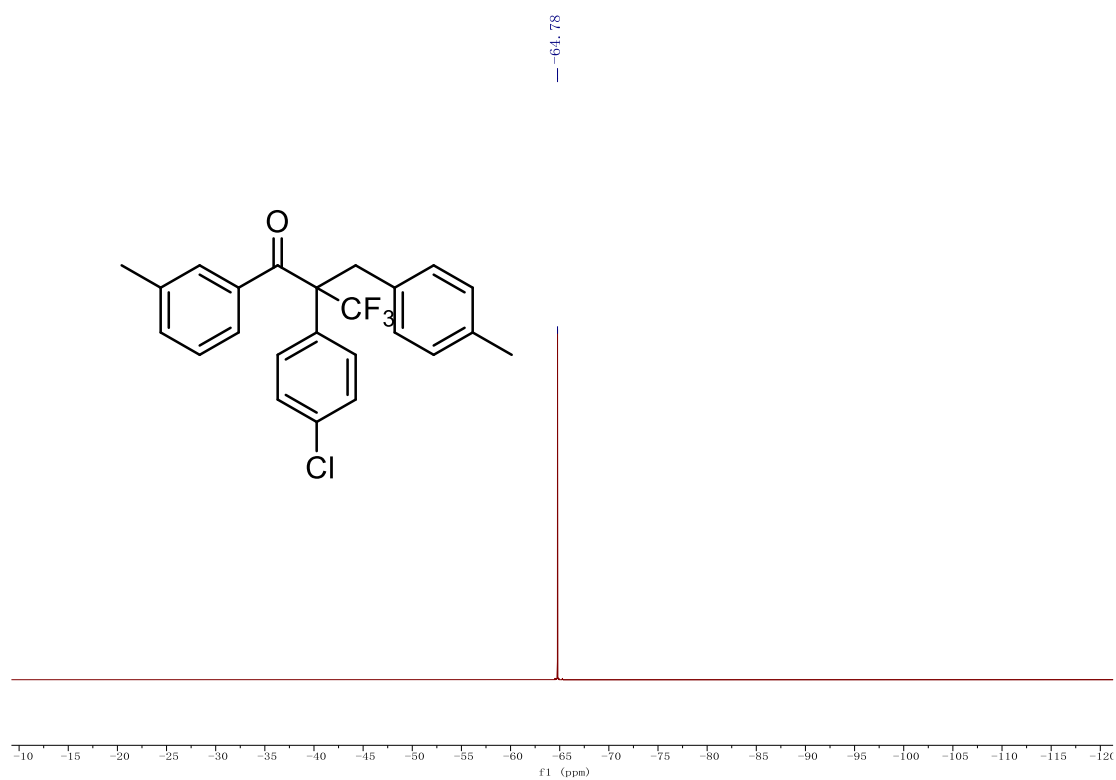

$^1\text{H}$  NMR-spectrum (400MHz,  $\text{CDCl}_3$ ) of **6c**

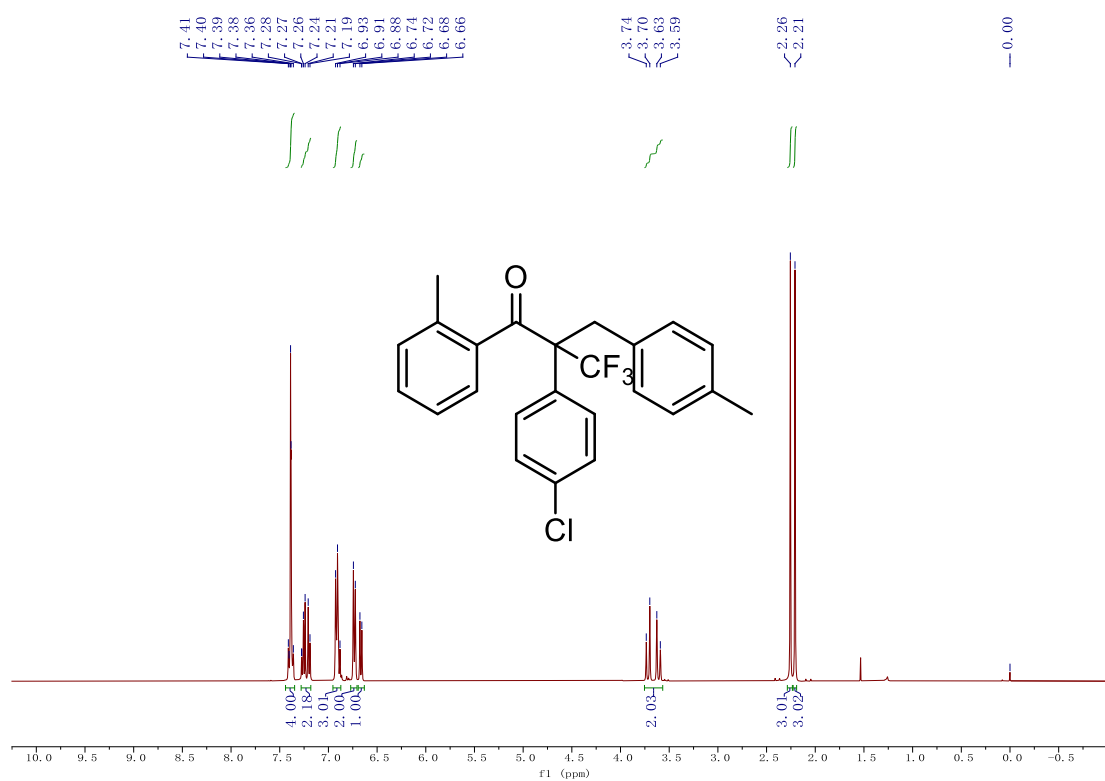

$^{13}\text{C}\{^1\text{H}\}$  NMR -spectrum (101MHz,  $\text{CDCl}_3$ ) of **6c**

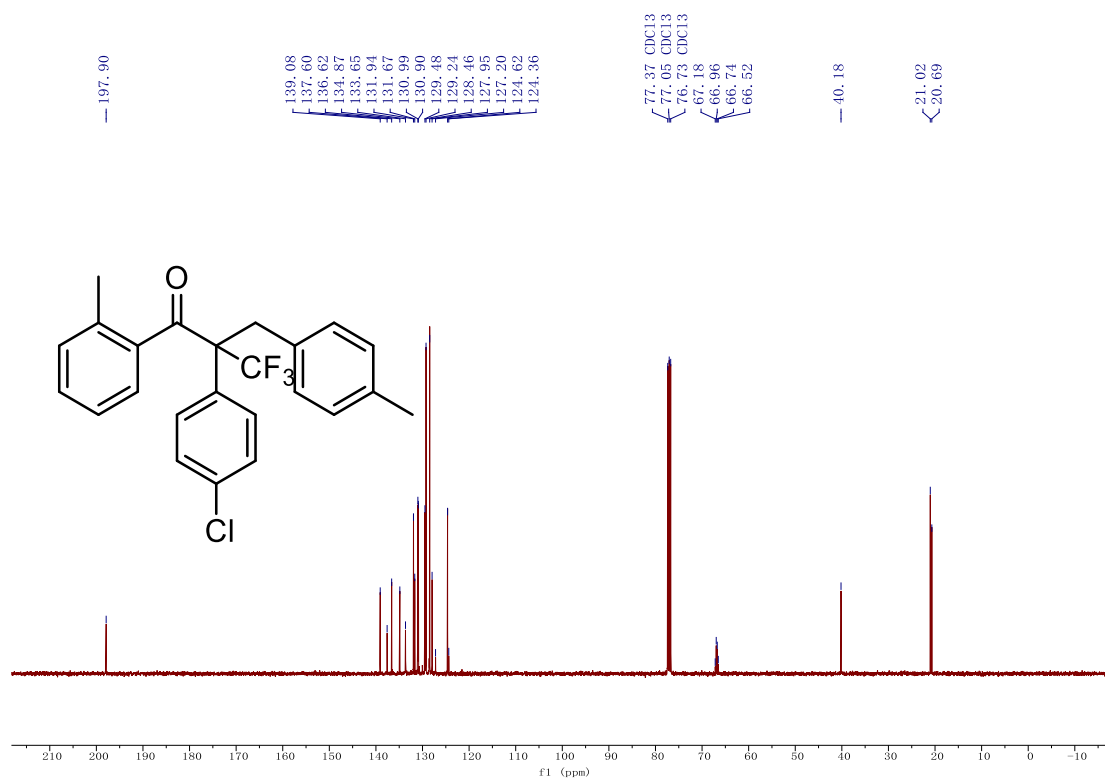

<sup>19</sup>F NMR-spectrum (376 MHz, CDCl<sub>3</sub>) of **6c**

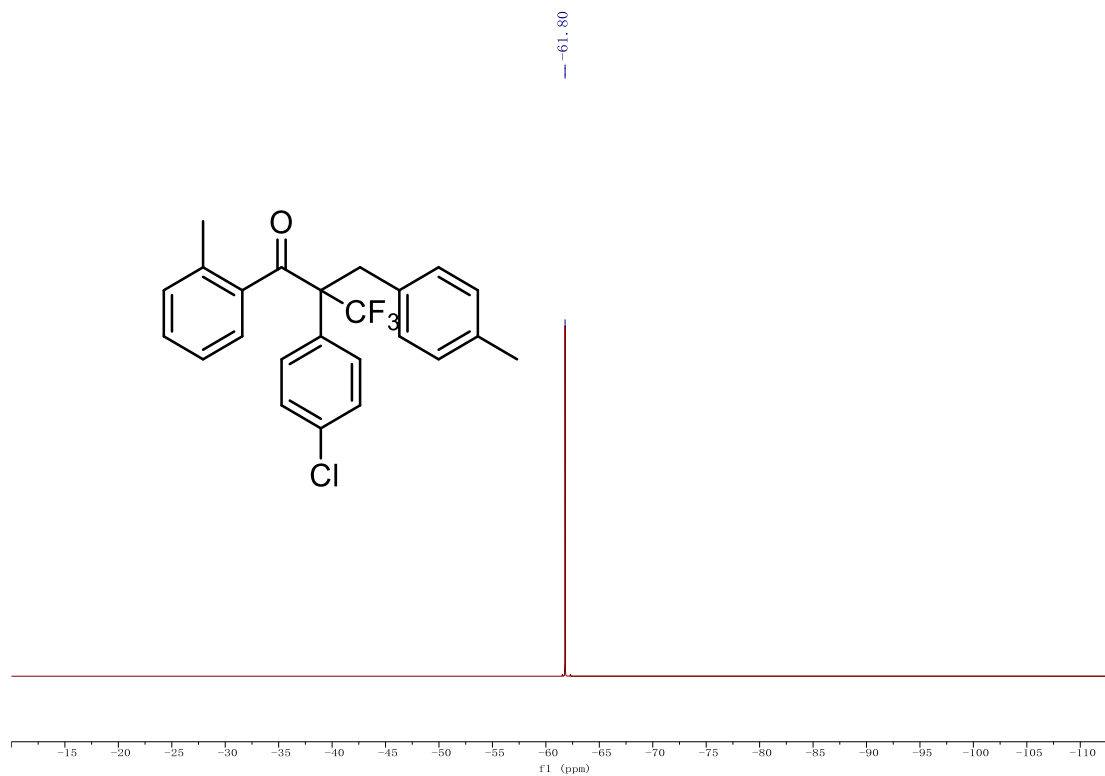

<sup>1</sup>H NMR-spectrum (400MHz, CDCl<sub>3</sub>) of **6d**

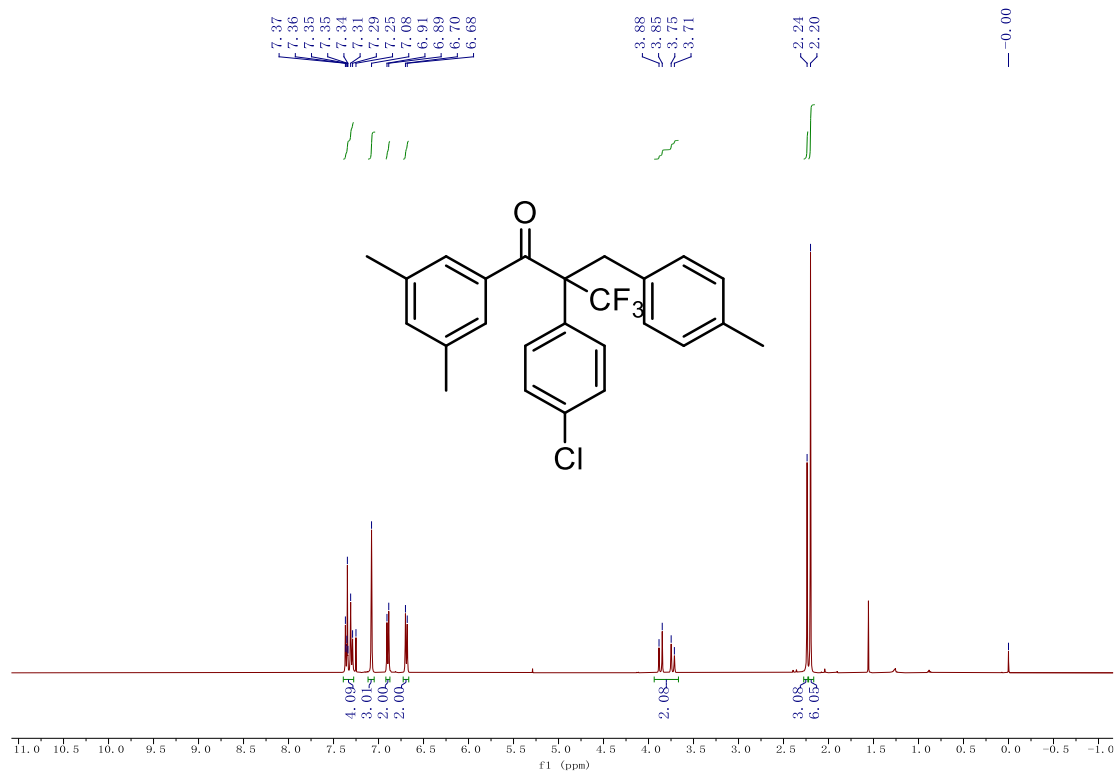

$^{13}\text{C}\{^1\text{H}\}$  NMR-spectrum (101MHz,  $\text{CDCl}_3$ ) of **6d**

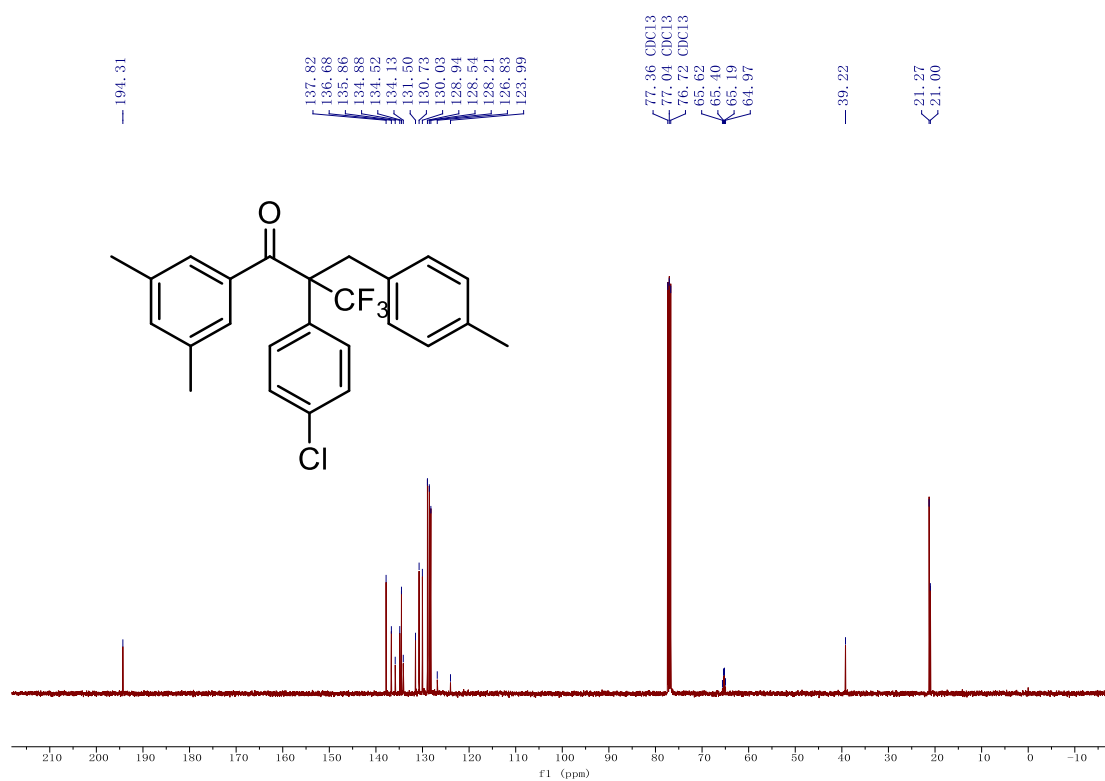

$^{19}\text{F}$  NMR-spectrum (376 MHz,  $\text{CDCl}_3$ ) of **6d**

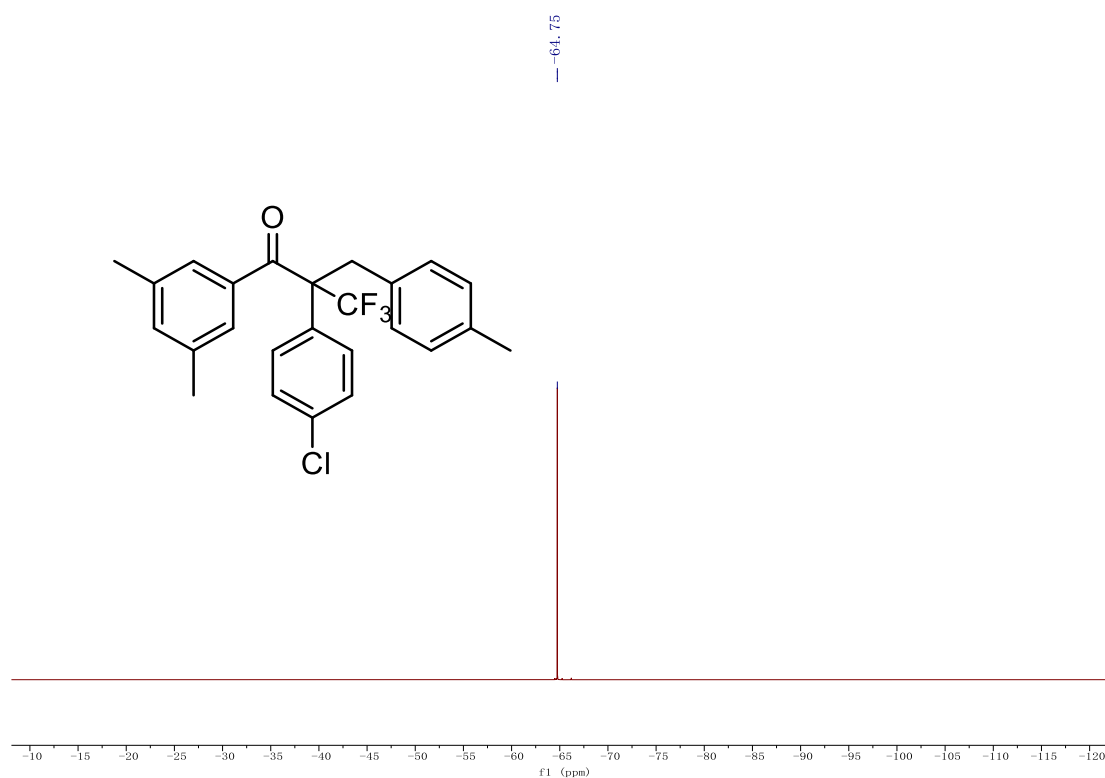

<sup>1</sup>H NMR-spectrum (400MHz, CDCl<sub>3</sub>) of **6e**

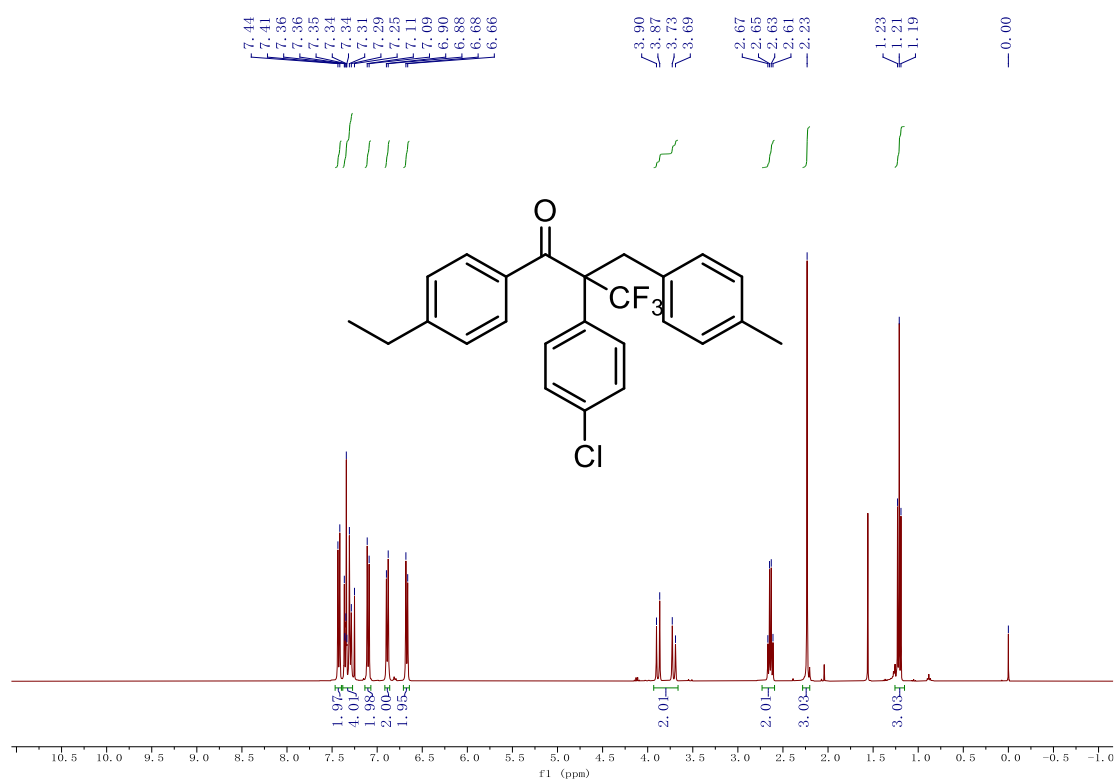

<sup>13</sup>C{<sup>1</sup>H} NMR -spectrum (101MHz, CDCl<sub>3</sub>) of **6e**

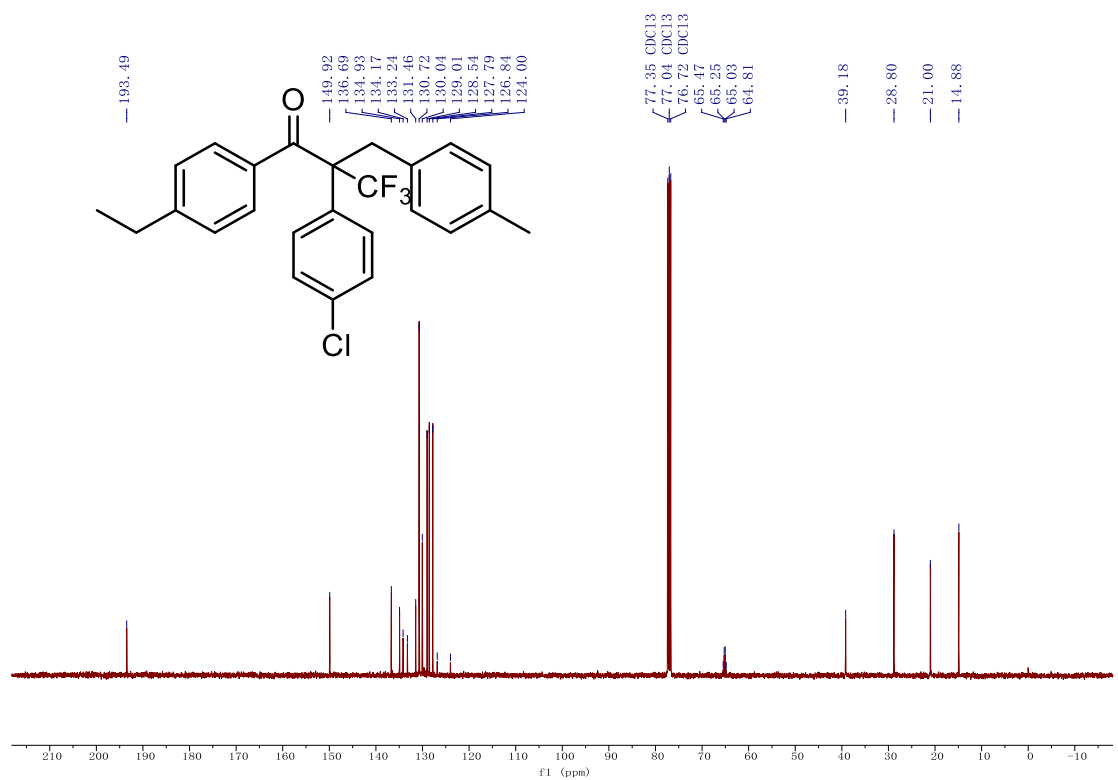

<sup>19</sup>F NMR-spectrum (376 MHz, CDCl<sub>3</sub>) of **6e**

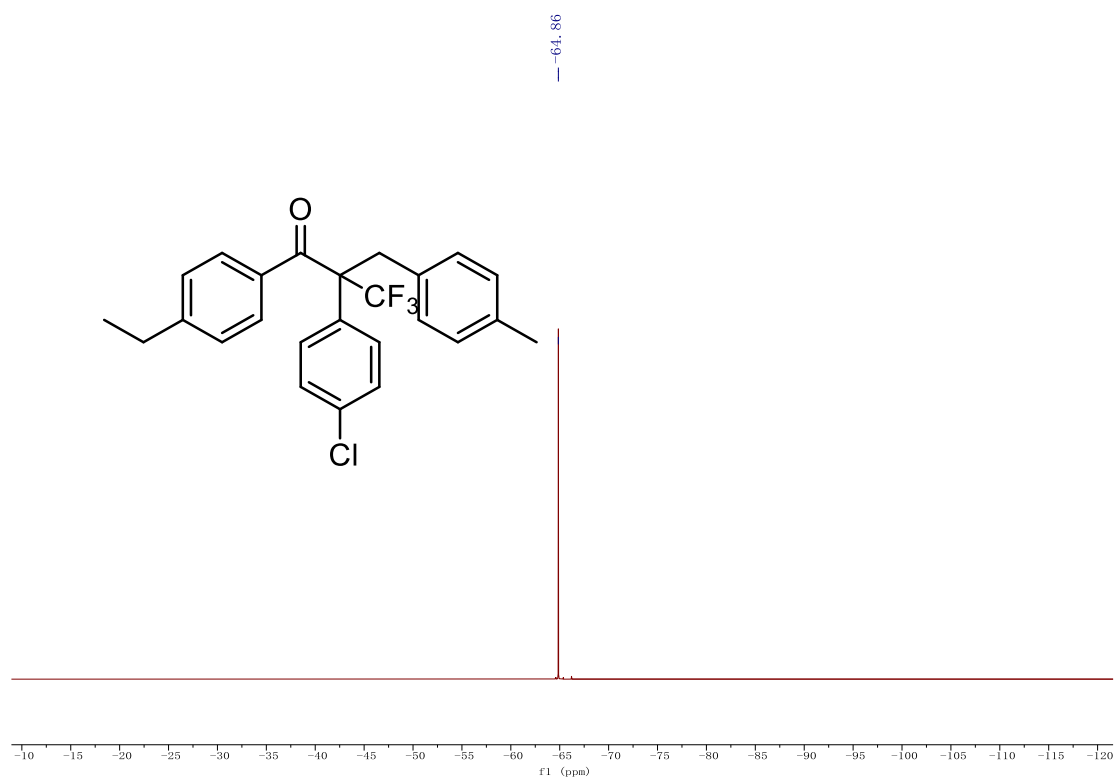

<sup>1</sup>H NMR-spectrum (400MHz, CDCl<sub>3</sub>) of **6f**

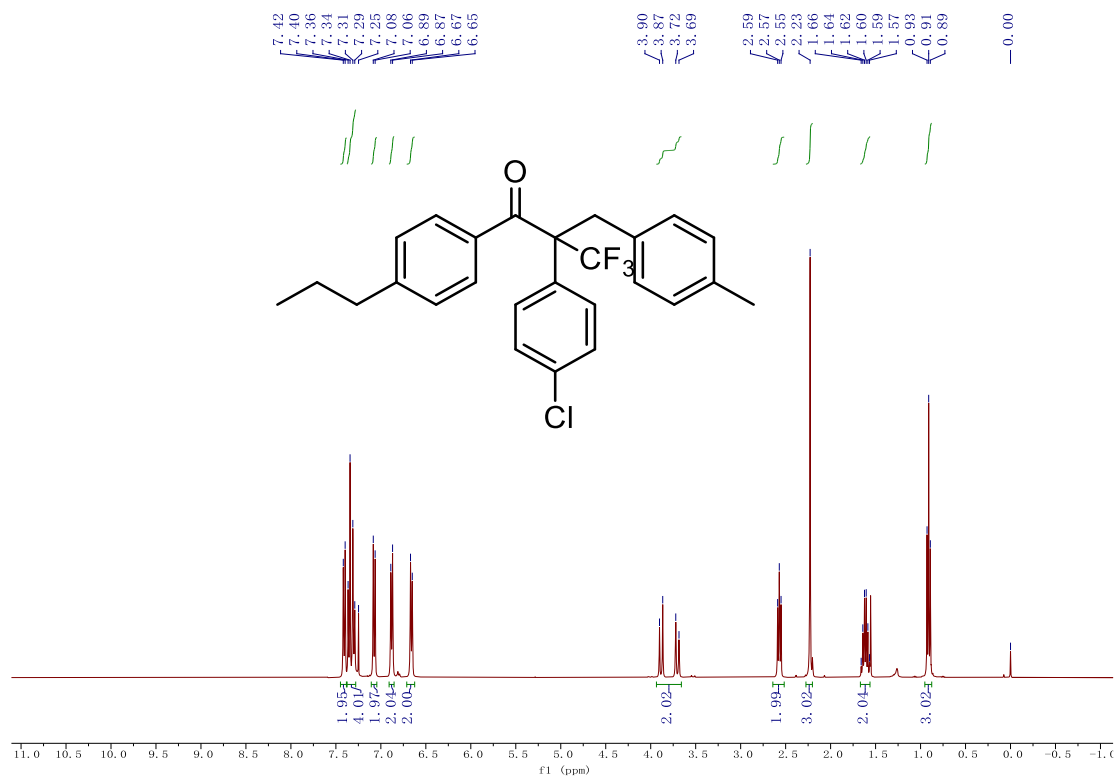

$^{13}\text{C}\{^1\text{H}\}$  NMR-spectrum (101MHz,  $\text{CDCl}_3$ ) of **6f**

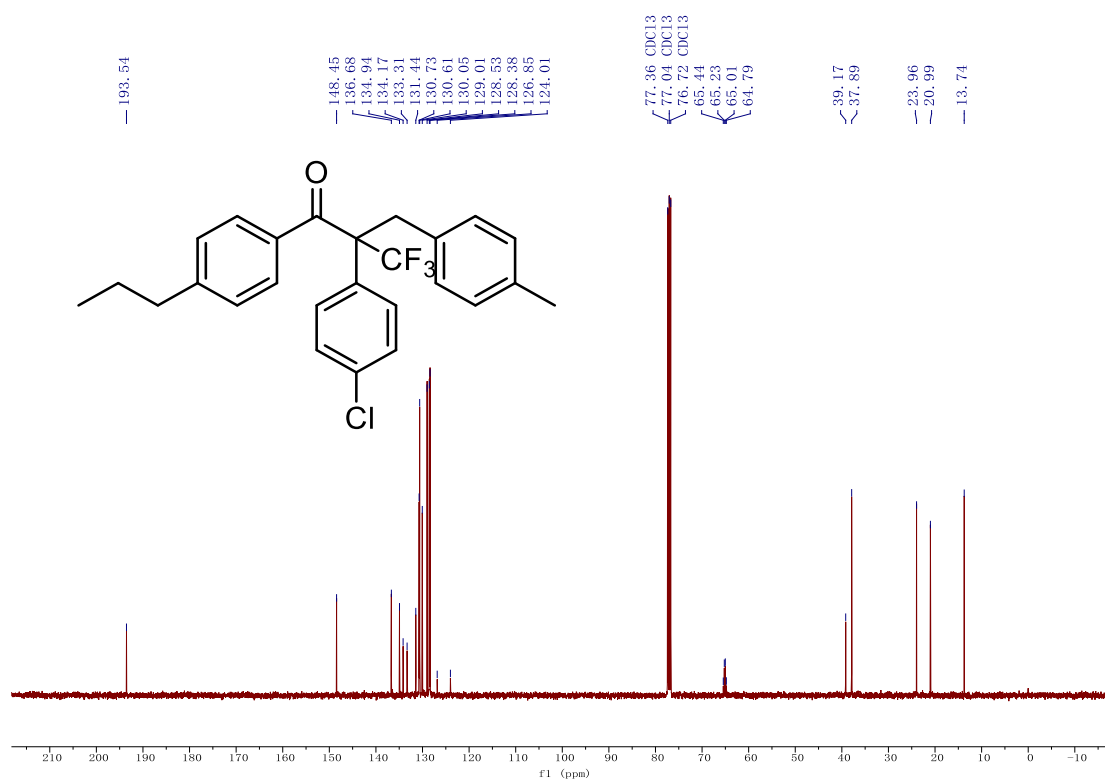

$^{19}\text{F}$  NMR-spectrum (376 MHz,  $\text{CDCl}_3$ ) of **6f**

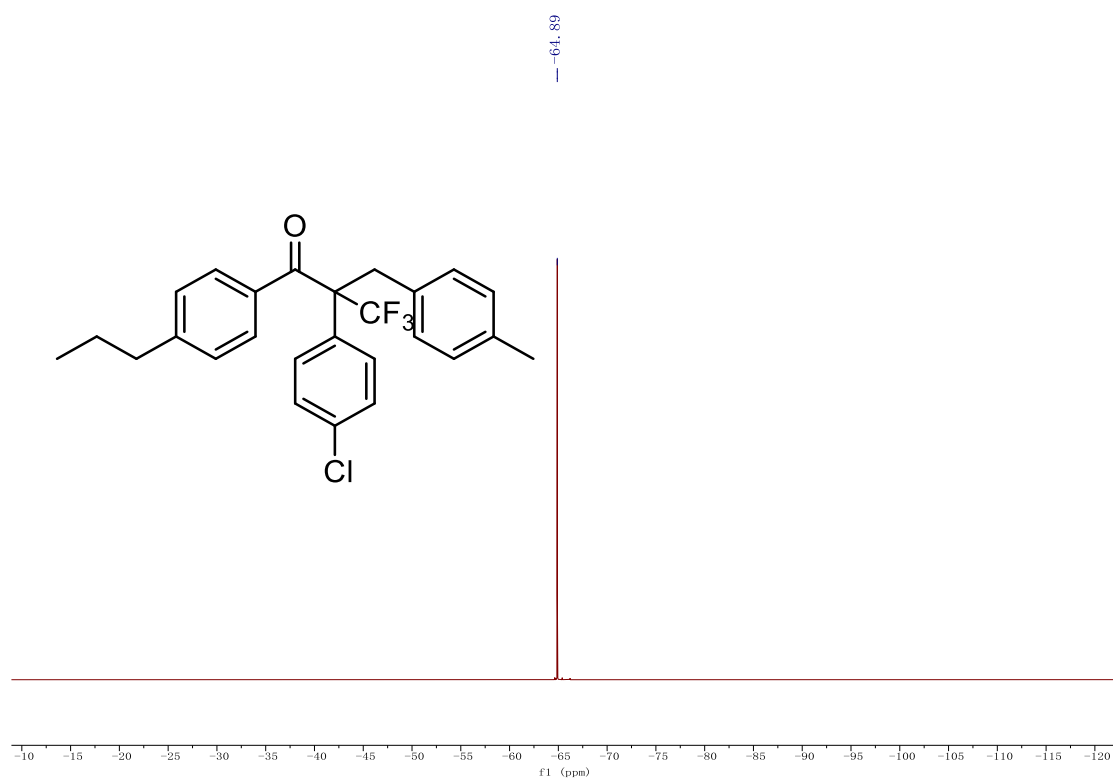

<sup>1</sup>H NMR-spectrum (400MHz, CDCl<sub>3</sub>) of **6g**

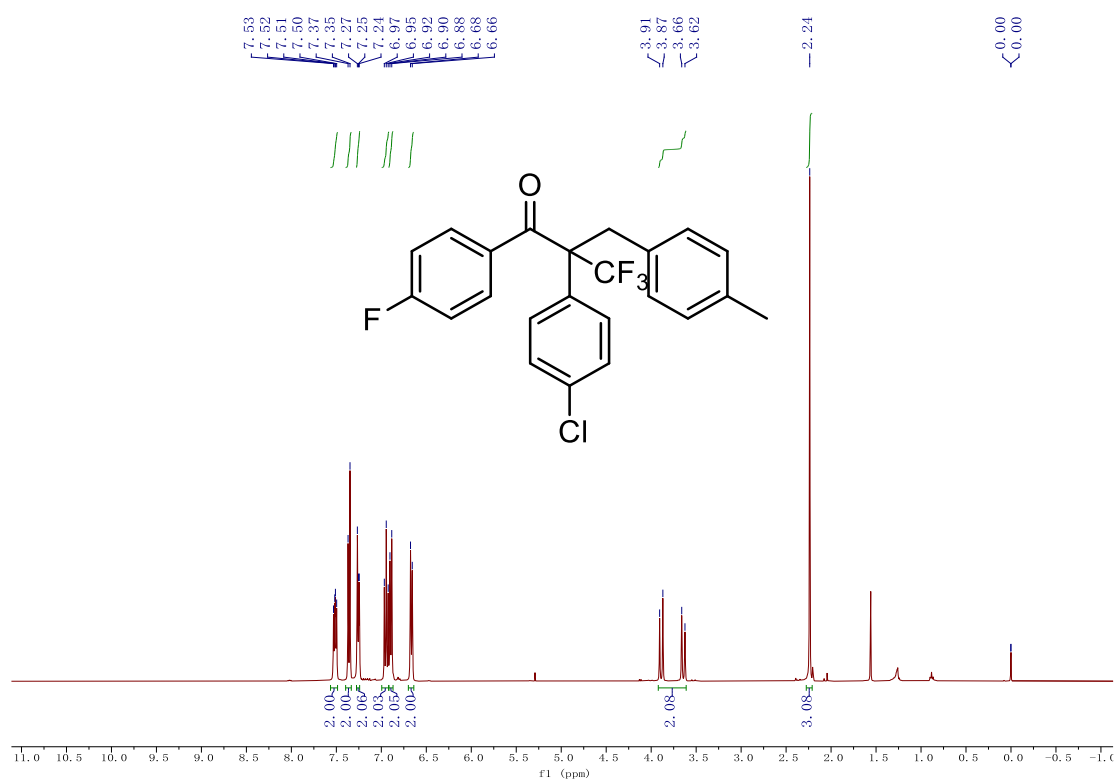

<sup>13</sup>C{<sup>1</sup>H} NMR-spectrum (101MHz, CDCl<sub>3</sub>) of **6g**

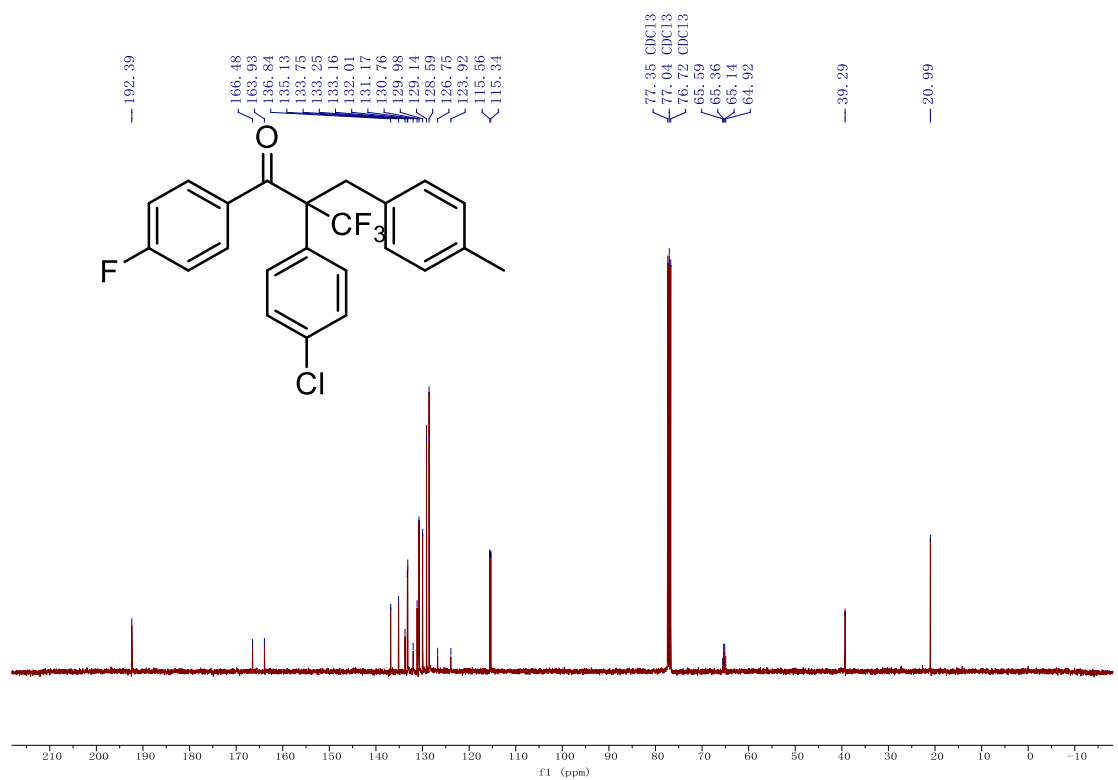

<sup>19</sup>F NMR-spectrum (376 MHz, CDCl<sub>3</sub>) of **6g**

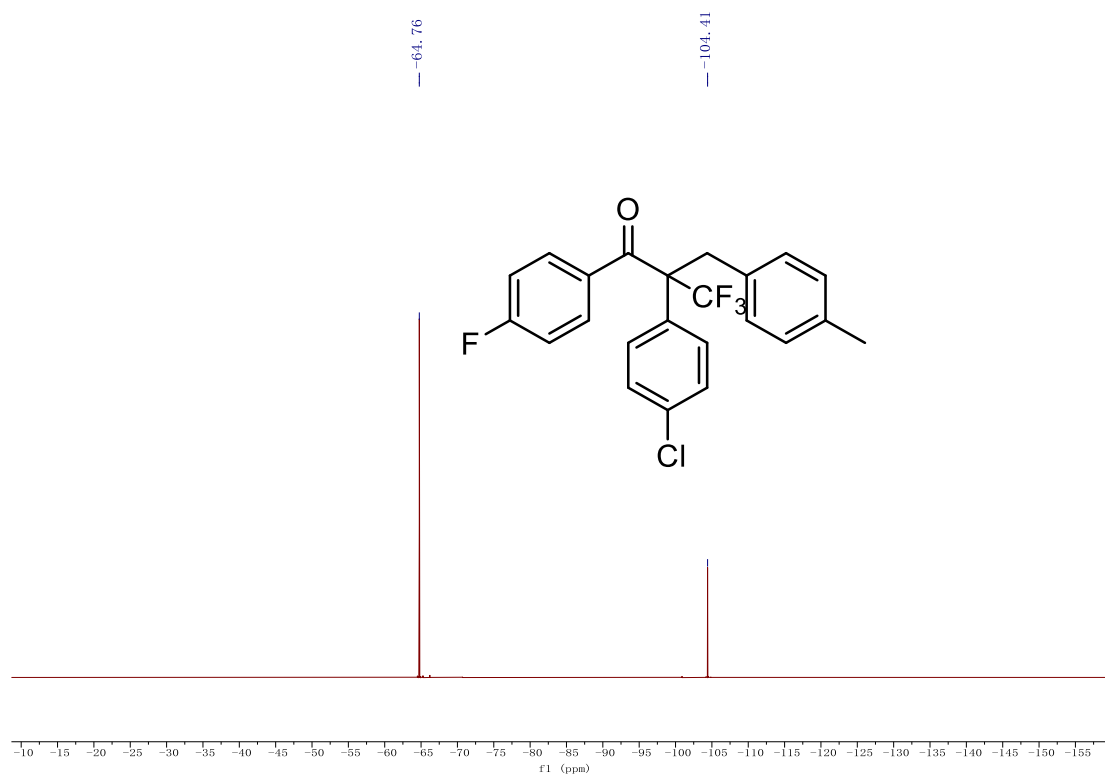

<sup>1</sup>H NMR-spectrum (400MHz, CDCl<sub>3</sub>) of **6h**

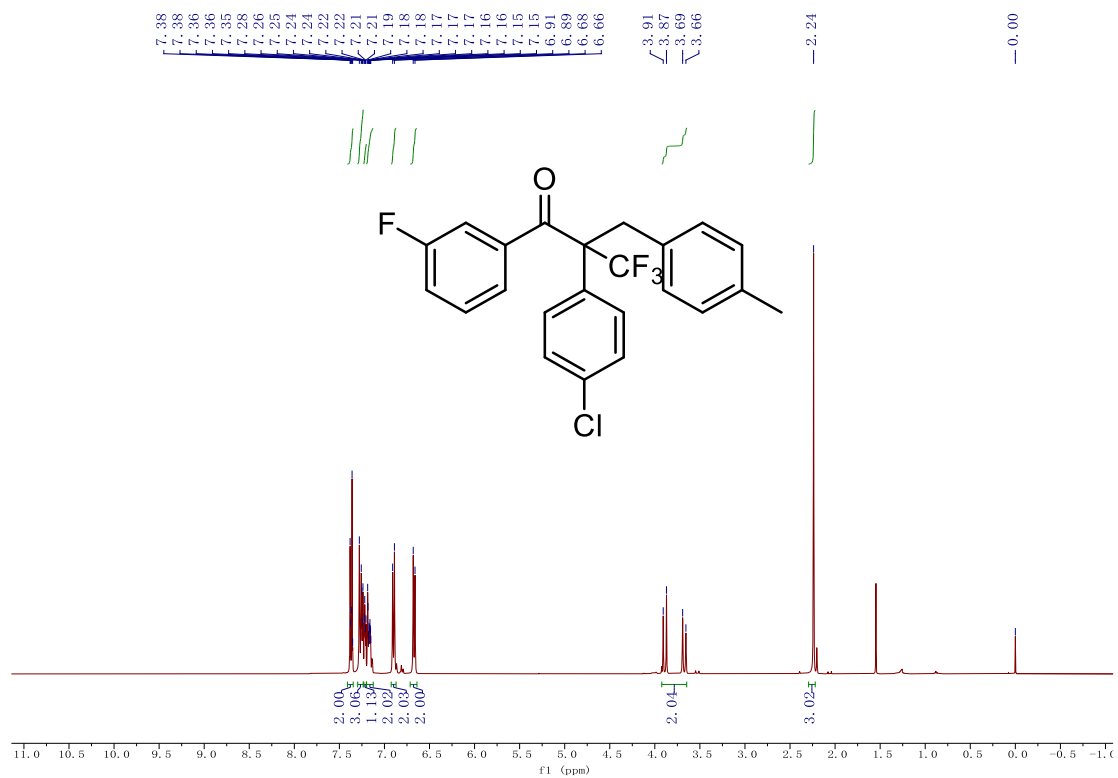

$^{13}\text{C}\{^1\text{H}\}$  NMR -spectrum (101MHz,  $\text{CDCl}_3$ ) of **6h**

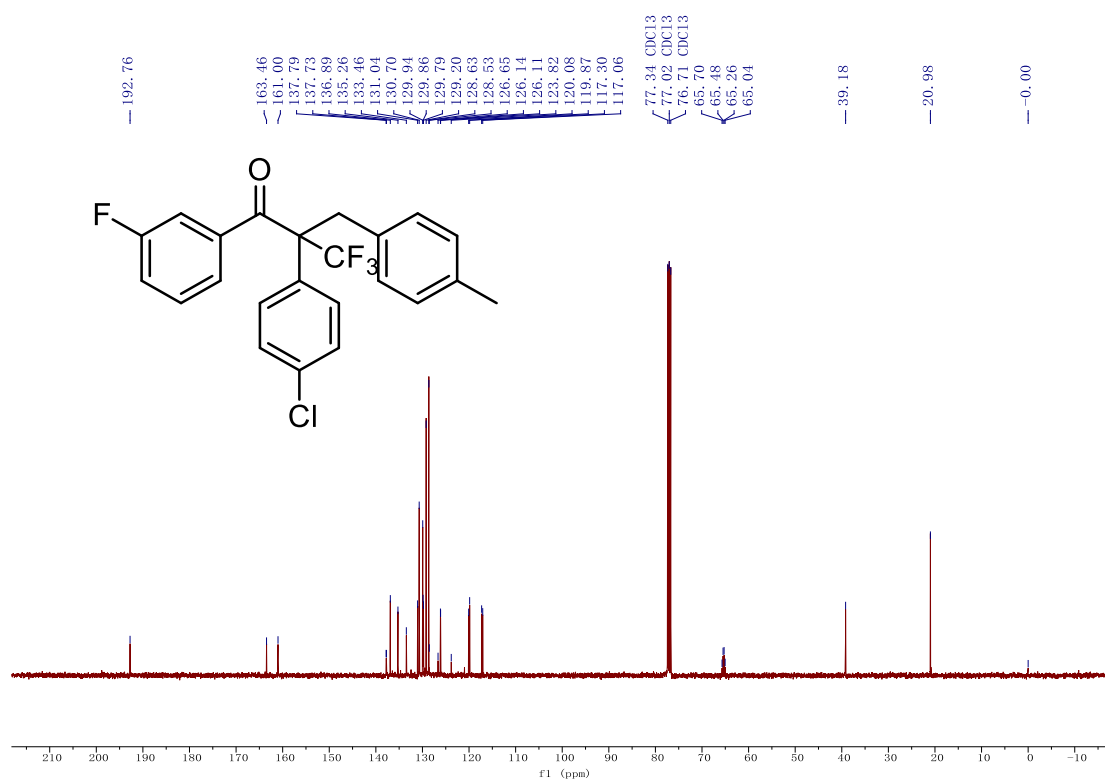

$^{19}\text{F}$  NMR-spectrum (376 MHz,  $\text{CDCl}_3$ ) of **6h**

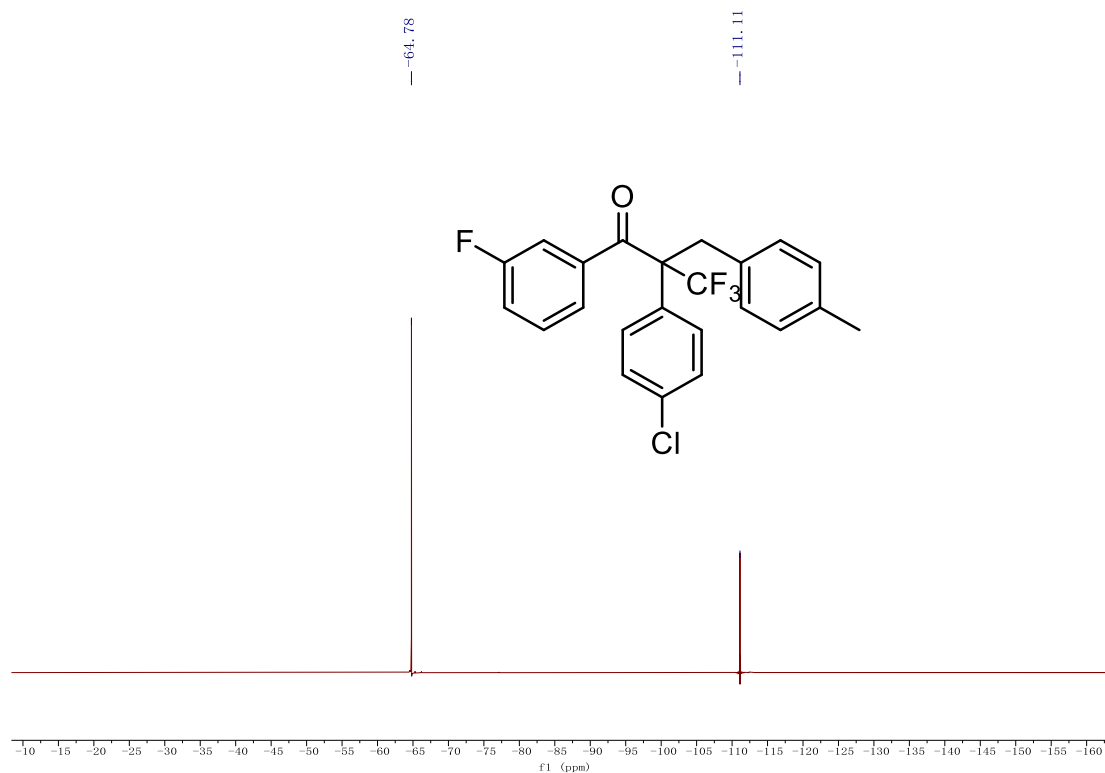

<sup>1</sup>H NMR-spectrum (400MHz, CDCl<sub>3</sub>) of **6i**

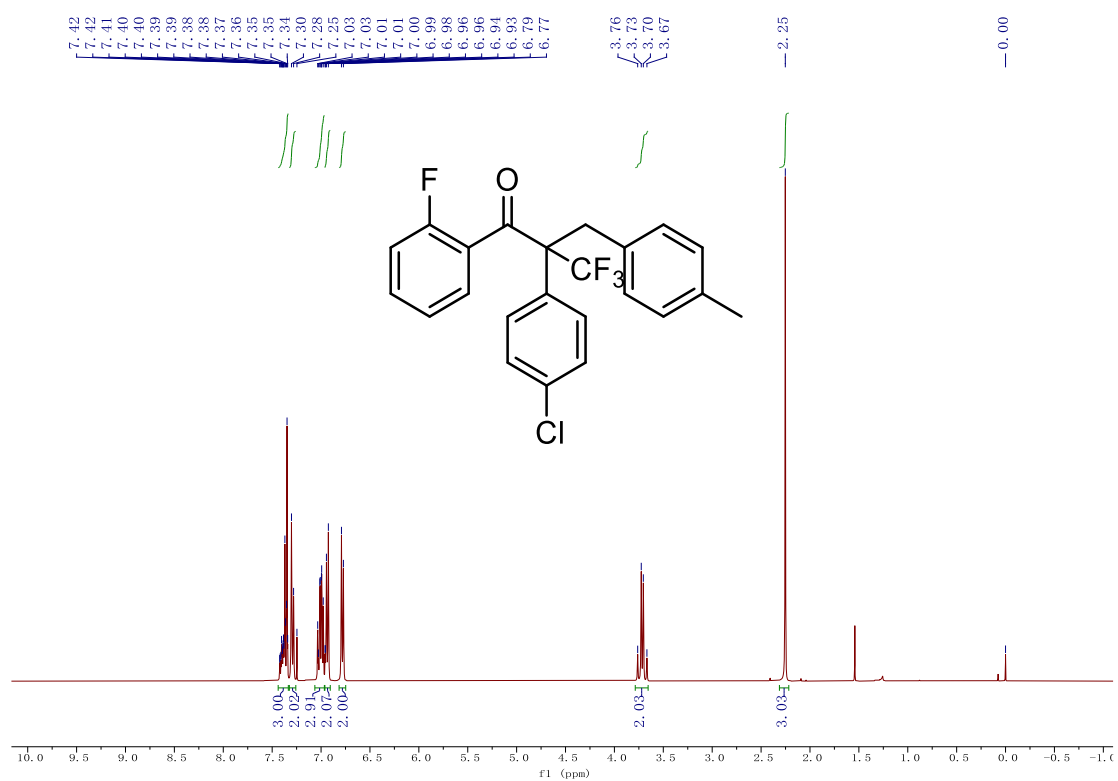

<sup>13</sup>C{<sup>1</sup>H} NMR -spectrum (101MHz, CDCl<sub>3</sub>) of **6i**

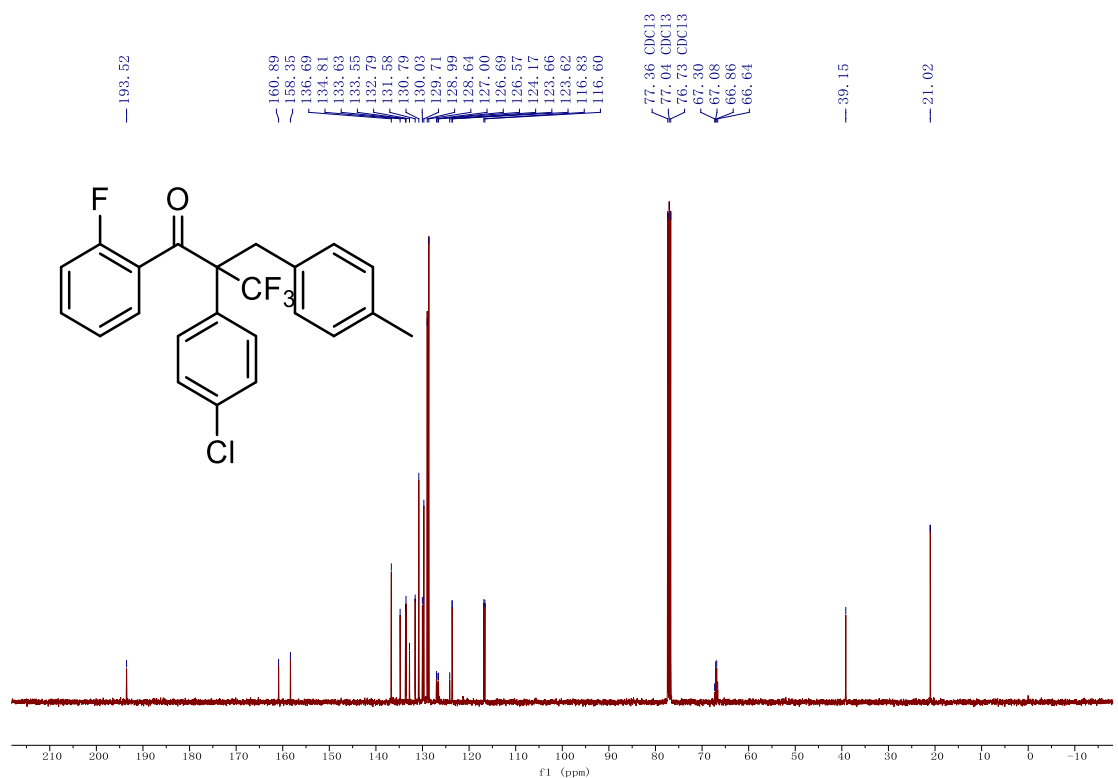

**<sup>19</sup>F NMR-spectrum (376 MHz, CDCl<sub>3</sub>) of 6i**

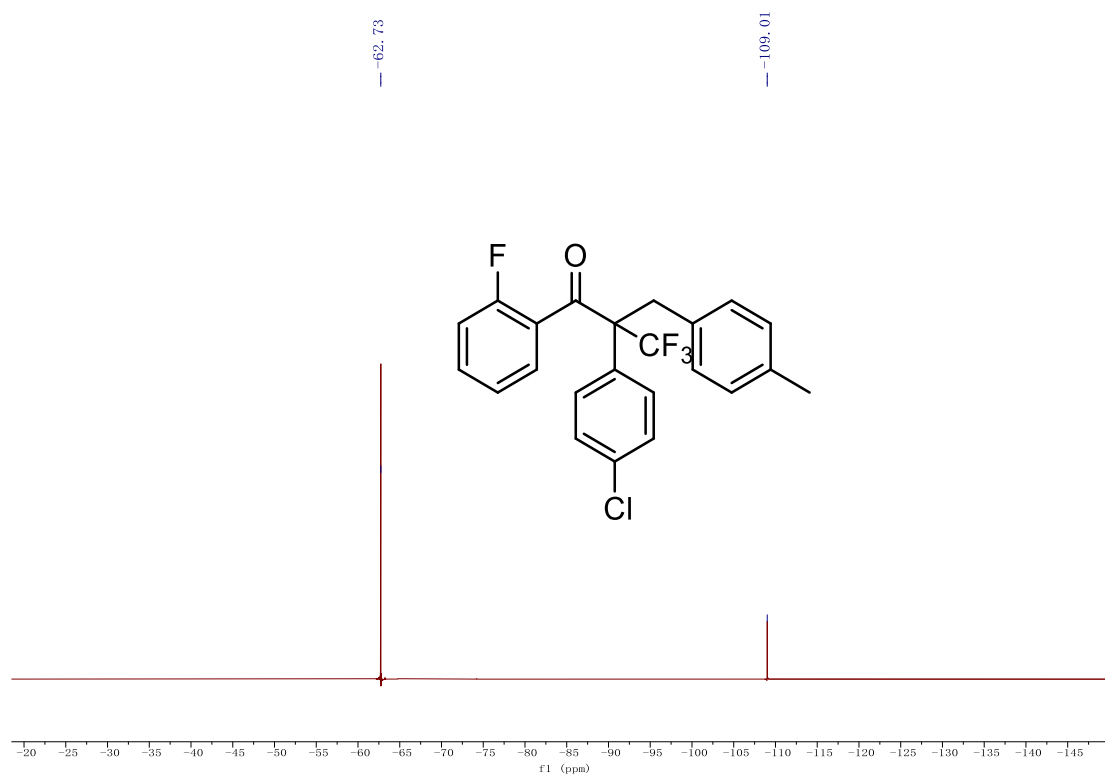

**<sup>1</sup>H NMR-spectrum (400MHz, CDCl<sub>3</sub>) of 6j**

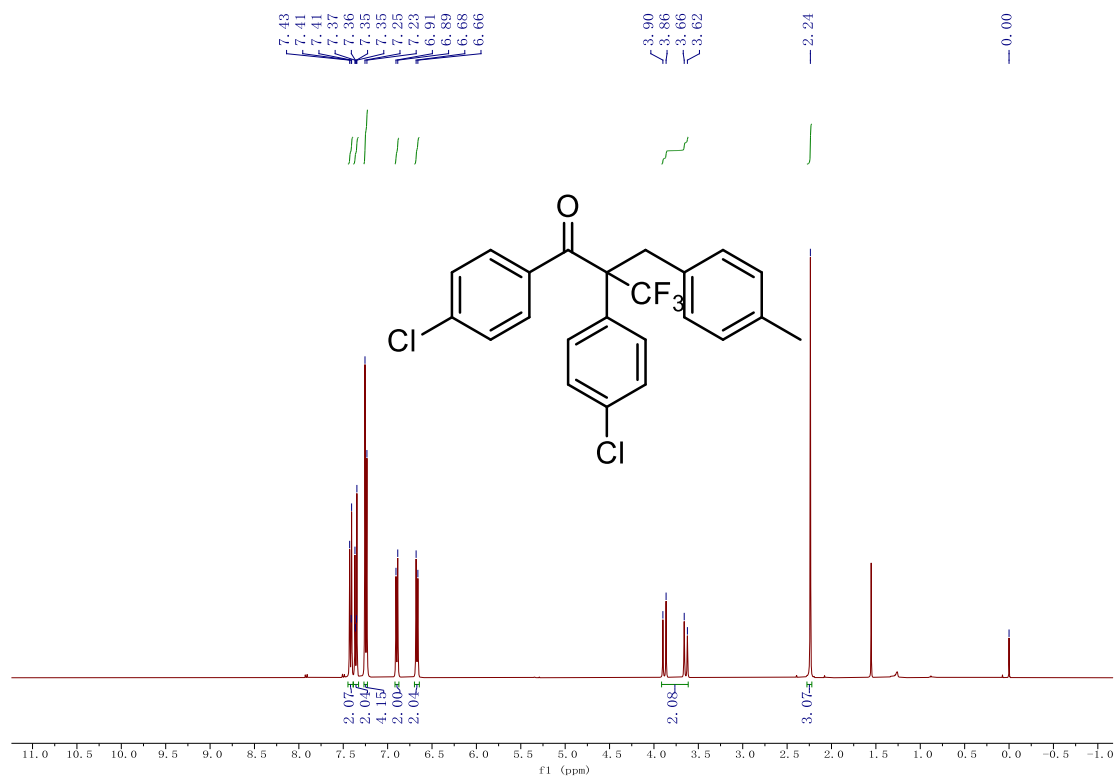

$^{13}\text{C}\{^1\text{H}\}$  NMR-spectrum (101MHz,  $\text{CDCl}_3$ ) of **6j**

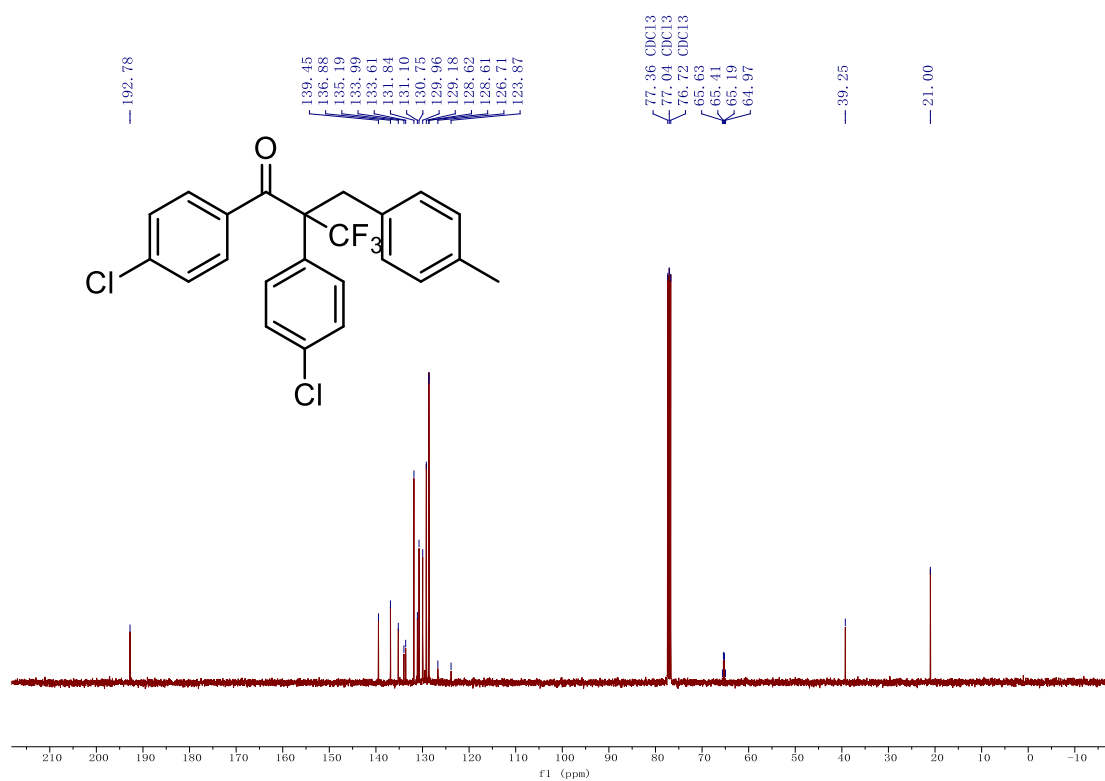

$^{19}\text{F}$  NMR-spectrum (376 MHz,  $\text{CDCl}_3$ ) of **6j**

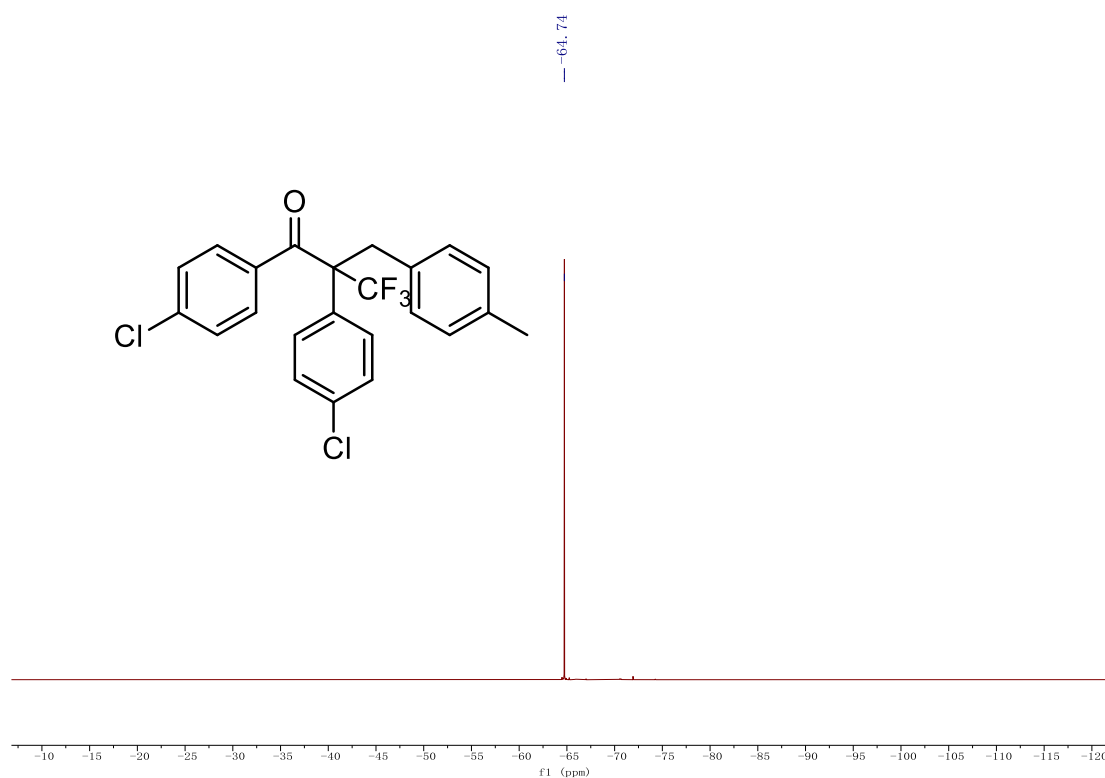

<sup>1</sup>H NMR-spectrum (400MHz, CDCl<sub>3</sub>) of **6k**

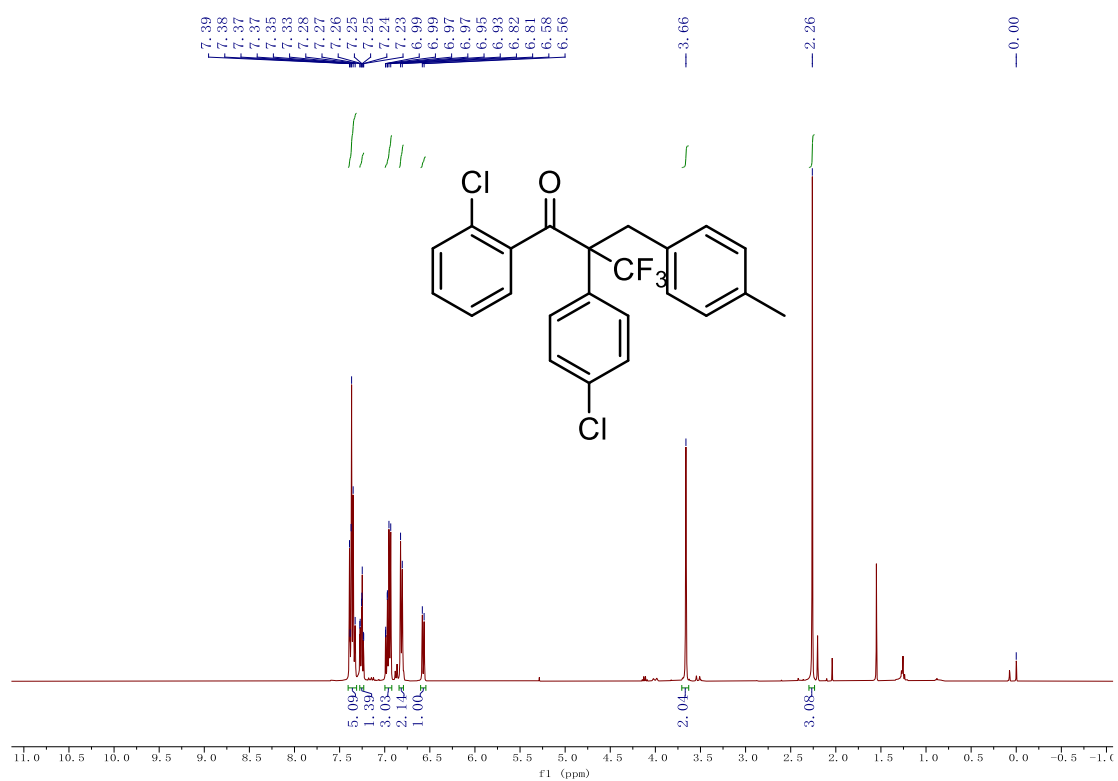

<sup>13</sup>C{<sup>1</sup>H} NMR-spectrum (101MHz, CDCl<sub>3</sub>) of **6k**

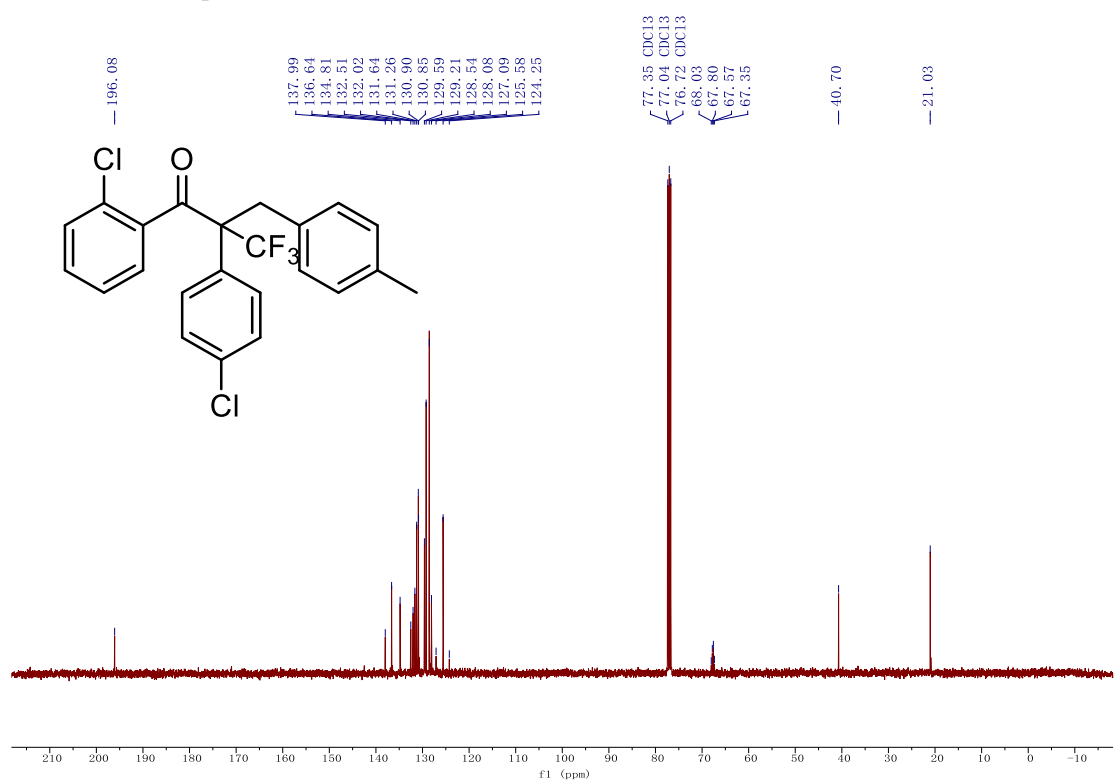

<sup>19</sup>F NMR-spectrum (376 MHz, CDCl<sub>3</sub>) of **6k**

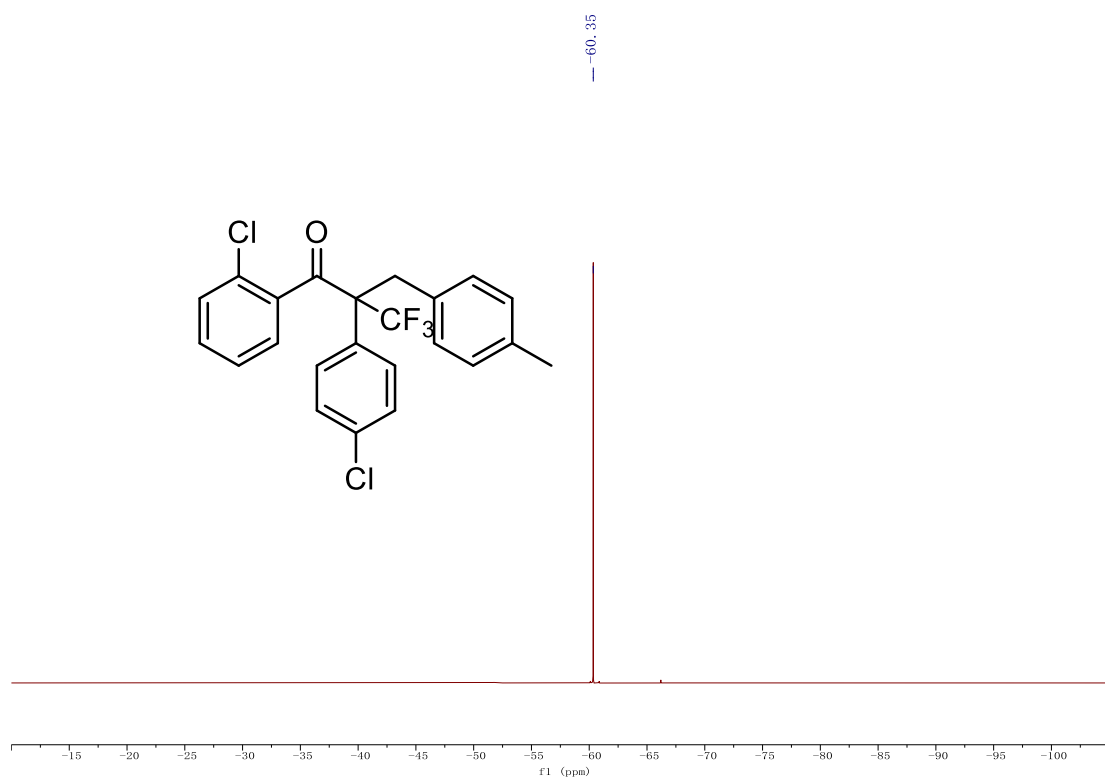

<sup>1</sup>H NMR-spectrum (400MHz, CDCl<sub>3</sub>) of **6l**

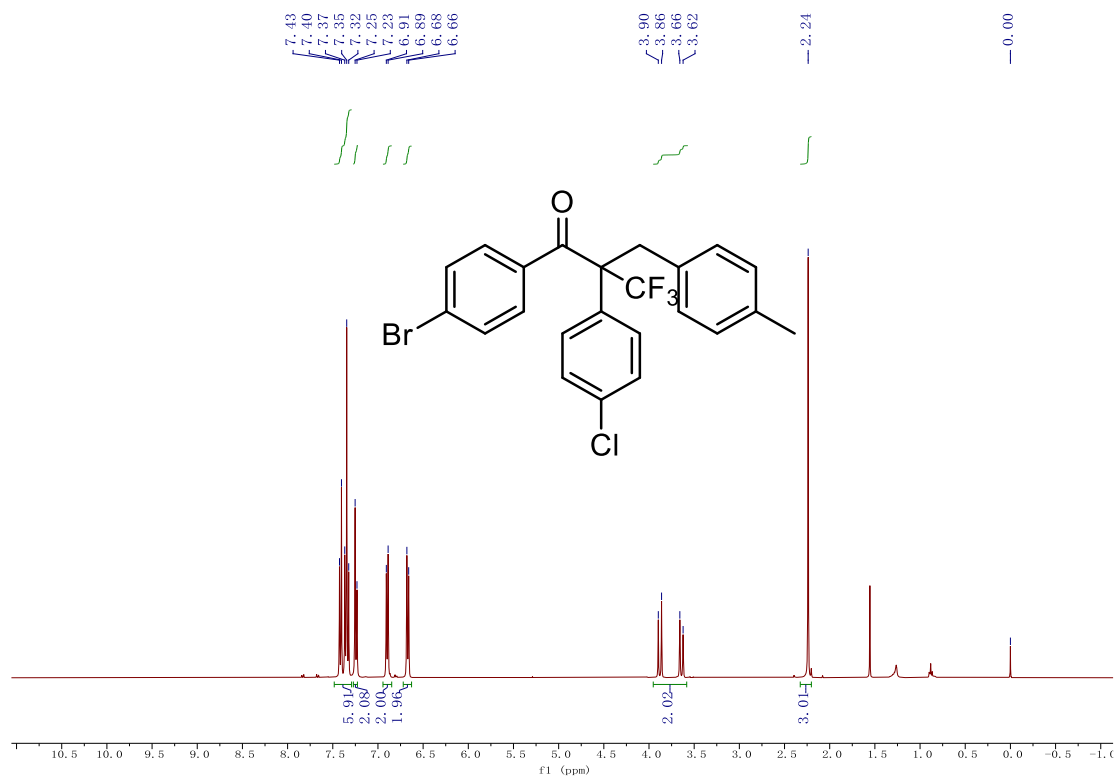

$^{13}\text{C}\{^1\text{H}\}$  NMR-spectrum (101MHz,  $\text{CDCl}_3$ ) of **61**

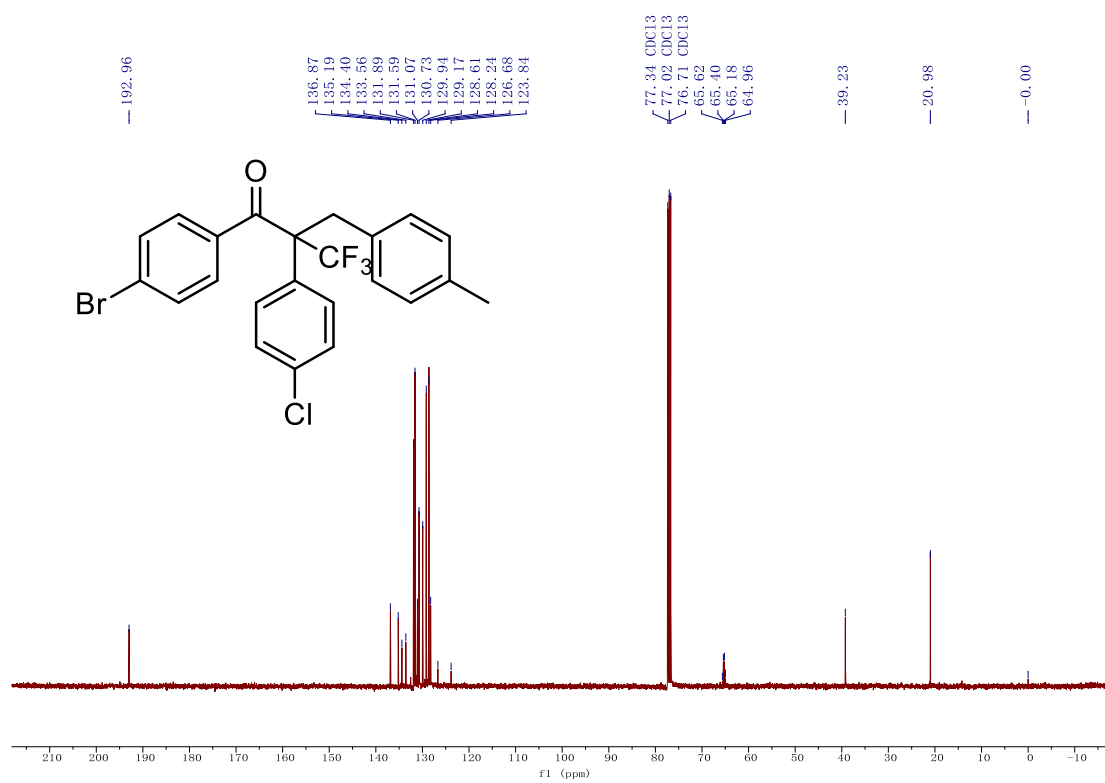

$^{19}\text{F}$  NMR-spectrum (376 MHz,  $\text{CDCl}_3$ ) of **61**

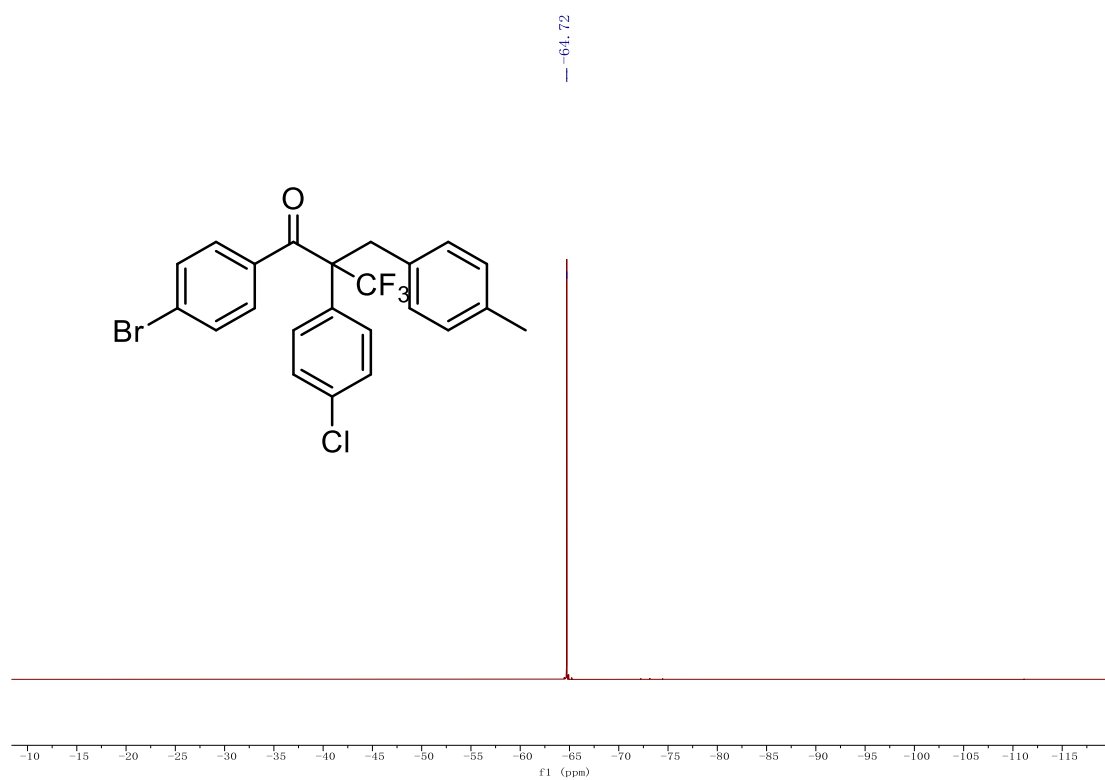

<sup>1</sup>H NMR-spectrum (400MHz, CDCl<sub>3</sub>) of 7

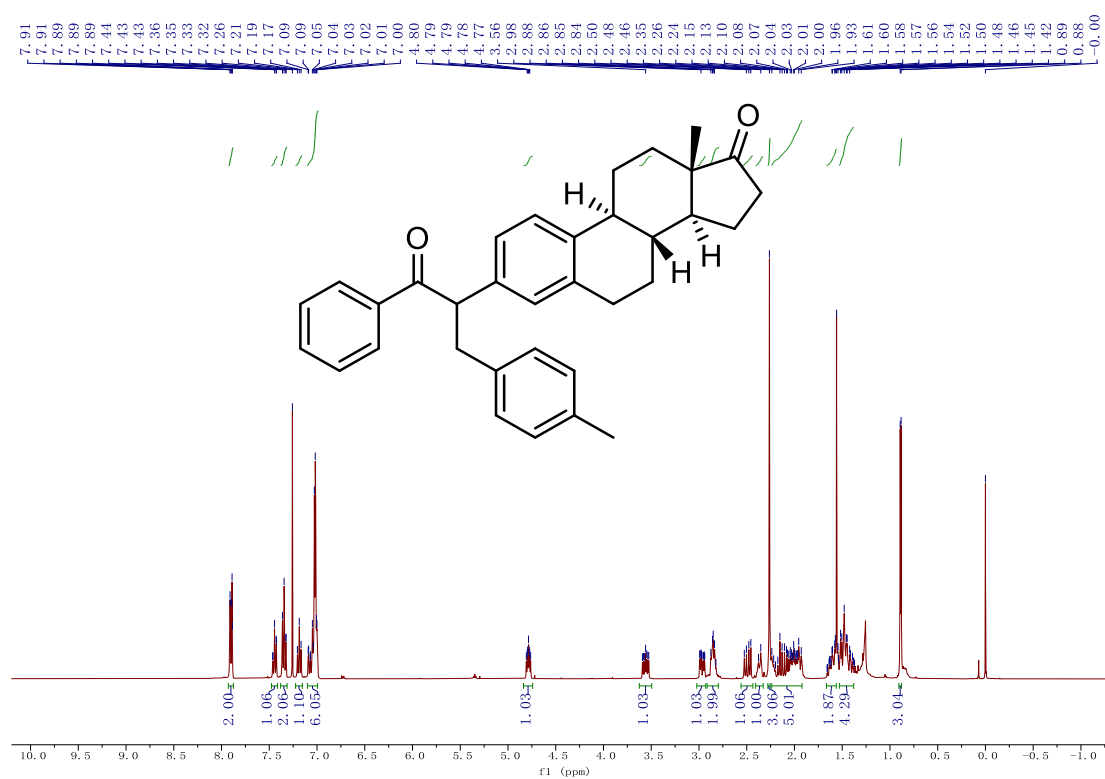

<sup>13</sup>C{<sup>1</sup>H} NMR-spectrum (101MHz, CDCl<sub>3</sub>) of 7

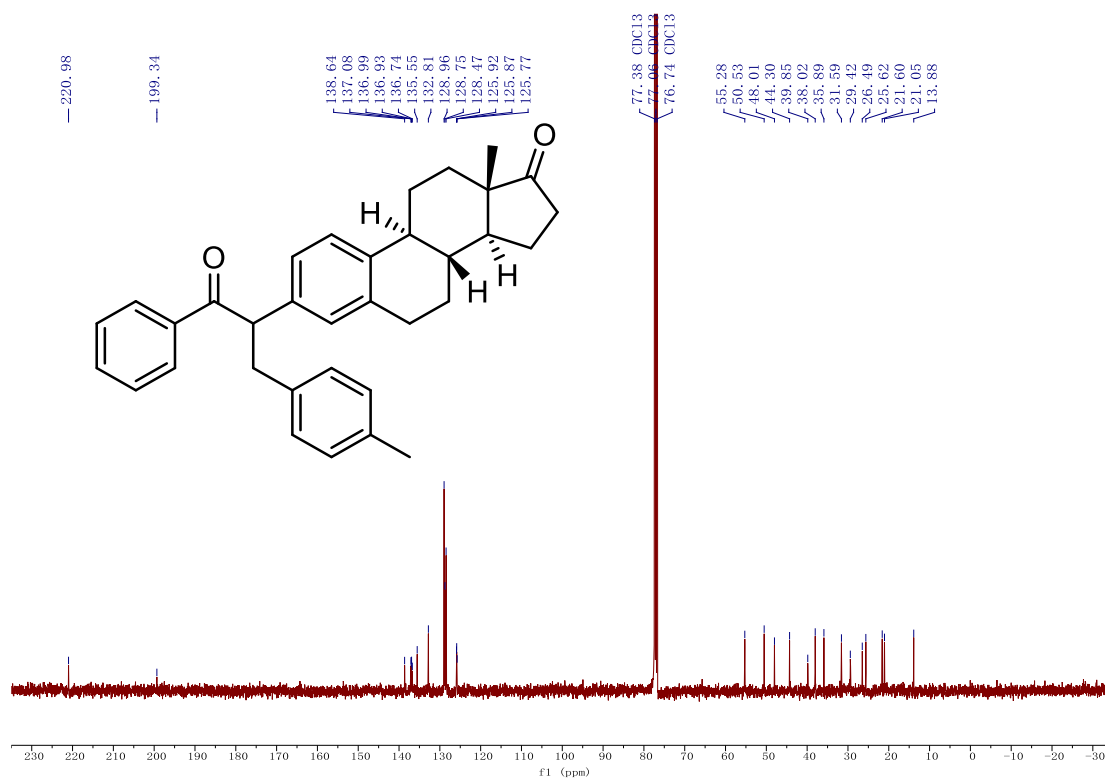

<sup>1</sup>H NMR-spectrum (400MHz, CDCl<sub>3</sub>) of **8**

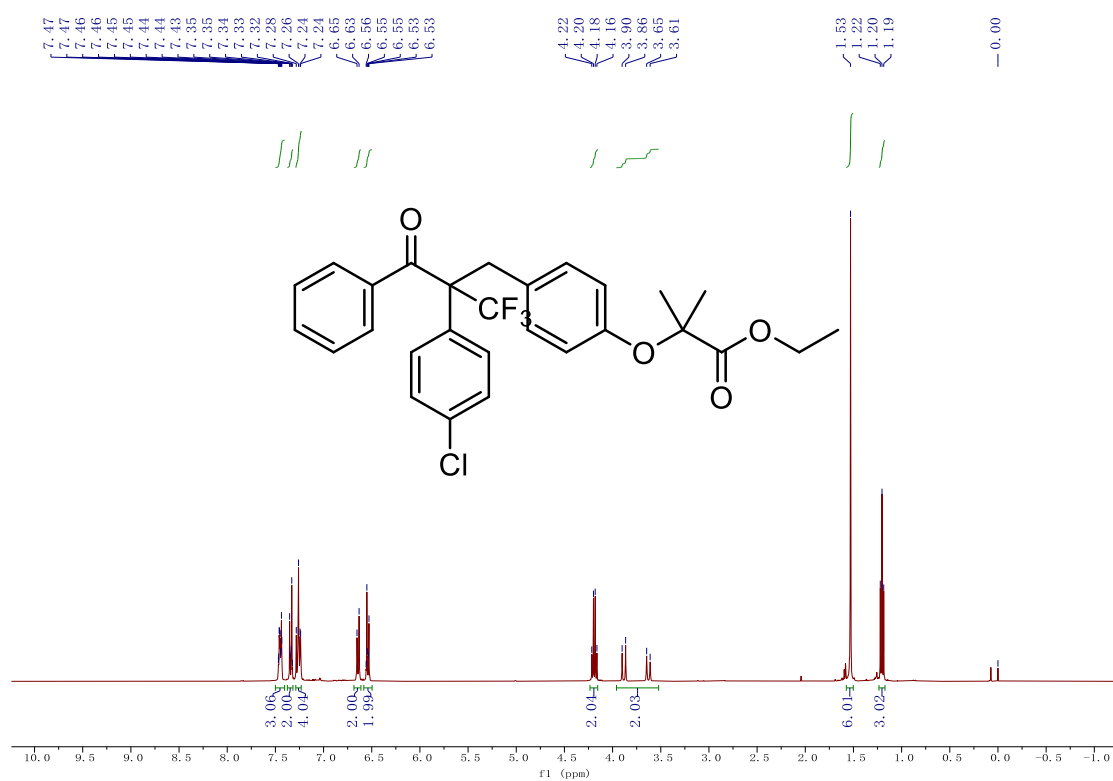

<sup>13</sup>C{<sup>1</sup>H} NMR -spectrum (101MHz, CDCl<sub>3</sub>) of **8**

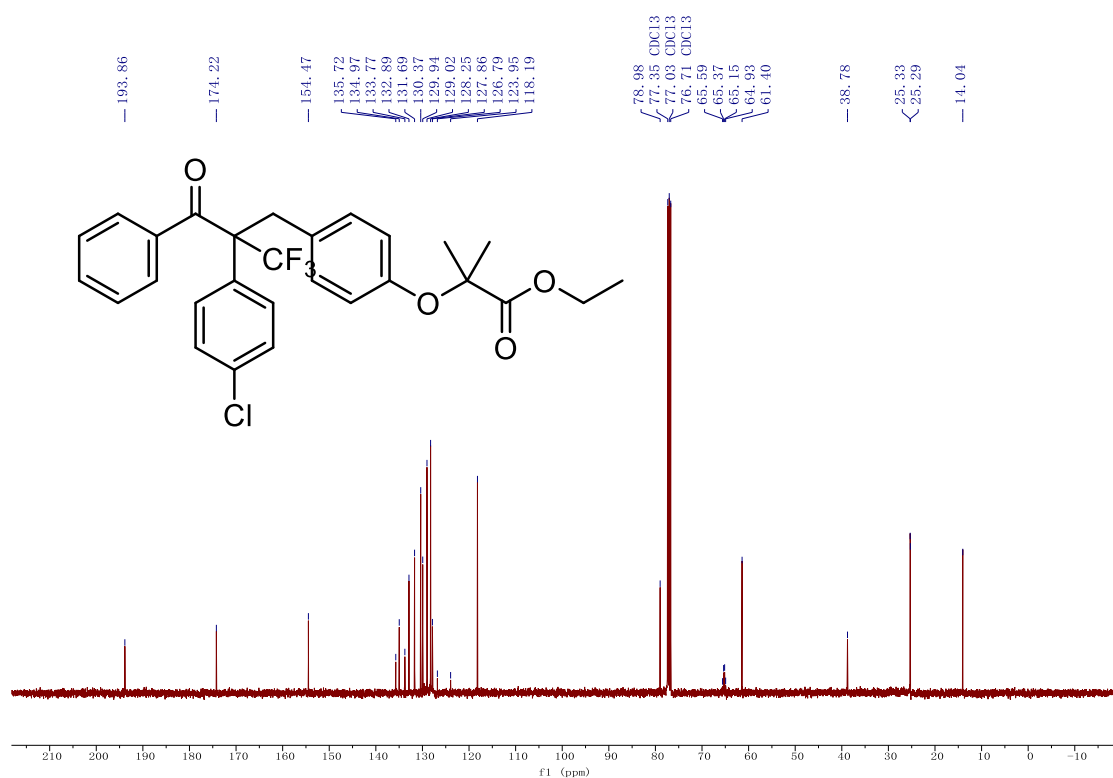

<sup>19</sup>F NMR-spectrum (376 MHz, CDCl<sub>3</sub>) of **8**

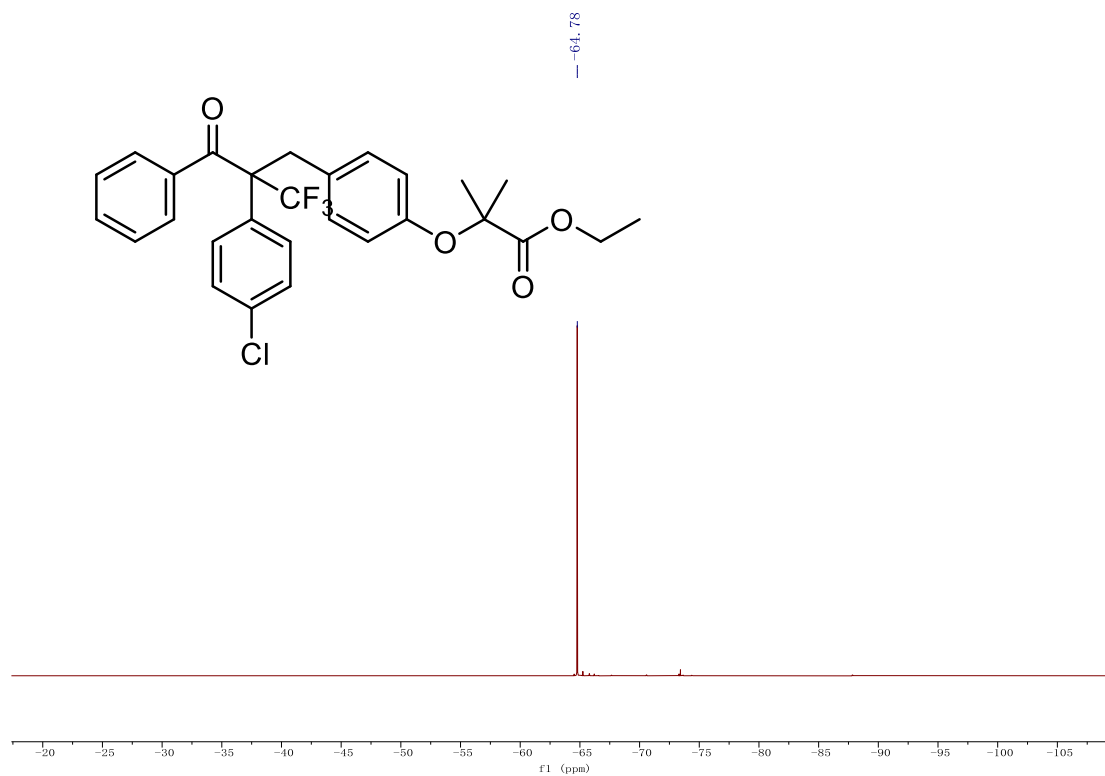

<sup>1</sup>H NMR-spectrum (400MHz, CDCl<sub>3</sub>) of **9**

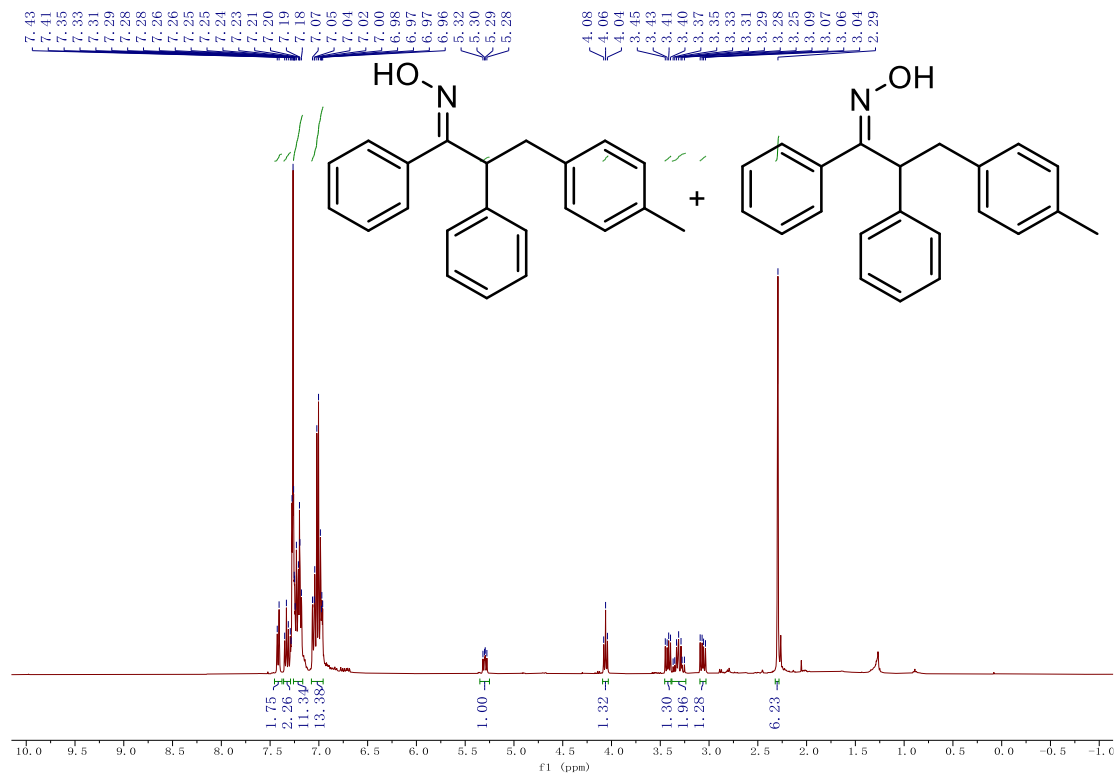

$^{13}\text{C}\{^1\text{H}\}$  NMR-spectrum (101MHz,  $\text{CDCl}_3$ ) of **9**

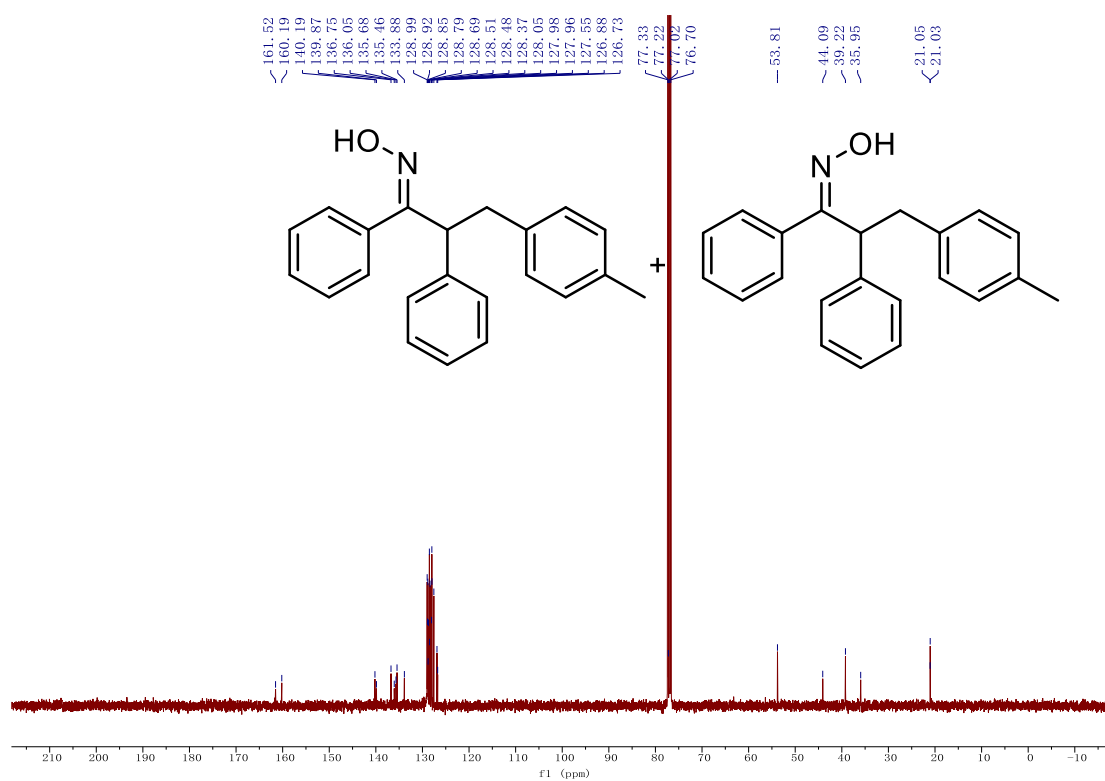

$^1\text{H}$  NMR-spectrum (400MHz,  $\text{CDCl}_3$ ) of **10**

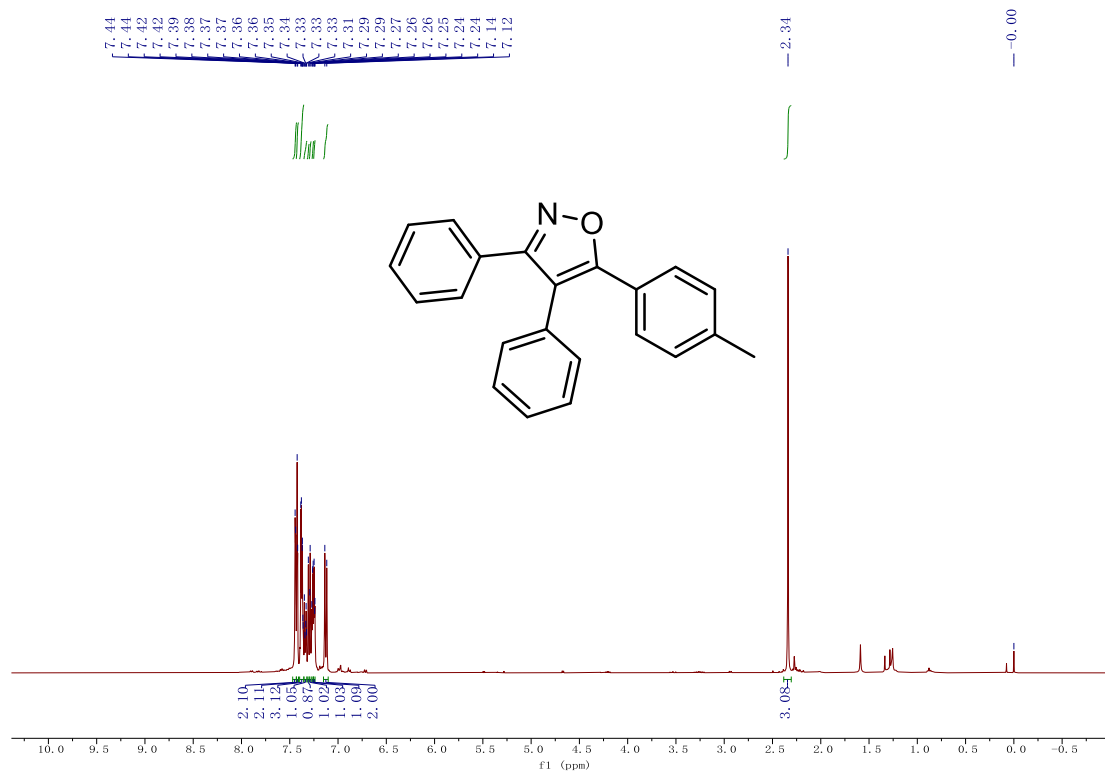

$^{13}\text{C}\{^1\text{H}\}$  NMR-spectrum (101MHz,  $\text{CDCl}_3$ ) of **10**

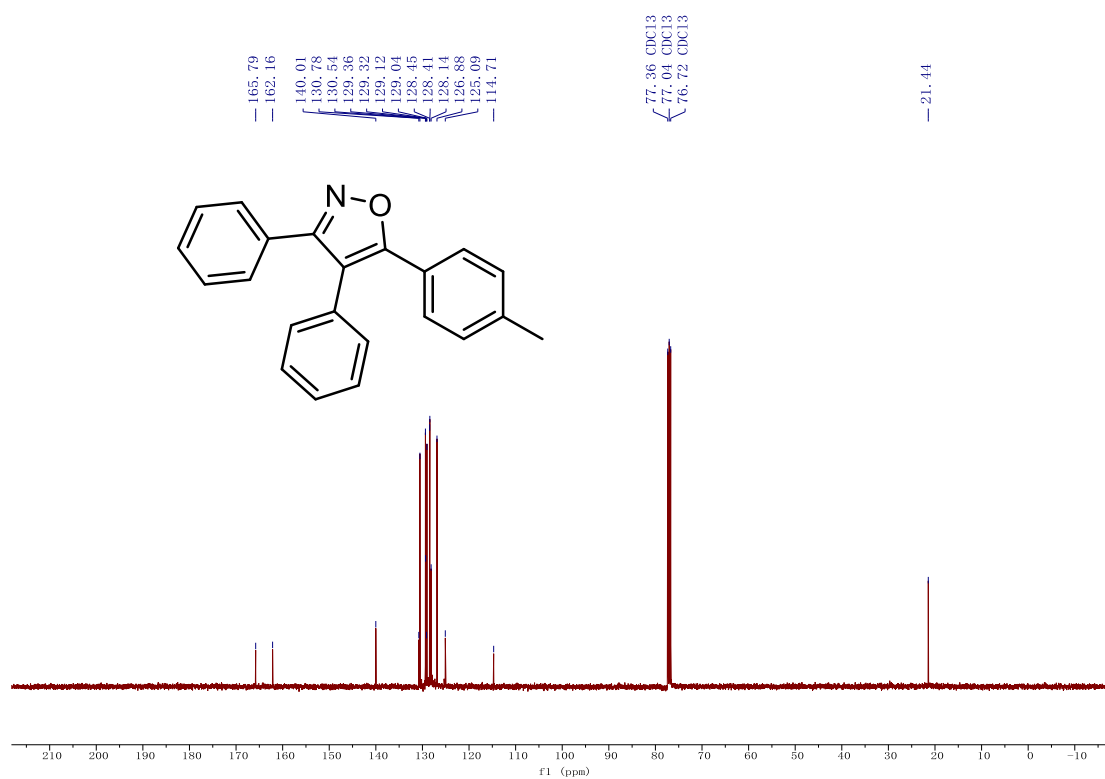

$^1\text{H}$  NMR-spectrum (400MHz,  $\text{CDCl}_3$ ) of **11**

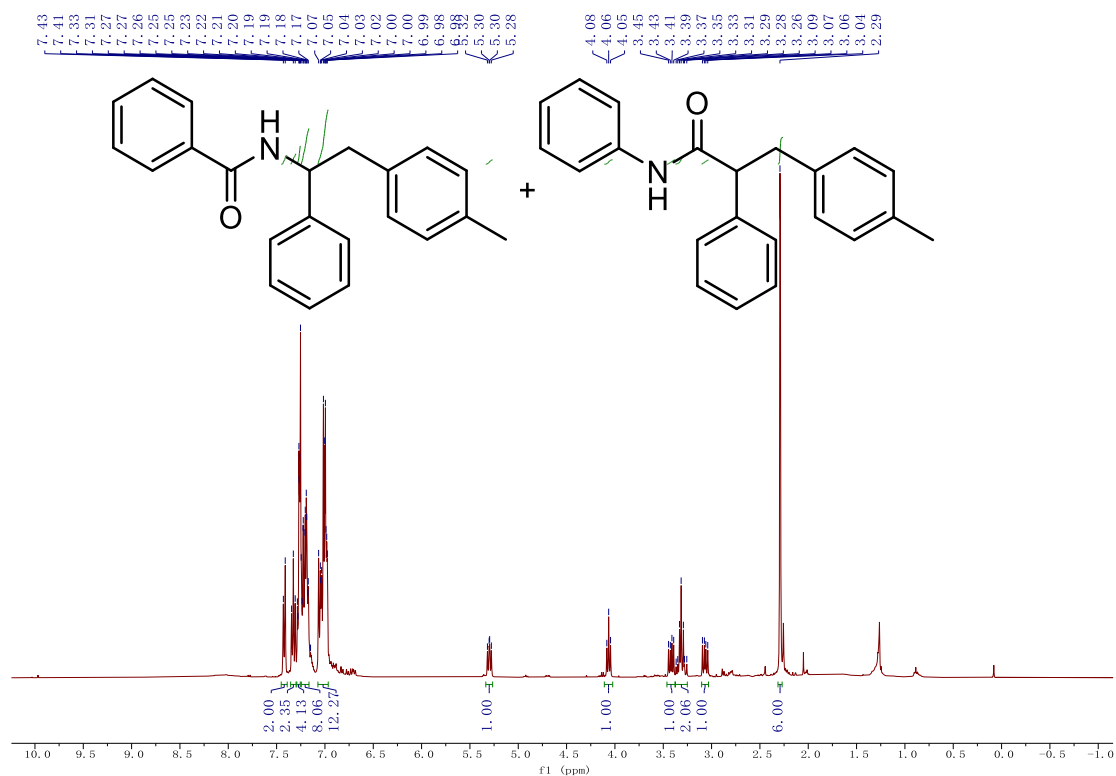

$^{13}\text{C}\{^1\text{H}\}$  NMR -spectrum (101MHz,  $\text{CDCl}_3$ ) of **11**

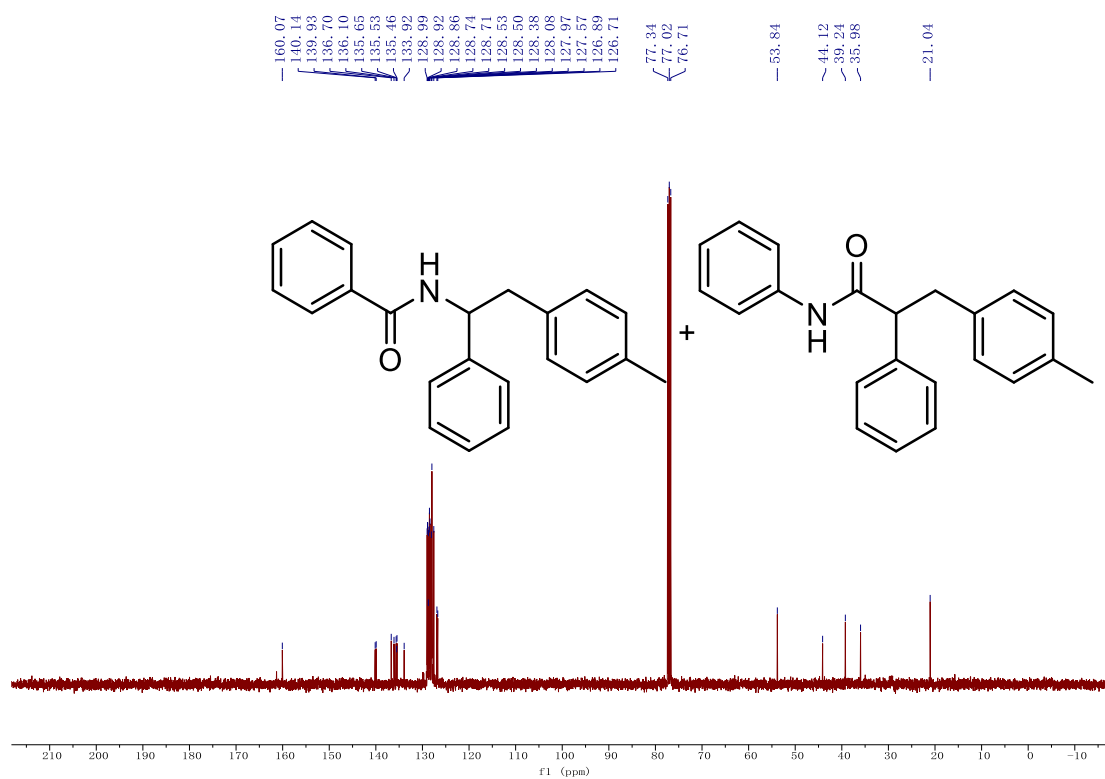

$^1\text{H}$  NMR-spectrum (400MHz,  $\text{CDCl}_3$ ) of **16**

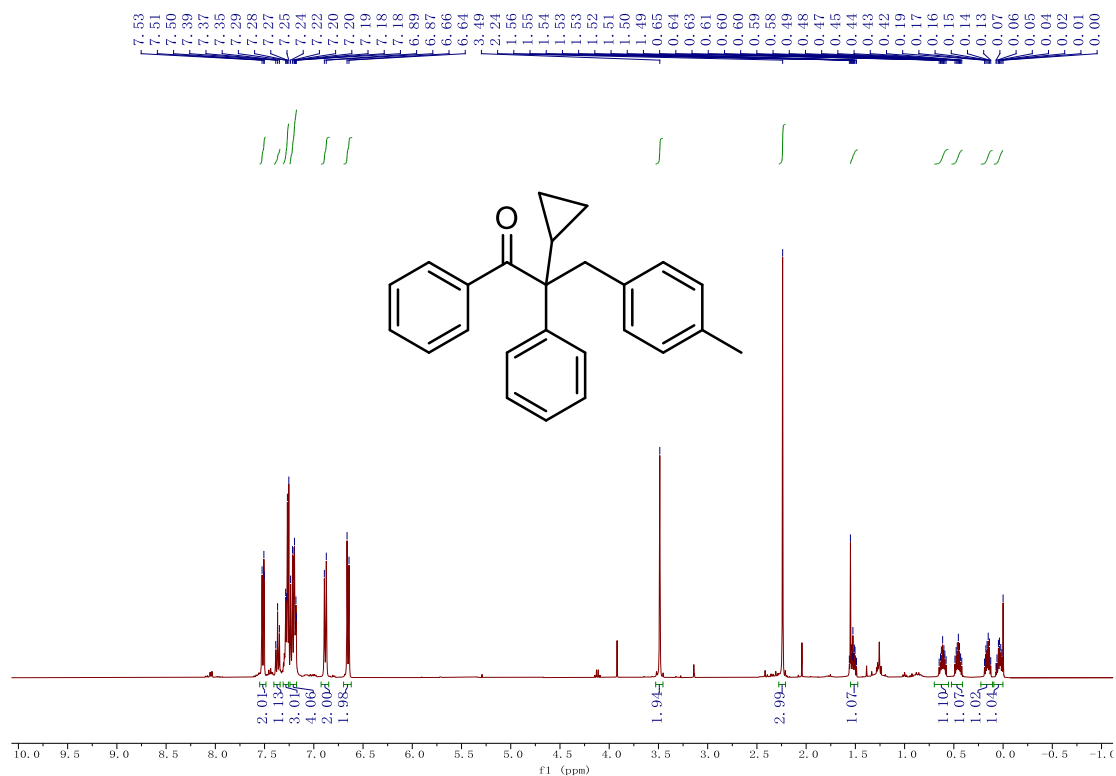

$^{13}\text{C}\{^1\text{H}\}$  NMR-spectrum (101MHz,  $\text{CDCl}_3$ ) of 16

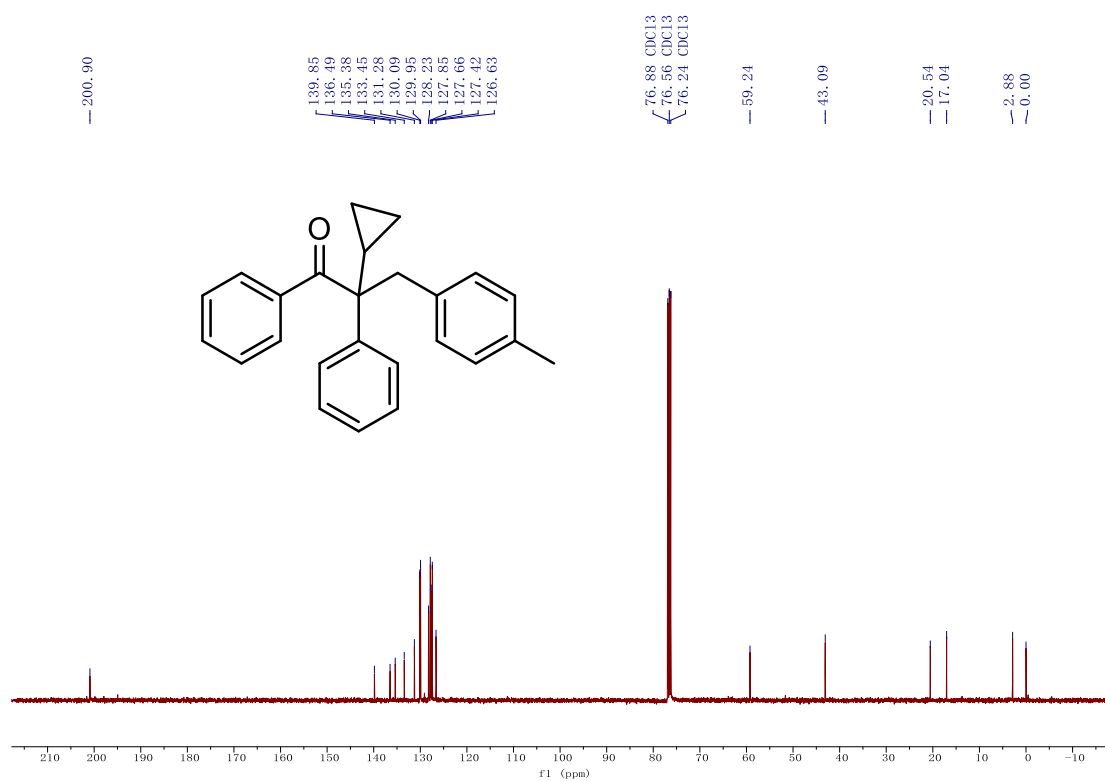

$^1\text{H}$  NMR-spectrum (400MHz,  $\text{CDCl}_3$ ) of 17

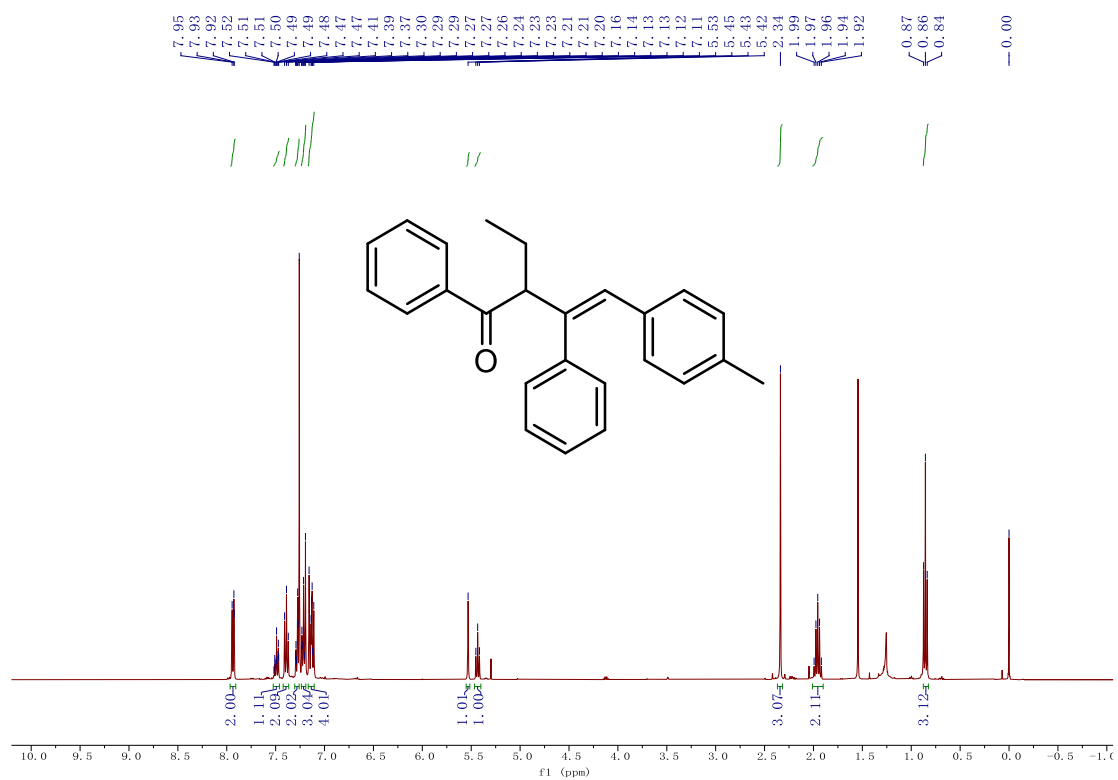

$^{13}\text{C}\{^1\text{H}\}$  NMR -spectrum (101MHz,  $\text{CDCl}_3$ ) of **17**

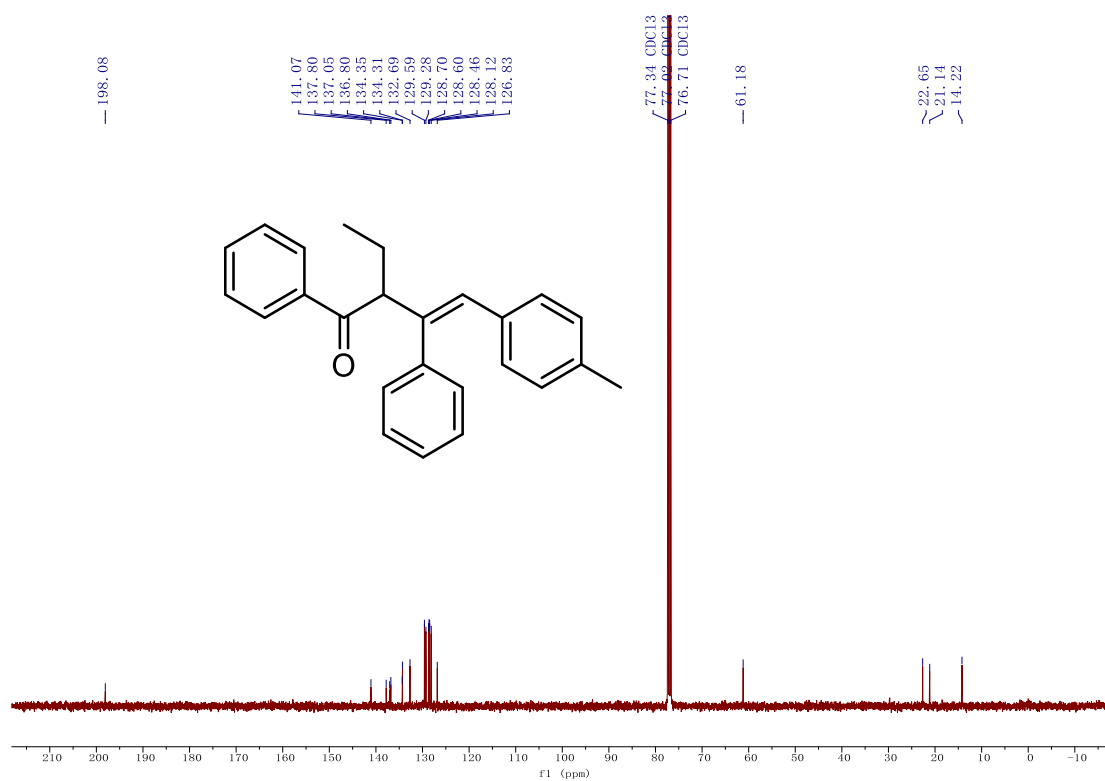

Supplement: d6cc02335e1.pdf [file d6cc02335e1.pdf]
